# Supplementary material for: Simultaneous recording of multiple cellular signaling events by frequency- and spectrally-tuned multiplexing of fluorescent probes
Source: eLife. 2021 Dec 3;10:e63129. doi: 10.7554/eLife.63129 (PMC8700268; doi:10.7554/eLife.63129)
Supplement: Figure 3—source data 1. [file elife-63129-fig3-data1.xlsx]

## Sheet: 3A, D and G
	BCECF-loaded sperm							Fura-2-loaded sperm							RhoVR-loaded sperm
	Optical Filtering			FASTM				Optical Filtering			FASTM				Optical Filtering			FASTM
Time (s)	BCECF channel	RhoVR channel	Fura-2 channel	BCECF channel	RhoVR channel	Fura-2 channel		Fura-2 channel	RhoVR channel	BCECF channel	Fura-2 channel	RhoVR channel	BCECF channel		RhoVR channel	BCECF channel	Fura-2 channel	RhoVR channel	BCECF channel	Fura-2 channel
0.0583	0.999852	0.589766	1.00789	1.00322	0.0738597	0.179693		1.00071	0.676889	0.991666	1.00007	0.128899	0.0163251		1.00477	0.0461679	0.0460327	0.99893	0.0144442	0.0437119
0.0593	1.00054	0.589714	1.00845	1.00302	0.0738597	0.1791		1.0013	0.677111	0.992447	1.00029	0.129454	0.0156591		1.0041	0.0461679	0.0461679	1.00107	0.0143587	0.043883
0.0603	1.00107	0.589184	1.00895	1.00247	0.0735303	0.177963		1.00264	0.679121	0.992447	1.00129	0.131564	0.0138827		1.00328	0.0461679	0.0461002	1.00124	0.0143587	0.0442253
0.0613	1.00203	0.589979	1.00945	1.00253	0.0745186	0.177963		1.0022	0.680348	0.992	1.00185	0.133451	0.0141047		1.00112	0.0462355	0.0461002	0.999531	0.0144442	0.0440541
0.0623	1.00308	0.590191	1.01086	1.00232	0.0749304	0.178408		1.00086	0.680459	0.991777	1.00196	0.133673	0.0144378		0.999025	0.0461679	0.0458974	0.998164	0.0143587	0.0437119
0.0633	1.0033	0.591092	1.01149	1.00238	0.074848	0.179248		1.001	0.680348	0.991777	1.0024	0.132674	0.0146599		0.997605	0.0461002	0.0460327	0.999273	0.0145298	0.0437974
0.0643	1.00287	0.592311	1.01079	1.00253	0.0743127	0.180483		1.00175	0.679232	0.992111	1.00218	0.132674	0.0144378		0.996796	0.0461679	0.0458974	0.998758	0.0145298	0.0441398
0.0653	1.00245	0.593424	1.01065	1.00228	0.0741068	0.181077		1.00234	0.678562	0.992781	1.00163	0.132785	0.0142158		0.995377	0.0460327	0.045965	0.998078	0.0141875	0.043883
0.0663	1.00271	0.593318	1.01143	1.00272	0.0742303	0.180632		1.00249	0.678785	0.993228	1.00218	0.132008	0.0147708		0.994222	0.0461679	0.0458974	0.994906	0.0140163	0.043883
0.0673	1.00277	0.592894	1.01135	1.00267	0.0748068	0.179396		1.00309	0.681242	0.993563	1.00285	0.130342	0.0146599		0.993414	0.0458974	0.045965	0.990883	0.0139308	0.0443965
0.0683	1.00277	0.592205	1.01093	1.00262	0.0745186	0.179002		1.00309	0.682135	0.993787	1.00229	0.127234	0.0145488		0.993006	0.0458298	0.0457622	0.987977	0.0137596	0.044482
0.0693	1.00361	0.592046	1.01156	1.00163	0.074148	0.17905		1.00205	0.679902	0.993563	1.00163	0.12568	0.0143268		0.991451	0.0460327	0.0455593	0.986867	0.0138452	0.0449099
0.0703	1.0043	0.591675	1.0122	1.00198	0.074395	0.178804		1.00205	0.676776	0.993117	1.00118	0.126568	0.0146599		0.99071	0.0460327	0.0458298	0.98532	0.0143587	0.0451666
0.0713	1.00425	0.591198	1.01255	1.00213	0.0741892	0.178161		1.0013	0.675438	0.992447	0.999961	0.130564	0.0148819		0.990981	0.0461679	0.0458298	0.983953	0.0144442	0.0449955
0.0723	1.00356	0.590455	1.01156	1.00277	0.0732832	0.178606		0.999814	0.674321	0.991553	0.999295	0.133118	0.0147708		0.99071	0.0462355	0.0460327	0.983437	0.0145298	0.0451666
0.0733	1.00282	0.58982	1.011	1.00317	0.0733244	0.1791		1.00026	0.674768	0.991107	1.0004	0.133673	0.0152149		0.989963	0.0462355	0.0460327	0.983523	0.0143587	0.0449099
0.0743	1.00271	0.590085	1.01079	1.00356	0.0725008	0.17915		1.001	0.676889	0.991219	1.00074	0.133118	0.0144378		0.987667	0.0461679	0.045965	0.982586	0.0142731	0.0447388
0.0753	1.00298	0.590826	1.01079	1.00351	0.072542	0.178705		1.00234	0.679791	0.992111	1.00118	0.130676	0.0134386		0.984827	0.0461679	0.0458974	0.982328	0.0146154	0.0451666
0.0763	1.00335	0.59141	1.01149	1.00376	0.0725008	0.178902		1.00279	0.680795	0.992781	1.00096	0.130453	0.0127725		0.983543	0.0460327	0.0458974	0.980789	0.0146154	0.0446532
0.0773	1.00393	0.591993	1.01177	1.00376	0.0730773	0.178902		1.0022	0.681129	0.992558	1.00118	0.131675	0.0132166		0.983204	0.0461002	0.0458974	0.978477	0.0144442	0.0443965
0.0783	1.00457	0.59247	1.0122	1.00341	0.0732008	0.178804		1.0013	0.680236	0.992111	1.00085	0.131341	0.0134386		0.983679	0.0460327	0.0456946	0.975742	0.0145298	0.043883
0.0793	1.00409	0.592576	1.01177	1.00312	0.0738185	0.178705		1.00086	0.679678	0.992334	1.00118	0.130009	0.0139936		0.982796	0.045965	0.0457622	0.971203	0.0145298	0.0441398
0.0803	1.0034	0.592523	1.01079	1.00292	0.0739009	0.178458		1.0016	0.677334	0.992336	1.00174	0.132008	0.0145488		0.981377	0.0458298	0.0456946	0.969664	0.014102	0.0439686
0.0813	1.00319	0.593212	1.01079	1.00381	0.0737774	0.17915		1.00264	0.675325	0.992558	1.00063	0.130454	0.0148819		0.980296	0.0461679	0.0458974	0.969664	0.0141875	0.0439686
0.0823	1.00377	0.593106	1.01128	1.00465	0.0735302	0.180039		1.0022	0.673092	0.991666	1.00007	0.127789	0.0152149		0.980296	0.045965	0.045965	0.970602	0.0145298	0.0442253
0.0833	1.00361	0.592311	1.0117	1.00435	0.0735303	0.180286		1.0016	0.671865	0.991219	1.00029	0.127567	0.0144378		0.980296	0.0462355	0.0463031	0.97018	0.0144442	0.0442253
0.0843	1.00351	0.591251	1.01156	1.0043	0.0731185	0.180632		1.00205	0.672981	0.99066	0.999849	0.128011	0.0138827		0.979821	0.0463031	0.0461002	0.969836	0.0145298	0.0439686
0.0853	1.00361	0.591039	1.01156	1.00489	0.073942	0.180978		1.0013	0.675438	0.991219	0.999627	0.128455	0.0133276		0.979957	0.0463707	0.0461679	0.969836	0.0145298	0.0442253
0.0863	1.00441	0.591251	1.01213	1.0045	0.0743539	0.18167		1.00115	0.676664	0.991442	1.00007	0.128677	0.0134386		0.979216	0.0461679	0.045965	0.97043	0.0145298	0.0443965
0.0873	1.00521	0.591145	1.01291	1.00351	0.0742303	0.18167		1.001	0.678451	0.991889	1.00085	0.130676	0.0135496		0.978068	0.0461679	0.045965	0.969148	0.014701	0.0446532
0.0883	1.00568	0.591251	1.01319	1.00272	0.074395	0.181571		1.0016	0.678785	0.992	1.00118	0.136893	0.0133276		0.977185	0.0460327	0.0458974	0.971203	0.0142731	0.0443109
0.0893	1.00547	0.591887	1.01333	1.00307	0.0750539	0.181521		1.00309	0.679678	0.992447	1.00229	0.139557	0.0128835		0.975093	0.0461002	0.0456946	0.971633	0.0140163	0.0443109
0.0903	1.00483	0.59247	1.01284	1.00435	0.0758361	0.181571		1.00324	0.682469	0.992781	1.00262	0.139446	0.0132166		0.972383	0.0460327	0.0456946	0.971375	0.0143587	0.0440541
0.0913	1.00377	0.59141	1.01163	1.00495	0.0774421	0.18162		1.00279	0.68392	0.993117	1.00229	0.135005	0.0135496		0.971099	0.0457622	0.0456269	0.96975	0.0142731	0.0442253
0.0923	1.00308	0.591198	1.011	1.00509	0.0777308	0.181274		1.00249	0.684367	0.99334	1.00296	0.130786	0.0146599		0.970963	0.045965	0.0458298	0.968383	0.0144442	0.0443109
0.0933	1.00351	0.591728	1.01121	1.00598	0.0769895	0.179989		1.00264	0.683697	0.993674	1.00285	0.130676	0.0149928		0.969543	0.0460327	0.0458974	0.965039	0.0144442	0.0445677
0.0943	1.00452	0.591569	1.01227	1.00578	0.0747656	0.179347		1.00234	0.684925	0.993228	1.0024	0.129565	0.0152149		0.96684	0.0458974	0.0456946	0.961187	0.0151289	0.0443965
0.0953	1.00531	0.591092	1.01319	1.00574	0.0734479	0.179198		1.00294	0.684813	0.993674	1.00118	0.128788	0.0148819		0.965895	0.0460327	0.0460327	0.959992	0.0149577	0.0447388
0.0963	1.00526	0.591039	1.01255	1.00583	0.0729126	0.179248		1.0019	0.683697	0.992781	1.00129	0.127345	0.0149928		0.966235	0.0462355	0.0461002	0.96025	0.0147866	0.0446532
0.0973	1.00488	0.591304	1.01192	1.00653	0.0725831	0.180286		1.00071	0.683697	0.99133	1.00107	0.128788	0.0142157		0.966907	0.046506	0.0463031	0.959906	0.0145298	0.0449955
0.0983	1.0051	0.591357	1.01199	1.00702	0.0722949	0.181027		1.00086	0.682804	0.991666	1.00096	0.128344	0.0141047		0.965963	0.046506	0.046506	0.958109	0.0145298	0.0443965
0.0993	1.00521	0.591515	1.01241	1.00653	0.0729126	0.180632		1.0016	0.682135	0.991777	1.00107	0.126679	0.0138827		0.964944	0.0463707	0.0462355	0.956398	0.0144442	0.0443965
0.1003	1.00521	0.591622	1.01206	1.00662	0.0719243	0.179792		1.00145	0.680572	0.99133	1.00229	0.127789	0.0128835		0.963259	0.0463707	0.0460327	0.956313	0.0141875	0.044482
0.1013	1.00473	0.591569	1.01143	1.00647	0.0711006	0.17994		1.00011	0.680906	0.990437	1.00296	0.130564	0.0136607		0.96116	0.0463031	0.0461002	0.957336	0.0139308	0.0441398
0.1023	1.00462	0.591039	1.01093	1.00598	0.0710183	0.180829		1.00071	0.681576	0.990437	1.00285	0.131231	0.015548		0.960148	0.0463031	0.0461002	0.958023	0.0145298	0.0443109
0.1033	1.00499	0.590668	1.01135	1.00568	0.0716359	0.180237		1.00086	0.682246	0.991107	1.00285	0.130231	0.0154369		0.958864	0.0465736	0.0462355	0.957172	0.0145298	0.0442253
0.1043	1.00531	0.590509	1.01227	1.00524	0.072542	0.180385		1.001	0.679902	0.991219	1.00229	0.129676	0.0153259		0.958457	0.0465736	0.0464383	0.955203	0.0146154	0.0440541
0.1053	1.006	0.590562	1.01312	1.00539	0.0727067	0.180088		1.0013	0.67767	0.991889	1.00129	0.128788	0.0145488		0.958728	0.046844	0.0463031	0.95332	0.014701	0.0439686
0.1063	1.00637	0.591251	1.01354	1.00583	0.0727067	0.180385		1.00205	0.677446	0.992558	1.00051	0.129898	0.0149928		0.957574	0.0466412	0.0463707	0.951438	0.0144442	0.0436262
0.1073	1.0061	0.591251	1.01326	1.00613	0.0733656	0.179644		1.00234	0.678785	0.99267	1.00085	0.131009	0.0145488		0.955617	0.0463031	0.0462355	0.949039	0.014701	0.0441398
0.1083	1.00568	0.59141	1.01255	1.00623	0.0734479	0.178952		1.00145	0.681688	0.992781	1.00163	0.13445	0.0144378		0.953858	0.046506	0.0462355	0.94707	0.0148721	0.0439686
0.1093	1.00505	0.591515	1.01177	1.00613	0.0736538	0.178952		1.0016	0.683474	0.992336	1.0014	0.137115	0.0141047		0.953586	0.0462355	0.0463031	0.947672	0.0145298	0.0441398
0.1103	1.00446	0.590509	1.01093	1.00593	0.0739421	0.17915		1.0019	0.682804	0.992111	1.00085	0.137781	0.0135496		0.952846	0.0465736	0.0463031	0.947844	0.014701	0.0442253
0.1113	1.00446	0.590455	1.011	1.00583	0.0726243	0.179347		1.0022	0.68258	0.991777	1.00063	0.137892	0.0141047		0.952302	0.046506	0.0463031	0.948008	0.0147866	0.0442253
0.1123	1.00435	0.591357	1.01086	1.00549	0.0725831	0.17994		1.0016	0.683697	0.991553	1.00096	0.136449	0.0138827		0.951963	0.0463707	0.0463031	0.947156	0.0148721	0.0440541
0.1133	1.00414	0.591993	1.01072	1.00539	0.0731185	0.180187		1.00115	0.683697	0.991219	1.00151	0.133784	0.0129945		0.951154	0.0464383	0.0462355	0.943477	0.0144442	0.0443109
0.1143	1.00425	0.591092	1.01121	1.00514	0.0734479	0.180385		1.001	0.683363	0.991666	1.00107	0.13112	0.0137716		0.950142	0.0463707	0.0461679	0.940992	0.0144442	0.043883
0.1153	1.00526	0.590668	1.01241	1.00509	0.0742304	0.180237		1.0019	0.682135	0.992447	1.00085	0.131231	0.0137716		0.948111	0.046506	0.0463707	0.940055	0.0145298	0.043883
0.1163	1.00568	0.590403	1.01326	1.00549	0.0757955	0.180286		1.00205	0.68191	0.992558	1.00063	0.13112	0.0141047		0.946759	0.0465736	0.0463031	0.940055	0.0145298	0.0441398
0.1173	1.00589	0.59035	1.01312	1.00578	0.0764955	0.180483		1.0019	0.681018	0.992558	1.00129	0.131564	0.0136607		0.946148	0.0463707	0.0463031	0.940141	0.0143587	0.0442253
0.1183	1.00605	0.590933	1.01298	1.00593	0.0768662	0.179989		1.0016	0.682135	0.992223	1.00196	0.131453	0.0133276		0.94608	0.0467764	0.0464383	0.940484	0.0146154	0.0443109
0.1193	1.00595	0.591728	1.01284	1.00653	0.0761662	0.17994		1.0013	0.682246	0.991889	1.00274	0.130675	0.0138827		0.945679	0.0467088	0.046506	0.940648	0.0146154	0.0440541
0.1203	1.00595	0.592046	1.01241	1.00707	0.0752602	0.179693		1.0013	0.681242	0.991442	1.0024	0.132341	0.0148819		0.945272	0.046506	0.0463707	0.939453	0.0145298	0.0443109
0.1213	1.00626	0.592152	1.01284	1.00712	0.0748892	0.178902		1.00264	0.679678	0.992111	1.00118	0.136781	0.0161031		0.943377	0.0465736	0.0463031	0.939023	0.0144442	0.0441398
0.1223	1.00621	0.591834	1.01326	1.00732	0.0755481	0.178853		1.00368	0.678785	0.99267	1.00118	0.138336	0.0148819		0.942228	0.0463707	0.0460327	0.937828	0.0147866	0.0442253
0.1233	1.00669	0.591569	1.01326	1.00737	0.0753008	0.179198		1.00413	0.679344	0.99334	1.00107	0.138336	0.0134386		0.942296	0.0464383	0.0463031	0.936633	0.0146154	0.0445677
0.1243	1.00626	0.591834	1.01312	1.00741	0.0742303	0.179742		1.00458	0.680125	0.994121	1.00151	0.137226	0.0135496		0.943512	0.0466412	0.0461679	0.934578	0.0143587	0.0447388
0.1253	1.00563	0.591675	1.01234	1.00741	0.0731185	0.179644		1.00413	0.680125	0.99401	1.00085	0.135116	0.0131055		0.943716	0.0464383	0.0460327	0.934063	0.014701	0.0447388
0.1263	1.00547	0.591622	1.01234	1.00697	0.0724595	0.180237		1.00383	0.680014	0.994121	1.00029	0.135005	0.0125504		0.943105	0.046506	0.0462355	0.933977	0.0147866	0.0445677
0.1273	1.00605	0.591515	1.01305	1.00687	0.0724595	0.180483		1.00353	0.679678	0.993787	1.00074	0.132341	0.0125504		0.942432	0.0465736	0.0463031	0.935008	0.0143587	0.0443109
0.1283	1.00605	0.591781	1.0134	1.00672	0.0734479	0.180435		1.00339	0.679121	0.99334	1.00018	0.130786	0.0133276		0.941414	0.046506	0.0461679	0.936547	0.0144442	0.0443965
0.1293	1.00589	0.591463	1.01305	1.00682	0.0746833	0.180385		1.00339	0.679121	0.993004	0.999182	0.133007	0.0138827		0.939994	0.0463707	0.0461002	0.937828	0.0142731	0.0445677
0.1303	1.00568	0.59141	1.01241	1.00747	0.0757128	0.180187		1.00413	0.680236	0.992893	0.999405	0.130231	0.0139936		0.939185	0.0463031	0.045965	0.938086	0.0143587	0.044482
0.1313	1.00605	0.591781	1.01312	1.00856	0.0750951	0.180681		1.00353	0.680236	0.992336	0.999627	0.123792	0.0145488		0.938642	0.0462355	0.0461002	0.936203	0.0142731	0.0442253
0.1323	1.00626	0.593159	1.01368	1.00856	0.074148	0.180879		1.0019	0.681129	0.991553	1.00096	0.121572	0.0147708		0.93729	0.046506	0.0461679	0.933203	0.014701	0.044482
0.1333	1.00615	0.593477	1.01375	1.00875	0.0733244	0.180681		1.00115	0.682023	0.99133	1.00218	0.123237	0.0149928		0.936278	0.0463707	0.045965	0.932352	0.0145298	0.044482
0.1343	1.00626	0.592947	1.01361	1.0092	0.0730361	0.180533		1.00145	0.682246	0.99133	1.00151	0.125902	0.0147708		0.935735	0.0464383	0.0461002	0.932609	0.0147866	0.044482
0.1353	1.00637	0.592364	1.0139	1.0089	0.0738185	0.179792		1.00175	0.681242	0.991107	1.0004	0.129232	0.0132166		0.934722	0.0463707	0.0461002	0.932953	0.0144442	0.0446532
0.1363	1.00605	0.592205	1.01305	1.00845	0.0750539	0.178902		1.00398	0.680906	0.991889	0.999961	0.130564	0.0124394		0.933506	0.0466412	0.0463031	0.932953	0.0145298	0.0448244
0.1373	1.00621	0.592205	1.01298	1.00856	0.0757128	0.178804		1.00547	0.680795	0.993004	0.998739	0.130231	0.0118843		0.932895	0.0464383	0.0462355	0.932438	0.0145298	0.0447388
0.1383	1.00648	0.591622	1.0134	1.009	0.0756308	0.178556		1.00473	0.682023	0.992781	0.99885	0.122904	0.0121064		0.932358	0.0464383	0.0462355	0.932094	0.0146154	0.044482
0.1393	1.00648	0.591357	1.01312	1.00885	0.0753008	0.178705		1.00279	0.682804	0.992447	0.99885	0.121572	0.0123284		0.931747	0.0464383	0.0463031	0.931836	0.014701	0.0448244
0.1403	1.00643	0.592258	1.01298	1.00925	0.0748068	0.179693		1.00264	0.681688	0.993117	0.998961	0.124569	0.0128835		0.931951	0.0463707	0.0463031	0.932523	0.0145298	0.0449955
0.1413	1.00595	0.593424	1.01291	1.0092	0.074601	0.179446		1.00279	0.679455	0.993117	0.999738	0.132008	0.0134386		0.932358	0.0463707	0.0462355	0.932523	0.0147866	0.0449099
0.1423	1.00584	0.594166	1.01319	1.00865	0.0733244	0.178902		1.00309	0.679455	0.99401	1.00151	0.136227	0.0133276		0.931543	0.046506	0.0463031	0.930984	0.0145298	0.0446532
0.1433	1.0061	0.594007	1.01333	1.00856	0.072336	0.178754		1.00279	0.679232	0.994121	1.00163	0.136115	0.0132166		0.930191	0.0463707	0.0463707	0.929695	0.0143587	0.044482
0.1443	1.00632	0.593583	1.01347	1.00856	0.0711418	0.179989		1.00324	0.677	0.994344	1.00296	0.132674	0.0131056		0.928704	0.0463707	0.0458974	0.92807	0.0141875	0.0443965
0.1453	1.0069	0.593265	1.0139	1.0088	0.0722537	0.180286		1.00234	0.678115	0.993787	1.0014	0.131342	0.0137716		0.927827	0.0461679	0.045965	0.928758	0.0142731	0.0445677
0.1463	1.00732	0.592894	1.0146	1.00856	0.0737362	0.180088		1.00249	0.679008	0.99401	1.00196	0.129232	0.0139936		0.927488	0.0462355	0.0458974	0.929273	0.0142731	0.0446532
0.1473	1.00817	0.591993	1.01503	1.00929	0.074601	0.179594		1.00353	0.679455	0.994568	1.00196	0.12901	0.0139936		0.926068	0.0462355	0.0461678	0.927133	0.0145298	0.0449099
0.1483	1.00859	0.591357	1.01524	1.00885	0.0746421	0.180088		1.00413	0.681576	0.995349	1.00085	0.13012	0.0135496		0.925389	0.0464383	0.0462355	0.925164	0.0144442	0.0446532
0.1493	1.00875	0.591622	1.01552	1.00831	0.0733244	0.181472		1.00413	0.682246	0.995572	0.999961	0.13112	0.0132166		0.924988	0.046506	0.0461679	0.921141	0.0141875	0.0449099
0.1503	1.00897	0.591887	1.01581	1.00845	0.0738597	0.182016		1.00413	0.68191	0.994568	1.00096	0.130564	0.0129945		0.925525	0.0463707	0.0461002	0.920117	0.0144442	0.044482
0.1513	1.00913	0.593159	1.01581	1.0086	0.0743127	0.181868		1.00398	0.681242	0.994568	1.0024	0.135338	0.0127725		0.924852	0.0462355	0.0461002	0.920539	0.014701	0.0447388
0.1523	1.00886	0.594166	1.01566	1.00954	0.0737362	0.181472		1.00398	0.682469	0.994791	1.00274	0.13878	0.0121064		0.923704	0.0463707	0.0463031	0.921398	0.0147866	0.0448244
0.1533	1.00828	0.594484	1.01495	1.01023	0.0735714	0.180879		1.00443	0.683361	0.994902	1.00262	0.137558	0.0135496		0.923833	0.0464383	0.0463031	0.921312	0.0144442	0.0449099
0.1543	1.00791	0.593848	1.01481	1.01053	0.0729538	0.1791		1.00353	0.685707	0.993787	1.00274	0.136559	0.0144378		0.924105	0.0463031	0.0462355	0.919602	0.0142731	0.0449099
0.1553	1.00849	0.593424	1.01517	1.01098	0.0728302	0.178408		1.00145	0.686041	0.992223	1.00151	0.13445	0.0156589		0.923636	0.0463707	0.0461679	0.916602	0.0141875	0.0446532
0.1563	1.00902	0.592735	1.01545	1.01117	0.0727478	0.178161		1.00145	0.68526	0.991666	1.0014	0.133229	0.0156591		0.923296	0.0461679	0.0461002	0.915578	0.0139308	0.0443109
0.1573	1.00928	0.592629	1.01545	1.01127	0.0729126	0.17742		1.00249	0.684367	0.992334	1.00118	0.132785	0.0158811		0.922957	0.0463031	0.045965	0.91532	0.0139308	0.044482
0.1583	1.0095	0.592523	1.01615	1.01073	0.0731185	0.178211		1.00368	0.683808	0.993674	1.0014	0.131675	0.015992		0.922753	0.0461679	0.045965	0.914719	0.0142731	0.0441398
0.1593	1.00971	0.59247	1.0163	1.01018	0.0736126	0.178309		1.00473	0.681688	0.994232	1.00151	0.131786	0.0162141		0.922481	0.045965	0.045965	0.911813	0.0143587	0.0443965
0.1603	1.01072	0.593	1.01715	1.01033	0.0733656	0.178902		1.00428	0.678004	0.993898	1.00174	0.132785	0.0163251		0.922284	0.0462355	0.0461002	0.910273	0.0138452	0.0443965
0.1613	1.01135	0.59353	1.01799	1.01023	0.0736538	0.179248		1.00309	0.676442	0.993228	1.00218	0.132563	0.015548		0.921741	0.0464383	0.0461679	0.910359	0.014102	0.044482
0.1623	1.01146	0.59406	1.01799	1.01048	0.0740656	0.179841		1.0016	0.67499	0.991666	1.00218	0.131564	0.0147708		0.920858	0.0466412	0.0461679	0.910953	0.0146154	0.0447388
0.1633	1.01146	0.59512	1.01792	1.01058	0.0741068	0.180039		1.00071	0.67499	0.991777	1.00174	0.131231	0.0142157		0.919981	0.0463707	0.0461679	0.911555	0.014701	0.0446532
0.1643	1.01177	0.595597	1.01792	1.01038	0.0736538	0.179792		1.0013	0.678227	0.992111	1.00251	0.128566	0.0154369		0.919173	0.0464383	0.0463031	0.912414	0.014701	0.0443109
0.1653	1.01204	0.595438	1.01828	1.01083	0.0730773	0.179989		1.00175	0.683027	0.99267	1.00207	0.129454	0.015548		0.918833	0.0463707	0.0460327	0.913094	0.0145298	0.0443109
0.1663	1.01172	0.59459	1.01765	1.01077	0.0724184	0.179792		1.00145	0.684478	0.992223	1.0014	0.129454	0.0162141		0.917889	0.0461002	0.0460327	0.914805	0.0147866	0.044482
0.1673	1.01125	0.59406	1.01757	1.01181	0.0725831	0.179544		1.00279	0.685482	0.992336	1.00151	0.131009	0.0161031		0.91829	0.0458298	0.0457622	0.916602	0.0146154	0.0443109
0.1683	1.01156	0.593583	1.01785	1.0125	0.0735303	0.179298		1.00339	0.686488	0.993451	1.00196	0.137226	0.0149928		0.918765	0.0460327	0.0456946	0.918234	0.0143587	0.0440541
0.1693	1.01215	0.59353	1.01842	1.01256	0.0746421	0.179693		1.00294	0.686041	0.993451	1.00285	0.140001	0.0146599		0.918019	0.0458298	0.0457622	0.917977	0.0146154	0.0440541
0.1703	1.01246	0.594696	1.01899	1.01236	0.0750539	0.179841		1.00205	0.683027	0.992781	1.0024	0.138335	0.0144378		0.917685	0.045965	0.0458974	0.917547	0.014701	0.0440541
0.1713	1.01204	0.594749	1.01863	1.01191	0.0751774	0.1791		1.00234	0.679791	0.992447	1.00063	0.139114	0.0136607		0.917481	0.0458974	0.0456946	0.917547	0.0144442	0.0441398
0.1723	1.01204	0.593795	1.01885	1.01236	0.0755068	0.178359		1.00115	0.679008	0.991107	0.999849	0.140778	0.0136607		0.917074	0.045965	0.0456269	0.916516	0.0147866	0.0443965
0.1733	1.01246	0.593636	1.01906	1.0128	0.0749304	0.178211		1.0013	0.680236	0.990437	1.00085	0.139557	0.0138827		0.91613	0.0458974	0.0456946	0.914039	0.0146154	0.0443109
0.1743	1.01246	0.593265	1.01941	1.01344	0.074395	0.177717		1.0013	0.680572	0.99066	1.00174	0.136338	0.0129945		0.915451	0.0461002	0.0458974	0.91318	0.014701	0.0441398
0.1753	1.01294	0.593371	1.0199	1.01483	0.0745186	0.17742		1.00205	0.68258	0.99133	1.0024	0.131786	0.0124394		0.914846	0.0461679	0.045965	0.912328	0.0152145	0.0443109
0.1763	1.01358	0.594113	1.02047	1.01552	0.0749304	0.17826		1.00398	0.683363	0.992223	1.00218	0.13112	0.0119953		0.914975	0.0461679	0.0461002	0.912922	0.0149577	0.0443965
0.1773	1.01363	0.594484	1.02075	1.01517	0.0755068	0.179396		1.00443	0.684255	0.993563	1.00051	0.130453	0.0122174		0.915519	0.046506	0.0463031	0.914719	0.0143587	0.0441398
0.1783	1.01332	0.594166	1.02082	1.01458	0.0756308	0.179742		1.00473	0.68459	0.993563	0.999738	0.129343	0.0125504		0.915994	0.0465736	0.0462355	0.915234	0.0140164	0.0445677
0.1793	1.01321	0.593901	1.02047	1.01492	0.0753835	0.179396		1.00398	0.684255	0.992558	0.998961	0.128011	0.0123284		0.915519	0.046506	0.0463031	0.91575	0.014102	0.0445677
0.1803	1.01395	0.593954	1.02082	1.01621	0.0744362	0.179446		1.00234	0.683363	0.990772	0.99885	0.125569	0.0119953		0.914914	0.046506	0.0463031	0.913438	0.0143587	0.0449099
0.1813	1.01485	0.593424	1.02174	1.01626	0.073695	0.179693		1.00041	0.682023	0.989656	0.99885	0.121128	0.0127725		0.913623	0.046506	0.0461002	0.912242	0.0144442	0.0448244
0.1823	1.01591	0.593	1.0228	1.01552	0.0732008	0.179248		1.00041	0.681018	0.990215	0.999738	0.12024	0.0132166		0.911123	0.046506	0.0464383	0.911898	0.0147866	0.0449955
0.1833	1.01655	0.593424	1.0233	1.01473	0.0730773	0.179298		1.001	0.680683	0.991777	1.00096	0.122127	0.0131055		0.910043	0.0464383	0.0462355	0.910789	0.0145298	0.0445677
0.1843	1.01639	0.594378	1.02294	1.01542	0.0719242	0.179248		1.00234	0.68325	0.993563	1.00163	0.124569	0.0138827		0.909364	0.0464383	0.0461679	0.909672	0.014701	0.0449099
0.1853	1.01602	0.594855	1.02294	1.01621	0.0701123	0.17994		1.00234	0.68459	0.994121	1.00118	0.126346	0.0141047		0.909704	0.0464383	0.0463031	0.910445	0.0147866	0.0449099
0.1863	1.01644	0.594537	1.02344	1.0169	0.0699888	0.180286		1.0022	0.685595	0.99401	1.0014	0.128011	0.0139936		0.911531	0.0461679	0.0461002	0.911469	0.0150433	0.0451666
0.1873	1.01649	0.594166	1.02344	1.017	0.0698653	0.180385		1.00219	0.685595	0.993898	1.0014	0.127789	0.0133276		0.912611	0.0462355	0.0461002	0.912672	0.0148721	0.0449955
0.1883	1.01607	0.594219	1.02252	1.01651	0.07073	0.18078		1.00353	0.684478	0.99401	1.00096	0.127123	0.0126615		0.913019	0.0464383	0.0460327	0.912586	0.0151289	0.0449955
0.1893	1.01538	0.594378	1.0211	1.01596	0.0712653	0.181027		1.00398	0.683139	0.99334	1.00029	0.127234	0.0126615		0.913426	0.0461679	0.0458974	0.914977	0.0147866	0.0448244
0.1903	1.01459	0.594961	1.02005	1.01592	0.0714713	0.180632		1.00368	0.681576	0.993004	1.0004	0.127234	0.0131055		0.912815	0.0464383	0.0460327	0.914891	0.0148721	0.0448244
0.1913	1.01437	0.595385	1.02012	1.01651	0.0709359	0.180335		1.00413	0.680348	0.993785	1.00151	0.126346	0.0143268		0.912883	0.0462355	0.0462355	0.914469	0.014701	0.0448244
0.1923	1.0148	0.595067	1.02047	1.01646	0.0707712	0.180286		1.00532	0.680125	0.994679	1.00163	0.125902	0.0143268		0.912815	0.0460327	0.0458974	0.912672	0.0147866	0.0449955
0.1933	1.01565	0.593848	1.0216	1.01651	0.0707712	0.180187		1.00577	0.680014	0.995238	1.00174	0.125902	0.0135496		0.912475	0.0463031	0.0461002	0.909758	0.0144443	0.0453378
0.1943	1.0157	0.593106	1.02217	1.01665	0.0706065	0.179742		1.00502	0.681799	0.994232	1.00185	0.125902	0.0126614		0.912747	0.046506	0.0461679	0.909844	0.0146154	0.0448244
0.1953	1.01602	0.592682	1.02237	1.01695	0.0714301	0.179248		1.00383	0.681799	0.993117	1.00185	0.125902	0.0127725		0.91329	0.0463707	0.0463031	0.911297	0.0146154	0.0443965
0.1963	1.01581	0.592947	1.02259	1.01676	0.0720066	0.179446		1.00279	0.682357	0.992336	1.00174	0.127123	0.0131055		0.912747	0.0464383	0.0463031	0.912586	0.014701	0.0449099
0.1973	1.01559	0.59353	1.02252	1.0168	0.073242	0.179495		1.0022	0.683361	0.991889	1.00196	0.129565	0.0129945		0.912611	0.046506	0.0461679	0.911984	0.0143587	0.0447388
0.1983	1.0157	0.593954	1.02308	1.017	0.0734479	0.179198		1.00115	0.68258	0.991777	1.0014	0.132785	0.0131055		0.912204	0.0465059	0.0461002	0.910016	0.0143587	0.0449099
0.1993	1.01644	0.593742	1.02386	1.01671	0.073242	0.178952		1.00086	0.682804	0.991777	1.00218	0.136781	0.0128835		0.911191	0.0465736	0.0463707	0.909242	0.014701	0.0445677
0.2003	1.01708	0.592682	1.02421	1.017	0.0734479	0.178804		1.00056	0.681353	0.99133	1.00285	0.136781	0.0127725		0.910043	0.0463707	0.0462355	0.908984	0.0146154	0.0446532
0.2013	1.01734	0.592205	1.02428	1.017	0.0737362	0.1791		1.00086	0.680459	0.991442	1.00374	0.134672	0.0126615		0.908759	0.046506	0.0461002	0.908648	0.0144442	0.0445677
0.2023	1.01771	0.592417	1.02428	1.017	0.0732008	0.179396		1.0016	0.680236	0.992111	1.0044	0.132563	0.0125504		0.907809	0.0464383	0.0462355	0.908305	0.0147866	0.0446532
0.2033	1.01803	0.592894	1.0245	1.0175	0.0726243	0.179495		1.0016	0.679902	0.992558	1.00496	0.132008	0.0133276		0.907944	0.0465736	0.0463707	0.906937	0.0147866	0.0445677
0.2043	1.01819	0.59406	1.02492	1.01838	0.0724184	0.179644		1.00175	0.681799	0.992223	1.00407	0.13223	0.0142157		0.908148	0.0463707	0.0463031	0.90668	0.0147866	0.0445677
0.2053	1.01787	0.594378	1.0245	1.01838	0.0732008	0.179594		1.00309	0.682023	0.993563	1.0034	0.131786	0.0132166		0.90842	0.0461002	0.0460327	0.905305	0.0145298	0.0448244
0.2063	1.01782	0.59406	1.02464	1.01903	0.0731596	0.179742		1.00502	0.682693	0.994902	1.00262	0.131009	0.0131055		0.908691	0.0461002	0.0456946	0.905992	0.0143587	0.0448244
0.2073	1.01792	0.594007	1.02471	1.01977	0.0720889	0.179644		1.00487	0.681799	0.995349	1.00318	0.13112	0.0129945		0.908556	0.0460327	0.0460327	0.907023	0.0143587	0.0447388
0.2083	1.01745	0.594484	1.02421	1.01967	0.0716359	0.179396		1.00458	0.68258	0.995461	1.00385	0.13445	0.0132166		0.908827	0.0462355	0.045965	0.908305	0.0140163	0.0448244
0.2093	1.01766	0.594696	1.02428	1.01942	0.0711006	0.178655		1.00487	0.682246	0.995683	1.00396	0.135116	0.0128835		0.909031	0.0464383	0.0461679	0.910531	0.0140163	0.0447388
0.2103	1.01803	0.594855	1.02485	1.01977	0.0730361	0.177815		1.00577	0.68325	0.99613	1.00407	0.138114	0.0132166		0.909296	0.046506	0.0461679	0.909672	0.0143587	0.0449099
0.2113	1.01803	0.594166	1.02478	1.02036	0.0746009	0.177667		1.00577	0.683586	0.995906	1.0034	0.144886	0.0123284		0.910111	0.0464383	0.0463031	0.907531	0.0144442	0.0450811
0.2123	1.0184	0.593636	1.02428	1.02066	0.0754654	0.177123		1.00562	0.68191	0.995461	1.00218	0.146441	0.0123284		0.910043	0.0461678	0.0460327	0.90668	0.0145298	0.0451666
0.2133	1.0184	0.593954	1.02471	1.0212	0.0743538	0.177173		1.00383	0.681353	0.994121	1.00174	0.142666	0.0118843		0.909907	0.0462355	0.045965	0.905477	0.014701	0.0447388
0.2143	1.01893	0.594749	1.02514	1.02115	0.073695	0.17742		1.00294	0.682693	0.993563	1.00262	0.138447	0.0128835		0.909907	0.0463707	0.045965	0.904109	0.0146154	0.0445677
0.2153	1.01952	0.595703	1.02521	1.02115	0.0734068	0.177519		1.00339	0.685148	0.993563	1.00374	0.13445	0.0129945		0.909636	0.0464383	0.0460327	0.902484	0.0146154	0.044482
0.2163	1.02026	0.596869	1.02584	1.01992	0.0732832	0.178161		1.00294	0.685818	0.993228	1.00318	0.130231	0.0127725		0.909907	0.0461002	0.0461002	0.903258	0.0143587	0.0447388
0.2173	1.02079	0.597611	1.02669	1.01977	0.0730361	0.178309		1.00145	0.685148	0.992334	1.00196	0.128899	0.0127725		0.909975	0.0463031	0.0461002	0.904969	0.0143587	0.0447388
0.2183	1.02084	0.596975	1.02683	1.02086	0.0731185	0.177667		1.00145	0.683361	0.992447	1.00151	0.126901	0.0133276		0.909432	0.046506	0.0461002	0.907359	0.0147866	0.0443965
0.2193	1.02052	0.595968	1.02683	1.02214	0.0733244	0.177667		1.00175	0.683586	0.992558	1.00151	0.126346	0.0143268		0.908895	0.0464383	0.0461679	0.906852	0.0150433	0.0445677
0.2203	1.02021	0.595226	1.02683	1.02293	0.0746421	0.178408		1.0016	0.683139	0.992447	1.00207	0.124791	0.0144378		0.908759	0.0465736	0.0463031	0.906078	0.0149577	0.0443965
0.2213	1.02115	0.595014	1.02732	1.02293	0.0740656	0.178507		1.00249	0.683474	0.99267	1.00218	0.125791	0.0132165		0.908895	0.0465736	0.0463031	0.90625	0.0144442	0.0443109
0.2223	1.02275	0.594749	1.02881	1.02264	0.0733656	0.178606		1.00175	0.681688	0.992558	1.00174	0.126901	0.0123284		0.909031	0.0466412	0.046506	0.906078	0.0144442	0.0443965
0.2233	1.02375	0.594749	1.02987	1.02244	0.0727478	0.178655		1.00249	0.681353	0.992558	1.0024	0.128566	0.0108851		0.908623	0.0467088	0.046506	0.908477	0.0143587	0.0448244
0.2243	1.02418	0.594908	1.0305	1.02298	0.0710183	0.178309		1.00353	0.681129	0.993228	1.00307	0.128122	0.0115513		0.908556	0.0467088	0.046506	0.911641	0.0144442	0.0449955
0.2253	1.02381	0.595385	1.03001	1.02347	0.0698653	0.178853		1.00353	0.681912	0.993898	1.00185	0.129121	0.0124394		0.908556	0.0467088	0.0466412	0.911555	0.014701	0.0449099
0.2263	1.02237	0.59565	1.02916	1.02382	0.0698241	0.179446		1.00398	0.682469	0.99401	1.00207	0.127789	0.0142158		0.908691	0.0468441	0.0463707	0.910617	0.0144442	0.0446532
0.2273	1.02217	0.596392	1.02866	1.02392	0.0713065	0.178804		1.00458	0.68392	0.994791	1.00262	0.128566	0.015437		0.908488	0.0467088	0.0463707	0.9095	0.0146154	0.0449099
0.2283	1.0219	0.59671	1.02825	1.02382	0.0724595	0.178013		1.00458	0.686152	0.995014	1.00385	0.129898	0.0147708		0.907944	0.0465736	0.0463707	0.911297	0.0146154	0.0445677
0.2293	1.02137	0.597929	1.02825	1.02412	0.0733656	0.17915		1.00577	0.686599	0.995683	1.00496	0.133451	0.0128835		0.90808	0.0465736	0.0464383	0.913781	0.0144442	0.0446532
0.2303	1.0211	0.598989	1.02838	1.02377	0.074148	0.180039		1.00517	0.686711	0.994902	1.00451	0.132896	0.0131056		0.907809	0.0467088	0.0461678	0.915922	0.014701	0.0443109
0.2313	1.02185	0.599307	1.02909	1.02382	0.0752188	0.179742		1.00428	0.686488	0.994679	1.00285	0.131231	0.0126614		0.907877	0.046506	0.0462355	0.915836	0.0147866	0.0443109
0.2323	1.02259	0.599731	1.02987	1.02422	0.0744774	0.179693		1.00353	0.686599	0.994121	1.0024	0.129787	0.0132166		0.908284	0.0465736	0.0463031	0.913953	0.0145298	0.044482
0.2333	1.02264	0.599625	1.03008	1.02451	0.0739009	0.179644		1.00294	0.68526	0.993228	1.00251	0.129787	0.0135496		0.908623	0.0468441	0.0465736	0.912836	0.0145298	0.044482
0.2343	1.02317	0.598936	1.03001	1.02447	0.0733656	0.180187		1.0016	0.686264	0.992334	1.00229	0.131009	0.0142157		0.9095	0.0469793	0.0465736	0.910531	0.0145298	0.044482
0.2353	1.02375	0.598035	1.03043	1.02456	0.072789	0.180039		1.00145	0.687269	0.992893	1.00229	0.131897	0.0147708		0.909772	0.0469117	0.046506	0.908133	0.0146154	0.044482
0.2363	1.02392	0.5983	1.03043	1.02481	0.0729538	0.179544		1.0016	0.687827	0.992558	1.00251	0.133229	0.0148819		0.910247	0.0468441	0.0464383	0.907445	0.0146154	0.044482
0.2373	1.02434	0.598565	1.03036	1.02545	0.0726243	0.179495		1.00264	0.686933	0.993117	1.0024	0.130454	0.0146599		0.909772	0.0467088	0.0465736	0.907789	0.0151289	0.0448244
0.2383	1.02439	0.597982	1.03036	1.0256	0.0719242	0.178556		1.00428	0.687492	0.993898	1.00251	0.129343	0.0154369		0.910383	0.046506	0.0465736	0.909156	0.0149577	0.0441398
0.2393	1.02418	0.59724	1.03036	1.02555	0.0726655	0.17826		1.00398	0.686599	0.993898	1.00207	0.127234	0.0148819		0.910519	0.0466412	0.0466412	0.910102	0.0148721	0.0443109
0.2403	1.02445	0.596657	1.03093	1.02545	0.0731596	0.178211		1.00309	0.687046	0.993004	1.00262	0.122904	0.0137716		0.910648	0.0467088	0.046506	0.911727	0.0150433	0.0446532
0.2413	1.02455	0.596604	1.03135	1.02516	0.0729126	0.17742		1.00234	0.686152	0.992781	1.0024	0.122793	0.0144378		0.909636	0.0467088	0.046506	0.913609	0.0151289	0.0448244
0.2423	1.02471	0.596551	1.03156	1.026	0.0727067	0.176876		1.00145	0.686041	0.991777	1.00185	0.123903	0.0149928		0.909364	0.0467088	0.0462355	0.915063	0.0148721	0.0442253
0.2433	1.02455	0.596763	1.03128	1.02723	0.0728714	0.176234		1.00026	0.686265	0.990326	1.0024	0.123681	0.0152149		0.909432	0.0465736	0.0463031	0.915578	0.014701	0.0442253
0.2443	1.02445	0.597929	1.03149	1.02728	0.0734891	0.176382		1.00026	0.686041	0.990437	1.00251	0.125902	0.015437		0.909093	0.046506	0.0461679	0.916352	0.0148721	0.0443965
0.2453	1.02487	0.597134	1.03177	1.02733	0.072995	0.176679		1.001	0.685148	0.991889	1.00229	0.1279	0.0149928		0.908759	0.0464383	0.0463031	0.915492	0.0149577	0.0446532
0.2463	1.02598	0.597134	1.03298	1.02728	0.0728714	0.178013		1.00175	0.68392	0.993004	1.00218	0.130009	0.0143268		0.909228	0.0462355	0.045965	0.913523	0.0146154	0.0445677
0.2473	1.02656	0.597717	1.03354	1.02723	0.0735302	0.178458		1.00324	0.682246	0.993674	1.00274	0.13223	0.0149928		0.909636	0.0462355	0.0461679	0.911469	0.0147866	0.0449955
0.2483	1.02672	0.597664	1.03361	1.02777	0.0739009	0.178161		1.00309	0.680572	0.993563	1.0034	0.132119	0.0152149		0.910519	0.0461002	0.0458974	0.912242	0.0151289	0.0447388
0.2493	1.02694	0.597664	1.03354	1.02847	0.0737362	0.178556		1.0019	0.680572	0.992558	1.0034	0.131786	0.0158811		0.911463	0.0463031	0.0461002	0.915578	0.0147866	0.0446532
0.2503	1.0272	0.597876	1.0334	1.02891	0.0737362	0.178754		1.00205	0.682469	0.992893	1.00362	0.127789	0.015548		0.911531	0.046506	0.0460327	0.917375	0.0149577	0.0448244
0.2513	1.02736	0.598247	1.03368	1.02852	0.0726655	0.178804		1.00353	0.684701	0.994121	1.00285	0.122016	0.0148819		0.911667	0.0465736	0.0463707	0.918484	0.0148721	0.0449955
0.2523	1.02741	0.598512	1.03333	1.02837	0.0721302	0.17826		1.00473	0.685595	0.994791	1.00262	0.121239	0.0148819		0.912747	0.0465736	0.0463707	0.917977	0.0148721	0.0449099
0.2533	1.02672	0.598618	1.03312	1.02877	0.0726243	0.177667		1.00458	0.685818	0.994344	1.00207	0.124125	0.0149928		0.912815	0.0464383	0.0461679	0.917805	0.0146154	0.0447388
0.2543	1.02656	0.598777	1.03347	1.02852	0.0732008	0.177815		1.00383	0.686488	0.99401	1.00096	0.126457	0.0144378		0.913488	0.0464383	0.0462355	0.917633	0.0143587	0.0448244
0.2553	1.02672	0.598936	1.03326	1.02832	0.0730773	0.178062		1.00353	0.686152	0.992558	0.999405	0.128677	0.0144378		0.914099	0.046506	0.0461679	0.916602	0.0144442	0.0447388
0.2563	1.02656	0.598194	1.03354	1.02886	0.072336	0.178211		1.00324	0.68392	0.992447	0.999405	0.130675	0.0139936		0.914438	0.046506	0.0463031	0.915664	0.0145298	0.0449099
0.2573	1.02672	0.597876	1.03383	1.02975	0.0732008	0.178062		1.00249	0.680348	0.991889	0.999627	0.129898	0.0136607		0.915043	0.0467764	0.046506	0.914383	0.0144442	0.0449099
0.2583	1.02704	0.597823	1.03383	1.03015	0.0741892	0.178705		1.00249	0.677334	0.992	1.00007	0.131897	0.0138827		0.915383	0.046844	0.0466412	0.914555	0.0146154	0.0445677
0.2593	1.02757	0.598777	1.03432	1.03059	0.0749304	0.178902		1.00368	0.675549	0.993563	1.00085	0.134339	0.0142158		0.91471	0.0467088	0.046506	0.915406	0.0146154	0.0441398
0.2603	1.02784	0.599678	1.03411	1.03074	0.074848	0.178161		1.00324	0.675213	0.994121	1.00107	0.137115	0.0147708		0.913691	0.0465736	0.0463031	0.916602	0.014701	0.0441398
0.2613	1.02794	0.600103	1.03361	1.0298	0.0741068	0.177963		1.00205	0.675995	0.993004	1.00029	0.134561	0.0145488		0.914778	0.0464383	0.0463031	0.917031	0.0145298	0.0445677
0.2623	1.02815	0.599837	1.03439	1.02956	0.0733656	0.178408		1.00145	0.677111	0.992223	0.999961	0.132896	0.0151039		0.916599	0.0465736	0.046506	0.916773	0.0147866	0.0445677
0.2633	1.02842	0.599785	1.03481	1.0298	0.0731185	0.178458		1.00041	0.680125	0.991777	0.999516	0.132785	0.0151039		0.917414	0.0467764	0.046506	0.916266	0.0145298	0.0449955
0.2643	1.02868	0.599042	1.03552	1.02956	0.0730773	0.178507		0.999367	0.680459	0.990549	1.00029	0.132896	0.0151039		0.918562	0.0466412	0.0465736	0.915492	0.0144442	0.0449099
0.2653	1.02906	0.598725	1.03588	1.0296	0.073242	0.178902		0.999516	0.680125	0.989656	0.999182	0.134006	0.0152149		0.91829	0.046506	0.0464383	0.917461	0.0147866	0.0448244
0.2663	1.02921	0.599572	1.03644	1.0302	0.0734068	0.17915		1.00011	0.679232	0.989879	0.998073	0.134672	0.0156589		0.916938	0.046506	0.0462355	0.920031	0.0148721	0.0451666
0.2673	1.02937	0.599572	1.03679	1.03123	0.0732832	0.179248		0.999962	0.678785	0.990437	0.998518	0.136781	0.015548		0.916401	0.0463031	0.0460327	0.921828	0.014701	0.0453378
0.2683	1.02948	0.599042	1.03623	1.03178	0.0720477	0.179347		1.00115	0.678562	0.991666	0.998961	0.139224	0.01577		0.915722	0.0463707	0.0461679	0.924047	0.014701	0.0448244
0.2693	1.02937	0.599731	1.03552	1.03202	0.0725831	0.179594		1.00086	0.679344	0.991107	0.998961	0.138447	0.0158811		0.91579	0.0461679	0.0461002	0.925078	0.014701	0.0448244
0.2703	1.02916	0.599837	1.03559	1.03208	0.0732832	0.179841		1.00115	0.678785	0.990996	0.998961	0.13978	0.0152149		0.915654	0.046506	0.0464383	0.925594	0.0145298	0.0442253
0.2713	1.0289	0.599678	1.03545	1.03208	0.0751362	0.179545		1.00026	0.678785	0.990996	0.999516	0.143776	0.0147708		0.91579	0.0465736	0.0466412	0.923797	0.0147866	0.0442253
0.2723	1.02874	0.600102	1.03559	1.03173	0.0769068	0.178655		0.998921	0.679232	0.99066	0.999738	0.143997	0.0142157		0.916735	0.0467088	0.0465736	0.921227	0.014701	0.0443109
0.2733	1.02885	0.599996	1.03559	1.03084	0.0767835	0.17826		0.998474	0.678451	0.990772	1.00085	0.13878	0.0134386		0.917142	0.0469117	0.0466412	0.920031	0.0143587	0.0443965
0.2743	1.02926	0.599996	1.03595	1.03059	0.0767835	0.178062		0.998772	0.677557	0.990549	1.00063	0.136338	0.0118843		0.91829	0.0467088	0.0465736	0.918742	0.0143587	0.044482
0.2753	1.03059	0.599572	1.03708	1.03059	0.0762481	0.17905		0.999516	0.67834	0.990215	0.999738	0.134561	0.0122174		0.920926	0.0465736	0.046506	0.916266	0.014701	0.044482
0.2763	1.03165	0.600474	1.03792	1.03094	0.0746422	0.179495		1.001	0.680459	0.99066	0.999182	0.133007	0.0127725		0.922481	0.0464383	0.0463707	0.915922	0.0151289	0.0449099
0.2773	1.0317	0.600474	1.03821	1.03267	0.0737774	0.179644		1.0022	0.682804	0.990996	1.00029	0.131897	0.0139936		0.921401	0.0465736	0.0463031	0.916602	0.0146154	0.0452523
0.2783	1.03102	0.600738	1.03743	1.03371	0.0734479	0.17994		1.0019	0.685037	0.990883	1.00085	0.128344	0.0143268		0.918765	0.0464383	0.0461679	0.917375	0.0144442	0.0451666
0.2793	1.03081	0.600155	1.03764	1.03375	0.0719654	0.179396		1.00086	0.684925	0.990326	1.00007	0.127567	0.0138827		0.918086	0.0465736	0.0463707	0.917547	0.0142731	0.0450811
0.2803	1.03075	0.599785	1.03764	1.03336	0.0712653	0.178754		1.00026	0.684925	0.990437	1.00029	0.129565	0.0131056		0.918765	0.0466412	0.0463707	0.918742	0.0143587	0.0453378
0.2813	1.03012	0.599943	1.03672	1.03375	0.0723361	0.178309		0.999664	0.683474	0.98999	1.00174	0.133895	0.0136607		0.918698	0.0467088	0.046506	0.920281	0.014102	0.0452523
0.2823	1.0307	0.599837	1.03708	1.03371	0.0755481	0.178161		0.998474	0.682804	0.988539	1.00151	0.135782	0.0134386		0.91863	0.0467764	0.0465736	0.922164	0.0147866	0.0453378
0.2833	1.0317	0.59936	1.03877	1.03415	0.0763308	0.177914		0.997135	0.683697	0.987424	1.00163	0.133673	0.0126615		0.919309	0.0469793	0.0465736	0.922508	0.0146154	0.0453378
0.2843	1.03271	0.598989	1.03976	1.0344	0.0742715	0.177074		0.997135	0.686376	0.987088	0.999627	0.132452	0.0132166		0.918833	0.0468441	0.0466412	0.920797	0.0148721	0.0449955
0.2853	1.03308	0.598989	1.03969	1.03425	0.0739421	0.176432		0.997432	0.687492	0.988094	0.998073	0.130342	0.0137716		0.91863	0.046844	0.0465736	0.917891	0.0149577	0.0445677
0.2863	1.03303	0.59936	1.03934	1.03479	0.0732008	0.176283		0.998325	0.687603	0.988651	0.997518	0.129343	0.0132166		0.918698	0.0468441	0.0463707	0.916859	0.0147866	0.0445676
0.2873	1.03282	0.599837	1.03892	1.03534	0.0736126	0.175592		0.999069	0.686376	0.989656	0.997962	0.128233	0.0132166		0.91829	0.0465736	0.0463707	0.917805	0.0148721	0.0443109
0.2883	1.03287	0.600208	1.03899	1.03603	0.0745598	0.17574		0.999367	0.683474	0.989768	0.99885	0.12901	0.0125504		0.91863	0.046506	0.0461679	0.920281	0.0146154	0.0443965
0.2893	1.03303	0.599201	1.03934	1.03638	0.0757955	0.175542		1.00011	0.681688	0.989768	0.998961	0.129232	0.0129945		0.918765	0.0462355	0.0460327	0.921914	0.0148721	0.0446532
0.2903	1.03314	0.597982	1.03941	1.03617	0.0771128	0.175938		1.00026	0.679121	0.990549	0.998518	0.126679	0.0135496		0.920321	0.0463707	0.045965	0.923109	0.0147866	0.0448244
0.2913	1.03266	0.598618	1.03877	1.03598	0.0782662	0.176135		0.999069	0.67834	0.989879	0.997962	0.126901	0.0132166		0.921265	0.0463707	0.0463031	0.924562	0.0147866	0.044482
0.2923	1.03266	0.599572	1.03899	1.03667	0.0790075	0.176481		0.998474	0.678785	0.989321	0.997074	0.127567	0.0145488		0.922148	0.0465736	0.0463031	0.924906	0.0147866	0.044482
0.2933	1.03325	0.600208	1.03941	1.03746	0.0783075	0.177469		0.998921	0.679678	0.989432	0.996297	0.128122	0.0144378		0.920457	0.0465736	0.0463707	0.924562	0.0146154	0.0445677
0.2943	1.0334	0.599943	1.03912	1.03746	0.0764541	0.177765		0.998624	0.682135	0.989321	0.997407	0.129787	0.0146599		0.918833	0.0466412	0.0463031	0.924992	0.014701	0.0445677
0.2953	1.03325	0.599731	1.03926	1.03686	0.0746009	0.178161		0.997879	0.684144	0.988205	0.997628	0.130231	0.0143268		0.918969	0.0465736	0.0463707	0.925078	0.0151289	0.0445677
0.2963	1.03335	0.59989	1.03926	1.03638	0.0734067	0.178952		0.997879	0.68258	0.987535	0.997518	0.129121	0.0144378		0.920049	0.0466412	0.0463707	0.925422	0.0146154	0.0447388
0.2973	1.03335	0.600261	1.03955	1.03642	0.0725832	0.178161		0.998624	0.681242	0.987758	0.997851	0.130009	0.0133276		0.920185	0.0465736	0.0463031	0.925078	0.0148721	0.0448244
0.2983	1.03404	0.600738	1.03997	1.03686	0.0725008	0.177568		0.999219	0.680014	0.988317	0.997741	0.129787	0.0133276		0.920321	0.0466412	0.0462355	0.925594	0.0145298	0.0449099
0.2993	1.03425	0.601056	1.04033	1.03732	0.0728302	0.177667		0.998177	0.680125	0.98787	0.997851	0.13112	0.0136607		0.920926	0.0467088	0.0464383	0.927984	0.0142731	0.0449955
0.3003	1.03499	0.600314	1.04103	1.03692	0.0741892	0.177371		0.997582	0.678674	0.987424	0.998405	0.131897	0.0139936		0.922617	0.0467088	0.0466412	0.92893	0.0145298	0.0449955
0.3013	1.03547	0.600579	1.04195	1.03697	0.0737362	0.177074		0.997432	0.676442	0.986865	0.998405	0.134228	0.0134386		0.924173	0.0466412	0.0464383	0.927477	0.0143587	0.0449955
0.3023	1.03541	0.601586	1.04266	1.03707	0.0739421	0.176975		0.997284	0.675213	0.98653	0.999072	0.134783	0.0132166		0.924784	0.0465736	0.0462355	0.926188	0.0144442	0.0450811
0.3033	1.03531	0.601215	1.04252	1.0378	0.0737774	0.177667		0.996539	0.675549	0.986084	0.998961	0.134561	0.0136607		0.924309	0.0466412	0.046506	0.921992	0.0143587	0.0449955
0.3043	1.03499	0.600897	1.0423	1.03751	0.0739421	0.178656		0.995944	0.676106	0.98508	0.998295	0.133784	0.0144378		0.922957	0.0467088	0.0463031	0.921055	0.0144442	0.0449955
0.3053	1.03499	0.601109	1.04252	1.03786	0.0733656	0.17905		0.994753	0.675102	0.984075	0.997296	0.131453	0.0161031		0.922889	0.0464383	0.0463707	0.922422	0.0147866	0.0449099
0.3063	1.03521	0.600792	1.04217	1.03835	0.0731185	0.178804		0.99386	0.67499	0.984186	0.995853	0.130786	0.01577		0.92316	0.0463031	0.0460327	0.923109	0.014701	0.0451666
0.3073	1.0351	0.60042	1.04223	1.0383	0.0729126	0.178556		0.993265	0.676442	0.983852	0.995631	0.131231	0.0153259		0.923025	0.046506	0.0461679	0.923875	0.0146154	0.0449099
0.3083	1.03541	0.600685	1.04252	1.03795	0.0732008	0.177321		0.994158	0.678004	0.984186	0.995297	0.13112	0.0147708		0.922481	0.0465736	0.0463031	0.925422	0.0145298	0.0449099
0.3093	1.0361	0.600738	1.04351	1.03776	0.0733244	0.176777		0.995052	0.677446	0.984967	0.995297	0.131453	0.0139936		0.922617	0.0465736	0.0462355	0.926016	0.0144442	0.0450811
0.3103	1.03632	0.600685	1.04351	1.03805	0.0743539	0.176728		0.994753	0.677557	0.984856	0.995519	0.134228	0.0126615		0.922821	0.046506	0.0461679	0.925422	0.0144442	0.0451666
0.3113	1.0361	0.600314	1.04315	1.0382	0.0753421	0.176827		0.994307	0.67834	0.984075	0.995519	0.128899	0.0124394		0.923568	0.0463707	0.0461679	0.92525	0.0144442	0.0446532
0.3123	1.03643	0.600102	1.04337	1.03786	0.0747657	0.176777		0.994605	0.679678	0.983852	0.994631	0.126013	0.0126615		0.924309	0.0466412	0.0463031	0.926703	0.0141875	0.044482
0.3133	1.03637	0.599996	1.04294	1.0378	0.0744362	0.177271		0.995349	0.679008	0.98441	0.995964	0.126013	0.0141047		0.924716	0.0464383	0.0463707	0.927641	0.0141875	0.0443109
0.3143	1.03579	0.600208	1.04237	1.0387	0.0745598	0.177765		0.9952	0.677893	0.984186	0.996297	0.12679	0.01577		0.92566	0.0464383	0.0461679	0.927305	0.0145298	0.0446532
0.3153	1.03605	0.600155	1.04252	1.03914	0.0748068	0.177321		0.993712	0.67767	0.98374	0.995964	0.128566	0.0161031		0.926611	0.0465736	0.0463031	0.926703	0.0146154	0.044482
0.3163	1.03626	0.600792	1.04308	1.03909	0.0736126	0.176876		0.993712	0.678004	0.983628	0.996074	0.12901	0.015548		0.927827	0.0465736	0.0461679	0.924477	0.0151289	0.0448244
0.3173	1.03679	0.601534	1.04407	1.03964	0.0731185	0.175838		0.993414	0.67767	0.983405	0.994965	0.131453	0.0147708		0.92816	0.0464383	0.0463031	0.924477	0.0149577	0.0449955
0.3183	1.03685	0.601534	1.044	1.03929	0.0722125	0.17574		0.993712	0.677781	0.983293	0.995186	0.134672	0.0139936		0.927963	0.0465736	0.0463707	0.923961	0.014701	0.0450811
0.3193	1.03701	0.602063	1.04372	1.03899	0.0731185	0.176086		0.992818	0.677	0.982401	0.995853	0.13667	0.0136607		0.927148	0.0466412	0.0464383	0.92268	0.0145298	0.0449099
0.3203	1.03643	0.602805	1.04337	1.03914	0.073695	0.176629		0.99133	0.675438	0.98162	0.996185	0.135672	0.0133276		0.926	0.0465736	0.0463707	0.923281	0.0150433	0.0453378
0.3213	1.03615	0.603759	1.04323	1.03944	0.072789	0.176876		0.990735	0.674655	0.981731	0.996297	0.131786	0.0137716		0.925932	0.046844	0.046506	0.923961	0.0147866	0.0451666
0.3223	1.03643	0.603812	1.04294	1.03953	0.0713477	0.176777		0.991033	0.672981	0.982289	0.995631	0.131453	0.0146599		0.925191	0.046844	0.046506	0.92482	0.0146154	0.0452523
0.3233	1.03706	0.603866	1.04337	1.03998	0.0718008	0.176629		0.990735	0.674768	0.981842	0.996185	0.130897	0.0152149		0.923833	0.0468441	0.0464383	0.926016	0.014701	0.0453378
0.3243	1.03817	0.602859	1.04478	1.04008	0.0729126	0.17658		0.991182	0.67499	0.982065	0.995186	0.130231	0.0137716		0.923025	0.046506	0.0461002	0.927219	0.0145298	0.0451666
0.3253	1.03849	0.602116	1.04485	1.04003	0.0743127	0.177271		0.991925	0.67499	0.982065	0.993854	0.13012	0.0139936		0.924444	0.0469117	0.0464383	0.926188	0.0145298	0.0448244
0.3263	1.03828	0.601852	1.04485	1.04013	0.0752602	0.178211		0.993117	0.674879	0.982512	0.993632	0.13012	0.0135496		0.925321	0.046844	0.0466412	0.925594	0.0142731	0.0447388
0.3273	1.03806	0.601481	1.04464	1.04038	0.0746009	0.178211		0.99267	0.675772	0.982512	0.992745	0.12901	0.0138827		0.92566	0.0469117	0.0464383	0.925844	0.0140164	0.0448244
0.3283	1.03801	0.601586	1.04492	1.03993	0.0741892	0.178062		0.991777	0.677	0.981507	0.992966	0.124347	0.0142158		0.926204	0.0466412	0.0466412	0.923961	0.0144442	0.044482
0.3293	1.03838	0.601056	1.04555	1.04033	0.0747656	0.178112		0.992075	0.676553	0.981842	0.992189	0.12135	0.0144378		0.926877	0.0465736	0.046506	0.922336	0.0146154	0.0442253
0.3303	1.0387	0.600791	1.04612	1.04147	0.0763308	0.178507		0.992819	0.677223	0.982846	0.9923	0.11702	0.0146599		0.927352	0.046506	0.0464383	0.922508	0.0143587	0.0448244
0.3313	1.03892	0.601109	1.04612	1.04245	0.0761248	0.178853		0.992223	0.677446	0.982401	0.992522	0.114689	0.0147708		0.927827	0.0466412	0.0462355	0.924648	0.0141875	0.0449099
0.3323	1.03854	0.601056	1.0457	1.04299	0.0747656	0.178507		0.992075	0.678562	0.982289	0.991301	0.116798	0.0143268		0.92816	0.0466412	0.0461679	0.926016	0.0142731	0.0449099
0.3333	1.03785	0.600845	1.04521	1.04245	0.0741068	0.177617		0.990288	0.680683	0.981508	0.990191	0.120462	0.0126615		0.927352	0.0464383	0.0461679	0.927562	0.0143587	0.0450811
0.3343	1.03785	0.600102	1.04506	1.04216	0.0735714	0.176629		0.989395	0.680236	0.981284	0.990412	0.124014	0.0128835		0.926877	0.0466412	0.0464383	0.930211	0.0141875	0.0452523
0.3353	1.03833	0.599943	1.04527	1.04245	0.0737362	0.176629		0.990288	0.67834	0.981284	0.991523	0.126679	0.0137716		0.927148	0.0467764	0.0463707	0.93132	0.0142731	0.0453378
0.3363	1.03897	0.600208	1.04605	1.04329	0.0738597	0.177123		0.99014	0.677	0.981173	0.991412	0.129121	0.0139936		0.928296	0.0465736	0.0463031	0.931156	0.0148721	0.045509
0.3373	1.03981	0.601534	1.04704	1.04299	0.0733656	0.177222		0.989842	0.675883	0.980503	0.990857	0.129343	0.0139936		0.928907	0.0466412	0.0466412	0.929953	0.0146154	0.045509
0.3383	1.04029	0.602434	1.04775	1.04285	0.072789	0.176481		0.98999	0.675995	0.980726	0.990857	0.128011	0.0141047		0.928772	0.0469793	0.0467088	0.928758	0.0149577	0.0448244
0.3393	1.04003	0.603176	1.04725	1.04265	0.0725832	0.176679		0.990437	0.677	0.981061	0.991523	0.127345	0.0145488		0.927284	0.0471821	0.0469117	0.926531	0.0152145	0.0445677
0.3403	1.04003	0.602541	1.04655	1.0425	0.0732832	0.177025		0.989545	0.677557	0.980503	0.991412	0.128455	0.0145488		0.926068	0.0470469	0.0469793	0.925508	0.0151289	0.0443965
0.3413	1.03966	0.602381	1.04563	1.0426	0.073695	0.178211		0.989395	0.67767	0.980168	0.991634	0.13012	0.01577		0.926204	0.0467088	0.0465736	0.926188	0.0148721	0.044482
0.3423	1.03934	0.602858	1.04521	1.04275	0.0730361	0.178804		0.989545	0.676776	0.97961	0.989969	0.131009	0.0168801		0.927148	0.0467088	0.046506	0.927047	0.014701	0.044482
0.3433	1.03928	0.602646	1.04534	1.04398	0.0727067	0.178507		0.989842	0.676553	0.979721	0.989746	0.129121	0.0167692		0.927759	0.0468441	0.046506	0.928586	0.014701	0.0445677
0.3443	1.03976	0.602116	1.04584	1.04468	0.0725008	0.177865		0.990735	0.677111	0.980614	0.989192	0.129454	0.0161031		0.928907	0.0470469	0.0467764	0.929867	0.0148721	0.0448244
0.3453	1.04055	0.601957	1.04676	1.04428	0.0728714	0.178062		0.990437	0.677781	0.980391	0.989303	0.130786	0.0167692		0.929988	0.0469793	0.0467764	0.92807	0.0147866	0.0443965
0.3463	1.04098	0.60201	1.04761	1.04403	0.0725008	0.1791		0.99133	0.677893	0.981284	0.98908	0.132563	0.0167692		0.930531	0.0467764	0.0465736	0.926273	0.0149577	0.0449099
0.3473	1.04098	0.60201	1.04796	1.04295	0.0734478	0.179544		0.99267	0.676776	0.982401	0.989414	0.132341	0.015548		0.930735	0.046506	0.0464383	0.927391	0.0147866	0.0449099
0.3483	1.04003	0.603123	1.04683	1.04289	0.0736126	0.178754		0.992967	0.67633	0.982065	0.990191	0.133229	0.0146599		0.930395	0.0467088	0.0463707	0.927984	0.0145298	0.0448244
0.3493	1.03934	0.603017	1.04626	1.04265	0.0741068	0.178853		0.992075	0.676889	0.981731	0.990857	0.133451	0.0137716		0.930191	0.0465736	0.0462355	0.92807	0.0149577	0.0446532
0.3503	1.03945	0.602381	1.04641	1.04235	0.0751774	0.178754		0.99014	0.675438	0.979944	0.990191	0.125236	0.0141047		0.929586	0.0467088	0.0463707	0.926875	0.0146154	0.0445677
0.3513	1.03939	0.601798	1.04634	1.04275	0.0753008	0.1791		0.988948	0.675325	0.97894	0.989303	0.117464	0.0141047		0.929179	0.0468441	0.046506	0.927219	0.0148721	0.0445677
0.3523	1.03912	0.601957	1.04612	1.04305	0.0758361	0.179446		0.989395	0.676442	0.979499	0.988192	0.116354	0.0137716		0.929383	0.0467088	0.046506	0.928328	0.0149577	0.0446532
0.3533	1.03902	0.602434	1.04591	1.04374	0.0758774	0.178754		0.989247	0.676889	0.978829	0.988636	0.118019	0.0132166		0.929648	0.0464383	0.0464383	0.930297	0.0148721	0.0449099
0.3543	1.03892	0.602752	1.04584	1.04359	0.0739008	0.178656		0.989247	0.677111	0.979163	0.988414	0.121239	0.0127725		0.929716	0.0468441	0.046506	0.930555	0.0149577	0.0453378
0.3553	1.0395	0.602805	1.04591	1.04368	0.0727479	0.177717		0.9888	0.675995	0.979163	0.988415	0.12468	0.0128835		0.929988	0.0469793	0.0466412	0.930984	0.0149577	0.0452523
0.3563	1.03992	0.602699	1.04634	1.04418	0.0720066	0.177717		0.988353	0.676664	0.978382	0.987526	0.126013	0.0135496		0.929852	0.0469793	0.0467764	0.93107	0.0148721	0.0454234
0.3573	1.04003	0.60095	1.04641	1.04477	0.0724184	0.177173		0.987908	0.678115	0.977601	0.987749	0.12679	0.0143268		0.929988	0.046844	0.0466412	0.931156	0.0144442	0.0453378
0.3583	1.03971	0.59989	1.04598	1.04472	0.0721302	0.177568		0.987908	0.679121	0.977489	0.987859	0.130342	0.0144378		0.929043	0.0467764	0.0467088	0.930125	0.0143587	0.0451666
0.3593	1.03971	0.599572	1.04612	1.04462	0.0726243	0.17742		0.987163	0.679344	0.977378	0.987749	0.130676	0.0144378		0.927148	0.0470469	0.0467764	0.931242	0.0145298	0.0449099
0.3603	1.04061	0.599837	1.04768	1.04448	0.0735302	0.177321		0.987163	0.678451	0.976485	0.988303	0.132119	0.0134386		0.926407	0.0470469	0.046844	0.930211	0.0145298	0.0449099
0.3613	1.04114	0.60042	1.04866	1.04487	0.0743539	0.177123		0.98761	0.677223	0.976596	0.988303	0.139557	0.0125504		0.927963	0.0469793	0.0469793	0.929359	0.0141875	0.0447388
0.3623	1.04093	0.601374	1.04845	1.04547	0.0754248	0.176975		0.98761	0.675213	0.976708	0.989192	0.141445	0.0129945		0.92884	0.0470469	0.0466412	0.929867	0.0144443	0.0446532
0.3633	1.0413	0.602116	1.04866	1.04581	0.0762481	0.176827		0.987313	0.673539	0.977042	0.989303	0.141223	0.0132166		0.929247	0.0466412	0.046506	0.933289	0.0141875	0.0446532
0.3643	1.04177	0.602912	1.04888	1.04586	0.0753008	0.177123		0.986568	0.67287	0.976372	0.98908	0.138558	0.0141047		0.929451	0.0463707	0.0462355	0.935516	0.0147866	0.0448244
0.3653	1.0421	0.603494	1.04916	1.04527	0.0748892	0.176432		0.986568	0.671753	0.976708	0.988858	0.135005	0.0147708		0.929716	0.046506	0.0463707	0.934148	0.0147866	0.0445677
0.3663	1.04204	0.603441	1.0493	1.04472	0.0747245	0.176827		0.986568	0.672088	0.977154	0.988636	0.132563	0.0148819		0.931204	0.0466412	0.046506	0.932695	0.0149577	0.0446532
0.3673	1.04188	0.60307	1.04916	1.04418	0.074148	0.176975		0.98627	0.67287	0.976708	0.988526	0.129787	0.015437		0.931611	0.0466412	0.0461678	0.932352	0.0150433	0.0445677
0.3683	1.04125	0.602699	1.04845	1.04418	0.0735303	0.176728		0.985973	0.672647	0.976485	0.988858	0.126013	0.0145488		0.93134	0.0464383	0.0462355	0.932695	0.0149577	0.0446532
0.3693	1.04114	0.602859	1.04803	1.04423	0.0726243	0.17658		0.985228	0.671753	0.975815	0.987415	0.124458	0.0145488		0.931407	0.0463707	0.0461679	0.93218	0.0151289	0.0452523
0.3703	1.04125	0.603335	1.04803	1.04414	0.0712243	0.176728		0.985378	0.67153	0.975591	0.986305	0.125679	0.0138827		0.932494	0.0465059	0.0460327	0.93175	0.0144443	0.0449955
0.3713	1.04093	0.603972	1.0481	1.04379	0.0709771	0.177469		0.985973	0.672088	0.975368	0.985195	0.12679	0.0149928		0.932154	0.046506	0.0460327	0.931492	0.0141875	0.0448244
0.3723	1.04108	0.604343	1.04874	1.04418	0.0715125	0.178112		0.985823	0.672647	0.976038	0.985305	0.128011	0.0141047		0.93134	0.046506	0.0461002	0.932008	0.0146154	0.0447388
0.3733	1.04167	0.603601	1.04923	1.04423	0.0713889	0.177914		0.985973	0.671641	0.975702	0.985528	0.127678	0.0129945		0.931543	0.0467088	0.0465736	0.930469	0.0144442	0.0448244
0.3743	1.04273	0.603335	1.0498	1.04438	0.0702359	0.177815		0.986121	0.67287	0.975815	0.986527	0.128455	0.0117733		0.932154	0.0467088	0.0467088	0.929523	0.0146154	0.0450811
0.3753	1.04321	0.603283	1.05001	1.04562	0.0701123	0.177963		0.985675	0.672758	0.975257	0.986859	0.128566	0.0111072		0.932691	0.0469117	0.0466412	0.929523	0.0146154	0.0450811
0.3763	1.04315	0.602859	1.05015	1.04616	0.070277	0.178211		0.986568	0.670971	0.97548	0.986749	0.130675	0.0108851		0.932963	0.0467764	0.046506	0.929102	0.0146154	0.0449955
0.3773	1.0431	0.601852	1.0505	1.04616	0.0711418	0.178458		0.985228	0.669632	0.974921	0.986638	0.132674	0.0104411		0.932895	0.0467088	0.0466412	0.929695	0.0142731	0.0451666
0.3783	1.04337	0.601798	1.05079	1.04591	0.0719654	0.178309		0.984336	0.669632	0.97414	0.986082	0.135893	0.0121063		0.93229	0.0466412	0.046506	0.93107	0.0143587	0.0454234
0.3793	1.04347	0.601745	1.05086	1.04537	0.0729126	0.178309		0.984781	0.669856	0.974698	0.986082	0.13767	0.0125504		0.931747	0.0465736	0.0464383	0.933547	0.0141875	0.0453378
0.3803	1.04294	0.60201	1.05043	1.04492	0.0741892	0.17826		0.985973	0.668628	0.975034	0.987193	0.135561	0.0124394		0.931883	0.0466412	0.0464383	0.933633	0.0144442	0.0453378
0.3813	1.0421	0.602594	1.04959	1.04562	0.0742715	0.177371		0.986121	0.667177	0.975145	0.987415	0.131231	0.0127725		0.931679	0.0467088	0.046506	0.932523	0.0142731	0.045509
0.3823	1.04199	0.602912	1.04937	1.04556	0.0727066	0.178013		0.98627	0.669298	0.975704	0.986416	0.128455	0.0148819		0.932019	0.0467088	0.046506	0.932867	0.0142731	0.0452523
0.3833	1.04204	0.602965	1.04874	1.04586	0.0713477	0.177765		0.986418	0.67153	0.976485	0.985084	0.128122	0.0145488		0.933031	0.0467764	0.0463707	0.93432	0.014102	0.0451666
0.3843	1.04215	0.603177	1.04874	1.04631	0.0704005	0.177865		0.986121	0.674209	0.976149	0.986082	0.129676	0.0137716		0.932895	0.0467764	0.0466412	0.934578	0.0143587	0.045509
0.3853	1.04204	0.603123	1.04888	1.04695	0.0694122	0.177667		0.985378	0.67499	0.975815	0.985861	0.129787	0.0143268		0.932623	0.0469117	0.0468441	0.934836	0.0146154	0.0451666
0.3863	1.04278	0.603654	1.04959	1.0472	0.0694534	0.178062		0.984484	0.674768	0.975257	0.986082	0.131231	0.0149928		0.932358	0.0468441	0.0466412	0.93432	0.0144442	0.0457657
0.3873	1.04337	0.604237	1.05043	1.04823	0.0702771	0.177321		0.984633	0.674655	0.975033	0.985305	0.132785	0.0138827		0.931543	0.0467088	0.0465736	0.934578	0.014102	0.0454234
0.3883	1.04374	0.604608	1.05072	1.04843	0.0716359	0.177222		0.985378	0.673986	0.975927	0.983862	0.135449	0.0143268		0.930938	0.0471145	0.046844	0.93475	0.014701	0.0450811
0.3893	1.04342	0.604237	1.05057	1.04784	0.072336	0.176332		0.985526	0.672981	0.976485	0.984196	0.135227	0.0153259		0.931006	0.0471145	0.0468441	0.934406	0.0149577	0.0448244
0.3903	1.04278	0.603812	1.04959	1.04656	0.0739421	0.176283		0.985526	0.671865	0.975815	0.984862	0.130342	0.015548		0.931611	0.0469793	0.0467088	0.93432	0.0149577	0.0447388
0.3913	1.04241	0.604025	1.04888	1.0465	0.0748892	0.176481		0.985228	0.671865	0.975815	0.984973	0.131119	0.0145488		0.932494	0.0469793	0.0467088	0.933375	0.0148721	0.044482
0.3923	1.04199	0.604872	1.04874	1.0471	0.0763714	0.176827		0.984186	0.6722	0.974476	0.985195	0.131786	0.0134386		0.934383	0.0469793	0.0467088	0.93218	0.0151289	0.0446532
0.3933	1.04225	0.605721	1.04881	1.04754	0.0762895	0.177617		0.983591	0.673204	0.973917	0.984418	0.132119	0.0137716		0.934994	0.0467088	0.0467764	0.931406	0.0147866	0.0452523
0.3943	1.04241	0.606092	1.04902	1.04759	0.0761662	0.177815		0.983293	0.675213	0.973582	0.984639	0.130898	0.0144378		0.93371	0.0467764	0.046506	0.931922	0.014102	0.0451666
0.3953	1.04268	0.604979	1.04881	1.04744	0.0754654	0.178161		0.983144	0.67566	0.973247	0.985084	0.131675	0.0141047		0.932556	0.0465736	0.0463031	0.934148	0.0139308	0.0450811
0.3963	1.04236	0.604343	1.04845	1.0475	0.0750539	0.176926		0.982698	0.674543	0.973359	0.985527	0.131342	0.0139936		0.932556	0.0466412	0.0463707	0.93475	0.0143587	0.0450811
0.3973	1.04263	0.604237	1.04909	1.04739	0.0741068	0.176234		0.982698	0.67287	0.972689	0.985527	0.132341	0.0136607		0.933506	0.046506	0.0465736	0.934836	0.0144442	0.0453378
0.3983	1.04263	0.603706	1.04952	1.04764	0.0731597	0.176728		0.983293	0.672088	0.973024	0.98575	0.129676	0.0143268		0.933167	0.0468441	0.0466412	0.936031	0.0144443	0.0451666
0.3993	1.04294	0.603441	1.04994	1.04798	0.0731185	0.177469		0.982996	0.67153	0.97347	0.985084	0.127567	0.0136607		0.93371	0.0470469	0.0465736	0.937742	0.0142731	0.0446532
0.4003	1.0439	0.60413	1.05121	1.04774	0.074848	0.177519		0.983144	0.670637	0.97347	0.984639	0.128011	0.0129945		0.934043	0.046844	0.0463707	0.937484	0.0144443	0.0449955
0.4013	1.04437	0.604025	1.05163	1.04819	0.0758774	0.177025		0.981954	0.67019	0.973247	0.984973	0.131786	0.0128835		0.934383	0.0464383	0.0462355	0.936375	0.0143587	0.0449099
0.4023	1.04416	0.603388	1.05149	1.04898	0.0750951	0.177074		0.981806	0.669856	0.972913	0.985528	0.133451	0.0134386		0.934654	0.0463031	0.0461002	0.935773	0.0143587	0.0447388
0.4033	1.04416	0.60323	1.05121	1.04937	0.0737773	0.177717		0.981209	0.669409	0.973247	0.985195	0.133451	0.0135496		0.935401	0.0463707	0.0462355	0.934492	0.0144443	0.0453378
0.4043	1.04437	0.60307	1.05114	1.04962	0.0741068	0.178705		0.981656	0.669075	0.973359	0.985527	0.132785	0.0125504		0.936685	0.0465736	0.0464383	0.933891	0.0144442	0.0452523
0.4053	1.04363	0.602912	1.0505	1.04967	0.0743127	0.17826		0.981656	0.667846	0.973024	0.985305	0.134672	0.0111072		0.936889	0.0467088	0.0465059	0.93543	0.014701	0.0450811
0.4063	1.04326	0.603176	1.0505	1.04952	0.0744774	0.177271		0.982103	0.667288	0.973806	0.985305	0.134228	0.0114403		0.936346	0.0467764	0.0464383	0.935945	0.0149577	0.0448244
0.4073	1.04368	0.603388	1.05065	1.04843	0.074148	0.176332		0.982549	0.668069	0.973247	0.985084	0.133673	0.0123284		0.936278	0.0467088	0.0465736	0.936461	0.0147866	0.0443965
0.4083	1.04363	0.603388	1.05079	1.04769	0.073695	0.176481		0.982251	0.670079	0.973136	0.984418	0.133784	0.0124394		0.93621	0.0467088	0.0464383	0.935172	0.0146154	0.0443965
0.4093	1.04406	0.604025	1.05149	1.04725	0.0742715	0.177371		0.981507	0.671196	0.971908	0.984307	0.134339	0.0125504		0.937222	0.0469117	0.0467088	0.934664	0.0149577	0.0445677
0.4103	1.04374	0.605403	1.05121	1.047	0.0741068	0.178161		0.982401	0.67153	0.972689	0.983641	0.133229	0.0127725		0.937358	0.0467088	0.0466412	0.934664	0.0150433	0.0443109
0.4113	1.04347	0.605085	1.05079	1.0475	0.0731597	0.177963		0.983591	0.67086	0.973136	0.984196	0.129344	0.0124394		0.936617	0.0467088	0.0463031	0.934406	0.0149577	0.0448244
0.4123	1.04352	0.604077	1.05065	1.04877	0.0742715	0.177865		0.98374	0.670414	0.97347	0.98353	0.125791	0.0128835		0.936006	0.0465736	0.0461679	0.934922	0.0150433	0.044482
0.4133	1.04289	0.604025	1.04994	1.04848	0.0756308	0.17826		0.983144	0.669409	0.9728	0.982086	0.127123	0.0133276		0.93513	0.046506	0.0461678	0.933125	0.0151289	0.0443109
0.4143	1.04268	0.604501	1.04966	1.04739	0.0772361	0.178359		0.982251	0.668182	0.972466	0.982086	0.128233	0.0135496		0.935198	0.0463707	0.0461679	0.932781	0.0147866	0.0443109
0.4153	1.0423	0.603972	1.0493	1.04739	0.0765774	0.177667		0.981806	0.668181	0.971796	0.982753	0.129676	0.0132166		0.935802	0.046506	0.0461679	0.933039	0.0145298	0.0439686
0.4163	1.04278	0.603759	1.04945	1.04843	0.0755481	0.177223		0.981209	0.667065	0.971796	0.983419	0.130564	0.0131055		0.935802	0.0464383	0.0463707	0.933375	0.0145298	0.044482
0.4173	1.04374	0.604448	1.05015	1.04848	0.074395	0.176728		0.980317	0.666173	0.971462	0.983307	0.130898	0.0136607		0.935802	0.046506	0.0462355	0.935516	0.0143587	0.0443109
0.4183	1.04411	0.604501	1.05072	1.04863	0.0733655	0.177271		0.980466	0.665056	0.970792	0.983085	0.134672	0.0141047		0.935333	0.0465736	0.0464383	0.937227	0.0142731	0.0443109
0.4193	1.04426	0.604077	1.05043	1.04947	0.0727067	0.177321		0.980317	0.664497	0.970345	0.983085	0.136559	0.0142158		0.934722	0.0467088	0.046506	0.938852	0.0146154	0.0449099
0.4203	1.04421	0.602859	1.05079	1.05006	0.0722948	0.176876		0.978679	0.665948	0.969564	0.982641	0.131009	0.0137716		0.934247	0.0467764	0.0467088	0.939883	0.0143587	0.0450811
0.4213	1.04406	0.601745	1.05072	1.04952	0.072542	0.176135		0.979126	0.670079	0.969452	0.98353	0.126124	0.0142158		0.934383	0.0469793	0.0467764	0.938516	0.0144442	0.0449099
0.4223	1.04347	0.60217	1.05065	1.04957	0.072789	0.175938		0.980019	0.673204	0.970234	0.98353	0.125458	0.0149928		0.935062	0.0469117	0.0466412	0.93843	0.0145298	0.0449955
0.4233	1.04363	0.602594	1.05121	1.04992	0.0729126	0.17569		0.980764	0.675325	0.970122	0.983085	0.125124	0.0145488		0.935802	0.0466412	0.0465059	0.940648	0.0146154	0.0450811
0.4243	1.04385	0.602434	1.05192	1.04996	0.0729949	0.175592		0.980168	0.672981	0.968671	0.981753	0.126346	0.0139936		0.936414	0.046844	0.0464383	0.940906	0.0146154	0.0453378
0.4253	1.04426	0.602752	1.05255	1.05016	0.0730773	0.175938		0.980019	0.670302	0.969005	0.980643	0.128788	0.0151039		0.936617	0.0467088	0.0463031	0.937312	0.0148721	0.045509
0.4263	1.0449	0.604077	1.05284	1.05071	0.0737362	0.175443		0.981061	0.669967	0.970345	0.979977	0.131453	0.0146599		0.936481	0.0466412	0.0465736	0.933805	0.014701	0.0452523
0.4273	1.04559	0.605085	1.05347	1.0511	0.0735303	0.175938		0.981656	0.670637	0.970792	0.980309	0.134006	0.0146599		0.93729	0.0467764	0.0465736	0.933203	0.0146154	0.0455945
0.4283	1.04612	0.605455	1.0534	1.0511	0.0725831	0.176432		0.981359	0.672535	0.971573	0.979532	0.133673	0.015437		0.938241	0.0468441	0.0464383	0.934492	0.014701	0.0451666
0.4293	1.04522	0.605032	1.0522	1.0509	0.0724595	0.176234		0.980317	0.671418	0.971685	0.979755	0.132452	0.0164361		0.939389	0.0466412	0.0465736	0.93757	0.0146154	0.0451666
0.4303	1.04522	0.604025	1.05227	1.05046	0.072336	0.175986		0.980466	0.67019	0.970904	0.980199	0.140001	0.0168803		0.939185	0.0464383	0.0463031	0.939195	0.0144442	0.0455945
0.4313	1.04527	0.60307	1.05227	1.05056	0.0733656	0.176432		0.980019	0.670637	0.971238	0.980643	0.145108	0.0165472		0.939117	0.0465736	0.0463031	0.939281	0.0148721	0.0450811
0.4323	1.04581	0.602912	1.05319	1.05095	0.0746421	0.177074		0.981507	0.671083	0.971685	0.981309	0.142111	0.0158811		0.939525	0.0465736	0.0463707	0.939109	0.0149577	0.0452523
0.4333	1.04655	0.602752	1.05347	1.05065	0.0760008	0.177469		0.981656	0.671196	0.971462	0.981976	0.137558	0.015548		0.939593	0.0464383	0.0461678	0.941422	0.0148721	0.0450811
0.4343	1.04692	0.602965	1.05404	1.05021	0.0751775	0.177617		0.982251	0.671753	0.971685	0.982308	0.132119	0.0153259		0.939117	0.0465736	0.046506	0.943047	0.0146154	0.0451666
0.4353	1.04681	0.603123	1.05404	1.05046	0.0745186	0.177765		0.982846	0.67153	0.972466	0.981642	0.129787	0.0148819		0.939185	0.0467764	0.0463707	0.944328	0.0146154	0.0447388
0.4363	1.04655	0.603706	1.05397	1.05031	0.074395	0.177667		0.983144	0.67153	0.972913	0.981531	0.130898	0.0142157		0.938846	0.0467088	0.0466412	0.944328	0.014701	0.0447388
0.4373	1.04596	0.604077	1.0527	1.0508	0.074148	0.17658		0.983144	0.672758	0.9728	0.980754	0.133229	0.0134386		0.937901	0.0465736	0.0463707	0.942531	0.014701	0.0447388
0.4383	1.04548	0.603972	1.05163	1.05085	0.074395	0.175888		0.981954	0.674321	0.972466	0.979754	0.136893	0.0135496		0.936414	0.0467088	0.0463707	0.941594	0.0150433	0.0449955
0.4393	1.04522	0.60413	1.05135	1.05021	0.0738598	0.176481		0.980019	0.674321	0.971015	0.979532	0.138669	0.0134386		0.935735	0.046506	0.0463707	0.941594	0.0151289	0.0452523
0.4403	1.04495	0.604608	1.05135	1.04947	0.0726655	0.177025		0.979424	0.672981	0.969452	0.979866	0.142999	0.0131055		0.93621	0.0466412	0.0464383	0.941422	0.0146154	0.0449955
0.4413	1.04469	0.604608	1.0517	1.04967	0.0716771	0.177271		0.979274	0.673428	0.96923	0.980088	0.14633	0.0143268		0.937698	0.0467764	0.046506	0.939711	0.014701	0.0451666
0.4423	1.04437	0.60429	1.05156	1.05036	0.0708947	0.177123		0.979424	0.6722	0.970234	0.980309	0.144331	0.015548		0.939593	0.0468441	0.0466412	0.939453	0.0144443	0.0450811
0.4433	1.04448	0.604395	1.05142	1.05095	0.0707712	0.176926		0.978829	0.671418	0.969564	0.981309	0.139557	0.0154369		0.940401	0.0471145	0.0468441	0.940227	0.0141875	0.0445676
0.4443	1.04495	0.603972	1.05185	1.0508	0.0704006	0.176283		0.978829	0.66952	0.968894	0.981753	0.134117	0.0152149		0.939864	0.0471145	0.0468441	0.939969	0.0142731	0.0443109
0.4453	1.04559	0.603441	1.0527	1.05036	0.0707712	0.175592		0.979274	0.668516	0.969452	0.98042	0.132341	0.0156591		0.939185	0.0471145	0.0469793	0.941852	0.0147866	0.044482
0.4463	1.04617	0.603812	1.05375	1.04996	0.0706065	0.176036		0.979871	0.66952	0.970122	0.979754	0.130009	0.0148819		0.93871	0.0469117	0.046844	0.941766	0.0145298	0.0448244
0.4473	1.04607	0.60429	1.05383	1.04986	0.0719242	0.176777		0.979573	0.669632	0.970568	0.979643	0.1279	0.0137716		0.939593	0.0469793	0.0465736	0.940055	0.0145298	0.0451666
0.4483	1.04538	0.60429	1.05312	1.05026	0.0730361	0.177765		0.979721	0.669186	0.969898	0.979754	0.131231	0.0139936		0.939864	0.0465736	0.0465736	0.939023	0.0144442	0.0449955
0.4493	1.04469	0.60429	1.05263	1.0509	0.0735714	0.177568		0.978531	0.668963	0.96923	0.978977	0.133007	0.0149928		0.939994	0.0466412	0.0465736	0.938	0.0143587	0.0446532
0.4503	1.04512	0.603866	1.05291	1.05105	0.0744774	0.177469		0.978382	0.668405	0.969117	0.979422	0.129454	0.0162141		0.940809	0.0467088	0.0466412	0.937055	0.0144442	0.0448244
0.4513	1.04575	0.604183	1.05326	1.05165	0.0730772	0.177173		0.979126	0.668628	0.969117	0.979754	0.125346	0.0164361		0.939994	0.0468441	0.0464383	0.936461	0.0143587	0.0449099
0.4523	1.04623	0.604077	1.05361	1.05174	0.0715125	0.176481		0.978234	0.668405	0.968671	0.980199	0.122904	0.0163251		0.938574	0.0466412	0.046506	0.936203	0.0147009	0.0449099
0.4533	1.04686	0.603601	1.0539	1.05204	0.0708535	0.176382		0.977787	0.668293	0.967779	0.980754	0.123459	0.0165472		0.937833	0.046506	0.046506	0.936031	0.0145298	0.0445677
0.4543	1.04755	0.603283	1.05446	1.05219	0.0709771	0.177123		0.977637	0.667958	0.968336	0.980976	0.127567	0.0163251		0.938309	0.0465736	0.0461002	0.935258	0.0143587	0.044482
0.4553	1.04808	0.602859	1.05481	1.05248	0.0712653	0.177617		0.97734	0.668628	0.968447	0.98042	0.129676	0.01577		0.939593	0.0466412	0.0463707	0.936883	0.0144442	0.0446532
0.4563	1.04771	0.602646	1.05439	1.05209	0.0708535	0.177617		0.977787	0.667624	0.968113	0.978311	0.129454	0.0156591		0.940741	0.046506	0.046506	0.939625	0.0145298	0.0449099
0.4573	1.04713	0.602541	1.05397	1.05209	0.0713065	0.178112		0.97734	0.667512	0.968001	0.978089	0.130676	0.0151039		0.941481	0.0467088	0.0465736	0.941422	0.0144442	0.0449099
0.4583	1.04617	0.602752	1.05291	1.05169	0.0724595	0.17826		0.978084	0.668739	0.96789	0.977423	0.130898	0.0151039		0.941352	0.0467764	0.046506	0.941078	0.014701	0.0445677
0.4593	1.04559	0.603441	1.05213	1.051	0.0728714	0.177321		0.978829	0.668739	0.968336	0.978423	0.129898	0.0148819		0.941481	0.0469117	0.0467764	0.939109	0.0148721	0.0445677
0.4603	1.04596	0.60307	1.05234	1.0512	0.0720066	0.176629		0.978084	0.669967	0.967666	0.979643	0.126679	0.0138827		0.941012	0.0468441	0.0468441	0.938688	0.0146154	0.0449099
0.4613	1.04639	0.60217	1.05319	1.0512	0.070277	0.176876		0.978531	0.670414	0.968001	0.979422	0.1279	0.0131056		0.939728	0.0469793	0.0467764	0.939797	0.014701	0.0449099
0.4623	1.04723	0.601481	1.05404	1.051	0.0692887	0.177865		0.978382	0.668516	0.968783	0.979089	0.130009	0.0125505		0.939593	0.0470469	0.0469793	0.939711	0.0144443	0.0445677
0.4633	1.04739	0.601692	1.0539	1.05075	0.0699064	0.177617		0.978382	0.667624	0.969005	0.979089	0.130453	0.0131055		0.940198	0.0469117	0.0467764	0.939883	0.014701	0.0448244
0.4643	1.04708	0.602541	1.05368	1.0509	0.072089	0.176876		0.979126	0.666842	0.969117	0.978311	0.13012	0.0135496		0.939994	0.0467764	0.0465736	0.939711	0.0150433	0.0453378
0.4653	1.0467	0.603919	1.05354	1.05056	0.073242	0.176777		0.979126	0.666284	0.96923	0.978311	0.130009	0.0141047		0.93966	0.0466412	0.0465736	0.942281	0.0150433	0.045509
0.4663	1.04665	0.604661	1.05368	1.05085	0.0737362	0.176283		0.978382	0.667624	0.96923	0.978755	0.127123	0.0149928		0.939728	0.0465736	0.0466412	0.944078	0.0152145	0.0458513
0.4673	1.04591	0.604661	1.05312	1.05154	0.0739421	0.176086		0.977787	0.669409	0.969005	0.979089	0.125236	0.0154369		0.939728	0.0467088	0.0463031	0.94425	0.0152145	0.0456802
0.4683	1.04538	0.60413	1.05255	1.0515	0.0742303	0.176086		0.978234	0.670526	0.969675	0.979422	0.12679	0.0164361		0.93966	0.046506	0.0463707	0.944328	0.0153	0.0455945
0.4693	1.04559	0.603919	1.05263	1.05184	0.0745186	0.175641		0.978829	0.671196	0.969452	0.9792	0.130565	0.0169912		0.939321	0.0465736	0.0465736	0.945789	0.0153	0.0452523
0.4703	1.04607	0.603865	1.05326	1.05169	0.0743539	0.174751		0.978679	0.670971	0.969117	0.9792	0.135116	0.0163251		0.940265	0.046844	0.0463707	0.945961	0.0151289	0.0451666
0.4713	1.0467	0.604025	1.05404	1.05209	0.0742715	0.174159		0.978234	0.670526	0.968783	0.979866	0.137336	0.0162141		0.941889	0.0467088	0.0463031	0.9445	0.0153856	0.0449099
0.4723	1.04729	0.604555	1.0546	1.05234	0.0752188	0.173615		0.978531	0.671641	0.968894	0.979532	0.137781	0.015437		0.942833	0.0465736	0.0463707	0.943992	0.0153	0.0446532
0.4733	1.04766	0.605137	1.05524	1.05238	0.0770308	0.173813		0.979573	0.67153	0.96923	0.979311	0.136559	0.0139936		0.943309	0.0467088	0.0464383	0.942617	0.0149577	0.0449955
0.4743	1.04761	0.605297	1.05481	1.05288	0.0778955	0.174505		0.980019	0.670079	0.969787	0.979754	0.135116	0.0127725		0.943648	0.0467088	0.0463707	0.941164	0.0144442	0.0450811
0.4753	1.04723	0.606039	1.05425	1.05338	0.0783075	0.174801		0.980614	0.668739	0.971126	0.979311	0.134228	0.0125505		0.943444	0.046844	0.0465736	0.939711	0.0149577	0.045509
0.4763	1.04665	0.605933	1.05375	1.05328	0.0781421	0.174998		0.980019	0.669409	0.970904	0.978866	0.133118	0.0118843		0.943852	0.0469117	0.0466412	0.939453	0.0149577	0.0454234
0.4773	1.04607	0.604819	1.05354	1.05317	0.0773188	0.175295		0.978234	0.669745	0.969005	0.977868	0.132563	0.0126615		0.944259	0.0467088	0.0466412	0.940398	0.0145298	0.0453378
0.4783	1.04623	0.603812	1.05312	1.05323	0.0764955	0.175394		0.976596	0.670637	0.96722	0.9782	0.132785	0.0143268		0.94466	0.0467088	0.046506	0.942367	0.0146154	0.0450811
0.4793	1.04676	0.602912	1.05319	1.05347	0.0757955	0.175888		0.977042	0.671084	0.96722	0.977868	0.13334	0.0153259		0.944259	0.0467764	0.046506	0.942703	0.0146154	0.0449955
0.4803	1.04766	0.60201	1.05425	1.05411	0.074848	0.175986		0.976745	0.66952	0.96722	0.977757	0.130898	0.0153259		0.94392	0.0467088	0.0464383	0.942281	0.0146154	0.0450811
0.4813	1.04739	0.601852	1.05411	1.05476	0.0743539	0.175838		0.975852	0.668739	0.965992	0.977312	0.130453	0.0151039		0.943444	0.0467088	0.0466412	0.944164	0.0144442	0.0452523
0.4823	1.0466	0.60201	1.05375	1.05594	0.0733656	0.176777		0.976001	0.668293	0.965322	0.977868	0.129898	0.0152149		0.942568	0.0466412	0.0466412	0.945359	0.0147866	0.0451666
0.4833	1.04665	0.601852	1.05418	1.05609	0.0724184	0.177617		0.976001	0.667846	0.964876	0.977868	0.131897	0.0149928		0.9425	0.0465736	0.0465736	0.945617	0.0147866	0.0453378
0.4843	1.04692	0.601586	1.05418	1.05565	0.0712653	0.178458		0.976149	0.667288	0.965545	0.977423	0.132008	0.0153259		0.942568	0.0467764	0.046506	0.944844	0.014701	0.0451666
0.4853	1.04703	0.602063	1.05474	1.05486	0.0713477	0.178952		0.976596	0.666507	0.966439	0.976868	0.130676	0.0137718		0.942432	0.046844	0.046506	0.942703	0.0148722	0.0452523
0.4863	1.04755	0.602752	1.05524	1.05362	0.0718419	0.178655		0.977042	0.66673	0.967443	0.976424	0.131342	0.0128835		0.942704	0.046506	0.046506	0.94057	0.0147866	0.0451666
0.4873	1.04808	0.604237	1.05545	1.05313	0.0732832	0.177667		0.976447	0.668069	0.967666	0.976646	0.132008	0.0119953		0.942636	0.0468441	0.0465736	0.94082	0.0153001	0.0451666
0.4883	1.0484	0.605403	1.05545	1.05308	0.0748068	0.17653		0.976149	0.668963	0.96789	0.976868	0.133451	0.0127725		0.943105	0.0467088	0.0464383	0.94125	0.0151289	0.0443965
0.4893	1.04877	0.60535	1.05503	1.05328	0.0748068	0.176777		0.97734	0.669409	0.969005	0.977646	0.133562	0.0132166		0.943105	0.046506	0.0463707	0.940906	0.0151289	0.0448244
0.4903	1.04888	0.604237	1.05474	1.05367	0.0752602	0.176481		0.977192	0.668739	0.969341	0.978311	0.133784	0.0135496		0.942228	0.0464383	0.0461679	0.94168	0.0145298	0.0453378
0.4913	1.04861	0.603972	1.05411	1.05386	0.0752188	0.175641		0.977787	0.668293	0.96923	0.977757	0.13445	0.0146599		0.941685	0.0463707	0.0460327	0.94168	0.0146154	0.0452523
0.4923	1.04808	0.603759	1.05368	1.0549	0.0753008	0.17574		0.978531	0.668963	0.968894	0.978423	0.132563	0.0158811		0.942364	0.0463031	0.0461679	0.943219	0.0145298	0.0452523
0.4933	1.04787	0.604183	1.05383	1.0553	0.0753835	0.176926		0.978234	0.669967	0.968224	0.978534	0.131231	0.0156589		0.9425	0.0465736	0.046506	0.943391	0.0148721	0.0456802
0.4943	1.04803	0.604555	1.05446	1.05505	0.0755481	0.177568		0.977936	0.67019	0.96789	0.9782	0.129787	0.0153259		0.942704	0.0469117	0.046506	0.943477	0.014701	0.0453378
0.4953	1.04787	0.604661	1.05439	1.05451	0.074601	0.177667		0.976894	0.671083	0.966885	0.978866	0.128899	0.0145488		0.943716	0.0468441	0.0465736	0.943477	0.0146154	0.0452523
0.4963	1.04803	0.605297	1.05495	1.05342	0.074148	0.177371		0.975852	0.67019	0.965992	0.978311	0.128899	0.0144378		0.945	0.0469793	0.0467764	0.942961	0.0148721	0.0451666
0.4973	1.04787	0.605986	1.05488	1.05382	0.0737774	0.177617		0.975257	0.669409	0.965433	0.978645	0.130009	0.0146599		0.945475	0.0469793	0.0467088	0.943906	0.0147866	0.0449099
0.4983	1.04782	0.605826	1.05481	1.05436	0.0733656	0.177469		0.975107	0.668069	0.965211	0.978977	0.130675	0.0143268		0.945272	0.0469117	0.0467764	0.943906	0.0148721	0.0448244
0.4993	1.04792	0.604926	1.05453	1.05421	0.0729538	0.176283		0.975107	0.667065	0.964988	0.978089	0.12901	0.0137716		0.944796	0.0469117	0.0466412	0.9445	0.0150433	0.0449099
0.5003	1.04819	0.603706	1.05503	1.05421	0.0716771	0.175196		0.975107	0.667624	0.965322	0.977423	0.125346	0.0137716		0.943716	0.0468441	0.0467088	0.943562	0.0150433	0.0449099
0.5013	1.04914	0.603441	1.05574	1.05421	0.072789	0.174702		0.975405	0.668628	0.965322	0.977312	0.120018	0.0144378		0.943105	0.0467088	0.0465736	0.942703	0.0148721	0.0451666
0.5023	1.04952	0.604025	1.05637	1.05347	0.0747246	0.174998		0.976001	0.668851	0.965433	0.977534	0.118907	0.0138827		0.943173	0.0467088	0.0465736	0.943734	0.0145298	0.0450811
0.5033	1.04941	0.60413	1.05637	1.05338	0.0751363	0.175789		0.976149	0.668739	0.965545	0.977534	0.120906	0.0136607		0.943648	0.0470469	0.046844	0.94382	0.014701	0.0453378
0.5043	1.04962	0.604448	1.05672	1.05308	0.0757128	0.176234		0.976001	0.667288	0.966215	0.977423	0.122127	0.0141047		0.945475	0.0472498	0.0469793	0.943734	0.0147866	0.0451666
0.5053	1.04962	0.604448	1.05694	1.05298	0.0753835	0.17653		0.976299	0.665948	0.96722	0.977312	0.124681	0.0144378		0.946895	0.0469793	0.0467088	0.944672	0.0146154	0.0445677
0.5063	1.0493	0.604077	1.05644	1.05298	0.0752602	0.176975		0.976745	0.665391	0.967554	0.977312	0.126901	0.0141047		0.947296	0.0470469	0.0467088	0.944672	0.0147866	0.0446532
0.5073	1.04866	0.603494	1.05595	1.05283	0.0750539	0.176926		0.977192	0.665391	0.96722	0.97698	0.128011	0.0142158		0.947568	0.046844	0.0465736	0.945187	0.0149577	0.0449955
0.5083	1.04814	0.60307	1.05538	1.05248	0.0743951	0.177469		0.976596	0.666173	0.966103	0.97598	0.125347	0.0145488		0.947636	0.0470469	0.0467764	0.945961	0.0151289	0.0447388
0.5093	1.0483	0.603812	1.05552	1.05244	0.0739832	0.177173		0.976745	0.665726	0.966215	0.975424	0.122349	0.0146599		0.947636	0.0469117	0.0467088	0.946641	0.0152145	0.0449955
0.5103	1.04866	0.604237	1.0563	1.05244	0.0729949	0.176777		0.977787	0.666842	0.966885	0.976314	0.118908	0.0148819		0.947099	0.0469793	0.0467764	0.945961	0.0151289	0.045509
0.5113	1.04877	0.604025	1.0563	1.05223	0.0721302	0.176777		0.978084	0.668963	0.967443	0.97598	0.120573	0.0146599		0.945747	0.0469793	0.0465736	0.945273	0.0152145	0.0452523
0.5123	1.04893	0.603866	1.05588	1.05223	0.0731185	0.177667		0.975852	0.669186	0.965769	0.975647	0.124125	0.0141047		0.945809	0.0469117	0.0467764	0.945875	0.0154712	0.0454234
0.5133	1.04946	0.603601	1.05637	1.05223	0.0741891	0.178112		0.97481	0.669075	0.964429	0.976314	0.127012	0.0143268		0.94534	0.0469117	0.0466412	0.946984	0.0150433	0.0451666
0.5143	1.04962	0.60323	1.05623	1.05199	0.0733244	0.177717		0.975257	0.668739	0.965769	0.976535	0.12901	0.0145488		0.943988	0.0469117	0.0466412	0.949039	0.0151289	0.0454234
0.5153	1.04872	0.603283	1.05588	1.05263	0.073242	0.17742		0.974215	0.668739	0.964988	0.97598	0.129898	0.015215		0.942969	0.0467764	0.0466412	0.946812	0.0148721	0.045509
0.5163	1.04835	0.603388	1.05559	1.05317	0.0740244	0.176777		0.97362	0.668851	0.964764	0.975424	0.130786	0.0156589		0.942636	0.046506	0.0463031	0.945445	0.0148721	0.0453378
0.5173	1.04792	0.603601	1.05474	1.05372	0.0733656	0.176777		0.972577	0.668516	0.96376	0.97598	0.131342	0.0153259		0.943105	0.0467088	0.046506	0.945187	0.0147866	0.0454234
0.5183	1.04761	0.604343	1.05425	1.05432	0.072995	0.176629		0.97228	0.666842	0.96376	0.97598	0.134561	0.0147708		0.943444	0.0465736	0.0463031	0.946641	0.014701	0.0449955
0.5193	1.04734	0.605085	1.05383	1.05451	0.0733656	0.177123		0.97362	0.666173	0.964318	0.974981	0.137004	0.0142158		0.94392	0.0465736	0.0463031	0.94818	0.0145298	0.0449955
0.5203	1.04808	0.605137	1.05418	1.05432	0.0740656	0.178013		0.974662	0.665948	0.964988	0.974759	0.132341	0.0132166		0.944056	0.0465736	0.0463031	0.94793	0.0146154	0.0446532
0.5213	1.04904	0.605085	1.0551	1.05426	0.073242	0.177914		0.974662	0.665503	0.964541	0.975203	0.130897	0.0119954		0.943105	0.0464383	0.0462355	0.9475	0.0145298	0.0446532
0.5223	1.04994	0.605085	1.05686	1.05436	0.0739832	0.177469		0.974512	0.66673	0.964429	0.975424	0.129898	0.0117733		0.942364	0.0465736	0.0463031	0.947672	0.0146154	0.0449099
0.5233	1.04957	0.605774	1.05722	1.05436	0.0751775	0.176432		0.97481	0.668293	0.964652	0.976314	0.128455	0.0122174		0.942093	0.0466412	0.0463031	0.946984	0.014701	0.0449955
0.5243	1.04952	0.605615	1.05778	1.05402	0.074848	0.175838		0.97481	0.667846	0.964988	0.976535	0.128899	0.0117733		0.944056	0.0467088	0.0463707	0.945531	0.0149577	0.0452523
0.5253	1.04994	0.60535	1.05806	1.05382	0.0737774	0.175838		0.975405	0.667846	0.965433	0.976646	0.129676	0.0114402		0.945747	0.0466412	0.0465736	0.944414	0.0149577	0.0448244
0.5263	1.05041	0.605403	1.05799	1.05367	0.0722125	0.175492		0.974959	0.668405	0.964764	0.976535	0.129565	0.0122174		0.946216	0.0469117	0.0467764	0.943047	0.0151289	0.0450811
0.5273	1.04983	0.605561	1.05708	1.05347	0.0717595	0.174998		0.976001	0.667846	0.965992	0.975092	0.129898	0.0127725		0.946759	0.0468441	0.046844	0.943992	0.0151289	0.0451666
0.5283	1.04893	0.60535	1.05566	1.05352	0.0720477	0.174505		0.975702	0.667512	0.965658	0.974758	0.134561	0.0128835		0.947167	0.0469117	0.0469117	0.944844	0.0152145	0.044482
0.5293	1.04861	0.605508	1.05545	1.05386	0.0718419	0.174751		0.975257	0.667177	0.964988	0.974426	0.137781	0.0133276		0.947364	0.0468441	0.0467088	0.945445	0.0151289	0.0448244
0.5303	1.04883	0.604343	1.05566	1.05386	0.072789	0.175097		0.975405	0.666842	0.965322	0.973649	0.138224	0.0137716		0.947907	0.0468441	0.0465736	0.946133	0.0149577	0.0450811
0.5313	1.04877	0.604237	1.05552	1.05421	0.0749303	0.175394		0.975257	0.667399	0.965658	0.974315	0.141445	0.0145488		0.947235	0.0467764	0.046506	0.946812	0.0147866	0.0448244
0.5323	1.04909	0.604714	1.05588	1.05461	0.074848	0.176382		0.975107	0.667958	0.965769	0.97487	0.143331	0.0148819		0.945877	0.0463707	0.0463031	0.947156	0.0151289	0.0449955
0.5333	1.0493	0.605032	1.05601	1.05451	0.0741068	0.178062		0.974662	0.667512	0.965322	0.975203	0.140889	0.0151039		0.945272	0.0466412	0.0463031	0.948609	0.0150433	0.0449099
0.5343	1.04899	0.605085	1.05595	1.0548	0.0743127	0.177914		0.973917	0.669409	0.964429	0.976314	0.137447	0.0161031		0.945611	0.0463707	0.0461679	0.949469	0.0147866	0.0451666
0.5353	1.04914	0.604926	1.05615	1.05535	0.0743538	0.177222		0.973322	0.67019	0.963648	0.975869	0.135672	0.01577		0.945611	0.0465736	0.0464383	0.950406	0.0146154	0.044482
0.5363	1.04952	0.60519	1.05665	1.0552	0.0752188	0.176728		0.972132	0.669633	0.962755	0.975647	0.134117	0.0144378		0.945877	0.0465736	0.0464383	0.949469	0.0145298	0.0447388
0.5373	1.04999	0.605668	1.05701	1.05456	0.0760421	0.176184		0.971238	0.668293	0.962531	0.975758	0.132341	0.0132166		0.946216	0.0467088	0.0464383	0.949297	0.0145298	0.0447388
0.5383	1.04957	0.606675	1.0563	1.05367	0.0758774	0.176184		0.971535	0.667512	0.962867	0.975647	0.126346	0.0137716		0.946148	0.0467764	0.046506	0.947586	0.0143587	0.0447388
0.5393	1.04893	0.607205	1.05552	1.05298	0.0757541	0.176876		0.971685	0.667399	0.962086	0.976091	0.124569	0.0138827		0.946352	0.0469793	0.0466412	0.947844	0.0142731	0.0446532
0.5403	1.04851	0.608371	1.05538	1.05402	0.0760008	0.177469		0.972132	0.668628	0.962755	0.975314	0.121239	0.0134386		0.946827	0.0469793	0.0467088	0.9475	0.0141875	0.0450811
0.5413	1.04782	0.608424	1.05517	1.05511	0.0765361	0.177519		0.973024	0.668628	0.962867	0.975314	0.116021	0.0136607		0.946895	0.0471821	0.046844	0.9475	0.0144442	0.0453378
0.5423	1.0484	0.608317	1.05566	1.05589	0.0768248	0.177815		0.973322	0.664721	0.963424	0.97487	0.114134	0.0146599		0.947167	0.0471145	0.0471145	0.948266	0.0146154	0.0453378
0.5433	1.04851	0.607417	1.05595	1.05619	0.0768248	0.177519		0.972875	0.663046	0.963537	0.973649	0.11813	0.0144378		0.947975	0.0473173	0.0470469	0.950234	0.0144443	0.0452523
0.5443	1.04851	0.606939	1.05601	1.0555	0.0757955	0.176876		0.972727	0.663382	0.963871	0.974315	0.121905	0.0153259		0.947568	0.0471145	0.0469793	0.948867	0.0149577	0.0453378
0.5453	1.04866	0.605774	1.05566	1.05446	0.0745598	0.17653		0.972132	0.665056	0.963871	0.974315	0.125791	0.0154369		0.947031	0.0469117	0.0467088	0.9475	0.0153856	0.0452523
0.5463	1.04899	0.604979	1.05588	1.05446	0.0740244	0.175838		0.971982	0.666173	0.962867	0.974315	0.128344	0.0153259		0.947235	0.0467764	0.0464383	0.947328	0.0150433	0.0452523
0.5473	1.04893	0.604501	1.05601	1.05367	0.0729538	0.175888		0.971535	0.668405	0.962086	0.974315	0.13012	0.01577		0.947432	0.0467764	0.0463707	0.946984	0.0145298	0.0449099
0.5483	1.04899	0.60413	1.05623	1.05362	0.0719654	0.176679		0.970792	0.670526	0.961304	0.974315	0.133784	0.0148819		0.947772	0.046844	0.0467088	0.946898	0.0149577	0.0449099
0.5493	1.04893	0.603494	1.05637	1.05421	0.0713477	0.176629		0.970345	0.670637	0.96041	0.975314	0.134894	0.0151039		0.948383	0.0469793	0.0467088	0.94818	0.014701	0.0448244
0.5503	1.04967	0.602223	1.05694	1.05476	0.072542	0.176728		0.970495	0.671418	0.960746	0.974426	0.133895	0.015548		0.94892	0.046844	0.0465736	0.947758	0.0147866	0.0448244
0.5513	1.04994	0.601745	1.05708	1.05515	0.0733244	0.176629		0.971685	0.671196	0.96242	0.974426	0.137447	0.0153259		0.948247	0.0465736	0.0464383	0.946984	0.0146154	0.0447388
0.5523	1.04988	0.602434	1.05686	1.05559	0.0722949	0.176283		0.972577	0.669856	0.963201	0.97487	0.137558	0.0153259		0.948654	0.0467088	0.0464383	0.946555	0.014701	0.0442253
0.5533	1.04973	0.603601	1.05694	1.05545	0.0712241	0.176481		0.97347	0.667065	0.964318	0.974536	0.135338	0.0158811		0.949463	0.0468441	0.0466412	0.947672	0.014701	0.0440541
0.5543	1.04994	0.603706	1.05729	1.05599	0.0715124	0.177321		0.972875	0.666061	0.964207	0.973759	0.13334	0.01577		0.94892	0.0469793	0.0467764	0.947586	0.0145298	0.044482
0.5553	1.05052	0.603812	1.05764	1.05674	0.0721713	0.177568		0.972429	0.665167	0.963648	0.973649	0.131564	0.0148819		0.948383	0.0467764	0.0467088	0.945359	0.0146154	0.044482
0.5563	1.05041	0.603706	1.05771	1.05609	0.0730361	0.177371		0.971833	0.66461	0.962867	0.974093	0.130786	0.0143268		0.948111	0.0470469	0.0467764	0.94382	0.0145298	0.0449099
0.5573	1.05026	0.603494	1.05778	1.05594	0.0729538	0.177519		0.971833	0.664497	0.961861	0.973759	0.131897	0.0147708		0.948247	0.0468441	0.0466412	0.9445	0.0146154	0.0443965
0.5583	1.05047	0.604025	1.0575	1.05609	0.0729126	0.177667		0.971982	0.664721	0.96242	0.973538	0.132785	0.0152149		0.948519	0.0465736	0.0464383	0.945961	0.0148722	0.0443109
0.5593	1.05052	0.604926	1.05764	1.05614	0.0731596	0.177667		0.972132	0.66461	0.962308	0.973427	0.133673	0.0138827		0.94892	0.0465736	0.0463707	0.944414	0.0151289	0.044482
0.5603	1.05041	0.605137	1.05814	1.05634	0.0736126	0.17826		0.97228	0.664721	0.962197	0.973204	0.130564	0.0131055		0.949056	0.0469117	0.0465736	0.944844	0.0151289	0.0450811
0.5613	1.05068	0.605137	1.05814	1.05693	0.0731184	0.178408		0.973768	0.664386	0.963537	0.97265	0.129787	0.0136607		0.948852	0.0471145	0.0469117	0.94493	0.0150433	0.0449955
0.5623	1.05031	0.605297	1.05715	1.05649	0.0721714	0.177469		0.974512	0.665167	0.964429	0.973093	0.131453	0.0154369		0.94892	0.0471145	0.0470469	0.945359	0.0147866	0.0452523
0.5633	1.04994	0.604872	1.05665	1.05644	0.0721713	0.176926		0.973173	0.665948	0.963424	0.972872	0.133451	0.0163251		0.948852	0.0468441	0.0467764	0.946469	0.0147866	0.0457657
0.5643	1.05005	0.604661	1.05694	1.05589	0.0735714	0.177222		0.971238	0.667846	0.962086	0.973538	0.132785	0.0162141		0.949327	0.046844	0.0464383	0.946812	0.0147866	0.0452523
0.5653	1.04967	0.605085	1.05679	1.05574	0.0750128	0.178359		0.97094	0.669186	0.961973	0.974315	0.132563	0.015548		0.950883	0.0466412	0.0465736	0.945445	0.0147866	0.0452523
0.5663	1.0493	0.606145	1.05651	1.05565	0.0756714	0.179002		0.970643	0.669967	0.961973	0.97387	0.132341	0.0152149		0.951358	0.0469117	0.0466412	0.944414	0.0153	0.0454234
0.5673	1.04888	0.605774	1.0563	1.05525	0.0746833	0.178556		0.970196	0.669409	0.961639	0.97387	0.131564	0.0154369		0.951759	0.0468441	0.0467764	0.945875	0.0151289	0.0451666
0.5683	1.04904	0.605774	1.05608	1.05495	0.0734067	0.17742		0.971238	0.668293	0.96242	0.972982	0.126235	0.0146599		0.952574	0.0467764	0.0466412	0.946383	0.0151289	0.0452523
0.5693	1.04904	0.605297	1.05588	1.0549	0.0725831	0.176876		0.973768	0.666842	0.964207	0.972316	0.122127	0.0131055		0.951358	0.0465736	0.0463707	0.947844	0.0152145	0.0452523
0.5703	1.04893	0.604554	1.05623	1.05501	0.073242	0.176777		0.974512	0.665948	0.964764	0.972982	0.12357	0.0113292		0.950204	0.046506	0.0463707	0.950148	0.0147866	0.0449099
0.5713	1.04941	0.603388	1.05651	1.0554	0.0733244	0.176679		0.974512	0.666173	0.964429	0.972316	0.132563	0.0115513		0.949395	0.0463707	0.0461678	0.95032	0.0151289	0.0449099
0.5723	1.04983	0.603601	1.05679	1.05574	0.0747244	0.176382		0.974364	0.66673	0.963537	0.971761	0.137115	0.0125504		0.948784	0.0465736	0.0465736	0.950234	0.0151289	0.0450811
0.5733	1.04962	0.60413	1.05679	1.05624	0.0757541	0.176629		0.973917	0.666395	0.963313	0.971318	0.135893	0.0124394		0.948451	0.0467088	0.0464383	0.94818	0.014701	0.0449099
0.5743	1.04893	0.604714	1.05623	1.05629	0.0751362	0.176777		0.973768	0.665167	0.962867	0.971095	0.134117	0.0134387		0.948519	0.0466412	0.0464383	0.946641	0.014701	0.0449099
0.5753	1.04967	0.605032	1.05672	1.05668	0.0753421	0.17742		0.973322	0.664721	0.962978	0.971761	0.131786	0.0144378		0.949327	0.0463031	0.0463031	0.945445	0.0143587	0.0454234
0.5763	1.0501	0.605561	1.05708	1.05674	0.0751774	0.178013		0.972727	0.665167	0.962643	0.971873	0.130231	0.0146599		0.949056	0.0467764	0.046506	0.9445	0.0145298	0.0450811
0.5773	1.05015	0.606568	1.05722	1.05599	0.0759188	0.177568		0.971387	0.664386	0.961861	0.971207	0.129121	0.0147708		0.949327	0.0469793	0.0467764	0.944164	0.0144442	0.0451666
0.5783	1.04994	0.606834	1.05679	1.0558	0.0757955	0.176629		0.970495	0.663827	0.961416	0.970984	0.130676	0.0143268		0.951086	0.0469117	0.0468441	0.945617	0.0145298	0.0451666
0.5793	1.04994	0.606781	1.05686	1.05589	0.0756714	0.176382		0.970048	0.664833	0.961192	0.971984	0.134561	0.0139936		0.951895	0.0472498	0.0470469	0.950234	0.014701	0.0451666
0.5803	1.0501	0.606993	1.05715	1.05609	0.0751363	0.17658		0.969601	0.665614	0.961304	0.97387	0.136227	0.0133276		0.951562	0.0471145	0.0470469	0.953492	0.0148721	0.0449955
0.5813	1.04967	0.606993	1.05686	1.05599	0.0743538	0.176432		0.968857	0.666173	0.960969	0.973093	0.135449	0.0129945		0.950543	0.0471821	0.046844	0.95357	0.0149577	0.0451666
0.5823	1.04952	0.606197	1.05644	1.05703	0.0749304	0.176975		0.970048	0.667177	0.96108	0.972538	0.135005	0.0132165		0.949123	0.0469793	0.0468441	0.952031	0.0147866	0.0449099
0.5833	1.04973	0.605774	1.05651	1.05674	0.0760421	0.177173		0.970197	0.668293	0.960857	0.972316	0.134339	0.0127725		0.948111	0.0467764	0.046506	0.948953	0.014701	0.0449955
0.5843	1.04967	0.605826	1.05651	1.05535	0.0752602	0.176679		0.971387	0.66673	0.961416	0.972538	0.133562	0.0127725		0.94784	0.0465059	0.0463707	0.945875	0.0143587	0.0450811
0.5853	1.04952	0.605615	1.05708	1.05466	0.074148	0.176184		0.973024	0.665614	0.962531	0.972316	0.13334	0.0125505		0.947772	0.0467764	0.046506	0.945445	0.0146154	0.0451666
0.5863	1.04994	0.605403	1.05743	1.05495	0.0732008	0.175888		0.972727	0.666395	0.962086	0.972427	0.13112	0.0125504		0.948383	0.0468441	0.0465736	0.946898	0.0148721	0.0453378
0.5873	1.04999	0.604501	1.0575	1.05545	0.0723772	0.176678		0.972132	0.666284	0.96175	0.973204	0.131231	0.0126615		0.948784	0.046844	0.0467088	0.946469	0.0146154	0.0454234
0.5883	1.05031	0.604501	1.0575	1.0557	0.0726655	0.17653		0.970495	0.665726	0.960746	0.973315	0.133007	0.0123284		0.949463	0.0469117	0.0469117	0.945102	0.0146154	0.0453378
0.5893	1.05021	0.604819	1.05757	1.0558	0.0732832	0.17574		0.970345	0.665948	0.960969	0.973981	0.133673	0.0123284		0.950204	0.0469793	0.0467088	0.942875	0.0147866	0.0448244
0.5903	1.04999	0.605244	1.05736	1.05589	0.0746832	0.174949		0.970345	0.668293	0.960746	0.972872	0.134561	0.0121064		0.95034	0.0468441	0.0466412	0.94382	0.0143587	0.0447388
0.5913	1.04973	0.605137	1.05686	1.05629	0.0743539	0.174949		0.96975	0.66952	0.960635	0.972427	0.133229	0.0122174		0.950883	0.0467088	0.0466412	0.945359	0.0145298	0.0446532
0.5923	1.04935	0.605297	1.0563	1.05644	0.0744774	0.174603		0.970197	0.668182	0.960299	0.972205	0.133007	0.0126615		0.951154	0.0469793	0.046844	0.946727	0.014701	0.0445677
0.5933	1.04967	0.605508	1.05686	1.05723	0.0739832	0.175048		0.971982	0.667065	0.961861	0.972982	0.131675	0.0132166		0.950543	0.0469117	0.0467088	0.946555	0.0148721	0.044482
0.5943	1.0501	0.605508	1.05708	1.05753	0.0734479	0.17653		0.972577	0.665167	0.962531	0.973093	0.130676	0.0141047		0.949327	0.0469117	0.0467088	0.946047	0.014701	0.0445677
0.5953	1.05036	0.605615	1.05743	1.05767	0.0737774	0.177222		0.971833	0.66327	0.962197	0.973316	0.129676	0.0145488		0.949259	0.0471145	0.0466412	0.945875	0.0145298	0.0448244
0.5963	1.05026	0.605032	1.05694	1.05743	0.0745186	0.177519		0.971238	0.663827	0.961192	0.972982	0.128233	0.0145488		0.94987	0.046844	0.0465736	0.946812	0.0143587	0.0449099
0.5973	1.05005	0.605244	1.05679	1.05634	0.0754248	0.177667		0.970792	0.665056	0.96108	0.971872	0.126235	0.0137716		0.951086	0.0468441	0.0467088	0.949297	0.0143587	0.0449099
0.5983	1.04978	0.605986	1.05615	1.05584	0.0753835	0.177371		0.971238	0.666842	0.961192	0.971428	0.122682	0.0141047		0.952099	0.0470469	0.0467088	0.949727	0.0141875	0.0451666
0.5993	1.04909	0.605933	1.05595	1.05599	0.0747245	0.176926		0.97094	0.666284	0.960522	0.971428	0.120018	0.0145488		0.953049	0.0471145	0.0469117	0.949039	0.0144442	0.0453378
0.6003	1.04866	0.605455	1.05608	1.05614	0.0738597	0.177074		0.970792	0.665503	0.960635	0.971207	0.121128	0.0145488		0.953247	0.0470469	0.0468441	0.947758	0.0148721	0.0454234
0.6013	1.04851	0.605085	1.05574	1.05723	0.0727067	0.17653		0.969303	0.666507	0.959406	0.970762	0.126901	0.0139936		0.95271	0.0470469	0.0466412	0.948523	0.0151289	0.0450811
0.6023	1.04904	0.605403	1.05574	1.05732	0.0730773	0.176777		0.96856	0.668181	0.958848	0.972316	0.12901	0.0142158		0.952031	0.0469793	0.0465736	0.949039	0.0151289	0.0453378
0.6033	1.04994	0.605986	1.05651	1.05649	0.0737362	0.177123		0.968857	0.667958	0.958625	0.972316	0.129787	0.0141047		0.952846	0.0467088	0.0464383	0.95075	0.0147866	0.0454234
0.6043	1.05047	0.606251	1.05665	1.05559	0.0749716	0.176629		0.970345	0.669075	0.960522	0.971984	0.129121	0.0138827		0.952914	0.0464383	0.0461002	0.953063	0.0147866	0.0452523
0.6053	1.05036	0.606357	1.05679	1.0555	0.0757955	0.175641		0.971535	0.670414	0.961861	0.971207	0.128899	0.0141047		0.952642	0.0463707	0.0462355	0.955711	0.0147866	0.0449955
0.6063	1.04999	0.605403	1.05665	1.0554	0.0750951	0.176234		0.971535	0.670302	0.961416	0.970984	0.127789	0.0152149		0.952302	0.0465736	0.0463031	0.954945	0.0147866	0.0450811
0.6073	1.05026	0.604395	1.05736	1.05515	0.0750127	0.176876		0.971982	0.669856	0.961527	0.970096	0.128788	0.0142157		0.952235	0.0464383	0.0463031	0.952805	0.0145298	0.0451666
0.6083	1.0511	0.603866	1.05821	1.05535	0.0748892	0.176975		0.971685	0.667735	0.961304	0.970428	0.131564	0.0143268		0.952642	0.0466412	0.0463707	0.951438	0.014701	0.0449955
0.6093	1.05179	0.604343	1.05934	1.05629	0.0755895	0.177123		0.971833	0.666284	0.961527	0.970318	0.133673	0.0142158		0.952846	0.0468441	0.0465736	0.949812	0.0149577	0.0446532
0.6103	1.05163	0.605826	1.05948	1.05708	0.0764541	0.177173		0.971535	0.665056	0.96108	0.970096	0.133118	0.0149928		0.953383	0.0467764	0.0467088	0.948695	0.0147866	0.0450811
0.6113	1.05163	0.605933	1.05912	1.05728	0.0772774	0.177568		0.970345	0.665503	0.96041	0.970428	0.130454	0.0152149		0.953049	0.0467764	0.0465736	0.949469	0.014701	0.0450811
0.6123	1.05148	0.605297	1.05885	1.05732	0.0771955	0.177271		0.969601	0.665167	0.960299	0.970984	0.127567	0.0152149		0.953111	0.0469793	0.0467088	0.949555	0.0142731	0.0450811
0.6133	1.05084	0.604766	1.05849	1.05743	0.0762481	0.177074		0.96856	0.665167	0.959629	0.970873	0.126124	0.0151039		0.953519	0.0467764	0.0466412	0.951438	0.0144442	0.0453378
0.6143	1.05021	0.604555	1.05792	1.05757	0.0759188	0.176432		0.96856	0.663716	0.959406	0.970541	0.124791	0.0149928		0.952574	0.0469117	0.0467088	0.952547	0.0143587	0.0453378
0.6153	1.05026	0.604555	1.05799	1.05728	0.0754248	0.175641		0.969005	0.664163	0.959629	0.971207	0.124236	0.0144378		0.951019	0.046506	0.0464383	0.952891	0.0143587	0.0452523
0.6163	1.04988	0.604661	1.05778	1.05683	0.0750128	0.175246		0.969303	0.665726	0.959965	0.970762	0.125236	0.0145488		0.950951	0.046844	0.046506	0.952633	0.0143587	0.0452523
0.6173	1.04904	0.605668	1.05665	1.05589	0.0751774	0.175196		0.969005	0.665391	0.960076	0.970428	0.128011	0.0152149		0.952099	0.0467088	0.0464383	0.952117	0.0147866	0.0452523
0.6183	1.04851	0.606834	1.05588	1.05605	0.0745598	0.176036		0.969452	0.665948	0.960857	0.970096	0.130453	0.0153259		0.952846	0.0467764	0.0463707	0.951773	0.0146154	0.0448244
0.6193	1.0483	0.606622	1.05574	1.0558	0.0743538	0.177222		0.969303	0.665948	0.960635	0.970096	0.131342	0.0146599		0.952099	0.0466412	0.0465736	0.952977	0.014701	0.0447388
0.6203	1.04893	0.605879	1.0563	1.05599	0.0753835	0.17742		0.967666	0.666061	0.959071	0.970207	0.135338	0.0143268		0.952167	0.0467764	0.0464383	0.953914	0.0148721	0.0447388
0.6213	1.04941	0.605879	1.05686	1.05663	0.0754248	0.176481		0.96841	0.665391	0.959183	0.970318	0.137558	0.0132166		0.953049	0.0467088	0.046506	0.954086	0.014701	0.0449099
0.6223	1.04946	0.606463	1.05672	1.05634	0.0764541	0.176332		0.96975	0.666395	0.959853	0.970762	0.135782	0.0126614		0.953722	0.0467088	0.0463707	0.953656	0.0147866	0.0449099
0.6233	1.04973	0.606939	1.05715	1.05644	0.0764128	0.175542		0.969898	0.667065	0.959852	0.970541	0.134339	0.0134386		0.953994	0.0469117	0.0467088	0.953406	0.0148722	0.0450811
0.6243	1.04988	0.60641	1.05722	1.05609	0.0750539	0.174702		0.96975	0.667177	0.959965	0.970873	0.133229	0.0145488		0.954198	0.0469117	0.0466412	0.953828	0.0149577	0.0449099
0.6253	1.04988	0.605561	1.05722	1.0557	0.0737773	0.174899		0.970048	0.667512	0.960187	0.970096	0.135116	0.014993		0.954198	0.0468441	0.0467764	0.952289	0.0149577	0.0447388
0.6263	1.04983	0.604661	1.05708	1.05559	0.0751362	0.175641		0.97094	0.668851	0.960857	0.970096	0.135893	0.0146599		0.953383	0.046844	0.0466412	0.95032	0.0148721	0.0447388
0.6273	1.04946	0.604608	1.05623	1.05653	0.0754654	0.176728		0.971535	0.668628	0.961304	0.969651	0.134672	0.0134386		0.952506	0.0470469	0.0467088	0.949977	0.0146154	0.0449099
0.6283	1.04919	0.605668	1.05566	1.05674	0.0757541	0.176827		0.970197	0.665614	0.96041	0.970096	0.134894	0.0128835		0.952099	0.0468441	0.0466412	0.950492	0.0141875	0.0449955
0.6293	1.04872	0.60625	1.05559	1.05649	0.0751774	0.176432		0.969898	0.664386	0.959406	0.970541	0.134228	0.0136607		0.952302	0.0468441	0.0466412	0.951094	0.0142731	0.0453378
0.6303	1.04919	0.605668	1.05601	1.05639	0.0739008	0.176332		0.970197	0.664274	0.959406	0.971539	0.127567	0.0142158		0.953383	0.0465736	0.0464383	0.951352	0.0146154	0.0457657
0.6313	1.04983	0.605032	1.05658	1.05624	0.0726244	0.17658		0.970197	0.665056	0.95974	0.971207	0.12679	0.0146599		0.953858	0.0466412	0.0462355	0.951609	0.014701	0.0454234
0.6323	1.05021	0.604554	1.05679	1.05649	0.072542	0.177025		0.970643	0.667177	0.959853	0.971095	0.128788	0.0144378		0.953049	0.0467764	0.0465736	0.950578	0.0148721	0.045509
0.6333	1.05041	0.604501	1.05686	1.05693	0.0725008	0.176679		0.969601	0.667399	0.958736	0.971318	0.129899	0.0142158		0.952438	0.0469793	0.0467764	0.950664	0.0147866	0.045509
0.6343	1.05041	0.603919	1.05729	1.05649	0.0721302	0.176432		0.969452	0.667624	0.959295	0.970984	0.131342	0.0135496		0.952167	0.0470469	0.0469117	0.95075	0.0149577	0.0452523
0.6353	1.05079	0.603283	1.05785	1.05584	0.0727067	0.175789		0.970197	0.668293	0.95974	0.970651	0.131119	0.0145488		0.952506	0.0471821	0.0469793	0.950492	0.0146154	0.0449955
0.6363	1.04999	0.603706	1.05722	1.05605	0.073242	0.175838		0.969601	0.668181	0.959518	0.970318	0.132008	0.0152149		0.952642	0.0471821	0.0469117	0.952203	0.0143587	0.0449099
0.6373	1.04983	0.603601	1.05701	1.05653	0.0741068	0.176184		0.968708	0.667512	0.958401	0.968985	0.133007	0.0149928		0.952778	0.0470469	0.0467764	0.951523	0.0144442	0.0452523
0.6383	1.04973	0.603283	1.05729	1.05713	0.074148	0.176777		0.968113	0.665726	0.957397	0.968874	0.138003	0.015992		0.952778	0.0466412	0.0465736	0.951773	0.0144443	0.0451666
0.6393	1.05026	0.603548	1.05785	1.05772	0.0741892	0.176234		0.967963	0.664497	0.958067	0.969985	0.142443	0.0166581		0.953111	0.0469117	0.0466412	0.951609	0.0143587	0.0452523
0.6403	1.05074	0.604025	1.05771	1.05817	0.0752188	0.175492		0.96841	0.665056	0.958067	0.970096	0.142888	0.0161031		0.953586	0.046844	0.0466412	0.952375	0.0143587	0.0454234
0.6413	1.0511	0.604077	1.05785	1.05826	0.0758774	0.17569		0.968708	0.665167	0.958625	0.969764	0.143776	0.0156589		0.95379	0.0469117	0.046844	0.953234	0.0148721	0.0452523
0.6423	1.05169	0.603601	1.05821	1.05792	0.0759188	0.176332		0.970197	0.664497	0.959629	0.970428	0.141777	0.0154369		0.953247	0.0471145	0.0467764	0.954086	0.0147866	0.0451666
0.6433	1.05195	0.604608	1.0587	1.05713	0.0763308	0.175938		0.970197	0.662712	0.96041	0.970207	0.138447	0.0149928		0.953519	0.0471145	0.0469117	0.954086	0.0148722	0.0450811
0.6443	1.05216	0.604979	1.05842	1.05688	0.0760421	0.174603		0.969303	0.664163	0.95974	0.970207	0.134561	0.0135496		0.954599	0.0471821	0.0469793	0.954773	0.0149577	0.0451666
0.6453	1.05195	0.605297	1.05863	1.05698	0.0755481	0.174159		0.968261	0.666173	0.958848	0.969874	0.133007	0.0131055		0.955074	0.0471145	0.046844	0.955117	0.0151289	0.0452523
0.6463	1.05074	0.605244	1.05792	1.05653	0.0745186	0.174603		0.967368	0.66673	0.957285	0.969985	0.131009	0.0131055		0.955346	0.0470469	0.0469793	0.955117	0.0152145	0.0454234
0.6473	1.05079	0.604714	1.05821	1.05688	0.0735302	0.175789		0.966476	0.667958	0.956504	0.970984	0.130564	0.0132166		0.955957	0.0471821	0.0467764	0.954773	0.0148721	0.0452523
0.6483	1.051	0.605297	1.05856	1.05762	0.0727478	0.176728		0.965731	0.668405	0.956504	0.970541	0.130564	0.0125504		0.955957	0.0469793	0.0467088	0.953914	0.0147866	0.0449955
0.6493	1.05115	0.605986	1.05877	1.05876	0.0727478	0.177667		0.965285	0.665948	0.956727	0.969651	0.13112	0.0118843		0.956426	0.0469117	0.046506	0.954773	0.0149577	0.0449099
0.6503	1.0511	0.605615	1.05885	1.05916	0.0716359	0.177914		0.966326	0.663158	0.956615	0.969097	0.135561	0.0116623		0.956154	0.0467088	0.0465059	0.955711	0.0150433	0.0448244
0.6513	1.05105	0.604501	1.0587	1.0592	0.0715536	0.177963		0.966773	0.662265	0.956838	0.969874	0.141445	0.0135496		0.956222	0.0469117	0.0466412	0.956656	0.0147866	0.0454234
0.6523	1.05052	0.60413	1.05806	1.0595	0.0718419	0.17742		0.966476	0.661931	0.956615	0.970651	0.143331	0.0144378		0.956358	0.0470469	0.0469117	0.957086	0.0145298	0.0454234
0.6533	1.05031	0.603865	1.05764	1.05891	0.0734068	0.176036		0.966326	0.662154	0.956951	0.970762	0.140445	0.0153259		0.956833	0.0469117	0.0467764	0.956227	0.0142731	0.0453378
0.6543	1.05031	0.603441	1.0575	1.05826	0.0742715	0.175097		0.966625	0.665056	0.956393	0.971095	0.137781	0.0145488		0.956025	0.0467088	0.046506	0.953148	0.0146154	0.0455945
0.6553	1.05026	0.604237	1.05764	1.05836	0.0758361	0.175048		0.966625	0.666954	0.956615	0.970873	0.135782	0.0142157		0.956358	0.0469117	0.0465736	0.951773	0.0147866	0.0457657
0.6563	1.05047	0.605137	1.05708	1.05822	0.0757541	0.17574		0.966476	0.666061	0.957174	0.970096	0.134894	0.0136607		0.956562	0.0471145	0.0467764	0.951352	0.0144442	0.045509
0.6573	1.05052	0.606357	1.05722	1.05792	0.0746421	0.175641		0.967071	0.663716	0.95762	0.969651	0.133562	0.0134386		0.956222	0.0469793	0.0469793	0.950406	0.0145298	0.045509
0.6583	1.05095	0.606622	1.05743	1.05713	0.0740656	0.175344		0.96722	0.661595	0.95762	0.968985	0.133784	0.0137716		0.955414	0.0469793	0.0467764	0.950148	0.0145298	0.0454234
0.6593	1.0511	0.606939	1.05771	1.05634	0.073242	0.175592		0.966625	0.661595	0.956838	0.969764	0.133451	0.0137716		0.954599	0.0469117	0.0468441	0.95075	0.0143587	0.0454234
0.6603	1.05089	0.606675	1.05771	1.05713	0.0731185	0.176432		0.96722	0.662376	0.956727	0.971095	0.138114	0.0136607		0.954537	0.0470469	0.0466412	0.951695	0.0145298	0.0453378
0.6613	1.05089	0.606145	1.05743	1.05777	0.0735714	0.176629		0.967368	0.663158	0.956393	0.971872	0.145996	0.0151039		0.954265	0.0468441	0.046506	0.952203	0.0149577	0.0449099
0.6623	1.05132	0.605615	1.05821	1.05757	0.0752188	0.176332		0.96722	0.66461	0.956168	0.97165	0.146884	0.0158811		0.955006	0.0467764	0.0463707	0.952719	0.0152145	0.0449099
0.6633	1.05185	0.605137	1.05899	1.05698	0.0757955	0.176827		0.967071	0.665056	0.956168	0.970651	0.142332	0.0151039		0.956086	0.0466412	0.0464383	0.953914	0.0154712	0.0449099
0.6643	1.05174	0.605826	1.05905	1.05668	0.0751363	0.176481		0.967518	0.664052	0.957174	0.970762	0.138447	0.0142158		0.957105	0.046844	0.046506	0.955453	0.0154712	0.0452523
0.6653	1.05179	0.60641	1.05885	1.05678	0.0746833	0.176234		0.968113	0.663605	0.958067	0.970873	0.135893	0.0123284		0.957241	0.0469117	0.0467088	0.954344	0.0152145	0.0449955
0.6663	1.05169	0.606568	1.05892	1.05772	0.0753421	0.17569		0.96722	0.661931	0.957397	0.970762	0.134006	0.0118843		0.957642	0.0467764	0.046506	0.952117	0.0148721	0.045509
0.6673	1.05142	0.607257	1.0587	1.05847	0.0757541	0.175838		0.966476	0.660702	0.956504	0.970428	0.132452	0.0123284		0.957241	0.0469117	0.0466412	0.951859	0.0144443	0.0454234
0.6683	1.0511	0.60747	1.0587	1.05817	0.0756714	0.17574		0.96722	0.660814	0.957844	0.969319	0.13545	0.0128835		0.957914	0.0467088	0.046506	0.953148	0.0143587	0.0451666
0.6693	1.05132	0.607205	1.05934	1.05792	0.0751775	0.175838		0.967815	0.661372	0.958625	0.969208	0.136227	0.0129945		0.958321	0.046844	0.0465736	0.954172	0.014701	0.0448244
0.6703	1.05185	0.606728	1.05969	1.05792	0.0753008	0.17653		0.969155	0.663827	0.959518	0.969651	0.13445	0.0131055		0.958049	0.0467088	0.0465736	0.955289	0.0145298	0.0446532
0.6713	1.05237	0.606092	1.06005	1.05728	0.073489	0.17742		0.969155	0.665279	0.95974	0.970318	0.131896	0.0132166		0.957037	0.0469117	0.0466412	0.954945	0.0144442	0.0447388
0.6723	1.05195	0.605986	1.05892	1.05653	0.0705241	0.177667		0.96856	0.66673	0.959629	0.96943	0.129676	0.0137716		0.956426	0.0471821	0.0466412	0.954172	0.0142731	0.044482
0.6733	1.05163	0.605032	1.05792	1.05747	0.0683004	0.17653		0.967368	0.666618	0.958736	0.968985	0.129454	0.0143268		0.956562	0.0472498	0.0468441	0.952633	0.014701	0.0448244
0.6743	1.05121	0.604661	1.05722	1.05777	0.066612	0.175888		0.967666	0.666061	0.958514	0.969319	0.128455	0.0144378		0.957981	0.0470469	0.0467764	0.952977	0.0147866	0.0452523
0.6753	1.05021	0.605297	1.05615	1.05797	0.0674768	0.175147		0.968113	0.666173	0.958401	0.969651	0.129676	0.0142157		0.959469	0.0469117	0.0467764	0.956141	0.0144442	0.0452523
0.6763	1.04914	0.605668	1.05531	1.05743	0.0692064	0.175048		0.96722	0.666061	0.957397	0.969097	0.129121	0.0144377		0.96042	0.0469793	0.0466412	0.958797	0.0144443	0.0454234
0.6773	1.04919	0.604661	1.05531	1.05738	0.0703182	0.175888		0.966029	0.667624	0.956281	0.969319	0.129232	0.0143268		0.96008	0.0469117	0.0465736	0.959648	0.0144443	0.0454234
0.6783	1.04952	0.602965	1.05595	1.05743	0.0708535	0.176086		0.965583	0.668182	0.955164	0.968653	0.131564	0.015548		0.958728	0.0465736	0.0464383	0.95982	0.0148721	0.0453378
0.6793	1.05015	0.602541	1.05729	1.05723	0.0716359	0.176283		0.965136	0.665503	0.954272	0.96832	0.132896	0.0166581		0.957981	0.0466412	0.0464383	0.958195	0.0147866	0.0458513
0.6803	1.05084	0.603866	1.05806	1.05683	0.0725832	0.176728		0.963796	0.662601	0.953379	0.966988	0.131231	0.0176573		0.957778	0.0467088	0.046506	0.956313	0.0142731	0.0457657
0.6813	1.0511	0.605826	1.05856	1.05683	0.0724595	0.176432		0.964243	0.661707	0.954383	0.965545	0.130787	0.0172132		0.957574	0.0468441	0.0466412	0.954	0.0146154	0.0455945
0.6823	1.05132	0.606834	1.05863	1.05688	0.072789	0.176086		0.964988	0.660368	0.955611	0.966211	0.130009	0.0165472		0.956426	0.0467764	0.0467764	0.951945	0.0148721	0.0452523
0.6833	1.05126	0.607152	1.05835	1.05678	0.0736126	0.176332		0.964988	0.65847	0.955946	0.966654	0.129121	0.0153259		0.956154	0.0469793	0.0467088	0.95075	0.0147866	0.0451666
0.6843	1.051	0.60641	1.05757	1.05708	0.0733656	0.176283		0.966178	0.658806	0.956615	0.967209	0.129343	0.0141047		0.95521	0.0469117	0.046844	0.949891	0.0145298	0.0451666
0.6853	1.05132	0.605561	1.05806	1.05718	0.0721302	0.176135		0.966773	0.661484	0.957508	0.969208	0.12901	0.0138827		0.954802	0.0466412	0.046506	0.952977	0.0146154	0.0445677
0.6863	1.05195	0.604926	1.05926	1.05762	0.0720066	0.175986		0.967815	0.662154	0.958402	0.969208	0.1279	0.0144378		0.954537	0.0469117	0.0465059	0.955539	0.0141875	0.0445677
0.6873	1.05254	0.604872	1.06012	1.05753	0.0726243	0.175492		0.968262	0.664609	0.958289	0.969319	0.128011	0.0151039		0.956222	0.0468441	0.0467088	0.956313	0.0146154	0.0445677
0.6883	1.05222	0.604979	1.05969	1.05753	0.0724595	0.175789		0.967963	0.664721	0.958736	0.968653	0.125902	0.0158811		0.957512	0.0467764	0.046506	0.954	0.0151289	0.0450811
0.6893	1.0519	0.604926	1.05948	1.05757	0.0729538	0.176234		0.967815	0.663382	0.959071	0.96832	0.127678	0.0154369		0.957914	0.0468441	0.046506	0.954602	0.0151289	0.0450811
0.6903	1.05115	0.604926	1.05856	1.05836	0.0730361	0.176728		0.967815	0.663827	0.959853	0.967876	0.133229	0.0146599		0.957309	0.0468441	0.0467764	0.955203	0.0153856	0.0452523
0.6913	1.05068	0.605297	1.05785	1.05847	0.0729126	0.176036		0.967815	0.66461	0.959406	0.966988	0.134228	0.0141047		0.956358	0.0469793	0.0467088	0.956313	0.0152145	0.045509
0.6923	1.05047	0.605297	1.05778	1.05891	0.072789	0.175986		0.967368	0.665726	0.958289	0.967209	0.131453	0.0138827		0.956698	0.0470469	0.0467088	0.957766	0.0150433	0.045509
0.6933	1.051	0.60519	1.05842	1.05891	0.0726655	0.176382		0.966476	0.666507	0.957732	0.968097	0.13012	0.0141047		0.957642	0.0469117	0.0466412	0.958969	0.0150433	0.0447388
0.6943	1.05137	0.605297	1.05885	1.05832	0.0719654	0.176332		0.965433	0.668739	0.956504	0.968542	0.129232	0.0141047		0.958253	0.0469117	0.0467764	0.957508	0.0151289	0.0449099
0.6953	1.05148	0.605986	1.05906	1.05847	0.0714713	0.176036		0.964838	0.670637	0.955834	0.968542	0.12901	0.0144378		0.957914	0.0469117	0.0468441	0.958453	0.0151289	0.0449099
0.6963	1.05142	0.606993	1.05842	1.05866	0.0720889	0.176135		0.964838	0.671084	0.955611	0.967986	0.129898	0.0139936		0.958321	0.0471821	0.0470469	0.958969	0.0150433	0.0451666
0.6973	1.05142	0.608	1.05806	1.05851	0.0731596	0.177123		0.965583	0.669856	0.955946	0.96732	0.132452	0.0142157		0.958932	0.047385	0.0471821	0.958023	0.014701	0.0454234
0.6983	1.05153	0.608265	1.05835	1.05876	0.0743539	0.177469		0.966178	0.666284	0.956393	0.966543	0.133895	0.0142157		0.958253	0.0472498	0.0470469	0.956742	0.0148721	0.0456802
0.6993	1.05174	0.607682	1.05863	1.05881	0.0752188	0.178507		0.966923	0.66327	0.956727	0.966654	0.135672	0.0136607		0.95771	0.0469793	0.0469117	0.958797	0.0147866	0.0453378
0.7003	1.05179	0.607364	1.05842	1.05777	0.0746833	0.178408		0.967518	0.662712	0.957508	0.967209	0.136449	0.0127725		0.956765	0.0469793	0.0467088	0.960422	0.0144443	0.0450811
0.7013	1.0519	0.607152	1.0587	1.05743	0.0736126	0.177815		0.966625	0.662935	0.956838	0.966543	0.13445	0.0135496		0.957037	0.0469793	0.0467764	0.959906	0.0146154	0.0449099
0.7023	1.05232	0.607523	1.05941	1.05792	0.0721714	0.177271		0.96588	0.664497	0.956504	0.965988	0.131231	0.0141047		0.958525	0.0470469	0.0466412	0.957852	0.0147866	0.0447388
0.7033	1.05248	0.607575	1.05934	1.05856	0.072542	0.176777		0.964541	0.66461	0.955499	0.965432	0.129121	0.0137716		0.958796	0.0466412	0.0463031	0.95657	0.0148721	0.0448244
0.7043	1.05248	0.606621	1.05941	1.05901	0.072789	0.17574		0.963946	0.664833	0.954942	0.964101	0.131231	0.0142158		0.958796	0.0467088	0.0463707	0.955203	0.0148721	0.0448244
0.7053	1.05169	0.605615	1.05885	1.05856	0.072542	0.1749		0.964838	0.665614	0.955946	0.963768	0.132119	0.0148819		0.958253	0.0465736	0.0463707	0.95443	0.0149577	0.0449099
0.7063	1.05121	0.605085	1.05835	1.05851	0.072995	0.174751		0.965433	0.666842	0.957285	0.963657	0.13223	0.0164362		0.958457	0.0467088	0.0467088	0.954516	0.0148721	0.0448244
0.7073	1.05084	0.604448	1.05785	1.05753	0.0727067	0.175295		0.966773	0.667958	0.957955	0.964212	0.132563	0.0165472		0.957778	0.046844	0.0466412	0.954172	0.0149577	0.0449099
0.7083	1.05047	0.604448	1.05743	1.05767	0.0727067	0.175394		0.966625	0.668739	0.957508	0.965432	0.134672	0.0165472		0.956833	0.0469117	0.0467764	0.953406	0.0148721	0.0449099
0.7093	1.05036	0.60429	1.05708	1.05836	0.072789	0.175147		0.966327	0.667958	0.95695	0.965655	0.134894	0.0156589		0.957037	0.0472498	0.0467764	0.951695	0.0152145	0.0450811
0.7103	1.05121	0.604872	1.05799	1.05886	0.0733656	0.175986		0.966624	0.665948	0.956727	0.965877	0.133118	0.015548		0.957642	0.0471821	0.0469117	0.950406	0.0149577	0.0452523
0.7113	1.05163	0.605774	1.0587	1.05935	0.0730773	0.176876		0.967071	0.664721	0.957063	0.965322	0.134339	0.0151039		0.957914	0.0471145	0.0469793	0.951523	0.0151289	0.0449955
0.7123	1.05174	0.607046	1.05885	1.0597	0.0731185	0.176926		0.967071	0.665056	0.957285	0.964768	0.135893	0.0144377		0.95913	0.0471145	0.0467088	0.951352	0.0153856	0.0449955
0.7133	1.05237	0.607682	1.05926	1.05989	0.0729949	0.177173		0.966476	0.66461	0.957174	0.964101	0.135116	0.0136607		0.959877	0.0467764	0.0467764	0.950492	0.0150433	0.0451666
0.7143	1.05243	0.607841	1.05892	1.05985	0.0730773	0.177025		0.966625	0.664833	0.957174	0.964989	0.133118	0.0142158		0.960284	0.046844	0.0469117	0.951352	0.0148721	0.0451666
0.7153	1.05206	0.607099	1.0587	1.05955	0.0727478	0.177074		0.966326	0.665167	0.956951	0.965322	0.131675	0.0141047		0.960549	0.0470469	0.0466412	0.951945	0.0147866	0.0450811
0.7163	1.05264	0.605297	1.05877	1.05901	0.0718419	0.176926		0.964988	0.664274	0.956168	0.965211	0.131231	0.0139936		0.960481	0.0469793	0.0466412	0.952203	0.0148721	0.0452523
0.7173	1.05306	0.604554	1.05919	1.05935	0.0715947	0.177223		0.963796	0.665056	0.955164	0.965766	0.132008	0.0138827		0.960148	0.0467764	0.0467088	0.953578	0.014701	0.0449099
0.7183	1.05323	0.604608	1.05962	1.0595	0.0720889	0.176629		0.963201	0.665391	0.954495	0.965877	0.132452	0.0148819		0.959401	0.0471821	0.0469117	0.953742	0.0144442	0.0445677
0.7193	1.05296	0.604926	1.05976	1.0596	0.0722537	0.175492		0.964094	0.664497	0.955164	0.965988	0.134339	0.0147708		0.959469	0.0471145	0.0468441	0.952461	0.0147866	0.0448244
0.7203	1.05301	0.605561	1.06012	1.05876	0.072789	0.175048		0.963648	0.662823	0.954717	0.966322	0.133451	0.0147708		0.959673	0.0469793	0.0467088	0.951438	0.0146154	0.0446532
0.7213	1.05328	0.605774	1.06061	1.05836	0.0726655	0.175147		0.963648	0.661707	0.954495	0.966211	0.138336	0.0152149		0.959809	0.0471145	0.0467764	0.951945	0.014701	0.0448244
0.7223	1.05338	0.605826	1.06061	1.05792	0.0725008	0.175443		0.963351	0.659921	0.955164	0.966543	0.140557	0.015215		0.959809	0.0469793	0.0469117	0.953578	0.0147866	0.0446532
0.7233	1.0527	0.606197	1.06033	1.05762	0.0720889	0.17569		0.964243	0.659029	0.955053	0.966765	0.138224	0.0142158		0.959537	0.0469793	0.0469117	0.953656	0.014701	0.0449955
0.7243	1.05275	0.605721	1.05983	1.05782	0.0728714	0.175789		0.964988	0.662935	0.955611	0.966322	0.137226	0.0139936		0.95866	0.0469793	0.0467764	0.954	0.0145298	0.0449955
0.7253	1.05153	0.605137	1.05856	1.05772	0.0735302	0.175295		0.965285	0.665503	0.955723	0.966099	0.136004	0.0149928		0.95771	0.0470469	0.0465736	0.954859	0.0142731	0.0449955
0.7263	1.0511	0.604819	1.0575	1.05836	0.0734891	0.175246		0.964391	0.665837	0.955387	0.966211	0.135893	0.0146599		0.958185	0.0467764	0.0464383	0.955797	0.0142731	0.0447388
0.7273	1.05115	0.604343	1.05778	1.05886	0.0733656	0.175443		0.964094	0.664609	0.955834	0.966543	0.134561	0.0146599		0.958932	0.0465736	0.0463031	0.956055	0.0142731	0.045509
0.7283	1.05115	0.603866	1.05778	1.0593	0.0738185	0.176086		0.963796	0.662265	0.955499	0.966876	0.133007	0.0144378		0.959673	0.0465736	0.0463707	0.955453	0.0145298	0.0456802
0.7293	1.05179	0.604661	1.05863	1.05935	0.0748068	0.176777		0.964094	0.660925	0.955499	0.966988	0.131009	0.0142157		0.96008	0.0467764	0.0464383	0.952805	0.0147866	0.045509
0.7303	1.05232	0.605986	1.05969	1.05871	0.0758361	0.177667		0.963499	0.660702	0.954495	0.966988	0.132896	0.0141047		0.959944	0.0467764	0.046844	0.952547	0.014701	0.0455945
0.7313	1.0528	0.60625	1.06047	1.05856	0.0769895	0.178556		0.962904	0.660814	0.95416	0.966322	0.136227	0.0137716		0.960284	0.0470469	0.0467764	0.95332	0.014701	0.0449955
0.7323	1.05285	0.606304	1.06075	1.05926	0.0762895	0.178853		0.963053	0.661707	0.954606	0.966988	0.136449	0.0131055		0.959401	0.0471822	0.0467764	0.953492	0.0148721	0.0449099
0.7333	1.05296	0.606039	1.06026	1.0593	0.0754654	0.178902		0.963499	0.66327	0.954383	0.96732	0.134783	0.0142157		0.960012	0.0468441	0.0468441	0.954	0.0145298	0.0451666
0.7343	1.05216	0.605986	1.05905	1.05926	0.0755068	0.178309		0.963053	0.663046	0.954383	0.967209	0.134006	0.0144378		0.960889	0.0469793	0.0465736	0.954688	0.0145298	0.0452523
0.7353	1.05047	0.605826	1.05757	1.05926	0.0754654	0.177223		0.962159	0.662712	0.953825	0.966432	0.133007	0.0148819		0.960012	0.0469117	0.0467764	0.954945	0.0144442	0.0450811
0.7363	1.04973	0.60535	1.05672	1.05891	0.0747245	0.176234		0.961861	0.664052	0.95416	0.966211	0.132674	0.0149928		0.960148	0.0470469	0.0467764	0.955203	0.0146154	0.0449955
0.7373	1.04935	0.604979	1.05658	1.05895	0.0733655	0.175196		0.962904	0.665726	0.95483	0.96732	0.133451	0.0148819		0.960753	0.0471145	0.0470469	0.955539	0.0143587	0.045509
0.7383	1.05005	0.604183	1.05701	1.05895	0.0737773	0.175048		0.964094	0.667065	0.955946	0.967876	0.133673	0.0153259		0.960549	0.0471822	0.0470469	0.955969	0.0148721	0.0452523
0.7393	1.0511	0.603919	1.05799	1.05871	0.0738185	0.175196		0.965731	0.668628	0.957063	0.967209	0.133118	0.0144378		0.959944	0.0471821	0.0471821	0.959391	0.0147866	0.0453378
0.7403	1.05179	0.604448	1.05892	1.05812	0.0725831	0.17653		0.966178	0.670414	0.956838	0.966654	0.13445	0.0145488		0.959673	0.0471821	0.0469793	0.962047	0.0149577	0.0450811
0.7413	1.05148	0.604819	1.05842	1.05802	0.0725832	0.177223		0.965136	0.672088	0.956168	0.966099	0.13334	0.0152149		0.959198	0.0471145	0.046844	0.962219	0.0150433	0.0453378
0.7423	1.05132	0.605615	1.05799	1.05851	0.0743951	0.177568		0.963796	0.674098	0.95483	0.966322	0.131564	0.0146599		0.959198	0.0469117	0.046844	0.960508	0.0150433	0.0455945
0.7433	1.05126	0.606463	1.05778	1.05822	0.0767835	0.177469		0.964094	0.673986	0.955164	0.967099	0.13012	0.0137716		0.959198	0.0467764	0.0464383	0.960078	0.0146154	0.0456802
0.7443	1.05105	0.606728	1.05757	1.05891	0.0760008	0.177519		0.964541	0.673317	0.954942	0.967542	0.13012	0.0141047		0.958932	0.0467088	0.0464383	0.958883	0.0144442	0.0456802
0.7453	1.05057	0.606568	1.0575	1.05851	0.0748892	0.177617		0.962904	0.672088	0.954272	0.966876	0.130009	0.0133275		0.958253	0.0468441	0.046506	0.958539	0.0147866	0.045509
0.7463	1.05074	0.606039	1.05743	1.05856	0.0739832	0.17742		0.961266	0.670637	0.953043	0.966211	0.13012	0.0134386		0.958321	0.046844	0.0465736	0.959391	0.0147866	0.0452523
0.7473	1.05089	0.605933	1.05785	1.05911	0.0736126	0.176876		0.960969	0.669632	0.952039	0.966211	0.130009	0.0137716		0.957506	0.0467764	0.046506	0.959391	0.0146154	0.0456802
0.7483	1.05153	0.606515	1.05828	1.05916	0.0730773	0.176876		0.960374	0.669745	0.952151	0.966211	0.125791	0.0139936		0.958049	0.0469793	0.0466412	0.959141	0.0145298	0.0453378
0.7493	1.05174	0.606834	1.05814	1.05965	0.0721714	0.177271		0.960969	0.667399	0.951815	0.964989	0.12468	0.0146599		0.958994	0.0469793	0.0469117	0.959055	0.014701	0.0451666
0.7503	1.05169	0.605879	1.05828	1.06049	0.0709771	0.177371		0.961713	0.66394	0.952485	0.964989	0.12468	0.0151039		0.958525	0.0469793	0.0467764	0.959562	0.0148721	0.045509
0.7513	1.05169	0.604979	1.05842	1.06079	0.0719242	0.176975		0.962308	0.662042	0.952821	0.964655	0.121794	0.0152149		0.957377	0.0467764	0.046506	0.959219	0.0147866	0.0453378
0.7523	1.05195	0.604555	1.05899	1.06039	0.0739009	0.177371		0.962755	0.661149	0.953713	0.964989	0.12246	0.0142157		0.957574	0.0467088	0.0466412	0.957086	0.014701	0.0454234
0.7533	1.05211	0.604237	1.05934	1.0598	0.0755895	0.176827		0.962755	0.659587	0.95416	0.965766	0.124014	0.0142158		0.958117	0.0467764	0.0465736	0.956055	0.0149577	0.045509
0.7543	1.05126	0.604819	1.05912	1.05935	0.0750951	0.175888		0.963201	0.660591	0.954942	0.966322	0.126346	0.0138827		0.95866	0.0469793	0.0468441	0.956227	0.0148721	0.0456802
0.7553	1.05137	0.605615	1.05906	1.05881	0.0744774	0.176135		0.963351	0.661595	0.955499	0.966543	0.128566	0.0141047		0.958728	0.0469793	0.0465736	0.955539	0.0149577	0.045509
0.7563	1.05163	0.606622	1.05863	1.05876	0.0750128	0.176234		0.962457	0.662376	0.95416	0.966322	0.131341	0.0142157		0.958593	0.0467764	0.0466412	0.955625	0.014701	0.0457657
0.7573	1.05153	0.607523	1.05856	1.05802	0.0743127	0.175592		0.962308	0.662376	0.953825	0.966432	0.131564	0.0138827		0.958185	0.0465059	0.0463031	0.956828	0.014701	0.0459369
0.7583	1.05126	0.607735	1.05814	1.05812	0.0736538	0.17485		0.963648	0.662042	0.954383	0.965877	0.133784	0.0143268		0.957846	0.0463707	0.0463031	0.957258	0.0147866	0.0455945
0.7593	1.05179	0.606939	1.0587	1.05817	0.0732008	0.174455		0.963796	0.662712	0.954495	0.964768	0.133895	0.0146599		0.958593	0.0466412	0.0463707	0.957508	0.0148721	0.0455945
0.7603	1.05254	0.605826	1.05941	1.05782	0.0736538	0.174455		0.963499	0.661261	0.954942	0.963657	0.134894	0.0149928		0.959809	0.0468441	0.0464383	0.958453	0.0145298	0.0454234
0.7613	1.05248	0.604766	1.05934	1.05787	0.0735302	0.175147		0.963796	0.661038	0.954717	0.963878	0.134672	0.015992		0.958994	0.0469117	0.0465736	0.96068	0.0146154	0.0451666
0.7623	1.0519	0.604448	1.05885	1.05856	0.0734891	0.176234		0.963053	0.661149	0.953043	0.963878	0.13334	0.0143268		0.958389	0.0469793	0.0467764	0.959477	0.0150433	0.0448244
0.7633	1.05185	0.604819	1.05842	1.05945	0.0730773	0.177025		0.961861	0.662601	0.952262	0.963768	0.130786	0.0135496		0.958796	0.0469117	0.0467764	0.956914	0.0148721	0.0449099
0.7643	1.05137	0.605032	1.05828	1.05995	0.0746009	0.177025		0.962606	0.663493	0.952821	0.962991	0.129454	0.0136607		0.960352	0.0471145	0.0467764	0.954773	0.0149577	0.0451666
0.7653	1.05163	0.605085	1.0587	1.0598	0.0745598	0.176481		0.962904	0.663493	0.953155	0.962658	0.128344	0.0139936		0.96008	0.0469117	0.0466412	0.956828	0.0148721	0.0451666
0.7663	1.05248	0.605932	1.05948	1.05985	0.0741068	0.176283		0.962606	0.661931	0.952709	0.963101	0.1279	0.0143268		0.959333	0.0469793	0.0467764	0.958109	0.0150433	0.0449955
0.7673	1.05248	0.606675	1.05969	1.0597	0.073242	0.176481		0.962755	0.659251	0.953266	0.963435	0.127123	0.0136607		0.958457	0.0470469	0.0467088	0.957594	0.0148721	0.0451666
0.7683	1.05227	0.606568	1.05941	1.05935	0.0733244	0.17653		0.963351	0.658582	0.953155	0.963324	0.125236	0.0131055		0.958932	0.0472498	0.0469117	0.958195	0.0147866	0.0450811
0.7693	1.05232	0.607046	1.05969	1.05989	0.0732008	0.176629		0.963351	0.660255	0.953266	0.962658	0.124236	0.0125504		0.959537	0.0472498	0.0471145	0.95982	0.014701	0.0449099
0.7703	1.05222	0.607311	1.05962	1.06024	0.0734891	0.176086		0.962754	0.662376	0.953155	0.961436	0.124236	0.0122174		0.96042	0.0469793	0.046844	0.959906	0.0146154	0.0445676
0.7713	1.05237	0.607682	1.05983	1.05985	0.0731596	0.175986		0.963499	0.66327	0.953602	0.960659	0.128788	0.0119954		0.960685	0.0469117	0.0466412	0.960336	0.0144443	0.0446532
0.7723	1.05285	0.608212	1.06019	1.05999	0.072542	0.176432		0.964391	0.664721	0.953825	0.962435	0.130898	0.0124394		0.961568	0.0467764	0.0464383	0.959055	0.0141875	0.0449955
0.7733	1.0528	0.607735	1.06019	1.06034	0.072789	0.176086		0.963946	0.666507	0.953825	0.964434	0.132341	0.0132166		0.961432	0.0469793	0.0466412	0.957766	0.0143587	0.0454234
0.7743	1.05227	0.606304	1.05955	1.06172	0.0721714	0.176382		0.963946	0.667624	0.954048	0.966099	0.132674	0.0139936		0.960753	0.0465736	0.0464383	0.95768	0.0145298	0.045509
0.7753	1.05254	0.605243	1.05948	1.06192	0.0718831	0.176184		0.964391	0.667958	0.95349	0.966211	0.131009	0.0147708		0.959537	0.0465736	0.0463031	0.956914	0.0144442	0.0453378
0.7763	1.05232	0.605244	1.05948	1.06192	0.0720477	0.175986		0.964243	0.667288	0.952821	0.965432	0.130342	0.0134386		0.959198	0.0467764	0.046506	0.957	0.014701	0.0453378
0.7773	1.0529	0.60625	1.06012	1.06162	0.0729126	0.175641		0.963499	0.666395	0.952932	0.964655	0.131009	0.0123284		0.959198	0.0471145	0.0467764	0.956656	0.0146154	0.0449955
0.7783	1.05338	0.607257	1.06075	1.06177	0.073242	0.174998		0.962755	0.665726	0.953379	0.964212	0.129232	0.0119953		0.959198	0.0472498	0.0469793	0.956656	0.0142731	0.0446532
0.7793	1.05344	0.608848	1.06096	1.06128	0.073695	0.175097		0.963351	0.665279	0.953043	0.964655	0.125902	0.0128835		0.960012	0.0469117	0.0467764	0.956398	0.0146154	0.0447388
0.7803	1.05285	0.609749	1.06054	1.06093	0.0744774	0.176135		0.964094	0.663159	0.953936	0.964434	0.123126	0.0134386		0.960685	0.0468441	0.0468441	0.955711	0.0144442	0.0449099
0.7813	1.05232	0.609802	1.05983	1.0602	0.0739009	0.176283		0.964094	0.659921	0.95416	0.964434	0.127123	0.0135496		0.960753	0.0469793	0.0466412	0.954688	0.0145298	0.0448244
0.7823	1.05227	0.608954	1.05969	1.05965	0.0741068	0.175492		0.964094	0.660591	0.95416	0.963546	0.131342	0.0135496		0.961228	0.0470469	0.0467764	0.95443	0.0150433	0.0448244
0.7833	1.05227	0.608212	1.0599	1.05905	0.0751775	0.175443		0.964541	0.661595	0.954717	0.964655	0.133118	0.0138827		0.961772	0.0471145	0.0467764	0.953578	0.0146154	0.0448244
0.7843	1.05206	0.608159	1.0599	1.05891	0.0754248	0.175789		0.965136	0.662712	0.954495	0.965432	0.131897	0.0144378		0.960685	0.0471145	0.0469793	0.951859	0.0149577	0.0448244
0.7853	1.05222	0.607735	1.05976	1.05895	0.0762895	0.175542		0.964988	0.663046	0.954829	0.965766	0.131786	0.0149928		0.959333	0.0471821	0.0471821	0.953742	0.0147866	0.0448244
0.7863	1.05243	0.607257	1.05997	1.05905	0.0763714	0.175542		0.965136	0.663382	0.955053	0.964655	0.132785	0.0146599		0.958728	0.0473173	0.0470469	0.95657	0.0150433	0.0447388
0.7873	1.05254	0.606993	1.05997	1.05926	0.0758361	0.175246		0.963946	0.662489	0.95483	0.963546	0.133451	0.0143268		0.959198	0.0470469	0.0467764	0.957086	0.0148721	0.0448244
0.7883	1.05201	0.607205	1.05926	1.0592	0.0751774	0.174257		0.961564	0.662601	0.952596	0.961992	0.132563	0.0138827		0.960352	0.046844	0.0465736	0.955969	0.014701	0.0446532
0.7893	1.05169	0.607575	1.05899	1.05905	0.0753421	0.173565		0.960522	0.662489	0.951592	0.960881	0.132341	0.0139936		0.961296	0.046844	0.0466412	0.954344	0.014701	0.0450811
0.7903	1.05185	0.607946	1.05983	1.05891	0.0762481	0.173516		0.961118	0.662042	0.951481	0.961103	0.128011	0.0136607		0.962309	0.0467088	0.046506	0.953656	0.0149577	0.0449099
0.7913	1.05195	0.608106	1.06005	1.05886	0.0770714	0.173961		0.961564	0.661149	0.952262	0.962103	0.12468	0.0133276		0.962105	0.0465736	0.0463031	0.954773	0.0147866	0.0453378
0.7923	1.05232	0.608212	1.0599	1.05851	0.0771128	0.174899		0.962011	0.660144	0.952262	0.962103	0.122682	0.0126615		0.961296	0.0465736	0.0463707	0.954602	0.0144442	0.0452523
0.7933	1.05237	0.608424	1.05983	1.05782	0.0749304	0.17574		0.963351	0.660702	0.953379	0.963324	0.122127	0.0137716		0.96116	0.0467088	0.0465736	0.955117	0.014701	0.0454234
0.7943	1.0528	0.607682	1.0604	1.05747	0.0743538	0.176036		0.963351	0.664163	0.953602	0.963435	0.125013	0.0128835		0.961364	0.0469793	0.0467764	0.955625	0.0148721	0.0451666
0.7953	1.05306	0.607099	1.06054	1.05792	0.0742303	0.176629		0.963053	0.666173	0.953155	0.964434	0.127678	0.0123284		0.960549	0.0471145	0.0469793	0.954688	0.0148721	0.0450811
0.7963	1.05323	0.606781	1.05997	1.05955	0.0739009	0.176481		0.961416	0.665837	0.952039	0.9651	0.130009	0.0121063		0.960753	0.0471145	0.0469793	0.954516	0.0149577	0.0452523
0.7973	1.05248	0.606515	1.05912	1.06014	0.074395	0.176283		0.960821	0.665167	0.951481	0.964768	0.131009	0.0126614		0.960216	0.0471821	0.0469117	0.955289	0.0149577	0.0449955
0.7983	1.05206	0.607046	1.05849	1.05999	0.0747245	0.177025		0.960522	0.665056	0.951592	0.964545	0.13223	0.0125505		0.960148	0.0471145	0.0470469	0.956398	0.0147866	0.0452523
0.7993	1.05206	0.608053	1.05849	1.05985	0.0750128	0.177321		0.961266	0.664944	0.952151	0.963324	0.133118	0.0132165		0.960012	0.0471145	0.0469117	0.95768	0.0145298	0.0449099
0.8003	1.05264	0.608954	1.05926	1.05916	0.0753008	0.177321		0.961118	0.663493	0.952151	0.96288	0.134894	0.0137716		0.959809	0.0471145	0.0469117	0.958453	0.0144442	0.0449955
0.8013	1.05285	0.608635	1.05983	1.05886	0.0753835	0.176728		0.961713	0.662265	0.952262	0.962991	0.137892	0.0134386		0.959537	0.0470469	0.0467764	0.958969	0.0147866	0.0452523
0.8023	1.05338	0.607946	1.06047	1.0592	0.0747656	0.175888		0.963201	0.660257	0.953043	0.962991	0.139446	0.0124394		0.959198	0.0469117	0.0465736	0.959562	0.0153856	0.0450811
0.8033	1.0537	0.60747	1.06096	1.0592	0.074148	0.17574		0.963796	0.65981	0.953266	0.963546	0.138891	0.0126615		0.959877	0.0469793	0.0466412	0.959992	0.0155568	0.0447388
0.8043	1.05333	0.607575	1.06061	1.05881	0.0729538	0.176234		0.963053	0.662265	0.952596	0.963991	0.136559	0.0123285		0.959809	0.0469117	0.0467088	0.958539	0.0154712	0.0448244
0.8053	1.05291	0.607311	1.06012	1.05871	0.0734479	0.176184		0.961861	0.664163	0.951592	0.964545	0.134894	0.0123284		0.960216	0.0468441	0.0465736	0.958109	0.0152145	0.044482
0.8063	1.05264	0.607046	1.05948	1.05847	0.0739833	0.176184		0.962159	0.664944	0.952374	0.963991	0.133784	0.0126615		0.960889	0.0470469	0.0465736	0.958453	0.0151289	0.0447388
0.8073	1.05264	0.606357	1.05955	1.05836	0.0746009	0.175938		0.962308	0.664274	0.952596	0.964878	0.130343	0.0136607		0.961704	0.0467764	0.046506	0.958367	0.0148721	0.0450811
0.8083	1.05296	0.605986	1.06012	1.05836	0.074848	0.175295		0.962606	0.663382	0.95349	0.965322	0.127456	0.0143268		0.962037	0.0467764	0.0466412	0.959391	0.0146154	0.0449099
0.8093	1.05317	0.605826	1.06026	1.05812	0.0750539	0.175344		0.961416	0.663046	0.952374	0.964989	0.126901	0.015548		0.962852	0.0467088	0.0465736	0.959562	0.0145298	0.0451666
0.8103	1.05349	0.606092	1.06082	1.05792	0.0753008	0.176036		0.960821	0.662154	0.95137	0.964323	0.133007	0.0158811		0.962309	0.0469117	0.046844	0.958711	0.0144443	0.0449099
0.8113	1.05365	0.605721	1.06075	1.05822	0.0753835	0.175986		0.962457	0.661707	0.952262	0.963546	0.137558	0.0154369		0.9615	0.0469793	0.0469117	0.958023	0.0142731	0.0453378
0.8123	1.0527	0.605774	1.06033	1.05836	0.0766188	0.174998		0.964094	0.662489	0.953379	0.963657	0.136004	0.0151039		0.962241	0.0469793	0.0467764	0.958625	0.0141875	0.0450811
0.8133	1.05222	0.606993	1.05962	1.05851	0.0778541	0.173813		0.964541	0.662601	0.95349	0.963212	0.135005	0.0147708		0.963593	0.0470469	0.0466412	0.958883	0.0141875	0.0449099
0.8143	1.05201	0.607841	1.05955	1.05826	0.0779368	0.173615		0.963946	0.660255	0.952932	0.963878	0.132785	0.0148819		0.964136	0.0468441	0.0466412	0.957852	0.0146154	0.0449955
0.8153	1.05201	0.608635	1.05962	1.05772	0.0776481	0.174356		0.963201	0.659029	0.953155	0.962991	0.131231	0.0151039		0.963056	0.0469117	0.0468441	0.956742	0.0149577	0.0449955
0.8163	1.05254	0.609484	1.06026	1.05787	0.0769895	0.17569		0.963946	0.658582	0.953602	0.962546	0.128011	0.0148819		0.962648	0.0467088	0.0465736	0.956141	0.0146154	0.0449955
0.8173	1.05275	0.610438	1.06047	1.05792	0.0768248	0.177025		0.963351	0.661819	0.95349	0.962435	0.128233	0.0135496		0.961636	0.046844	0.0464383	0.955453	0.0148721	0.0452523
0.8183	1.05296	0.610862	1.06047	1.05817	0.0760835	0.177074		0.963946	0.664052	0.954272	0.963212	0.128788	0.0131055		0.960821	0.0467764	0.0466412	0.955031	0.0150433	0.0448244
0.8193	1.05254	0.609908	1.05955	1.05832	0.0759602	0.17653		0.963499	0.664052	0.953936	0.964101	0.127678	0.0127725		0.96008	0.0470469	0.0466412	0.955969	0.0147866	0.0451666
0.8203	1.05243	0.608742	1.05969	1.05817	0.0750539	0.176184		0.962755	0.663493	0.953266	0.963878	0.125791	0.0129945		0.959469	0.0469793	0.0466412	0.957422	0.0144443	0.0455945
0.8213	1.05338	0.606939	1.06054	1.05807	0.074148	0.175789		0.961861	0.662823	0.952374	0.963212	0.125791	0.0129945		0.959877	0.0469793	0.0466412	0.95768	0.014701	0.045509
0.8223	1.05359	0.606092	1.06047	1.05817	0.074148	0.176135		0.960969	0.661372	0.952262	0.963657	0.126568	0.0128835		0.960753	0.0467088	0.0466412	0.958109	0.0145298	0.0451666
0.8233	1.05359	0.605562	1.06068	1.05841	0.0737362	0.176432		0.960076	0.659251	0.951258	0.964323	0.127456	0.0123284		0.961296	0.0465736	0.046506	0.956828	0.0146154	0.0449099
0.8243	1.05349	0.605721	1.06054	1.05871	0.0738597	0.17653		0.959927	0.661038	0.95137	0.962769	0.129898	0.0123284		0.962105	0.0466412	0.0463707	0.955969	0.0142731	0.0448244
0.8253	1.05344	0.606092	1.06047	1.05876	0.0739833	0.175986		0.961266	0.663605	0.952821	0.961326	0.129787	0.0131055		0.962512	0.0467088	0.0465736	0.955969	0.0141875	0.0449955
0.8263	1.05323	0.606039	1.06019	1.05876	0.0731184	0.176234		0.962011	0.664163	0.95349	0.960549	0.130342	0.0137716		0.963123	0.0467088	0.0463031	0.95657	0.0146154	0.0450811
0.8273	1.05312	0.605455	1.0599	1.05895	0.073242	0.176481		0.961713	0.664386	0.952485	0.961104	0.128455	0.0151039		0.96292	0.046506	0.0463031	0.957594	0.0145298	0.0452523
0.8283	1.05296	0.605244	1.05969	1.05935	0.0736126	0.176481		0.961713	0.665614	0.951928	0.961769	0.125347	0.015548		0.962988	0.0465736	0.0465736	0.958109	0.0141875	0.0452523
0.8293	1.05338	0.604979	1.06033	1.05965	0.0731184	0.176184		0.961266	0.664944	0.952039	0.961881	0.12468	0.0152149		0.962512	0.0468441	0.0467088	0.956398	0.0146154	0.0452523
0.8303	1.05344	0.604025	1.06068	1.0596	0.0727066	0.176036		0.962606	0.665279	0.952596	0.961881	0.129565	0.0147708		0.961568	0.0469793	0.0467088	0.955539	0.0150433	0.045509
0.8313	1.05243	0.603283	1.06005	1.05905	0.0708535	0.176184		0.962159	0.664721	0.952932	0.961992	0.135782	0.0141047		0.960481	0.046844	0.0467764	0.956656	0.0148721	0.0453378
0.8323	1.05201	0.603283	1.05948	1.05861	0.0711418	0.175838		0.959927	0.662265	0.951592	0.962991	0.139003	0.0134386		0.959741	0.0469793	0.0469117	0.957937	0.0149577	0.0454234
0.8333	1.05174	0.603654	1.05926	1.05817	0.0729126	0.176432		0.959332	0.661038	0.950923	0.96288	0.137226	0.0135496		0.958593	0.0469793	0.0467088	0.959477	0.0148721	0.0454234
0.8343	1.05163	0.604661	1.05905	1.05797	0.0733244	0.176728		0.959034	0.66048	0.950477	0.963657	0.133784	0.0142158		0.958049	0.0468441	0.0465736	0.959055	0.0145298	0.0451666
0.8353	1.05174	0.605455	1.05877	1.05861	0.0730773	0.176728		0.960671	0.661038	0.951592	0.962546	0.13112	0.0141047		0.959198	0.0466412	0.0467088	0.958711	0.014701	0.0449099
0.8363	1.05237	0.606197	1.05905	1.0594	0.0736538	0.176135		0.961118	0.662376	0.951704	0.961769	0.129676	0.0137716		0.960889	0.0471145	0.0468441	0.959391	0.0149577	0.0452523
0.8373	1.0528	0.607417	1.05976	1.05974	0.0747657	0.175888		0.961416	0.663605	0.952039	0.962435	0.13012	0.0147709		0.962105	0.0473173	0.0469793	0.959219	0.0150433	0.045509
0.8383	1.05285	0.607628	1.06012	1.0602	0.0745598	0.176234		0.961564	0.662823	0.953043	0.963101	0.12679	0.0148819		0.963191	0.047385	0.0474526	0.958281	0.0149577	0.0453378
0.8393	1.05317	0.606515	1.06047	1.06024	0.0744774	0.176135		0.961564	0.663493	0.953043	0.962658	0.122682	0.0146599		0.963932	0.047385	0.0472498	0.958453	0.014701	0.0451666
0.8403	1.05291	0.605879	1.06005	1.06068	0.0737774	0.175196		0.960076	0.664052	0.952151	0.961881	0.123126	0.0153259		0.964747	0.047385	0.0471821	0.95982	0.0143587	0.0450811
0.8413	1.0528	0.605508	1.05969	1.06068	0.0729126	0.175048		0.959927	0.662376	0.951258	0.961881	0.123792	0.0149928		0.964407	0.0473173	0.0471145	0.961102	0.0141875	0.0449955
0.8423	1.05344	0.605244	1.06054	1.06044	0.0715124	0.174553		0.960522	0.661484	0.951034	0.960549	0.126457	0.0141047		0.96366	0.0474526	0.0472498	0.960078	0.0142731	0.0454234
0.8433	1.05412	0.60535	1.0621	1.05974	0.0707712	0.173862		0.961266	0.662489	0.95137	0.96077	0.127456	0.0135496		0.964272	0.047385	0.0471821	0.958453	0.0144443	0.0453378
0.8443	1.05481	0.605244	1.06308	1.05812	0.0721302	0.173368		0.961266	0.662712	0.951704	0.962324	0.128455	0.0128835		0.964815	0.0473173	0.0471821	0.956484	0.0144442	0.0455945
0.8453	1.0546	0.605137	1.06287	1.05812	0.0732832	0.174653		0.961564	0.661931	0.951481	0.96288	0.130675	0.0127725		0.964543	0.047385	0.0471822	0.956484	0.0149577	0.0453378
0.8463	1.05381	0.605137	1.06174	1.05807	0.0742715	0.176036		0.961266	0.661261	0.951034	0.963101	0.13112	0.0135496		0.964679	0.047385	0.0471145	0.957766	0.0148721	0.0450811
0.8473	1.05275	0.604714	1.06061	1.05871	0.074395	0.177123		0.960821	0.659251	0.950477	0.96288	0.129787	0.0136607		0.964	0.0470469	0.0469793	0.95768	0.0150433	0.045509
0.8483	1.05237	0.604183	1.06026	1.05881	0.0745186	0.178062		0.960224	0.658582	0.950141	0.961992	0.127456	0.0138827		0.964272	0.0469117	0.0469793	0.957508	0.0144443	0.0449955
0.8493	1.05259	0.60323	1.06005	1.05891	0.0746421	0.178902		0.961416	0.659251	0.950923	0.961992	0.127456	0.0145488		0.963728	0.0471821	0.0468441	0.957766	0.0144442	0.0452523
0.8503	1.05264	0.602488	1.06026	1.05995	0.0743127	0.17915		0.961713	0.660144	0.95137	0.961658	0.12901	0.0149928		0.962309	0.0470469	0.046844	0.956656	0.0148721	0.0456802
0.8513	1.05296	0.60323	1.06054	1.05995	0.0727067	0.179002		0.961118	0.659921	0.951145	0.961658	0.129676	0.0153259		0.962105	0.0471145	0.0469117	0.956141	0.0149577	0.0459369
0.8523	1.05317	0.603972	1.06096	1.06039	0.0709771	0.177617		0.960374	0.661149	0.9507	0.962547	0.132008	0.0146599		0.962512	0.0471145	0.0472498	0.956141	0.014701	0.0456802
0.8533	1.0527	0.604661	1.06047	1.05999	0.0706888	0.17653		0.959927	0.661149	0.950923	0.964212	0.132674	0.0142158		0.962444	0.0471821	0.0469117	0.957852	0.0146154	0.045509
0.8543	1.05259	0.605137	1.06012	1.05974	0.0719242	0.175394		0.960374	0.659587	0.950811	0.963657	0.133007	0.0138827		0.961568	0.0473173	0.0471821	0.958969	0.0146154	0.0454234
0.8553	1.05237	0.605826	1.06005	1.06009	0.0720478	0.175048		0.959779	0.65914	0.950253	0.962547	0.131453	0.0126614		0.961296	0.0471145	0.0471821	0.960336	0.0146154	0.045509
0.8563	1.05259	0.605774	1.06047	1.0597	0.0729538	0.174603		0.960522	0.65847	0.95003	0.962769	0.129565	0.0127725		0.9615	0.0470469	0.0468441	0.960164	0.0145298	0.0454234
0.8573	1.0527	0.605085	1.06068	1.0595	0.0737774	0.174356		0.960374	0.658582	0.949807	0.962435	0.1279	0.0135496		0.961907	0.0469117	0.0467088	0.959141	0.0144443	0.0455945
0.8583	1.05254	0.604555	1.06012	1.05999	0.0740656	0.175542		0.959927	0.65847	0.949694	0.963324	0.125458	0.0147708		0.961969	0.0467764	0.0466412	0.959734	0.0144442	0.045509
0.8593	1.05227	0.604448	1.05948	1.0602	0.0741068	0.176728		0.960224	0.65981	0.950141	0.963435	0.122682	0.0153259		0.96184	0.0467088	0.0465736	0.959906	0.0148721	0.0455945
0.8603	1.05174	0.603654	1.05919	1.06024	0.0744774	0.178062		0.960374	0.660702	0.950141	0.963101	0.122016	0.0145488		0.961907	0.0469793	0.0466412	0.959992	0.0147866	0.0457657
0.8613	1.05169	0.60307	1.05892	1.06034	0.0747245	0.177469		0.960076	0.659698	0.950253	0.96288	0.120018	0.0136607		0.962241	0.0469117	0.0467764	0.959648	0.0146154	0.0456802
0.8623	1.05206	0.603759	1.05885	1.06098	0.0750539	0.176876		0.960819	0.658247	0.950477	0.962103	0.121683	0.0133276		0.96292	0.0467088	0.0465736	0.959305	0.0147866	0.0452523
0.8633	1.05232	0.604766	1.05969	1.06074	0.0755068	0.17742		0.960374	0.658247	0.9507	0.96077	0.125013	0.0147708		0.964272	0.0466412	0.0463031	0.959648	0.0147866	0.0453378
0.8643	1.05301	0.605561	1.06019	1.06039	0.0757541	0.177222		0.959332	0.660368	0.95003	0.960549	0.127567	0.0152149		0.964543	0.0468441	0.0465736	0.96025	0.0146154	0.0452523
0.8653	1.05317	0.605826	1.06068	1.05974	0.0756308	0.176975		0.959779	0.662042	0.950477	0.961215	0.128899	0.0158811		0.964611	0.0467088	0.0466412	0.959562	0.014701	0.0449099
0.8663	1.05301	0.605668	1.0604	1.05836	0.0752188	0.176777		0.960671	0.663046	0.95137	0.961326	0.130009	0.0153259		0.964815	0.0469117	0.0465736	0.958539	0.0147866	0.0449955
0.8673	1.05285	0.605774	1.0599	1.05812	0.0750127	0.17653		0.960522	0.665279	0.952039	0.962103	0.131786	0.0152149		0.964543	0.0467088	0.0466412	0.959391	0.014701	0.0450811
0.8683	1.05349	0.606039	1.06061	1.05881	0.0744774	0.176629		0.960671	0.666395	0.951704	0.962547	0.131453	0.0145488		0.964815	0.0467764	0.0465736	0.961703	0.0146154	0.0448244
0.8693	1.05397	0.606304	1.06089	1.05911	0.0749304	0.17658		0.960224	0.666173	0.950477	0.961769	0.129787	0.0136607		0.964272	0.0466412	0.0463707	0.960938	0.0148721	0.0449955
0.8703	1.05354	0.606568	1.0604	1.05916	0.0754654	0.176481		0.959629	0.665056	0.949918	0.961769	0.131897	0.0138827		0.96366	0.0467088	0.046506	0.960336	0.0149577	0.0448244
0.8713	1.05344	0.60641	1.06026	1.05945	0.0758774	0.175938		0.959927	0.664274	0.950141	0.962214	0.133784	0.0137716		0.963056	0.0469793	0.0467088	0.96025	0.014701	0.0449099
0.8723	1.05381	0.605879	1.0604	1.05886	0.0755895	0.175443		0.958736	0.663605	0.95003	0.962103	0.132452	0.0148819		0.963395	0.0471145	0.0470469	0.960508	0.0144442	0.0447388
0.8733	1.05381	0.605615	1.06047	1.05916	0.0754654	0.174059		0.958736	0.663716	0.949807	0.961658	0.131564	0.0149928		0.962988	0.0474526	0.0471821	0.959992	0.0142731	0.0445677
0.8743	1.05375	0.605986	1.0604	1.05905	0.0746421	0.172923		0.958587	0.66327	0.949807	0.961215	0.130342	0.0152149		0.961296	0.0471821	0.0471145	0.959141	0.0141875	0.0447388
0.8753	1.05333	0.605561	1.06012	1.05926	0.0741068	0.172923		0.959183	0.662823	0.949807	0.96077	0.128566	0.015437		0.960753	0.0471821	0.0472498	0.958969	0.014102	0.0443965
0.8763	1.05328	0.605455	1.06068	1.05985	0.0745598	0.172874		0.959927	0.661931	0.950364	0.960881	0.127789	0.0149928		0.960957	0.0472498	0.0470469	0.958539	0.0140163	0.0446532
0.8773	1.05354	0.60519	1.06125	1.0597	0.073695	0.174159		0.958885	0.660368	0.949471	0.961658	0.127234	0.0152149		0.961025	0.0471821	0.0469117	0.958539	0.0143587	0.0449099
0.8783	1.05381	0.605879	1.06117	1.05916	0.0735302	0.175295		0.959183	0.661038	0.948467	0.962547	0.126124	0.0146599		0.961772	0.0471145	0.0469117	0.958195	0.014701	0.0446532
0.8793	1.0537	0.606834	1.06103	1.05886	0.0726655	0.176432		0.959183	0.661708	0.947909	0.963212	0.125902	0.0139936		0.962648	0.0469117	0.0466412	0.959219	0.0149577	0.0449099
0.8803	1.05248	0.607788	1.06033	1.05866	0.0726655	0.176876		0.958885	0.661149	0.948467	0.96288	0.129787	0.0134386		0.963457	0.0470469	0.0468441	0.960766	0.0148721	0.0451666
0.8813	1.05243	0.608212	1.0599	1.05856	0.0734891	0.176679		0.959927	0.660368	0.949694	0.962214	0.132341	0.0134386		0.963457	0.0469793	0.0468441	0.960594	0.014701	0.0453378
0.8823	1.05291	0.607099	1.06005	1.0592	0.0741068	0.176629		0.960819	0.661708	0.950811	0.961326	0.131897	0.0139936		0.96434	0.046844	0.0467088	0.960422	0.0151289	0.0453378
0.8833	1.05333	0.606622	1.0604	1.0594	0.0748481	0.177123		0.961861	0.664052	0.951704	0.960992	0.13112	0.0141047		0.963525	0.0471145	0.0469117	0.960422	0.0152145	0.0452523
0.8843	1.05392	0.606251	1.06096	1.05916	0.0767008	0.177123		0.961861	0.664721	0.951928	0.961992	0.130231	0.0136607		0.962105	0.0469117	0.0466412	0.961187	0.0152145	0.0451666
0.8853	1.05412	0.605933	1.06139	1.05881	0.0778128	0.177568		0.960819	0.664833	0.951034	0.962547	0.129121	0.0133276		0.961568	0.0469117	0.0468441	0.961961	0.0150433	0.0450811
0.8863	1.0545	0.605774	1.06223	1.05832	0.0790075	0.177371		0.958885	0.663716	0.949471	0.961769	0.129454	0.0139936		0.960821	0.0471145	0.0467764	0.962305	0.0153856	0.0451666
0.8873	1.0546	0.605615	1.06266	1.05856	0.0792128	0.176086		0.957546	0.663046	0.94869	0.960659	0.1279	0.0146599		0.96116	0.0469793	0.0469793	0.96307	0.0151289	0.0449955
0.8883	1.05412	0.60535	1.06216	1.05876	0.0790895	0.174801		0.958289	0.662712	0.949471	0.959438	0.129454	0.015215		0.962716	0.0468441	0.0467088	0.963672	0.0148721	0.0449099
0.8893	1.05349	0.605721	1.06132	1.0592	0.0781835	0.174356		0.958736	0.661038	0.949807	0.959882	0.130786	0.0149928		0.962648	0.0469793	0.0467088	0.964102	0.0148721	0.0452523
0.8903	1.05306	0.605986	1.06075	1.05905	0.0782248	0.175196		0.959034	0.660255	0.950364	0.960438	0.127789	0.0144378		0.962309	0.0471822	0.0468441	0.963242	0.0147866	0.045509
0.8913	1.05259	0.605137	1.05969	1.0592	0.0764541	0.175986		0.959183	0.66048	0.950364	0.961103	0.122016	0.0135496		0.963191	0.0471821	0.0470469	0.962219	0.0147866	0.0452523
0.8923	1.0519	0.604555	1.05899	1.0598	0.0735303	0.176184		0.959183	0.660814	0.9507	0.961103	0.118352	0.0138827		0.963728	0.0472498	0.0471821	0.960164	0.0149577	0.0454234
0.8933	1.05137	0.604555	1.05849	1.0598	0.0727066	0.17658		0.959332	0.661819	0.951481	0.961104	0.120351	0.0137716		0.963593	0.0473173	0.0471145	0.957766	0.0148722	0.045509
0.8943	1.05089	0.604819	1.05778	1.05974	0.0736538	0.176382		0.958885	0.660702	0.951258	0.960659	0.123126	0.0152149		0.963191	0.0474526	0.0473173	0.955711	0.014701	0.0456802
0.8953	1.051	0.605721	1.05828	1.05945	0.0756308	0.176283		0.959183	0.66048	0.950923	0.959772	0.125902	0.0154369		0.963327	0.0471821	0.0470469	0.954172	0.0147866	0.0449955
0.8963	1.05158	0.606304	1.05941	1.05905	0.0759602	0.176086		0.959034	0.661372	0.949918	0.959993	0.128677	0.0156591		0.963395	0.047385	0.0469117	0.952547	0.0148721	0.0451666
0.8973	1.05264	0.60641	1.06061	1.0592	0.0751774	0.176086		0.959183	0.662823	0.950141	0.959661	0.130786	0.0156591		0.963056	0.0467764	0.0466412	0.95443	0.0149577	0.0450811
0.8983	1.05349	0.606781	1.06089	1.0597	0.074848	0.175789		0.958439	0.662154	0.949249	0.959327	0.132563	0.015548		0.962241	0.0468441	0.0466412	0.956055	0.0145298	0.0451666
0.8993	1.05365	0.607841	1.06068	1.05999	0.0737362	0.175641		0.959034	0.660144	0.949137	0.959105	0.134672	0.0147708		0.961432	0.0467764	0.0465736	0.959219	0.0141875	0.0453378
0.9003	1.05354	0.608265	1.06068	1.06024	0.0740656	0.176234		0.958289	0.657577	0.94869	0.960326	0.135782	0.0149928		0.962173	0.0467088	0.0465736	0.962219	0.0140163	0.0449955
0.9013	1.05328	0.608053	1.06012	1.06029	0.0750539	0.177222		0.957099	0.656908	0.947686	0.960659	0.132896	0.0143268		0.963056	0.0470469	0.0469117	0.963328	0.014102	0.0451666
0.9023	1.05227	0.608317	1.05919	1.06059	0.0757128	0.177815		0.957099	0.656572	0.947462	0.960659	0.130676	0.0145488		0.964475	0.0471145	0.0467764	0.964016	0.0144442	0.0449955
0.9033	1.05222	0.607946	1.05926	1.06098	0.0755481	0.178013		0.957099	0.656796	0.947575	0.959882	0.13112	0.0144378		0.964611	0.0469793	0.0467088	0.963156	0.0140163	0.0448244
0.9043	1.05275	0.607788	1.05983	1.06029	0.0757128	0.177469		0.957249	0.655345	0.947909	0.960215	0.131453	0.0151039		0.964204	0.0469793	0.0467088	0.961102	0.0142731	0.0445677
0.9053	1.05312	0.606568	1.0604	1.06005	0.0758361	0.176827		0.957844	0.654228	0.948356	0.959438	0.132452	0.0147708		0.963728	0.0469793	0.0467764	0.961617	0.0142731	0.0449955
0.9063	1.05259	0.60641	1.05969	1.06093	0.075095	0.176975		0.958885	0.654117	0.949137	0.958772	0.133451	0.015215		0.96258	0.046844	0.0467088	0.962305	0.0145298	0.0451666
0.9073	1.05195	0.606145	1.05941	1.06114	0.0745598	0.176629		0.960076	0.655345	0.950141	0.958772	0.133895	0.0146599		0.961969	0.0467764	0.0467088	0.961359	0.0147866	0.0452523
0.9083	1.05206	0.60519	1.05934	1.06059	0.073695	0.175542		0.960224	0.656126	0.950477	0.958328	0.13445	0.0141047		0.961228	0.0469793	0.0466412	0.960164	0.0148721	0.0453378
0.9093	1.05254	0.604979	1.06019	1.05945	0.073942	0.174257		0.959332	0.656908	0.949918	0.958328	0.135782	0.0143268		0.961025	0.0471145	0.0469117	0.960594	0.0147866	0.0449099
0.9103	1.05312	0.605032	1.06061	1.05807	0.0744362	0.174159		0.958141	0.658359	0.949471	0.957995	0.135561	0.0152149		0.962105	0.0471145	0.0467088	0.96025	0.0150433	0.0447388
0.9113	1.05365	0.605244	1.06132	1.05728	0.073942	0.174603		0.959034	0.658693	0.949694	0.958105	0.132674	0.0151039		0.962784	0.0469793	0.0466412	0.95982	0.0150433	0.0449955
0.9123	1.05412	0.60535	1.06195	1.05743	0.0726244	0.17485		0.958885	0.660033	0.949807	0.957884	0.13012	0.0145488		0.964068	0.0468441	0.0467088	0.959734	0.0149577	0.0449955
0.9133	1.05333	0.606092	1.06181	1.05866	0.0713065	0.175147		0.958885	0.659251	0.950141	0.958439	0.129454	0.0138827		0.964877	0.0469117	0.0465736	0.959562	0.0149577	0.0450811
0.9143	1.05296	0.606728	1.06117	1.0597	0.0721301	0.175789		0.958439	0.659363	0.949471	0.957328	0.131119	0.0127725		0.964	0.0469117	0.0467088	0.958625	0.0152145	0.0450811
0.9153	1.0527	0.607257	1.06075	1.05945	0.0730361	0.176975		0.958587	0.65981	0.949137	0.958216	0.132341	0.0119953		0.962648	0.0467764	0.0466412	0.958281	0.0153856	0.0448244
0.9163	1.05227	0.607894	1.05983	1.05905	0.073695	0.177074		0.959183	0.659587	0.949249	0.960104	0.131564	0.0129945		0.96258	0.0467764	0.0466412	0.957852	0.0153856	0.0449099
0.9173	1.05264	0.608159	1.05983	1.05861	0.0737774	0.176481		0.958141	0.659587	0.94936	0.961436	0.130898	0.0144377		0.963327	0.046844	0.0465736	0.957852	0.0150433	0.0447388
0.9183	1.05328	0.608106	1.0604	1.05836	0.0734891	0.175492		0.957694	0.659921	0.948356	0.961215	0.130342	0.015992		0.962309	0.0470469	0.0468441	0.95768	0.0150433	0.044482
0.9193	1.05301	0.608477	1.06054	1.05847	0.0742714	0.175789		0.958141	0.658917	0.948132	0.959882	0.131231	0.0161031		0.961568	0.0469117	0.0467764	0.960422	0.0152145	0.0443109
0.9203	1.05344	0.607523	1.06075	1.05916	0.0753421	0.17574		0.958141	0.65713	0.948579	0.960215	0.133895	0.0152149		0.961772	0.0468441	0.046506	0.961875	0.0150433	0.044482
0.9213	1.05397	0.605668	1.06089	1.05871	0.0772774	0.174751		0.958736	0.657353	0.949583	0.960438	0.134117	0.0151039		0.962105	0.0467088	0.0465736	0.961359	0.0145298	0.0445677
0.9223	1.05407	0.604926	1.06132	1.05901	0.0776068	0.175097		0.959332	0.660033	0.950253	0.959661	0.133451	0.0147708		0.961704	0.0467088	0.046506	0.960422	0.0146154	0.0446532
0.9233	1.05344	0.605244	1.0611	1.05916	0.0761662	0.176135		0.959183	0.661931	0.950588	0.958105	0.13334	0.0135496		0.961704	0.0469117	0.0467088	0.95768	0.014701	0.0447388
0.9243	1.05317	0.605455	1.06075	1.05847	0.0751775	0.176728		0.959034	0.66327	0.9507	0.957328	0.133007	0.0138827		0.963259	0.0469117	0.046844	0.955117	0.0146154	0.0449955
0.9253	1.05312	0.60535	1.06068	1.05797	0.074601	0.177371		0.959183	0.662712	0.951145	0.957773	0.132452	0.0145488		0.96508	0.0469117	0.0468441	0.955031	0.0142731	0.0449099
0.9263	1.05317	0.605774	1.06026	1.05747	0.0735302	0.177222		0.959034	0.661931	0.950811	0.959105	0.130898	0.0149928		0.965827	0.046844	0.0466412	0.955453	0.0145298	0.0451666
0.9273	1.05402	0.60535	1.06096	1.05713	0.0720066	0.177865		0.958141	0.661819	0.949807	0.959438	0.132008	0.0148819		0.966235	0.0471145	0.0469117	0.957	0.0146154	0.0454234
0.9283	1.05386	0.605615	1.06096	1.05757	0.0716771	0.177371		0.957546	0.662601	0.949026	0.960104	0.132452	0.0147708		0.966099	0.0469117	0.0468441	0.957766	0.014701	0.0455945
0.9293	1.05344	0.606197	1.06033	1.05822	0.072789	0.177371		0.957099	0.662154	0.948243	0.960215	0.13012	0.0142157		0.965623	0.0467764	0.0465736	0.958711	0.0148721	0.0453378
0.9303	1.05333	0.607364	1.06026	1.05881	0.074148	0.177371		0.957249	0.65981	0.948243	0.959327	0.130342	0.0136607		0.964877	0.0469793	0.0466412	0.959648	0.0146154	0.0450811
0.9313	1.05354	0.608371	1.06026	1.0593	0.0746833	0.177025		0.957397	0.658247	0.948243	0.959882	0.133451	0.0141047		0.963525	0.0469117	0.0467088	0.960508	0.0149577	0.0447388
0.9323	1.05275	0.608635	1.05955	1.0592	0.0741068	0.176827		0.957397	0.658359	0.947351	0.958105	0.137004	0.0133276		0.962512	0.0467764	0.0466412	0.961102	0.0147866	0.0449955
0.9333	1.05206	0.608317	1.05919	1.05955	0.0738597	0.176086		0.956951	0.658804	0.946905	0.957662	0.136781	0.0136607		0.961772	0.0469793	0.0468441	0.961187	0.0148721	0.0451666
0.9343	1.05206	0.607417	1.05941	1.05999	0.0739421	0.175986		0.956355	0.658804	0.946011	0.958439	0.136559	0.0138827		0.962241	0.0467764	0.0465736	0.958625	0.0147866	0.0448244
0.9353	1.05317	0.607099	1.06082	1.0598	0.0747244	0.175789		0.956355	0.657577	0.946011	0.959882	0.13445	0.0139936		0.963327	0.0468441	0.0467088	0.955453	0.0152145	0.0445677
0.9363	1.05349	0.607523	1.06167	1.0594	0.0761662	0.175838		0.955462	0.658023	0.945565	0.961547	0.132896	0.0146599		0.963327	0.0469793	0.0467764	0.954773	0.0153856	0.0445677
0.9373	1.05375	0.607364	1.06146	1.05974	0.0757955	0.17658		0.95442	0.657355	0.944337	0.961436	0.130231	0.0163251		0.963123	0.0469793	0.0469117	0.955203	0.0149577	0.0450811
0.9383	1.05349	0.607364	1.06047	1.06005	0.0757541	0.176481		0.953974	0.655791	0.944337	0.960659	0.127234	0.0164361		0.962784	0.0470469	0.0469117	0.955539	0.0148721	0.0453378
0.9393	1.05349	0.607523	1.06026	1.0597	0.0748892	0.175938		0.954272	0.65501	0.945007	0.959993	0.125014	0.0153259		0.962716	0.0469117	0.0466412	0.957172	0.0146154	0.0453378
0.9403	1.05359	0.608635	1.06012	1.0596	0.0740244	0.175986		0.955611	0.655679	0.946346	0.960104	0.124458	0.0147708		0.963457	0.0469117	0.0465736	0.958711	0.0145298	0.0456802
0.9413	1.05333	0.60959	1.06019	1.05965	0.0738597	0.176679		0.956504	0.658582	0.947239	0.960326	0.130565	0.0149928		0.964	0.0467764	0.0465736	0.96025	0.0146154	0.0456802
0.9423	1.0537	0.609431	1.06061	1.06054	0.0752602	0.177074		0.957844	0.659587	0.948356	0.959661	0.134672	0.015548		0.963593	0.0469793	0.046844	0.961187	0.0147866	0.045509
0.9433	1.05402	0.608954	1.06117	1.06049	0.0766602	0.177173		0.958736	0.659474	0.949249	0.958995	0.135782	0.01577		0.963932	0.0471821	0.0469117	0.961961	0.0147866	0.0452523
0.9443	1.05375	0.608371	1.06089	1.05999	0.0769481	0.177123		0.959332	0.659474	0.94936	0.959438	0.13223	0.0148819		0.96434	0.047385	0.0469793	0.961531	0.0144443	0.0452523
0.9453	1.05349	0.607417	1.06047	1.05974	0.0764541	0.176184		0.960374	0.660144	0.95003	0.959105	0.131453	0.0142158		0.963796	0.0470469	0.0469117	0.961703	0.0140164	0.0452523
0.9463	1.05359	0.60641	1.06026	1.05926	0.0763308	0.176086		0.960374	0.65981	0.950253	0.958772	0.130898	0.0137716		0.963728	0.0469793	0.0467764	0.961617	0.0146154	0.0450811
0.9473	1.05375	0.606039	1.06075	1.0596	0.0760835	0.176332		0.959481	0.658917	0.949471	0.958105	0.130787	0.0133276		0.962648	0.0471145	0.0468441	0.961531	0.0148721	0.0445677
0.9483	1.05359	0.605561	1.06089	1.0596	0.0754248	0.175492		0.958141	0.659474	0.948243	0.957328	0.130898	0.0129945		0.961907	0.0471821	0.0469117	0.961703	0.0149577	0.0443965
0.9493	1.05397	0.60641	1.06125	1.05926	0.0740244	0.175147		0.956802	0.65981	0.946905	0.957439	0.130676	0.0124394		0.961969	0.0471145	0.0467764	0.9635	0.0155568	0.0442253
0.9503	1.05445	0.607575	1.06181	1.05866	0.0715537	0.175641		0.956802	0.659587	0.947016	0.957995	0.138891	0.0119954		0.963191	0.0468441	0.0467764	0.963242	0.0153856	0.0443965
0.9513	1.05392	0.608371	1.06139	1.05851	0.0710595	0.175838		0.955909	0.65914	0.947239	0.958216	0.142666	0.0129945		0.964944	0.0465736	0.0465736	0.961789	0.0156423	0.0447388
0.9523	1.05338	0.608635	1.06103	1.05807	0.0722538	0.175888		0.957099	0.65914	0.947128	0.958105	0.139335	0.0147709		0.965895	0.0467764	0.0467088	0.961187	0.0150433	0.0449099
0.9533	1.05365	0.608848	1.06096	1.05861	0.0725008	0.176135		0.957397	0.658806	0.948132	0.957884	0.135672	0.0154369		0.966235	0.0468441	0.0464383	0.959648	0.0147866	0.0449099
0.9543	1.05386	0.608477	1.06033	1.0592	0.0735715	0.176382		0.955909	0.658693	0.946681	0.958328	0.131786	0.0149928		0.965623	0.0467764	0.0467088	0.958109	0.0147866	0.0450811
0.9553	1.05407	0.608106	1.06026	1.05974	0.0742715	0.177321		0.954717	0.658693	0.946011	0.95855	0.130675	0.0133276		0.964543	0.0469793	0.046506	0.957172	0.0152145	0.0449099
0.9563	1.05333	0.608317	1.06005	1.06014	0.0754248	0.176728		0.955462	0.658804	0.946458	0.958772	0.131786	0.0121064		0.964407	0.0467764	0.046506	0.957336	0.0152145	0.0451666
0.9573	1.05291	0.609007	1.05955	1.06014	0.0751774	0.176332		0.955909	0.659251	0.947128	0.95855	0.132341	0.0122174		0.963457	0.0466412	0.0465736	0.958367	0.0148721	0.0449955
0.9583	1.05211	0.609113	1.05941	1.05955	0.074848	0.176234		0.955314	0.660257	0.946235	0.958661	0.135338	0.0123284		0.962784	0.0468441	0.0466412	0.958797	0.0147866	0.0449955
0.9593	1.05211	0.609378	1.05976	1.0592	0.0748892	0.177074		0.955164	0.661372	0.946346	0.959327	0.138891	0.0122174		0.962716	0.0468441	0.0467764	0.960852	0.0144442	0.0450811
0.9603	1.05201	0.608901	1.0599	1.0594	0.0737362	0.177321		0.955314	0.65847	0.946346	0.959549	0.141223	0.0128835		0.962784	0.0470469	0.0470469	0.961187	0.0141875	0.0454234
0.9613	1.05195	0.608635	1.05976	1.06029	0.0726655	0.176827		0.955611	0.656349	0.946011	0.958772	0.140778	0.0128835		0.962988	0.0470469	0.0465736	0.961273	0.0141875	0.045509
0.9623	1.05291	0.608424	1.06047	1.06039	0.0718007	0.176184		0.956951	0.657466	0.946569	0.959661	0.139668	0.0128835		0.961907	0.0471145	0.0467088	0.961531	0.0145298	0.0454234
0.9633	1.05365	0.609113	1.06103	1.05995	0.0703182	0.176135		0.957249	0.658804	0.947016	0.959327	0.138003	0.0117733		0.962037	0.0468441	0.0468441	0.961531	0.014701	0.045509
0.9643	1.05386	0.609166	1.06103	1.0595	0.0694123	0.176234		0.957249	0.657689	0.947686	0.958882	0.13545	0.0117733		0.963259	0.0469793	0.0469117	0.959141	0.0146154	0.0451666
0.9653	1.05375	0.609166	1.06167	1.05955	0.0694123	0.175986		0.955909	0.656796	0.946458	0.958882	0.133784	0.0122174		0.964877	0.0471822	0.0469793	0.956227	0.014701	0.0451666
0.9663	1.05365	0.608954	1.06132	1.06009	0.0701535	0.17569		0.955909	0.656126	0.946124	0.95855	0.131564	0.0127725		0.965759	0.0472498	0.0471145	0.954602	0.0147866	0.0452523
0.9673	1.05333	0.60906	1.0611	1.06054	0.0706065	0.175492		0.955314	0.65713	0.946011	0.95855	0.129676	0.0129945		0.965691	0.0473173	0.0471145	0.955711	0.0147866	0.0454234
0.9683	1.05306	0.608954	1.06082	1.06039	0.0712241	0.1749		0.954867	0.657577	0.945565	0.958328	0.126901	0.0132166		0.964475	0.0471145	0.0468441	0.956313	0.0148721	0.0456802
0.9693	1.0527	0.608053	1.06054	1.06054	0.0711006	0.174109		0.954717	0.658582	0.945454	0.958439	0.125791	0.0134386		0.963728	0.0468441	0.0466412	0.955883	0.0150433	0.0458513
0.9703	1.05222	0.607152	1.05969	1.06089	0.0723772	0.173269		0.953825	0.658582	0.945007	0.956996	0.127234	0.0134386		0.963728	0.0468441	0.0467088	0.955117	0.0152145	0.0455945
0.9713	1.05163	0.607364	1.05899	1.06103	0.0733656	0.17312		0.954569	0.656461	0.945007	0.956441	0.131231	0.0143268		0.962852	0.0470469	0.0469117	0.953742	0.0149577	0.0455945
0.9723	1.05185	0.607788	1.05926	1.06108	0.0745598	0.173615		0.955314	0.655234	0.945788	0.956773	0.134339	0.015437		0.96258	0.0471145	0.0471145	0.955031	0.0150433	0.0454234
0.9733	1.05211	0.607628	1.05955	1.06054	0.0760008	0.173961		0.955164	0.654564	0.945677	0.957107	0.135338	0.0154369		0.962173	0.0471821	0.0469793	0.956227	0.0147866	0.0454234
0.9743	1.0528	0.606993	1.05969	1.0602	0.0753008	0.174653		0.955909	0.655457	0.946122	0.95855	0.134006	0.0145488		0.962037	0.0471145	0.0471821	0.956656	0.0150433	0.0453378
0.9753	1.05291	0.607099	1.05962	1.05995	0.0751774	0.175196		0.955462	0.655902	0.945899	0.959438	0.133673	0.0139936		0.963191	0.0470469	0.0469117	0.95657	0.0153856	0.0451666
0.9763	1.05237	0.606145	1.05905	1.06064	0.0744774	0.176332		0.95442	0.656126	0.944895	0.959549	0.132785	0.0137716		0.964815	0.0471821	0.0470469	0.956227	0.0147866	0.0449955
0.9773	1.0528	0.606092	1.05962	1.06108	0.0739009	0.176679		0.953379	0.656572	0.944226	0.958882	0.132008	0.0134386		0.96542	0.0471821	0.0471145	0.95657	0.014701	0.0446532
0.9783	1.05359	0.60625	1.06026	1.06133	0.074395	0.176975		0.953379	0.655457	0.944448	0.957662	0.132119	0.0126615		0.964543	0.0471822	0.0468441	0.957172	0.014102	0.0446532
0.9793	1.0537	0.605615	1.06033	1.06083	0.074148	0.177025		0.95442	0.656685	0.945899	0.958105	0.13334	0.0134386		0.964475	0.0472498	0.0470469	0.95657	0.0141875	0.0449099
0.9803	1.05381	0.605403	1.06033	1.06068	0.0755068	0.176975		0.955314	0.654451	0.946569	0.958995	0.138891	0.0142158		0.96508	0.0469117	0.0469117	0.956828	0.0139308	0.0449099
0.9813	1.05354	0.605403	1.06012	1.06064	0.0768662	0.177717		0.955314	0.654787	0.946235	0.959659	0.142222	0.0143268		0.964877	0.0471821	0.0467088	0.956656	0.0138452	0.0449099
0.9823	1.05375	0.605085	1.06019	1.06128	0.0768248	0.177617		0.955314	0.657355	0.946235	0.958661	0.140668	0.0144378		0.963932	0.0471821	0.0469117	0.956227	0.0142731	0.0449099
0.9833	1.05381	0.604555	1.06047	1.06114	0.0759188	0.176679		0.955462	0.65914	0.946235	0.958105	0.135782	0.015548		0.963728	0.0472498	0.0471145	0.955883	0.0145298	0.0450811
0.9843	1.05333	0.604714	1.0599	1.06039	0.0755481	0.175938		0.955909	0.662265	0.946458	0.956996	0.134561	0.01577		0.965148	0.0469793	0.0467764	0.955539	0.0141875	0.0450811
0.9853	1.05285	0.604979	1.05969	1.0602	0.0750951	0.176086		0.955314	0.663382	0.946011	0.957884	0.132896	0.0149928		0.966975	0.0470469	0.0467764	0.955117	0.0144443	0.0449955
0.9863	1.05237	0.605668	1.05948	1.06059	0.0750951	0.17658		0.955164	0.66327	0.945788	0.958882	0.132452	0.0136607		0.966907	0.0471145	0.0469793	0.956141	0.0145298	0.0447388
0.9873	1.0528	0.606197	1.05976	1.06054	0.0749716	0.176086		0.955462	0.662154	0.945899	0.958439	0.13223	0.0127725		0.966235	0.0469117	0.046844	0.95657	0.0146154	0.0447388
0.9883	1.05328	0.607046	1.06026	1.05999	0.074148	0.175592		0.954717	0.662154	0.945565	0.958439	0.134561	0.0131055		0.966031	0.0468441	0.0466412	0.957422	0.0150433	0.0449099
0.9893	1.05264	0.607841	1.0599	1.05955	0.073242	0.175196		0.95442	0.662042	0.945007	0.958439	0.136893	0.0132166		0.966031	0.0468441	0.0465736	0.959219	0.0146154	0.0447388
0.9903	1.05227	0.607682	1.05997	1.0594	0.0722536	0.175443		0.954867	0.662265	0.945454	0.957995	0.132341	0.0139936		0.966031	0.0467088	0.0465736	0.96025	0.0148721	0.0454234
0.9913	1.05264	0.606568	1.06005	1.05989	0.0708947	0.175344		0.955015	0.662601	0.945454	0.957884	0.132563	0.0148819		0.966302	0.046844	0.0467088	0.96068	0.0149577	0.0454234
0.9923	1.05259	0.605721	1.06005	1.06034	0.0708123	0.174603		0.955462	0.661372	0.945341	0.958772	0.135782	0.01577		0.967586	0.0469793	0.0466412	0.960594	0.0153	0.0454234
0.9933	1.05285	0.605774	1.06005	1.06044	0.0715124	0.174307		0.955314	0.658917	0.945341	0.958772	0.136227	0.0161031		0.967586	0.0468441	0.0463707	0.959477	0.0150433	0.0450811
0.9943	1.05306	0.606039	1.06012	1.06114	0.0710183	0.174455		0.954569	0.656908	0.944895	0.958216	0.135893	0.015548		0.966568	0.0466412	0.0467088	0.957172	0.0152145	0.0452523
0.9953	1.05259	0.605561	1.05976	1.06123	0.0712242	0.174208		0.95323	0.656126	0.944784	0.958105	0.135672	0.0149928		0.965759	0.0467764	0.0465736	0.955453	0.0152145	0.0454234
0.9963	1.05291	0.60535	1.06026	1.06108	0.0717595	0.174208		0.950848	0.6578	0.943779	0.956662	0.134783	0.0149928		0.965895	0.0469117	0.0467088	0.954773	0.0152145	0.0449955
0.9973	1.05365	0.60535	1.06089	1.06108	0.0720477	0.174553		0.9507	0.660257	0.943333	0.955664	0.13445	0.0151039		0.966432	0.0469117	0.0467764	0.956398	0.0148721	0.0449099
0.9983	1.05386	0.605508	1.06117	1.06083	0.072089	0.174653		0.951742	0.663159	0.944226	0.955885	0.135116	0.0156591		0.966432	0.0469793	0.0469117	0.957852	0.0147866	0.0446532
0.9993	1.05375	0.606515	1.06139	1.06074	0.072336	0.174998		0.953825	0.663716	0.945341	0.957439	0.136004	0.0156591		0.965352	0.0468441	0.0466412	0.957594	0.0146154	0.0449099
1.0003	1.05375	0.607841	1.06117	1.06114	0.0729538	0.174603		0.954272	0.663493	0.945341	0.958882	0.134561	0.0153259		0.964679	0.0470469	0.0469793	0.957258	0.0147866	0.0448244
1.0013	1.05375	0.608317	1.06117	1.06118	0.0739009	0.174603		0.954569	0.662265	0.945788	0.958772	0.129565	0.0146599		0.964272	0.0471821	0.0469793	0.956828	0.0143587	0.0449955
1.0023	1.05412	0.608317	1.06132	1.06108	0.0747656	0.174998		0.955016	0.661372	0.945677	0.957773	0.126124	0.0144378		0.963593	0.047385	0.0469117	0.957336	0.0146154	0.0449099
1.0033	1.05359	0.608317	1.06061	1.06103	0.0753008	0.175443		0.95576	0.660033	0.946346	0.957107	0.127234	0.0149928		0.963056	0.047385	0.0470469	0.956227	0.0150433	0.0448244
1.0043	1.05323	0.608371	1.06026	1.06089	0.0753421	0.17569		0.956504	0.658582	0.946569	0.956662	0.128122	0.0153259		0.963395	0.0472498	0.0472498	0.955375	0.0149577	0.0451666
1.0053	1.05301	0.607628	1.05997	1.06039	0.0760421	0.175443		0.955015	0.658359	0.946011	0.955774	0.129898	0.0148819		0.964	0.0471145	0.046844	0.95443	0.0146154	0.0450811
1.0063	1.05206	0.607205	1.05912	1.0597	0.0760008	0.175888		0.955314	0.658023	0.946346	0.955553	0.130564	0.0145488		0.964204	0.0471821	0.0470469	0.954258	0.0146154	0.0452523
1.0073	1.05179	0.605986	1.05905	1.05965	0.0751363	0.175888		0.956951	0.656349	0.948243	0.955885	0.129343	0.0145488		0.964068	0.0467764	0.0466412	0.955289	0.0146154	0.045509
1.0083	1.05201	0.605879	1.05948	1.0602	0.0743539	0.175443		0.957397	0.656349	0.948579	0.956108	0.125679	0.0143268		0.963864	0.0467764	0.0466412	0.95768	0.0149577	0.045509
1.0093	1.05275	0.605455	1.06026	1.06064	0.0735303	0.175048		0.957397	0.656349	0.948802	0.955996	0.123681	0.0134386		0.964068	0.0469117	0.046506	0.955117	0.0148721	0.045509
1.0103	1.05423	0.60519	1.06188	1.06133	0.0726243	0.175838		0.957546	0.656349	0.948243	0.955442	0.124125	0.0132166		0.964475	0.0467088	0.0464383	0.953656	0.0150433	0.0451666
1.0113	1.05497	0.605244	1.06308	1.06108	0.0734067	0.176926		0.957546	0.655679	0.948579	0.955885	0.130342	0.0125505		0.964815	0.0467764	0.0464383	0.953656	0.0150433	0.045509
1.0123	1.05428	0.605774	1.06287	1.06029	0.0741892	0.177123		0.957844	0.657019	0.948802	0.955774	0.134672	0.0131055		0.964475	0.0467764	0.0465736	0.954773	0.0149577	0.045509
1.0133	1.05328	0.605721	1.0616	1.06014	0.0748892	0.177222		0.957249	0.6578	0.947686	0.956773	0.135338	0.0135496		0.964877	0.0468441	0.0467088	0.954516	0.0147866	0.0458513
1.0143	1.05296	0.606515	1.06075	1.06064	0.0751774	0.177469		0.95576	0.657355	0.946235	0.956441	0.134561	0.0129945		0.964475	0.0472498	0.0468441	0.954172	0.0144442	0.0453378
1.0153	1.05323	0.606886	1.06082	1.06118	0.0755481	0.177371		0.953974	0.657019	0.945118	0.956662	0.132452	0.0136607		0.964543	0.0472498	0.0470469	0.953234	0.0148722	0.0451666
1.0163	1.05354	0.606092	1.06089	1.06143	0.0761248	0.177074		0.953825	0.656349	0.944895	0.957107	0.131564	0.0138827		0.964475	0.0471822	0.0472498	0.952547	0.0148722	0.0453378
1.0173	1.05323	0.606463	1.06068	1.06168	0.0765361	0.176777		0.954272	0.65501	0.945341	0.956996	0.13223	0.0141047		0.963728	0.0470469	0.0468441	0.953656	0.0147866	0.0449955
1.0183	1.05312	0.606939	1.06082	1.06276	0.0760008	0.175394		0.953825	0.65367	0.94523	0.95633	0.131786	0.0139936		0.96366	0.0470469	0.0468441	0.954859	0.0149577	0.0450811
1.0193	1.05365	0.607894	1.06117	1.06296	0.075054	0.174208		0.95323	0.65367	0.94456	0.955219	0.130454	0.0147708		0.963932	0.0470469	0.0467764	0.958883	0.0151289	0.0451666
1.0203	1.05423	0.608106	1.06188	1.06271	0.0753835	0.173664		0.953379	0.65501	0.944003	0.955219	0.135116	0.0153259		0.96434	0.0471145	0.0470469	0.961273	0.0148721	0.0455945
1.0213	1.05466	0.607575	1.06266	1.06172	0.0747656	0.173763		0.95308	0.65713	0.943444	0.955664	0.143999	0.0154369		0.964815	0.0471821	0.0469117	0.96068	0.0147866	0.045509
1.0223	1.05418	0.607575	1.06188	1.06118	0.0737774	0.174603		0.952635	0.659474	0.942997	0.956551	0.147995	0.0144378		0.965284	0.0471821	0.0469117	0.959141	0.0147866	0.0450811
1.0233	1.05434	0.606886	1.06203	1.06128	0.0727066	0.174899		0.952932	0.661484	0.94322	0.958105	0.145108	0.0138827		0.964679	0.0471821	0.0469117	0.957508	0.014701	0.0451666
1.0243	1.05476	0.606568	1.06216	1.06222	0.0721302	0.174801		0.952635	0.660814	0.94389	0.958216	0.141	0.0133276		0.964543	0.0468441	0.0466412	0.956227	0.0145298	0.0451666
1.0253	1.05492	0.606939	1.0621	1.06237	0.0726655	0.174899		0.953527	0.659363	0.944114	0.957328	0.137226	0.0122174		0.964815	0.0469793	0.0467088	0.955883	0.0147866	0.0452523
1.0263	1.05492	0.607364	1.06188	1.06212	0.072336	0.175196		0.953677	0.658693	0.944448	0.95633	0.134894	0.0117733		0.96508	0.0472498	0.0471822	0.955883	0.0148722	0.0451666
1.0273	1.05508	0.607946	1.06216	1.06168	0.0717595	0.175344		0.954717	0.658359	0.945007	0.956219	0.133562	0.0131055		0.964877	0.0471821	0.0470469	0.955453	0.0147866	0.0450811
1.0283	1.0555	0.608265	1.0628	1.06207	0.0717595	0.175147		0.95576	0.657912	0.945565	0.954109	0.135227	0.0138827		0.964136	0.047385	0.0471822	0.956141	0.0150433	0.0451666
1.0293	1.05471	0.608477	1.06181	1.06276	0.0724184	0.175196		0.955314	0.657577	0.945565	0.954553	0.134117	0.0146599		0.96366	0.0475202	0.0473173	0.957937	0.0150433	0.0453378
1.0303	1.05386	0.608159	1.06089	1.0636	0.0731596	0.175542		0.955909	0.656349	0.945788	0.95533	0.136338	0.0145488		0.962852	0.0473173	0.0470469	0.958969	0.0147866	0.0449955
1.0313	1.0537	0.607735	1.06096	1.06291	0.0724595	0.176135		0.956207	0.657577	0.946124	0.955442	0.142777	0.0139936		0.96258	0.0469793	0.0467764	0.959305	0.0147866	0.0449099
1.0323	1.05328	0.607575	1.06096	1.06222	0.0717595	0.175344		0.956802	0.658359	0.946681	0.957107	0.144553	0.0145488		0.962105	0.046844	0.0466412	0.959562	0.0146154	0.0443965
1.0333	1.05306	0.608053	1.06075	1.06103	0.0727478	0.174702		0.957249	0.658136	0.947462	0.958216	0.142111	0.0153259		0.963056	0.0467764	0.0467088	0.958539	0.0149577	0.0450811
1.0343	1.0528	0.608053	1.06026	1.05935	0.0725832	0.174801		0.957397	0.658023	0.947128	0.957773	0.139001	0.01577		0.963457	0.046844	0.046506	0.955797	0.0148722	0.0455945
1.0353	1.05243	0.607628	1.05997	1.05935	0.0721713	0.175097		0.957249	0.657689	0.946681	0.957328	0.136559	0.015992		0.964	0.0469793	0.0468441	0.954859	0.014701	0.045509
1.0363	1.05296	0.607575	1.06033	1.0596	0.0725832	0.175196		0.956951	0.65501	0.945899	0.956996	0.133673	0.0164362		0.964747	0.0467764	0.046844	0.95443	0.0147866	0.0453378
1.0373	1.05359	0.607417	1.06019	1.05985	0.0722125	0.175492		0.956057	0.654898	0.945118	0.955996	0.131564	0.0162141		0.964	0.0469793	0.0467088	0.954859	0.0145298	0.0451666
1.0383	1.05381	0.607311	1.06061	1.06114	0.0726243	0.175986		0.95442	0.657466	0.944226	0.954776	0.132008	0.0162141		0.963056	0.0469793	0.046506	0.956227	0.0147866	0.0448244
1.0393	1.05375	0.606886	1.06061	1.06168	0.0719654	0.176332		0.95323	0.658693	0.944337	0.953665	0.132008	0.0153259		0.962784	0.0470469	0.0466412	0.958023	0.0147866	0.0450811
1.0403	1.05375	0.606039	1.0611	1.06172	0.0709359	0.176876		0.95323	0.660368	0.944226	0.953665	0.131231	0.0142158		0.963191	0.0471145	0.0467764	0.959906	0.0147866	0.0453378
1.0413	1.05412	0.605032	1.06153	1.06108	0.0710183	0.176876		0.952635	0.662265	0.944003	0.953443	0.135338	0.0122173		0.963259	0.047385	0.0469117	0.958711	0.0147866	0.0455945
1.0423	1.0546	0.604661	1.06117	1.06083	0.0728714	0.176679		0.951742	0.660702	0.943556	0.953776	0.137004	0.0112182		0.962716	0.047385	0.0471821	0.958711	0.0149577	0.0452523
1.0433	1.05445	0.60535	1.0611	1.06049	0.0741892	0.17653		0.952337	0.658917	0.944003	0.955108	0.136449	0.0109962		0.963525	0.0471821	0.0471145	0.959305	0.014701	0.0449955
1.0443	1.05423	0.606515	1.06103	1.06098	0.0744774	0.176283		0.952783	0.657577	0.944114	0.955885	0.133784	0.0127724		0.964475	0.0472498	0.0469793	0.956313	0.0148721	0.0451666
1.0453	1.05397	0.607205	1.06061	1.06148	0.0741068	0.175838		0.952932	0.657019	0.943667	0.956108	0.134006	0.0137716		0.965759	0.0471821	0.0470469	0.954688	0.0143587	0.0451666
1.0463	1.0537	0.60747	1.06026	1.06177	0.0729538	0.175938		0.951742	0.656461	0.943333	0.955664	0.134117	0.0132166		0.965691	0.0472498	0.0468441	0.954773	0.0144442	0.0449099
1.0473	1.05328	0.607735	1.06026	1.06114	0.0726655	0.175938		0.951742	0.656461	0.943556	0.955219	0.132008	0.0132165		0.965148	0.0470469	0.0469117	0.956055	0.0145298	0.0450811
1.0483	1.05349	0.607417	1.06082	1.06059	0.0731596	0.176432		0.952187	0.656572	0.94389	0.954553	0.128788	0.0121064		0.964272	0.0467088	0.0465736	0.958195	0.0143587	0.0453378
1.0493	1.05386	0.607046	1.06153	1.06103	0.0731596	0.17658		0.952187	0.656238	0.944114	0.954664	0.127345	0.0127725		0.963525	0.0466412	0.0464383	0.958969	0.0141875	0.0451666
1.0503	1.05365	0.607841	1.06125	1.06093	0.0726243	0.176876		0.952485	0.656685	0.944337	0.955108	0.128566	0.0139936		0.962852	0.0469793	0.0466412	0.958711	0.0145298	0.0451666
1.0513	1.05354	0.608689	1.0611	1.06059	0.0722125	0.177173		0.952187	0.656685	0.943667	0.956108	0.132119	0.0145488		0.961432	0.0471821	0.0469793	0.957422	0.0146154	0.0449099
1.0523	1.05338	0.60906	1.0611	1.05989	0.0725008	0.177717		0.950848	0.656685	0.942552	0.957328	0.132896	0.0144378		0.961568	0.0471821	0.0470469	0.957336	0.0145298	0.0449099
1.0533	1.05275	0.608477	1.06054	1.0597	0.0716359	0.178013		0.951295	0.655121	0.942105	0.957884	0.132452	0.0141047		0.961364	0.0472498	0.0471145	0.957937	0.0141875	0.0449955
1.0543	1.05227	0.607523	1.06033	1.0597	0.0713889	0.176629		0.951742	0.65434	0.942663	0.957662	0.130898	0.0141047		0.961364	0.0469793	0.0467088	0.959305	0.0140164	0.0453378
1.0553	1.05285	0.607046	1.06033	1.0598	0.0720066	0.174603		0.95308	0.655457	0.94322	0.956551	0.130009	0.0137716		0.960753	0.0471821	0.0467764	0.959477	0.0144442	0.0450811
1.0563	1.05333	0.606781	1.06082	1.05955	0.073695	0.173763		0.954122	0.656126	0.944003	0.95533	0.13012	0.0136607		0.960352	0.0470469	0.0468441	0.959648	0.0147866	0.0453378
1.0573	1.05349	0.605826	1.06153	1.05974	0.0740656	0.174603		0.954867	0.657019	0.945118	0.954886	0.131564	0.0137716		0.960284	0.0471145	0.0469117	0.959391	0.0146154	0.0450811
1.0583	1.05365	0.605297	1.06153	1.06054	0.0743127	0.174949		0.953825	0.658582	0.944114	0.953554	0.130453	0.0142157		0.960012	0.0471821	0.0469117	0.957336	0.0146154	0.0454234
1.0593	1.05381	0.604661	1.06146	1.06128	0.0746833	0.175592		0.953378	0.658136	0.943109	0.952999	0.128677	0.0156591		0.959537	0.0470469	0.0467088	0.957	0.0151289	0.0454234
1.0603	1.05397	0.605085	1.06203	1.06089	0.0758361	0.176234		0.951592	0.655679	0.941882	0.953554	0.12679	0.0163251		0.958864	0.0469117	0.0467764	0.958023	0.0146154	0.0460224
1.0613	1.05386	0.606197	1.06203	1.06103	0.0770714	0.176481		0.950402	0.653783	0.941435	0.953332	0.129898	0.015548		0.959333	0.0469117	0.0467764	0.959562	0.0144442	0.0460224
1.0623	1.05381	0.607046	1.06181	1.06089	0.0765774	0.175789		0.950848	0.651885	0.942439	0.953109	0.132452	0.0151039		0.959877	0.0470469	0.0468441	0.959305	0.014701	0.0457657
1.0633	1.05386	0.607046	1.06146	1.06064	0.0760421	0.175344		0.951742	0.653224	0.943333	0.952777	0.132674	0.0146599		0.961907	0.0469117	0.0466412	0.959141	0.0151289	0.045509
1.0643	1.05349	0.606728	1.06089	1.06083	0.0746832	0.17574		0.952635	0.65501	0.944226	0.952555	0.131564	0.0146599		0.963525	0.0467088	0.0466412	0.957594	0.0151289	0.0451666
1.0653	1.05365	0.605986	1.06012	1.06143	0.0737362	0.176036		0.952039	0.656238	0.94389	0.952111	0.130342	0.0152149		0.964679	0.0467764	0.0465736	0.956484	0.0148722	0.0449099
1.0663	1.05338	0.606197	1.05983	1.06187	0.0734479	0.176036		0.951592	0.657242	0.942997	0.952555	0.130342	0.0151039		0.965556	0.0469793	0.0467764	0.957594	0.014701	0.0449955
1.0673	1.05375	0.606357	1.0604	1.06177	0.0739832	0.176432		0.951295	0.6578	0.942886	0.953665	0.132674	0.0144378		0.965284	0.0470469	0.0467088	0.958625	0.014701	0.0452523
1.0683	1.05349	0.606304	1.06068	1.06118	0.0745186	0.176382		0.95189	0.658023	0.943333	0.954331	0.13667	0.0139936		0.964877	0.0470469	0.0467088	0.959219	0.0149577	0.045509
1.0693	1.05323	0.606781	1.06026	1.06054	0.0740656	0.176086		0.952039	0.657577	0.943444	0.953999	0.138003	0.0144378		0.964204	0.0466412	0.0467088	0.96068	0.0152145	0.0455945
1.0703	1.05301	0.606675	1.05997	1.0594	0.0732832	0.175641		0.951592	0.658023	0.942774	0.953554	0.134561	0.0154369		0.964204	0.0467764	0.0464383	0.961187	0.0151289	0.0454234
1.0713	1.05338	0.606728	1.06012	1.05901	0.0726243	0.175196		0.951592	0.657353	0.942774	0.952666	0.133895	0.01577		0.963593	0.0468441	0.0466412	0.961961	0.0148721	0.0453378
1.0723	1.05349	0.607311	1.06033	1.05955	0.0724184	0.17569		0.952783	0.658359	0.942552	0.952443	0.135005	0.0163251		0.96366	0.046844	0.0466412	0.962047	0.0148721	0.0452523
1.0733	1.05338	0.607523	1.06061	1.06039	0.0739832	0.17574		0.952932	0.660368	0.942552	0.952555	0.135005	0.0167692		0.963796	0.0469793	0.0469793	0.961875	0.0149577	0.045509
1.0743	1.05381	0.607841	1.06132	1.06172	0.0740656	0.17569		0.952932	0.660925	0.942774	0.953443	0.13445	0.0156589		0.964679	0.0474526	0.0469793	0.960422	0.014701	0.0457657
1.0753	1.0537	0.607735	1.06117	1.06217	0.0736126	0.175986		0.952635	0.660702	0.94322	0.954776	0.133451	0.0158811		0.963932	0.0475202	0.0472498	0.961273	0.0149577	0.0456802
1.0763	1.05344	0.606568	1.06082	1.06153	0.0749304	0.17574		0.952485	0.660033	0.944003	0.954553	0.13334	0.0162141		0.963259	0.0475878	0.047385	0.961961	0.0148721	0.0454234
1.0773	1.05312	0.606622	1.06061	1.06143	0.0760835	0.175789		0.953527	0.660144	0.944784	0.955108	0.131564	0.01577		0.96292	0.047385	0.0473173	0.961875	0.014701	0.0456802
1.0783	1.05323	0.606886	1.06005	1.06064	0.0753421	0.176135		0.955314	0.659251	0.945677	0.954776	0.13334	0.0138827		0.962309	0.0472498	0.0471145	0.961445	0.0147866	0.0451666
1.0793	1.05338	0.607523	1.05955	1.06009	0.0748892	0.175592		0.955164	0.657466	0.945454	0.955553	0.135672	0.0121063		0.961907	0.0471821	0.0469793	0.959477	0.0146154	0.0449099
1.0803	1.05349	0.607417	1.05955	1.05905	0.0744362	0.175246		0.955314	0.655457	0.945341	0.95633	0.137004	0.0122174		0.96258	0.0471822	0.0469117	0.957937	0.0148722	0.0449955
1.0813	1.05365	0.607523	1.0599	1.05911	0.0728714	0.174998		0.95442	0.655457	0.94456	0.956219	0.134117	0.0126615		0.964136	0.0472498	0.0471821	0.957422	0.0146154	0.0453378
1.0823	1.05338	0.607788	1.05997	1.0594	0.07143	0.175592		0.952635	0.656238	0.943333	0.956219	0.131009	0.0135496		0.964543	0.0475878	0.0472498	0.957766	0.0146154	0.0452523
1.0833	1.05312	0.607894	1.06005	1.0597	0.0711418	0.176283		0.95189	0.658136	0.943333	0.955664	0.129121	0.0139936		0.964611	0.0475202	0.0472498	0.958109	0.0149577	0.0453378
1.0843	1.05296	0.607628	1.06033	1.05999	0.0707712	0.176777		0.952932	0.660257	0.94389	0.955219	0.128677	0.0136607		0.965148	0.047385	0.0471145	0.958711	0.0151289	0.0454234
1.0853	1.05254	0.607682	1.06005	1.0598	0.0708123	0.176827		0.952039	0.661038	0.943556	0.955774	0.130009	0.0143268		0.96508	0.047385	0.0470469	0.958109	0.0151289	0.045509
1.0863	1.05275	0.607205	1.06061	1.0598	0.072336	0.176777		0.951592	0.660591	0.943333	0.954886	0.130454	0.0131056		0.964475	0.0470469	0.0469793	0.95657	0.014701	0.0455945
1.0873	1.05333	0.606463	1.06132	1.0597	0.0739421	0.176332		0.951295	0.660144	0.942997	0.953886	0.130898	0.0134386		0.963796	0.0470469	0.046844	0.956227	0.0150433	0.0455945
1.0883	1.05402	0.606197	1.06203	1.05985	0.0744774	0.17653		0.951592	0.65981	0.942997	0.95322	0.132896	0.0139936		0.964543	0.0472498	0.0471145	0.956828	0.0153	0.0460224
1.0893	1.05466	0.606092	1.0623	1.05995	0.0743127	0.176629		0.952039	0.660591	0.942774	0.952332	0.135672	0.0139936		0.964543	0.0469117	0.0467088	0.956313	0.0148721	0.0455945
1.0903	1.05545	0.605455	1.06259	1.06024	0.0734068	0.175986		0.952635	0.659251	0.942997	0.952999	0.139557	0.0139936		0.963056	0.0468441	0.0465736	0.956914	0.0142731	0.0454234
1.0913	1.05582	0.605244	1.06266	1.06039	0.0720478	0.174998		0.952337	0.659251	0.943444	0.953665	0.143443	0.0145488		0.962852	0.0467764	0.0464383	0.956227	0.0144442	0.0452523
1.0923	1.05561	0.605774	1.06287	1.06079	0.0699475	0.173911		0.952783	0.658804	0.943556	0.95322	0.143443	0.0147708		0.963259	0.0468441	0.0467088	0.956398	0.0144442	0.0449099
1.0933	1.05555	0.60641	1.06259	1.06068	0.0703594	0.173664		0.953825	0.660257	0.944337	0.95422	0.138114	0.0149928		0.963728	0.0468441	0.0467764	0.957172	0.0146154	0.0451666
1.0943	1.05503	0.606675	1.06195	1.06068	0.0727479	0.17401		0.953527	0.659921	0.944895	0.954553	0.135338	0.0145488		0.964747	0.0469117	0.0466412	0.960336	0.0144442	0.0450811
1.0953	1.05471	0.606568	1.0621	1.06133	0.0742716	0.174998		0.953677	0.65847	0.944895	0.955553	0.133229	0.0144378		0.965691	0.0467088	0.0466412	0.960336	0.0147866	0.0449099
1.0963	1.05455	0.605774	1.06153	1.06177	0.0748068	0.175542		0.953825	0.657466	0.944448	0.956441	0.132341	0.0144378		0.965556	0.0466412	0.0467088	0.958281	0.0145298	0.0449955
1.0973	1.05466	0.605032	1.06181	1.06162	0.0745186	0.175147		0.95323	0.658359	0.943779	0.956219	0.131342	0.0141047		0.965148	0.0467764	0.0464383	0.957594	0.014701	0.0452523
1.0983	1.05529	0.604979	1.06252	1.06187	0.0739833	0.175196		0.952187	0.660033	0.942105	0.954886	0.129787	0.0137716		0.964136	0.0469117	0.0466412	0.959141	0.0146154	0.0451666
1.0993	1.05577	0.605137	1.06301	1.06177	0.0736538	0.174653		0.951592	0.660591	0.940876	0.953999	0.129898	0.0128835		0.963932	0.0471821	0.0468441	0.961273	0.014701	0.0448244
1.1003	1.05635	0.606145	1.06386	1.06187	0.0731184	0.173615		0.950997	0.660144	0.941101	0.954442	0.129121	0.0122174		0.96366	0.0471145	0.0469793	0.962984	0.0145298	0.0445676
1.1013	1.05646	0.607523	1.06386	1.06162	0.0730361	0.173516		0.950848	0.659474	0.941323	0.954665	0.133451	0.0118843		0.96366	0.0469117	0.0466412	0.962734	0.0140164	0.0450811
1.1023	1.05608	0.608159	1.06379	1.06108	0.0728302	0.174356		0.950848	0.660702	0.941101	0.954109	0.137781	0.0133276		0.963395	0.0469117	0.0467088	0.962984	0.0148722	0.0451666
1.1033	1.05508	0.607575	1.06273	1.06093	0.0734067	0.174307		0.950253	0.662154	0.940318	0.952111	0.13667	0.0134386		0.96366	0.0469117	0.0465736	0.96307	0.0150433	0.0452523
1.1043	1.05439	0.606993	1.06203	1.06103	0.0731596	0.175246		0.951147	0.660814	0.940876	0.951666	0.133118	0.0136607		0.962852	0.0470469	0.0467088	0.960336	0.0153	0.045509
1.1053	1.05397	0.606993	1.06153	1.06133	0.0733656	0.175196		0.952485	0.658247	0.942774	0.951445	0.130453	0.0132165		0.963457	0.0469117	0.0467764	0.958539	0.0150433	0.045509
1.1063	1.05338	0.60641	1.06103	1.06172	0.0730773	0.175246		0.952783	0.657353	0.94322	0.951334	0.130676	0.0135496		0.964877	0.0471145	0.0469117	0.957258	0.0150433	0.0455945
1.1073	1.05338	0.606781	1.06139	1.06172	0.0737362	0.174505		0.953379	0.656461	0.943779	0.951666	0.131009	0.0139936		0.965623	0.0469117	0.0466412	0.957766	0.0147866	0.0452523
1.1083	1.05428	0.607152	1.06223	1.06187	0.0734891	0.173664		0.953974	0.657353	0.94389	0.951445	0.131342	0.0147708		0.965963	0.0469117	0.0466412	0.958281	0.014701	0.0453378
1.1093	1.05428	0.606728	1.06259	1.06187	0.0732832	0.174356		0.954272	0.65713	0.944003	0.952555	0.132119	0.0148819		0.964944	0.0468441	0.046844	0.959562	0.0144442	0.0452523
1.1103	1.05418	0.606568	1.06273	1.06108	0.0728302	0.174751		0.954569	0.657242	0.944003	0.952777	0.138669	0.0148819		0.963525	0.0471145	0.0466412	0.959391	0.0145298	0.0455945
1.1113	1.0546	0.607575	1.06358	1.06089	0.0729538	0.175592		0.953677	0.658023	0.943667	0.952777	0.145108	0.0151039		0.962173	0.0468441	0.0467764	0.960078	0.014701	0.0450811
1.1123	1.05497	0.608795	1.06337	1.06138	0.0731185	0.176827		0.952783	0.658693	0.942886	0.953332	0.143665	0.0138827		0.962444	0.0469117	0.0468441	0.961703	0.0150433	0.0450811
1.1133	1.05503	0.608795	1.06301	1.06197	0.0726244	0.177914		0.950997	0.657577	0.942439	0.953665	0.140223	0.0126615		0.961907	0.0467764	0.0467088	0.963156	0.0152145	0.0450811
1.1143	1.05486	0.608265	1.06252	1.06212	0.072995	0.177815		0.950253	0.655679	0.941769	0.952888	0.137004	0.0121064		0.960753	0.0467088	0.0466412	0.964531	0.0151289	0.0449955
1.1153	1.05497	0.607523	1.06237	1.06202	0.0735303	0.177469		0.949807	0.655234	0.941658	0.952443	0.134783	0.0121064		0.960549	0.0467088	0.0465059	0.963414	0.0148721	0.0450811
1.1163	1.05455	0.606357	1.06203	1.06202	0.0728302	0.176876		0.95055	0.65434	0.942774	0.952443	0.134339	0.0126614		0.960549	0.0467764	0.046844	0.961961	0.0151289	0.0452523
1.1173	1.05402	0.605933	1.06153	1.06172	0.0725832	0.176876		0.951145	0.653894	0.943444	0.952888	0.132563	0.0138827		0.960617	0.0471821	0.0469117	0.961789	0.0146154	0.045509
1.1183	1.05328	0.605879	1.06047	1.06162	0.072542	0.176283		0.95189	0.65233	0.943779	0.952999	0.128899	0.0142158		0.960352	0.0472498	0.0469793	0.962648	0.0146154	0.045509
1.1193	1.05291	0.606092	1.05983	1.06168	0.0734891	0.17569		0.951592	0.652889	0.943667	0.953443	0.126013	0.0145488		0.960685	0.047385	0.0469793	0.962047	0.0148721	0.0454234
1.1203	1.05254	0.606197	1.05969	1.06183	0.0753835	0.175492		0.95189	0.651996	0.943444	0.95322	0.125458	0.0145488		0.961636	0.0470469	0.0470469	0.960938	0.014701	0.0456802
1.1213	1.05285	0.605933	1.06033	1.06187	0.0771128	0.175492		0.950997	0.653224	0.942663	0.953665	0.124236	0.0152149		0.962173	0.0469793	0.0467764	0.960508	0.0150433	0.0457657
1.1223	1.05317	0.605615	1.0611	1.06162	0.0776481	0.176135		0.949807	0.654117	0.940988	0.953776	0.12357	0.0149928		0.962309	0.0468441	0.0465736	0.960422	0.0147866	0.0454234
1.1233	1.05338	0.605774	1.06103	1.06168	0.0776068	0.176086		0.94817	0.656461	0.939984	0.954331	0.123792	0.0147708		0.96184	0.0467764	0.046506	0.960336	0.0147866	0.0459369
1.1243	1.05349	0.606197	1.06096	1.06183	0.0776481	0.176036		0.948318	0.658917	0.940318	0.954109	0.124791	0.0145488		0.96292	0.0469793	0.0466412	0.96068	0.0145298	0.0459369
1.1253	1.05333	0.607046	1.06026	1.06172	0.0765361	0.175986		0.948913	0.660925	0.940765	0.95533	0.125347	0.0149928		0.964475	0.0469117	0.0467088	0.959391	0.014701	0.0459369
1.1263	1.05323	0.607523	1.0604	1.06207	0.075054	0.176184		0.949658	0.661707	0.941101	0.954886	0.127345	0.0156589		0.965623	0.0469117	0.0467088	0.957422	0.0151289	0.0457657
1.1273	1.05354	0.607417	1.06082	1.06187	0.0740656	0.175592		0.950253	0.662712	0.941769	0.954442	0.131786	0.0161031		0.965623	0.0471821	0.0469117	0.958281	0.0148721	0.0456802
1.1283	1.05328	0.606675	1.06005	1.06207	0.0735302	0.174801		0.95055	0.663046	0.941882	0.953332	0.135672	0.0153259		0.965895	0.0471145	0.046844	0.957937	0.014701	0.045509
1.1293	1.05317	0.606728	1.05976	1.06153	0.0729126	0.174307		0.951295	0.662823	0.942105	0.953665	0.135338	0.015437		0.965691	0.0471821	0.0470469	0.957852	0.014701	0.0453378
1.1303	1.05323	0.607575	1.06012	1.06138	0.0727478	0.174653		0.951444	0.661372	0.942216	0.953886	0.131897	0.0156591		0.964877	0.0473173	0.0468441	0.958023	0.0148721	0.0455945
1.1313	1.05344	0.607841	1.06054	1.06118	0.0733655	0.175344		0.95055	0.659363	0.941882	0.952777	0.134117	0.01577		0.963525	0.0475202	0.0471821	0.959141	0.0147866	0.045509
1.1323	1.05412	0.607523	1.06132	1.06059	0.0738597	0.175542		0.95055	0.6578	0.941101	0.952332	0.136004	0.0156591		0.963728	0.0473173	0.0472498	0.960078	0.0147866	0.0453378
1.1333	1.05397	0.607311	1.06132	1.06089	0.0734479	0.175592		0.951444	0.656238	0.941658	0.952111	0.13667	0.0161031		0.96508	0.0469117	0.0469793	0.960422	0.0148722	0.0453378
1.1343	1.05359	0.607575	1.06103	1.06123	0.0736538	0.175443		0.952039	0.655457	0.942105	0.95322	0.135227	0.0152149		0.965012	0.0469793	0.0467088	0.961703	0.0142731	0.0450811
1.1353	1.05317	0.608265	1.06026	1.06276	0.0743127	0.175592		0.95189	0.655234	0.941769	0.953443	0.133562	0.015437		0.965623	0.0468441	0.0468441	0.96307	0.0141875	0.0447388
1.1363	1.05264	0.607946	1.05983	1.06331	0.0750539	0.176283		0.951444	0.655679	0.941212	0.953665	0.134228	0.0146599		0.965488	0.0469793	0.0469117	0.965039	0.014701	0.0452523
1.1373	1.05275	0.607364	1.06019	1.06306	0.0755481	0.176234		0.9507	0.654228	0.940095	0.954665	0.135227	0.0135496		0.964877	0.0471145	0.0467764	0.965211	0.0145298	0.0453378
1.1383	1.05333	0.607735	1.06075	1.06241	0.0756714	0.17653		0.950402	0.653447	0.940095	0.954997	0.136115	0.0131055		0.964543	0.0471145	0.0469793	0.963844	0.0145298	0.0452523
1.1393	1.05365	0.607523	1.06096	1.06262	0.0754654	0.176728		0.94936	0.653336	0.939537	0.95422	0.136892	0.0124394		0.964475	0.0471145	0.0469117	0.961789	0.0147009	0.0453378
1.1403	1.05312	0.607099	1.06068	1.06241	0.0747245	0.176926		0.949807	0.652554	0.940654	0.953665	0.128233	0.0122174		0.964475	0.0469793	0.0467088	0.959648	0.0147866	0.0455945
1.1413	1.05296	0.607311	1.06075	1.06168	0.0751363	0.17658		0.949955	0.652332	0.940207	0.952888	0.119018	0.0137718		0.964679	0.0467088	0.0463707	0.959734	0.0147866	0.0453378
1.1423	1.05312	0.60747	1.06082	1.06103	0.0753835	0.176777		0.94951	0.652443	0.939761	0.951889	0.115799	0.0141047		0.964611	0.0465736	0.046506	0.959648	0.0142731	0.0451666
1.1433	1.05338	0.606993	1.06089	1.06133	0.0741891	0.177173		0.949955	0.651885	0.940207	0.952555	0.116909	0.0136607		0.96434	0.0467088	0.0463031	0.959219	0.0142731	0.0449955
1.1443	1.05386	0.607099	1.06125	1.06153	0.0729538	0.17653		0.95055	0.651885	0.940765	0.952666	0.121572	0.0138827		0.964068	0.0467088	0.0463707	0.960164	0.0141875	0.0451666
1.1453	1.05423	0.60747	1.06139	1.06212	0.073242	0.175641		0.951145	0.653336	0.941769	0.951555	0.126013	0.0138827		0.96434	0.0467764	0.0467088	0.960594	0.0142731	0.0452523
1.1463	1.05365	0.607788	1.06096	1.06148	0.073695	0.174998		0.951444	0.65501	0.941212	0.950889	0.127234	0.0135496		0.964877	0.0467764	0.0466412	0.961273	0.0143587	0.0447388
1.1473	1.05296	0.607417	1.05997	1.06114	0.0737362	0.175048		0.95055	0.65713	0.940988	0.951334	0.129121	0.0131055		0.965216	0.0467764	0.0464383	0.961617	0.0144442	0.0448244
1.1483	1.05275	0.606834	1.05948	1.06138	0.0736126	0.174751		0.949807	0.658806	0.939984	0.951889	0.131009	0.0132166		0.965216	0.0469117	0.0467088	0.962477	0.0147866	0.0449099
1.1493	1.05285	0.606568	1.05969	1.06093	0.073695	0.174751		0.949063	0.657912	0.938867	0.951889	0.130786	0.0135496		0.965352	0.0469117	0.0467764	0.961617	0.0146154	0.0449099
1.1503	1.05317	0.606304	1.06012	1.06103	0.0748892	0.175838		0.948913	0.655568	0.939425	0.952332	0.127012	0.0142157		0.965895	0.0469793	0.0467764	0.961789	0.0146154	0.0453378
1.1513	1.05338	0.605244	1.06103	1.06074	0.0753835	0.176481		0.949063	0.655902	0.940431	0.952666	0.126346	0.0147708		0.964944	0.047385	0.0471822	0.962984	0.0145298	0.0450811
1.1523	1.05407	0.604714	1.06125	1.06108	0.0741068	0.176432		0.949211	0.656015	0.940431	0.953554	0.127456	0.0151039		0.964611	0.047385	0.0469793	0.961617	0.0147866	0.0451666
1.1533	1.05407	0.604819	1.06125	1.06118	0.0710182	0.176086		0.949063	0.655791	0.940542	0.952999	0.128899	0.0141047		0.964136	0.0472498	0.0469117	0.961273	0.0147866	0.0451666
1.1543	1.05381	0.605455	1.06125	1.06064	0.0693711	0.176086		0.949955	0.657242	0.940765	0.951889	0.129565	0.0145488		0.964543	0.0471822	0.0469117	0.960078	0.0147866	0.0454234
1.1553	1.05381	0.605826	1.06125	1.06068	0.0694534	0.175938		0.951592	0.659363	0.941212	0.950668	0.130231	0.0153259		0.965148	0.0470469	0.0467764	0.959219	0.0147866	0.0451666
1.1563	1.05349	0.606675	1.06068	1.06083	0.0713065	0.176382		0.95055	0.660702	0.940876	0.950778	0.130898	0.0148819		0.964944	0.0469117	0.0468441	0.960422	0.0148721	0.0456802
1.1573	1.05407	0.607311	1.06146	1.06064	0.0733244	0.176382		0.950253	0.659587	0.940765	0.951	0.132674	0.0142157		0.96542	0.0467088	0.046506	0.961187	0.0146154	0.0453378
1.1583	1.05428	0.606834	1.06181	1.06068	0.0745186	0.175838		0.950105	0.657689	0.940765	0.950334	0.130564	0.0147708		0.965963	0.0465736	0.0463707	0.960594	0.0143587	0.0449099
1.1593	1.0546	0.606197	1.0623	1.06074	0.0747245	0.176926		0.94951	0.655568	0.939872	0.950001	0.1279	0.0156591		0.966099	0.0469793	0.0465736	0.961102	0.0146154	0.0448244
1.1603	1.05434	0.605986	1.06188	1.06074	0.0738597	0.177914		0.94817	0.65501	0.938644	0.950889	0.129121	0.015992		0.966031	0.0469117	0.0465736	0.962305	0.0142731	0.0449955
1.1613	1.05407	0.606675	1.0611	1.06098	0.0733656	0.177765		0.948467	0.655457	0.938867	0.950778	0.134561	0.0165472		0.965556	0.0469117	0.0465736	0.962047	0.014701	0.0453378
1.1623	1.0545	0.607682	1.06139	1.06207	0.0722949	0.177617		0.949211	0.653894	0.939425	0.951777	0.13767	0.0168803		0.964272	0.0467764	0.0468441	0.962219	0.0149577	0.0451666
1.1633	1.05481	0.608317	1.06203	1.06212	0.0721302	0.177765		0.949658	0.65434	0.93898	0.952332	0.136338	0.0175464		0.963457	0.0467764	0.0463707	0.962047	0.0144442	0.0452523
1.1643	1.05503	0.608742	1.06259	1.06138	0.0726656	0.177074		0.94936	0.656238	0.939872	0.952443	0.134228	0.0171023		0.963259	0.046844	0.0466412	0.95982	0.0146154	0.0450811
1.1653	1.05434	0.60853	1.0623	1.06093	0.0737362	0.175938		0.950253	0.657466	0.940542	0.952111	0.132008	0.0164361		0.962784	0.0468441	0.0466412	0.957594	0.0143587	0.0449955
1.1663	1.05386	0.607523	1.0621	1.06059	0.0753008	0.17574		0.949807	0.656796	0.941101	0.952	0.131897	0.0156591		0.963056	0.0471145	0.0467764	0.957258	0.0142731	0.0449955
1.1673	1.05397	0.606886	1.06223	1.05974	0.0760008	0.175641		0.949063	0.656238	0.940654	0.951889	0.131453	0.015437		0.963395	0.0469117	0.0466412	0.958023	0.0141875	0.0450811
1.1683	1.0537	0.606622	1.06188	1.05891	0.0757541	0.174751		0.94817	0.655345	0.939984	0.952666	0.133673	0.015992		0.964611	0.0467764	0.0466412	0.959734	0.0141875	0.0451666
1.1693	1.05317	0.606357	1.06103	1.05861	0.074848	0.17485		0.94817	0.655234	0.939872	0.953776	0.137004	0.0161031		0.964136	0.0468441	0.0466412	0.963414	0.0145298	0.0455945
1.1703	1.0537	0.60747	1.06153	1.0592	0.0743539	0.175344		0.947872	0.656572	0.939984	0.953776	0.136893	0.0156591		0.963796	0.0468441	0.0467088	0.965469	0.0141875	0.0453378
1.1713	1.05434	0.607575	1.06181	1.05965	0.0735714	0.175888		0.947573	0.658693	0.940318	0.953109	0.13445	0.0153259		0.962444	0.0469117	0.0467088	0.965641	0.0146154	0.0453378
1.1723	1.05497	0.606834	1.06237	1.06074	0.0736127	0.176481		0.948615	0.660257	0.940765	0.953999	0.134117	0.0146599		0.961969	0.0468441	0.0466412	0.964953	0.014701	0.0452523
1.1733	1.05514	0.606251	1.06266	1.06143	0.0755895	0.176728		0.950105	0.65981	0.941212	0.953443	0.132674	0.0146599		0.962037	0.0469793	0.0467764	0.963672	0.0147866	0.0454234
1.1743	1.05481	0.606357	1.0621	1.06172	0.0772368	0.177074		0.949807	0.660257	0.940988	0.952555	0.132563	0.0151039		0.962716	0.0472498	0.0467764	0.963156	0.0147866	0.0452523
1.1753	1.05439	0.60625	1.06153	1.06197	0.0763714	0.176728		0.950105	0.659921	0.940765	0.951112	0.131231	0.0156591		0.963123	0.0471145	0.0467764	0.964781	0.0146154	0.0451666
1.1763	1.0545	0.605561	1.06203	1.06266	0.0755068	0.176382		0.949063	0.65847	0.939984	0.951	0.12901	0.0153259		0.962716	0.0471821	0.0469117	0.965211	0.0146154	0.0447388
1.1773	1.05508	0.606675	1.06259	1.06281	0.074601	0.176135		0.94817	0.656908	0.939648	0.952332	0.128011	0.0153259		0.963932	0.0471145	0.0467764	0.963672	0.014701	0.0454234
1.1783	1.05529	0.607894	1.0628	1.06227	0.0745186	0.176728		0.947872	0.656908	0.939202	0.952555	0.127234	0.0147708		0.965216	0.0470469	0.0469117	0.962133	0.0145298	0.0452523
1.1793	1.05434	0.60853	1.06174	1.06168	0.0747657	0.177667		0.946978	0.656238	0.938533	0.951555	0.127678	0.015215		0.965691	0.046844	0.0465736	0.962734	0.0144442	0.0452523
1.1803	1.05328	0.608795	1.06061	1.06143	0.0751363	0.178458		0.946681	0.656908	0.938197	0.951	0.126235	0.0146599		0.965148	0.0470469	0.0467088	0.964102	0.0145298	0.0452523
1.1813	1.05243	0.608795	1.05969	1.06153	0.0747656	0.177123		0.94683	0.658023	0.938421	0.951223	0.12468	0.0148819		0.965623	0.0467764	0.0467764	0.964102	0.0142731	0.0454234
1.1823	1.05333	0.608477	1.06033	1.06177	0.0740656	0.175789		0.94802	0.658023	0.939202	0.951445	0.124902	0.0143268		0.965216	0.0469117	0.0466412	0.963414	0.0141875	0.0455945
1.1833	1.05375	0.608795	1.06082	1.06276	0.0736126	0.175938		0.948615	0.658359	0.939314	0.950668	0.126568	0.0145488		0.96434	0.0469117	0.0467764	0.962391	0.0143587	0.0455945
1.1843	1.05359	0.608689	1.06103	1.06276	0.0729537	0.175838		0.949211	0.657689	0.939425	0.950446	0.128122	0.0142157		0.963796	0.0471822	0.0470469	0.962133	0.0144442	0.0450811
1.1853	1.05312	0.608795	1.06054	1.06153	0.0734891	0.175986		0.948765	0.656796	0.939202	0.950112	0.130453	0.0154369		0.964679	0.0469117	0.0467764	0.962047	0.0146154	0.0447388
1.1863	1.05232	0.608742	1.05948	1.06143	0.0743538	0.176629		0.949063	0.656238	0.940431	0.950668	0.12901	0.0154369		0.964944	0.0467764	0.0466412	0.960422	0.0145298	0.0449099
1.1873	1.05227	0.607417	1.05976	1.06168	0.0744774	0.176332		0.948913	0.657242	0.941435	0.950668	0.128455	0.0152149		0.964815	0.0468441	0.046506	0.959391	0.0147866	0.0449955
1.1883	1.05301	0.606675	1.06068	1.06138	0.0739009	0.17653		0.949658	0.658582	0.941769	0.950446	0.132119	0.0146599		0.964475	0.0471145	0.0469793	0.95982	0.0152145	0.0449955
1.1893	1.05397	0.606463	1.06174	1.06168	0.0737362	0.176629		0.9507	0.6578	0.942105	0.949669	0.136559	0.0147708		0.964272	0.0470469	0.0469793	0.959648	0.0147866	0.0445676
1.1903	1.0546	0.605721	1.06223	1.06237	0.073242	0.175888		0.951145	0.656908	0.942327	0.948336	0.130898	0.0143268		0.964	0.0471821	0.0469793	0.961359	0.0147866	0.0446532
1.1913	1.05486	0.605297	1.06252	1.06271	0.0725008	0.174949		0.951444	0.656238	0.942552	0.948558	0.12679	0.0133276		0.963056	0.0475878	0.0472498	0.962219	0.0146154	0.044482
1.1923	1.05466	0.605137	1.06188	1.06286	0.0715947	0.174257		0.951742	0.655121	0.942439	0.949891	0.126457	0.0124394		0.962988	0.047385	0.0473173	0.962219	0.0149577	0.0449099
1.1933	1.0546	0.605933	1.06167	1.06197	0.0721714	0.174059		0.952039	0.655568	0.942774	0.951223	0.127567	0.0126615		0.963327	0.0473173	0.0472498	0.96282	0.0149577	0.0454234
1.1943	1.05561	0.606622	1.06266	1.06162	0.0721713	0.174059		0.952187	0.656238	0.942327	0.952777	0.129787	0.0125504		0.962784	0.047385	0.0471145	0.963414	0.0149577	0.045509
1.1953	1.05603	0.607257	1.06287	1.06158	0.0722948	0.174553		0.95055	0.657577	0.940876	0.954109	0.130786	0.0132165		0.962512	0.0472498	0.0468441	0.964102	0.0149577	0.0453378
1.1963	1.05545	0.608	1.06266	1.06098	0.0717183	0.17569		0.949211	0.658023	0.940095	0.954331	0.13112	0.0134386		0.962716	0.0470469	0.0467764	0.9635	0.0148721	0.0455945
1.1973	1.05486	0.608477	1.06223	1.06064	0.0718419	0.17658		0.94802	0.65914	0.939314	0.954664	0.130786	0.0127725		0.962988	0.0471145	0.0469793	0.962477	0.014701	0.0454234
1.1983	1.05439	0.60747	1.06174	1.06068	0.0727478	0.176728		0.947276	0.66048	0.938755	0.953999	0.128122	0.0124394		0.963728	0.0471821	0.0469117	0.961617	0.0146154	0.0456802
1.1993	1.05375	0.606197	1.06125	1.06014	0.0740656	0.176283		0.947425	0.65914	0.938867	0.953665	0.124125	0.0124394		0.964272	0.0471821	0.0469117	0.961531	0.0146154	0.0455945
1.2003	1.05375	0.606675	1.06132	1.06029	0.073695	0.175592		0.947276	0.6578	0.938644	0.952443	0.12679	0.0126614		0.964543	0.0471145	0.0469117	0.961703	0.0145298	0.0455945
1.2013	1.0537	0.607417	1.06117	1.06093	0.0727067	0.174801		0.94802	0.657242	0.939202	0.951777	0.12901	0.0137716		0.964679	0.0469117	0.046844	0.960852	0.0145298	0.0456802
1.2023	1.05296	0.607417	1.06054	1.06118	0.0725008	0.174751		0.947573	0.656238	0.938867	0.950112	0.129454	0.0134386		0.96508	0.0469117	0.0465736	0.960766	0.0146154	0.045509
1.2033	1.05237	0.607152	1.0599	1.06197	0.073942	0.173961		0.948467	0.655234	0.939314	0.949224	0.130231	0.0133276		0.965352	0.0469117	0.046506	0.959391	0.014701	0.045509
1.2043	1.05264	0.607046	1.0604	1.06252	0.0745598	0.173318		0.94936	0.653781	0.939649	0.950112	0.130898	0.0132166		0.965691	0.0469117	0.0468441	0.958711	0.0146154	0.0454234
1.2053	1.05317	0.606463	1.06096	1.06316	0.0737774	0.173862		0.949211	0.653447	0.939537	0.951445	0.131897	0.0132165		0.96542	0.0471145	0.0469117	0.959477	0.0148721	0.0454234
1.2063	1.05359	0.606515	1.06139	1.06256	0.0736126	0.174405		0.949063	0.654675	0.939314	0.950335	0.130454	0.0144378		0.96434	0.0474526	0.0470469	0.96068	0.0145298	0.0453378
1.2073	1.05365	0.606092	1.06139	1.06168	0.0741068	0.174159		0.94817	0.65501	0.938421	0.950112	0.129454	0.0147708		0.963457	0.0475878	0.0473173	0.960422	0.014701	0.045509
1.2083	1.05402	0.605933	1.06174	1.06059	0.0740244	0.174059		0.947872	0.654898	0.93831	0.94978	0.128455	0.0146599		0.963525	0.0475878	0.0474526	0.959734	0.014701	0.0451666
1.2093	1.05365	0.60641	1.06132	1.06024	0.0736126	0.17401		0.947425	0.655345	0.938197	0.950001	0.126901	0.0141047		0.963932	0.0475878	0.0474526	0.96068	0.0150433	0.0451666
1.2103	1.0527	0.606886	1.0604	1.06014	0.0743126	0.174702		0.94817	0.653894	0.939314	0.950557	0.127123	0.0136607		0.964611	0.0475878	0.0471822	0.961703	0.0152145	0.0452523
1.2113	1.05254	0.60641	1.05976	1.05999	0.0758361	0.175344		0.948765	0.654228	0.939649	0.950889	0.128455	0.0147708		0.966099	0.0476554	0.0473173	0.962477	0.014701	0.0452523
1.2123	1.05211	0.606092	1.05926	1.06009	0.0764955	0.175592		0.949658	0.655121	0.940765	0.950889	0.130676	0.0149928		0.966907	0.0476554	0.0475202	0.963586	0.0150433	0.0453378
1.2133	1.05206	0.606515	1.0599	1.06034	0.0768662	0.176135		0.948765	0.657019	0.940542	0.951334	0.130009	0.0144378		0.966704	0.0477231	0.0475202	0.961617	0.0149577	0.0451666
1.2143	1.05264	0.607735	1.06061	1.06103	0.0754654	0.176234		0.949955	0.658693	0.940988	0.951445	0.129454	0.0152149		0.966364	0.0476554	0.0474526	0.958797	0.0149577	0.0450811
1.2153	1.05291	0.607841	1.06103	1.06083	0.0738596	0.176135		0.950105	0.658917	0.940765	0.950668	0.128899	0.015437		0.966302	0.0474526	0.0473173	0.957086	0.0148722	0.0451666
1.2163	1.05296	0.607257	1.06132	1.06064	0.0720889	0.17574		0.947276	0.659251	0.938755	0.950557	0.128899	0.0149928		0.965895	0.0472498	0.0471821	0.955375	0.0151289	0.0451666
1.2173	1.05306	0.607046	1.0611	1.06133	0.0708947	0.175888		0.946383	0.657353	0.937529	0.950889	0.128899	0.0145488		0.965216	0.0471821	0.0470469	0.956227	0.0149577	0.0451666
1.2183	1.05428	0.606357	1.06223	1.06143	0.0699476	0.176777		0.946978	0.654564	0.937974	0.951112	0.131231	0.0144378		0.96434	0.0469793	0.0467764	0.958539	0.014701	0.0449955
1.2193	1.05514	0.606304	1.06315	1.06143	0.0699888	0.176777		0.94817	0.654005	0.939202	0.950557	0.133784	0.0142157		0.963728	0.0471145	0.0467088	0.960078	0.0151289	0.0452523
1.2203	1.05534	0.607257	1.0628	1.06123	0.0697417	0.175888		0.949063	0.655904	0.939984	0.950889	0.13978	0.0143268		0.963259	0.0470469	0.046844	0.961531	0.0150433	0.0450811
1.2213	1.05497	0.607894	1.06195	1.06083	0.0708535	0.17485		0.949063	0.658023	0.939984	0.950112	0.146884	0.0149928		0.963389	0.0469793	0.0468441	0.960852	0.0148722	0.0453378
1.2223	1.0546	0.607682	1.06181	1.06044	0.0736127	0.174505		0.949211	0.658247	0.939649	0.950112	0.144553	0.0162141		0.964543	0.0472498	0.0469793	0.959992	0.014701	0.0452523
1.2233	1.0545	0.606993	1.06181	1.05989	0.0759602	0.175246		0.948615	0.658582	0.939425	0.949446	0.141555	0.015437		0.965963	0.0475202	0.0470469	0.959648	0.0147866	0.0451666
1.2243	1.0546	0.606357	1.0621	1.05989	0.0772368	0.174751		0.94802	0.657689	0.939091	0.94978	0.137781	0.0151039		0.966975	0.0473173	0.0470469	0.958969	0.0150433	0.0449955
1.2253	1.05471	0.605826	1.06245	1.06039	0.0770308	0.175048		0.947425	0.657242	0.938867	0.94978	0.136449	0.0145488		0.966568	0.0473173	0.0471145	0.958797	0.0151289	0.0450811
1.2263	1.0545	0.606145	1.0623	1.06014	0.0770714	0.175542		0.946383	0.65713	0.937863	0.950668	0.132674	0.0146599		0.965012	0.0473173	0.0469117	0.959141	0.0147866	0.0451666
1.2273	1.05423	0.607152	1.0616	1.05945	0.0772774	0.175097		0.945193	0.656796	0.9363	0.950668	0.131009	0.0148819		0.963796	0.0469793	0.0468441	0.958969	0.0148721	0.0454234
1.2283	1.05434	0.608583	1.06174	1.0593	0.0761662	0.174356		0.9443	0.654675	0.935519	0.950668	0.131453	0.0152149		0.964	0.0468441	0.0465736	0.958883	0.0150433	0.0452523
1.2293	1.0545	0.608371	1.06139	1.05999	0.0757955	0.174356		0.945043	0.653336	0.935965	0.950557	0.133118	0.0156591		0.964204	0.0466412	0.0464383	0.957766	0.0150433	0.0449099
1.2303	1.05445	0.607788	1.06117	1.06049	0.073695	0.17485		0.94549	0.653558	0.936859	0.951	0.131675	0.0163251		0.964272	0.0466412	0.0464383	0.955969	0.0150433	0.0449099
1.2313	1.05402	0.607788	1.06089	1.06064	0.0726243	0.175394		0.946235	0.65434	0.93764	0.950334	0.126346	0.0156589		0.964611	0.0469117	0.0465736	0.955969	0.0149577	0.0448244
1.2323	1.05434	0.607523	1.06082	1.06089	0.0720889	0.176135		0.946533	0.653894	0.937304	0.949669	0.126235	0.0133276		0.964944	0.046844	0.0467088	0.95768	0.0148721	0.0449099
1.2333	1.05455	0.607523	1.06174	1.06138	0.0720065	0.175888		0.946383	0.654117	0.93764	0.949557	0.127678	0.0128835		0.964679	0.0467088	0.0467088	0.959391	0.0147866	0.045509
1.2343	1.05466	0.607841	1.06181	1.06168	0.0714301	0.175295		0.946235	0.655679	0.937529	0.949003	0.129898	0.0136607		0.96434	0.0469793	0.0468441	0.959219	0.0143587	0.0454234
1.2353	1.05455	0.608265	1.06174	1.06183	0.0706888	0.174702		0.94549	0.655568	0.936746	0.949891	0.129121	0.015215		0.964475	0.0472498	0.0468441	0.96025	0.0144442	0.0452523
1.2363	1.05445	0.608424	1.06181	1.06262	0.0698241	0.174801		0.944448	0.656015	0.935519	0.94978	0.128566	0.0145488		0.964815	0.0472498	0.0469793	0.961875	0.014701	0.0451666
1.2373	1.05466	0.607841	1.06188	1.06276	0.0697005	0.175492		0.944746	0.654898	0.93563	0.949669	0.128122	0.0142157		0.964877	0.0467088	0.0467088	0.963586	0.0146154	0.0452523
1.2383	1.0545	0.607364	1.06203	1.06227	0.0709771	0.175938		0.945193	0.65367	0.936523	0.950778	0.127123	0.0142158		0.964944	0.0467764	0.0465736	0.964867	0.0145298	0.0453378
1.2393	1.05455	0.607788	1.0616	1.06266	0.0724595	0.175592		0.94549	0.653336	0.937304	0.950112	0.127789	0.0156591		0.963932	0.0468441	0.0467088	0.964781	0.014701	0.0449955
1.2403	1.05418	0.608583	1.06153	1.06266	0.0740244	0.174801		0.945193	0.651773	0.936523	0.949335	0.127012	0.0152149		0.963864	0.0471145	0.0467088	0.964617	0.0153	0.0446532
1.2413	1.05418	0.608583	1.06167	1.06296	0.0749304	0.174553		0.944746	0.65088	0.936412	0.950001	0.127567	0.0151039		0.964136	0.0470469	0.046844	0.964531	0.0147866	0.0446532
1.2423	1.05418	0.608848	1.0623	1.0638	0.0744362	0.17401		0.946383	0.650992	0.938197	0.950889	0.130342	0.0143268		0.96508	0.0469793	0.0466412	0.963672	0.0146154	0.044482
1.2433	1.0545	0.608795	1.06252	1.06385	0.0742304	0.174257		0.94683	0.652666	0.93831	0.952222	0.130453	0.0145488		0.965759	0.0469117	0.0467764	0.963328	0.0146154	0.0449955
1.2443	1.05486	0.607629	1.06266	1.0636	0.0744774	0.174998		0.946681	0.654675	0.938533	0.951666	0.130342	0.0139936		0.96542	0.0471821	0.0469793	0.962477	0.014701	0.045509
1.2453	1.05519	0.606622	1.06308	1.06316	0.0746421	0.176135		0.946235	0.655234	0.937751	0.950557	0.130342	0.0144378		0.965488	0.0472498	0.0469117	0.963672	0.0147866	0.0454234
1.2463	1.05519	0.607046	1.06315	1.06222	0.0748068	0.176382		0.946086	0.656461	0.937416	0.950223	0.130009	0.015992		0.966099	0.0469793	0.0469117	0.964867	0.0145298	0.0453378
1.2473	1.05514	0.608053	1.06337	1.06222	0.0741068	0.176629		0.946978	0.655791	0.937529	0.951555	0.130342	0.01577		0.96542	0.0470469	0.0467764	0.963586	0.0147866	0.0457657
1.2483	1.05492	0.60906	1.06294	1.06241	0.0738185	0.176432		0.947425	0.653447	0.937751	0.952111	0.13012	0.0154369		0.96508	0.0469793	0.0467764	0.96307	0.014701	0.0452523
1.2493	1.05428	0.609219	1.06195	1.06192	0.0731596	0.176283		0.947128	0.653447	0.937529	0.952777	0.128233	0.0156591		0.965012	0.0471822	0.0467764	0.962133	0.0146154	0.0453378
1.2503	1.05323	0.609006	1.06096	1.06158	0.0735714	0.176332		0.945639	0.654228	0.936412	0.952	0.125791	0.0152149		0.965759	0.0470469	0.0467088	0.962047	0.0143587	0.0451666
1.2513	1.05254	0.608424	1.05969	1.06168	0.0741891	0.177222		0.944598	0.654451	0.934961	0.951223	0.122904	0.0152149		0.966568	0.0467764	0.0466412	0.962305	0.0144442	0.0453378
1.2523	1.05227	0.607257	1.05899	1.06143	0.0732008	0.17658		0.9443	0.654117	0.934626	0.949891	0.121794	0.0151039		0.967179	0.0467088	0.0463707	0.962898	0.0141875	0.0450811
1.2533	1.05254	0.606622	1.05919	1.06118	0.0712653	0.176036		0.944598	0.655679	0.934961	0.949335	0.123126	0.0135496		0.96684	0.0465736	0.046506	0.964359	0.0145298	0.0449955
1.2543	1.05323	0.606622	1.05997	1.06153	0.0708124	0.175443		0.945639	0.654005	0.935965	0.949335	0.125569	0.0135496		0.965827	0.0467088	0.0466412	0.965469	0.0149577	0.0455945
1.2553	1.05386	0.606145	1.06096	1.06227	0.0703594	0.175097		0.946533	0.651438	0.937304	0.949557	0.125791	0.0137716		0.96542	0.0467764	0.0466412	0.963758	0.0148721	0.0453378
1.2563	1.05317	0.606092	1.06026	1.06232	0.0715124	0.174257		0.946235	0.651326	0.937416	0.949003	0.126346	0.0138827		0.964944	0.0471145	0.0469793	0.961445	0.0147866	0.0451666
1.2573	1.05312	0.607205	1.0599	1.06192	0.0722125	0.173516		0.945788	0.651438	0.937529	0.949446	0.127123	0.0139936		0.96508	0.0471145	0.0469793	0.959992	0.0148721	0.0453378
1.2583	1.05381	0.607894	1.06033	1.06168	0.0726243	0.174801		0.946086	0.653558	0.937193	0.950334	0.128566	0.0139936		0.965012	0.0471822	0.0470469	0.960594	0.0147866	0.0453378
1.2593	1.05455	0.608689	1.06068	1.06172	0.0731184	0.176332		0.94549	0.654675	0.93764	0.950668	0.130009	0.0141047		0.96542	0.0471821	0.0470469	0.961875	0.0148721	0.0449099
1.2603	1.0545	0.609113	1.06061	1.06123	0.0744362	0.177371		0.945788	0.654564	0.937529	0.950112	0.12679	0.0139936		0.965759	0.0471145	0.0466412	0.962562	0.0149577	0.0448244
1.2613	1.05428	0.609113	1.06075	1.06098	0.0751363	0.176926		0.945788	0.653447	0.936859	0.949114	0.125458	0.0138827		0.965284	0.0467764	0.0467088	0.961961	0.0152145	0.0449955
1.2623	1.05386	0.608795	1.0604	1.06014	0.0747656	0.175938		0.946533	0.650656	0.937082	0.950223	0.125791	0.0147708		0.966031	0.0469117	0.0468441	0.959906	0.0149577	0.0449955
1.2633	1.05375	0.607682	1.06033	1.06009	0.0741892	0.175048		0.94802	0.647643	0.93831	0.950223	0.128455	0.0145488		0.967043	0.0471145	0.0467764	0.958797	0.0144442	0.0447388
1.2643	1.0545	0.606939	1.06125	1.06064	0.0744362	0.174603		0.948765	0.647865	0.938867	0.949335	0.12901	0.0144377		0.967315	0.0470469	0.046844	0.959391	0.0148721	0.0451666
1.2653	1.05524	0.607046	1.06245	1.06138	0.0744774	0.175048		0.947723	0.649652	0.938533	0.948226	0.129454	0.0144378		0.966235	0.0468441	0.046506	0.960594	0.0153856	0.0449955
1.2663	1.05577	0.607152	1.06323	1.06103	0.0743127	0.175147		0.94802	0.651996	0.938421	0.948114	0.129787	0.0139936		0.965827	0.0468441	0.0465736	0.96307	0.0151289	0.0450811
1.2673	1.05561	0.606781	1.06315	1.06148	0.0737362	0.175147		0.947723	0.651996	0.938867	0.948336	0.131786	0.0136607		0.965488	0.0468441	0.0466412	0.962562	0.014701	0.0452523
1.2683	1.05519	0.606939	1.06223	1.06183	0.0735714	0.175246		0.947575	0.652554	0.938755	0.94878	0.13334	0.014993		0.964611	0.0469793	0.0467764	0.962562	0.0146154	0.0452523
1.2693	1.05439	0.606622	1.06188	1.06172	0.0736538	0.174405		0.946533	0.653113	0.93831	0.949003	0.133229	0.0156589		0.96434	0.0469117	0.0466412	0.960938	0.0145298	0.0456802
1.2703	1.05428	0.606728	1.06203	1.06108	0.0730361	0.174257		0.94683	0.654451	0.938086	0.94978	0.130453	0.0151039		0.964747	0.0468441	0.0467088	0.959477	0.0144442	0.045509
1.2713	1.05445	0.606728	1.06203	1.06162	0.0737774	0.173862		0.946978	0.655902	0.937974	0.949891	0.134228	0.0151039		0.965352	0.0468441	0.0465736	0.961023	0.0139308	0.045509
1.2723	1.05418	0.606728	1.06181	1.06192	0.0741068	0.174208		0.947128	0.65713	0.937974	0.948669	0.137004	0.0149928		0.965963	0.0468441	0.0467088	0.961531	0.0143587	0.0454234
1.2733	1.05344	0.60641	1.0611	1.06138	0.0737362	0.175196		0.947425	0.657689	0.937863	0.947447	0.134561	0.0146599		0.966704	0.0469117	0.0467088	0.960766	0.0146154	0.0455945
1.2743	1.0528	0.606886	1.05997	1.06078	0.072789	0.175789		0.947573	0.658023	0.937529	0.94767	0.132563	0.0148819		0.966636	0.0469793	0.0467764	0.961102	0.014701	0.0454234
1.2753	1.05216	0.606834	1.05941	1.06172	0.0726655	0.176432		0.94683	0.658247	0.937193	0.948891	0.13223	0.0154369		0.967111	0.0471145	0.0470469	0.963328	0.0148721	0.045509
1.2763	1.05237	0.60641	1.05976	1.06192	0.0730773	0.175986		0.945937	0.656796	0.936635	0.950446	0.131564	0.0151039		0.967852	0.0469793	0.0467764	0.966414	0.0147866	0.0456802
1.2773	1.0527	0.605826	1.0599	1.06118	0.0733244	0.175147		0.944746	0.65434	0.935519	0.950001	0.13112	0.0133276		0.967988	0.0469117	0.0467088	0.966664	0.0150433	0.0457657
1.2783	1.05317	0.605244	1.06019	1.06103	0.0734479	0.174702		0.94549	0.650992	0.93563	0.949335	0.128455	0.0128835		0.967722	0.0470469	0.0469793	0.965727	0.0147866	0.045509
1.2793	1.05317	0.605297	1.0604	1.06143	0.0731185	0.174899		0.946383	0.650433	0.937193	0.948226	0.126124	0.0137716		0.966704	0.0469793	0.0467764	0.965039	0.0147866	0.0454234
1.2803	1.05285	0.605508	1.05983	1.06103	0.0733656	0.175097		0.946533	0.652889	0.93764	0.949003	0.124791	0.0135496		0.964679	0.046844	0.0466412	0.964781	0.0145298	0.0454234
1.2813	1.05259	0.605986	1.05948	1.06089	0.0728714	0.176135		0.946681	0.655904	0.937082	0.948226	0.124347	0.0147708		0.962037	0.0470469	0.0467764	0.964359	0.0143587	0.0452523
1.2823	1.05264	0.606515	1.0599	1.06093	0.0719655	0.176432		0.946086	0.658359	0.93697	0.948336	0.122682	0.0154369		0.960957	0.0469117	0.0467088	0.964703	0.0145298	0.0450811
1.2833	1.05296	0.606568	1.05997	1.06093	0.0720066	0.17658		0.945788	0.660257	0.937082	0.948336	0.124791	0.0154369		0.961364	0.0468441	0.0466412	0.964703	0.0148721	0.0452523
1.2843	1.05301	0.606304	1.06026	1.06192	0.0707711	0.176332		0.946086	0.663048	0.937529	0.948669	0.126901	0.0148819		0.96184	0.0469793	0.0466412	0.962477	0.0151289	0.0452523
1.2853	1.05328	0.606515	1.06075	1.06177	0.071183	0.175838		0.946681	0.663605	0.93831	0.948558	0.129676	0.0151039		0.962444	0.0469117	0.0465736	0.962133	0.0150433	0.0453378
1.2863	1.05375	0.606781	1.06103	1.06143	0.0728302	0.175592		0.945788	0.661931	0.937863	0.947559	0.131231	0.0152149		0.962784	0.0470469	0.0467088	0.961961	0.0148721	0.0452523
1.2873	1.05392	0.606622	1.06153	1.06128	0.0747244	0.174899		0.94683	0.65914	0.938755	0.947226	0.132452	0.0137716		0.96258	0.0471145	0.0470469	0.96307	0.0147866	0.045509
1.2883	1.05439	0.60625	1.0623	1.06153	0.0756714	0.174751		0.947425	0.656015	0.938755	0.947559	0.135116	0.0135496		0.962784	0.0472498	0.0469793	0.9635	0.0147866	0.045509
1.2893	1.0545	0.605986	1.06259	1.06148	0.0751775	0.175196		0.94683	0.653558	0.93831	0.94878	0.137781	0.0131055		0.963327	0.0470469	0.0469793	0.962477	0.0149577	0.0456802
1.2903	1.0545	0.605085	1.06245	1.06177	0.0739421	0.176086		0.945937	0.650768	0.937416	0.950112	0.140445	0.0134386		0.963327	0.0469793	0.0467764	0.962477	0.014701	0.0455945
1.2913	1.05455	0.605508	1.06203	1.06252	0.0737774	0.176086		0.94549	0.650992	0.936635	0.950889	0.142666	0.0136607		0.963457	0.0470469	0.0469793	0.961875	0.0144442	0.0457657
1.2923	1.05428	0.605721	1.06153	1.06222	0.074395	0.175443		0.946086	0.653113	0.937304	0.950889	0.142888	0.0135496		0.96366	0.0473173	0.0468441	0.961445	0.0141875	0.0450811
1.2933	1.05418	0.606357	1.06146	1.06114	0.0749716	0.175246		0.946383	0.655902	0.937751	0.950112	0.141777	0.0137716		0.964543	0.0471145	0.046844	0.959141	0.0145298	0.0452523
1.2943	1.05471	0.606515	1.06195	1.06103	0.0738185	0.175641		0.946235	0.657019	0.937529	0.948669	0.140112	0.0141047		0.964679	0.0469117	0.046844	0.957	0.0147866	0.0454234
1.2953	1.05407	0.606939	1.06195	1.06183	0.072542	0.175986		0.945937	0.6578	0.937529	0.948226	0.137447	0.0158809		0.964747	0.0472498	0.0469793	0.957086	0.0150433	0.0456802
1.2963	1.05407	0.606781	1.06146	1.06187	0.0728714	0.175986		0.945788	0.658582	0.936859	0.947892	0.134672	0.0163251		0.964272	0.0471821	0.0471821	0.959219	0.0149577	0.045509
1.2973	1.0545	0.606939	1.0616	1.06172	0.0734067	0.175938		0.946086	0.658023	0.93697	0.947559	0.132785	0.0154369		0.964815	0.0472498	0.0469793	0.960422	0.0149577	0.0456802
1.2983	1.05455	0.607257	1.06216	1.06123	0.073695	0.175147		0.945937	0.658023	0.936747	0.94767	0.129343	0.0153259		0.966031	0.0469793	0.0467088	0.961273	0.0147866	0.0457657
1.2993	1.05434	0.606886	1.06174	1.06128	0.0728714	0.175246		0.945937	0.656572	0.936747	0.947559	0.126235	0.0146599		0.967315	0.0472498	0.0469117	0.961531	0.0147866	0.045509
1.3003	1.05434	0.60535	1.06195	1.06093	0.0720478	0.17574		0.946235	0.653336	0.937082	0.948003	0.124902	0.0152149		0.967451	0.047385	0.0470469	0.961102	0.0152145	0.0453378
1.3013	1.05445	0.604554	1.06195	1.05985	0.0719654	0.176036		0.945788	0.651438	0.936859	0.94878	0.123792	0.0152149		0.966364	0.0470469	0.0469117	0.961016	0.0152145	0.0454234
1.3023	1.05407	0.60519	1.0621	1.05995	0.0727889	0.175641		0.945043	0.650211	0.936189	0.949003	0.122571	0.0145488		0.964679	0.0469793	0.0468441	0.961617	0.0150433	0.0451666
1.3033	1.05445	0.605297	1.06203	1.06044	0.0738185	0.175492		0.944895	0.648312	0.936189	0.948003	0.124236	0.0138827		0.96366	0.0471821	0.0468441	0.961875	0.0149577	0.0452523
1.3043	1.05418	0.605297	1.06153	1.06162	0.0740244	0.175838		0.946086	0.648535	0.936746	0.948226	0.125902	0.0138827		0.963796	0.0469793	0.0467088	0.962305	0.0149577	0.0452523
1.3053	1.05365	0.604979	1.06117	1.06222	0.0740656	0.175938		0.946533	0.65088	0.937304	0.948447	0.127789	0.0142157		0.963932	0.0471145	0.0467088	0.962047	0.0149577	0.0450811
1.3063	1.0537	0.60519	1.0611	1.06232	0.0731185	0.175492		0.946533	0.652219	0.937863	0.947226	0.127456	0.0141047		0.963525	0.0467764	0.0467764	0.96025	0.0147866	0.0449099
1.3073	1.0545	0.605561	1.06181	1.06183	0.0721301	0.174998		0.94683	0.651996	0.937974	0.947004	0.126568	0.0139936		0.964	0.0469117	0.0468441	0.959906	0.0149577	0.0451666
1.3083	1.05471	0.60641	1.06195	1.06148	0.0713477	0.174801		0.946978	0.650992	0.93764	0.946449	0.126124	0.0142158		0.963864	0.0471145	0.0468441	0.960938	0.0145298	0.0450811
1.3093	1.05471	0.606939	1.06203	1.06172	0.0711418	0.175542		0.946533	0.652443	0.936859	0.947004	0.128455	0.0138827		0.963525	0.0470469	0.0469793	0.960938	0.014701	0.0456802
1.3103	1.05492	0.60747	1.06245	1.06202	0.0717183	0.175542		0.945639	0.652889	0.9363	0.947781	0.127456	0.0127725		0.964204	0.0469793	0.0469793	0.96025	0.0144443	0.0456802
1.3113	1.05486	0.608795	1.0623	1.06227	0.0711418	0.175838		0.945639	0.654005	0.935965	0.948558	0.127012	0.0125504		0.965963	0.0470469	0.0465736	0.959906	0.0145298	0.0455945
1.3123	1.05428	0.609006	1.0621	1.06256	0.0710595	0.17569		0.944151	0.655791	0.935519	0.948114	0.128899	0.0121063		0.966235	0.0469793	0.0467764	0.959477	0.014701	0.0456802
1.3133	1.05375	0.607946	1.06139	1.06241	0.0708535	0.175641		0.944448	0.656238	0.93563	0.947226	0.131009	0.0125504		0.965488	0.0469117	0.0467764	0.961273	0.0143587	0.0453378
1.3143	1.05354	0.606781	1.06139	1.06237	0.0724596	0.175789		0.946086	0.654451	0.936189	0.947892	0.132341	0.0134386		0.96434	0.0467764	0.0466412	0.964703	0.0146154	0.0454234
1.3153	1.05328	0.606463	1.06139	1.06217	0.0740656	0.175147		0.946383	0.653447	0.93764	0.949003	0.130898	0.0136607		0.964	0.0467088	0.046506	0.966586	0.0144443	0.0455945
1.3163	1.05392	0.606622	1.0616	1.06222	0.0742715	0.174159		0.94683	0.654787	0.93831	0.950112	0.130564	0.0147708		0.964407	0.0468441	0.0466412	0.967867	0.0146154	0.0451666
1.3173	1.0545	0.607205	1.0616	1.06207	0.0732832	0.173911		0.945193	0.654117	0.936189	0.949003	0.130009	0.0151039		0.965488	0.0468441	0.0465736	0.967781	0.0147866	0.0454234
1.3183	1.05466	0.606886	1.06132	1.06138	0.0724595	0.17317		0.943704	0.653224	0.934849	0.948669	0.130564	0.0161031		0.966432	0.0467764	0.0467088	0.966242	0.0144442	0.0452523
1.3193	1.05407	0.606092	1.06125	1.06089	0.0724595	0.17312		0.943556	0.653558	0.934626	0.948669	0.132341	0.0161031		0.965895	0.0469117	0.0466412	0.962648	0.0144442	0.0454234
1.3203	1.0537	0.60519	1.06139	1.06158	0.0731596	0.173615		0.944151	0.653558	0.934179	0.947892	0.132008	0.0158811		0.964679	0.0468441	0.046506	0.960422	0.014701	0.0451666
1.3213	1.05306	0.604554	1.0611	1.06138	0.0738597	0.174059		0.944151	0.653224	0.934068	0.947004	0.128455	0.0151039		0.963932	0.0468441	0.0467088	0.961531	0.014701	0.0451666
1.3223	1.05285	0.605297	1.06026	1.06118	0.0760421	0.174505		0.943109	0.654564	0.933732	0.946338	0.127789	0.0153259		0.964679	0.0471145	0.0469793	0.962734	0.0146154	0.0450811
1.3233	1.05227	0.606463	1.05969	1.06089	0.0783895	0.174949		0.943556	0.656572	0.934402	0.945672	0.12679	0.0152149		0.96508	0.0471822	0.0470469	0.963242	0.0147866	0.0450811
1.3243	1.05264	0.607205	1.06054	1.06093	0.0790895	0.175344		0.943853	0.658582	0.934291	0.945116	0.125902	0.0144377		0.965148	0.0472498	0.0469793	0.962391	0.0145298	0.0449955
1.3253	1.05323	0.608212	1.06146	1.06083	0.0783075	0.176678		0.943853	0.658804	0.934179	0.946782	0.127234	0.0144378		0.964877	0.0472498	0.0469793	0.961445	0.0147866	0.0451666
1.3263	1.05375	0.607788	1.06146	1.06049	0.0761662	0.176926		0.943406	0.658136	0.934179	0.947781	0.12679	0.0146599		0.964815	0.0472498	0.0469117	0.95982	0.0147866	0.0449955
1.3273	1.05412	0.607523	1.06174	1.06024	0.0749304	0.177173		0.942811	0.656572	0.934514	0.947781	0.1279	0.0143268		0.965556	0.0471145	0.0467764	0.959305	0.0145298	0.0452523
1.3283	1.05381	0.607523	1.06174	1.06108	0.074848	0.176827		0.943406	0.656908	0.935072	0.948114	0.124791	0.0142158		0.966364	0.0470469	0.0467764	0.96025	0.0145298	0.0450811
1.3293	1.0537	0.606886	1.06174	1.06138	0.0749716	0.17653		0.942663	0.65713	0.934849	0.948003	0.122571	0.0137716		0.967247	0.0471821	0.0469117	0.962477	0.0150433	0.0445677
1.3303	1.05407	0.607628	1.06195	1.06083	0.0739422	0.176432		0.942365	0.656126	0.93351	0.946559	0.12135	0.0139936		0.967383	0.0470469	0.0469793	0.964187	0.0150433	0.0450811
1.3313	1.05407	0.608106	1.06216	1.06049	0.0734891	0.175986		0.942216	0.65501	0.93351	0.945339	0.117797	0.0141047		0.967315	0.0470469	0.0467764	0.964445	0.0153	0.0453378
1.3323	1.05423	0.607894	1.06223	1.06044	0.0743127	0.175295		0.942663	0.654117	0.933621	0.945893	0.118574	0.0148819		0.966975	0.0469117	0.0466412	0.964867	0.014701	0.0449955
1.3333	1.0537	0.607735	1.06146	1.06098	0.0751363	0.175592		0.941471	0.655121	0.933398	0.946449	0.121461	0.0145488		0.965759	0.0469117	0.0467088	0.965125	0.0148721	0.0449955
1.3343	1.05354	0.607417	1.06103	1.06128	0.0761662	0.175641		0.942514	0.655121	0.934179	0.946004	0.124014	0.0132166		0.964747	0.0469117	0.0468441	0.965812	0.0146154	0.0450811
1.3353	1.05402	0.607046	1.06146	1.06183	0.0764128	0.175394		0.943853	0.654787	0.935295	0.946782	0.126124	0.0132166		0.964747	0.0472498	0.0467764	0.965641	0.0144443	0.0452523
1.3363	1.05497	0.607417	1.06237	1.06158	0.0766602	0.174801		0.944151	0.65367	0.935295	0.947115	0.128233	0.0135496		0.964407	0.0470469	0.0469117	0.962984	0.0146154	0.0453378
1.3373	1.05529	0.607841	1.06287	1.06143	0.0769481	0.174356		0.944151	0.652777	0.935183	0.947004	0.13012	0.0137716		0.965012	0.0472498	0.0472498	0.960594	0.0146154	0.0453378
1.3383	1.05545	0.608053	1.0628	1.06118	0.0762481	0.174307		0.945639	0.652666	0.935519	0.946449	0.132341	0.0144377		0.966099	0.0475202	0.0472498	0.959562	0.0143587	0.045509
1.3393	1.05486	0.607894	1.06203	1.06108	0.0750539	0.174109		0.945043	0.654005	0.936077	0.94667	0.134561	0.0146599		0.967315	0.047385	0.0473173	0.958625	0.0145298	0.0456802
1.3403	1.05455	0.607628	1.06167	1.06202	0.0742303	0.173911		0.943853	0.655345	0.935183	0.947336	0.134894	0.015437		0.967179	0.047385	0.0470469	0.958883	0.0146154	0.046108
1.3413	1.05434	0.607257	1.06132	1.06252	0.0734067	0.174307		0.944895	0.654787	0.9363	0.947115	0.135227	0.0154369		0.967043	0.047385	0.0472498	0.960164	0.014701	0.0461936
1.3423	1.05397	0.607152	1.0611	1.06227	0.0718832	0.174899		0.945043	0.654005	0.936077	0.947115	0.136115	0.0154369		0.967852	0.0470469	0.0469117	0.961102	0.0145298	0.0458513
1.3433	1.05386	0.606728	1.06068	1.06183	0.0711418	0.175888		0.945193	0.654117	0.936077	0.946449	0.134006	0.0151039		0.969747	0.046844	0.0467088	0.961875	0.0143587	0.0455945
1.3443	1.05402	0.606939	1.06089	1.06227	0.0708947	0.175592		0.944598	0.653894	0.934738	0.946116	0.13334	0.0153259		0.970963	0.0469117	0.0469117	0.962984	0.0142731	0.045509
1.3453	1.05439	0.607205	1.06139	1.06262	0.0716771	0.174949		0.943406	0.653894	0.934179	0.945561	0.132785	0.0141047		0.969679	0.0471145	0.046844	0.963156	0.014102	0.0452523
1.3463	1.05514	0.607311	1.06167	1.06207	0.0724185	0.174109		0.942961	0.653447	0.933957	0.944895	0.132452	0.0123283		0.968327	0.046844	0.0469793	0.962133	0.0144443	0.0451666
1.3473	1.05514	0.607205	1.06245	1.06138	0.0735303	0.173813		0.943853	0.653558	0.934738	0.945561	0.131453	0.0111072		0.967383	0.0469793	0.0468441	0.960766	0.0143587	0.0448244
1.3483	1.05524	0.606728	1.06301	1.06138	0.0737774	0.173813		0.944151	0.65367	0.935295	0.946559	0.131453	0.0115513		0.967111	0.0468441	0.0466412	0.960078	0.0143587	0.0447388
1.3493	1.05481	0.606463	1.06237	1.06148	0.0737774	0.173813		0.944151	0.654451	0.935183	0.946227	0.131564	0.0124395		0.967722	0.0467764	0.0465736	0.958539	0.0148721	0.0447388
1.3503	1.05418	0.607152	1.06132	1.06103	0.0748892	0.173763		0.944448	0.655457	0.935295	0.945339	0.125569	0.0136607		0.967852	0.0465736	0.0465736	0.958539	0.0152145	0.0448244
1.3513	1.05407	0.607628	1.06117	1.06089	0.0745186	0.174455		0.944151	0.655457	0.935408	0.946004	0.125346	0.0136607		0.967111	0.0467764	0.0467088	0.959477	0.0152145	0.0449955
1.3523	1.05412	0.607523	1.0616	1.06172	0.074148	0.174899		0.944895	0.65434	0.935408	0.946893	0.127567	0.0142157		0.966568	0.0466412	0.046506	0.959734	0.0149577	0.0449099
1.3533	1.05407	0.607205	1.06139	1.06187	0.0751363	0.175492		0.94549	0.654117	0.9363	0.947115	0.129343	0.0145488		0.9665	0.0468441	0.0467764	0.961273	0.0150433	0.0452523
1.3543	1.05418	0.606463	1.0621	1.06158	0.0750128	0.175048		0.944895	0.651549	0.935519	0.947781	0.13112	0.015548		0.966772	0.0469117	0.0466412	0.96393	0.0149577	0.0449955
1.3553	1.05412	0.605615	1.0621	1.06143	0.0740244	0.175048		0.943556	0.651103	0.934626	0.948114	0.13223	0.015215		0.966907	0.0466412	0.0463707	0.964781	0.0149577	0.0448244
1.3563	1.0537	0.605721	1.06174	1.06162	0.0734479	0.175344		0.942514	0.651549	0.934514	0.948669	0.132008	0.0137715		0.9665	0.0465736	0.0462355	0.964953	0.0148721	0.0448244
1.3573	1.05386	0.60641	1.06174	1.06123	0.0729538	0.174899		0.942068	0.651326	0.933957	0.947336	0.131009	0.0129945		0.967383	0.0464383	0.0460327	0.964781	0.0151289	0.0453378
1.3583	1.05375	0.606886	1.06216	1.06162	0.0729949	0.174899		0.942663	0.650211	0.933845	0.946227	0.127012	0.0115513		0.968191	0.0464383	0.0461679	0.964187	0.0144443	0.0455945
1.3593	1.05397	0.607523	1.06188	1.06103	0.0734068	0.174505		0.943853	0.651438	0.934849	0.946893	0.123237	0.0123284		0.968056	0.0466412	0.046506	0.961875	0.0145298	0.0460224
1.3603	1.05397	0.608317	1.0616	1.06068	0.0738597	0.174553		0.943853	0.651103	0.934961	0.948336	0.123792	0.0129945		0.967043	0.0469117	0.0465736	0.960938	0.0141875	0.0459369
1.3613	1.05365	0.607841	1.06132	1.06148	0.073695	0.175344		0.942961	0.652666	0.934402	0.948447	0.126124	0.0131056		0.965963	0.0469793	0.0467088	0.960336	0.0141875	0.0454234
1.3623	1.05365	0.606568	1.06146	1.06212	0.0738185	0.176086		0.942514	0.654898	0.934402	0.94878	0.127012	0.0133275		0.965827	0.0470469	0.0467764	0.960938	0.0146154	0.0455946
1.3633	1.05354	0.606357	1.06103	1.06222	0.0737362	0.176234		0.942365	0.656126	0.934068	0.947336	0.129343	0.0133276		0.966031	0.0469793	0.0469117	0.961359	0.0150433	0.045509
1.3643	1.05349	0.606515	1.06089	1.06118	0.0726243	0.175443		0.942365	0.652889	0.933732	0.945893	0.129343	0.0147708		0.966636	0.0469117	0.0467764	0.964617	0.0151289	0.0456802
1.3653	1.05392	0.60641	1.06188	1.06064	0.072336	0.174405		0.941918	0.649986	0.93351	0.944673	0.128455	0.0148819		0.966636	0.0469117	0.0467764	0.965297	0.0152145	0.0453378
1.3663	1.05497	0.605826	1.06266	1.06078	0.0715948	0.173615		0.942514	0.649541	0.93351	0.944673	0.12901	0.0143268		0.966167	0.0469793	0.0469117	0.963242	0.0152145	0.0453378
1.3673	1.0555	0.60535	1.06301	1.06118	0.0720477	0.173615		0.942514	0.649317	0.933732	0.94445	0.129898	0.0142157		0.965691	0.0471145	0.0467764	0.961102	0.0152145	0.045509
1.3683	1.05545	0.606092	1.06301	1.06153	0.0726243	0.173911		0.942811	0.649094	0.933957	0.944118	0.130454	0.0133276		0.965623	0.0469793	0.0466412	0.960852	0.0150433	0.0455945
1.3693	1.05519	0.606463	1.06266	1.06123	0.0729126	0.174257		0.942811	0.649875	0.934179	0.943673	0.131453	0.0129945		0.965963	0.0467764	0.0468441	0.961531	0.0153856	0.0454234
1.3703	1.05455	0.606304	1.06245	1.06153	0.0721713	0.175048		0.943406	0.650992	0.934514	0.944118	0.133451	0.0131055		0.966167	0.0469793	0.0467764	0.962305	0.0154712	0.0451666
1.3713	1.05407	0.605403	1.06195	1.06266	0.0724596	0.176135		0.943406	0.651773	0.934068	0.944339	0.133007	0.0128835		0.966031	0.0471821	0.0469793	0.9635	0.0149577	0.0451666
1.3723	1.05375	0.604766	1.06188	1.06321	0.072789	0.176629		0.942961	0.652107	0.933732	0.945782	0.133229	0.0132166		0.966907	0.0471145	0.0470469	0.963414	0.0151289	0.0452523
1.3733	1.05407	0.604979	1.06195	1.06311	0.072789	0.177321		0.942068	0.652666	0.933398	0.945672	0.132785	0.0123284		0.968463	0.0471821	0.0471145	0.96393	0.0149577	0.0452523
1.3743	1.05412	0.60641	1.06167	1.06241	0.0735302	0.176975		0.941621	0.65367	0.93351	0.946116	0.132119	0.0126615		0.969074	0.047385	0.0471145	0.96282	0.0146154	0.0451666
1.3753	1.05402	0.607099	1.06167	1.06153	0.0729538	0.176777		0.942663	0.654787	0.933732	0.94667	0.131786	0.0129945		0.968599	0.047385	0.0470469	0.96307	0.0144442	0.0450811
1.3763	1.05407	0.606197	1.06181	1.06093	0.0720477	0.176135		0.942365	0.65434	0.933621	0.946449	0.130898	0.0134386		0.967179	0.0471821	0.0471145	0.964016	0.014701	0.0445676
1.3773	1.05423	0.606039	1.06153	1.06024	0.0726243	0.176036		0.941471	0.652889	0.933175	0.946116	0.131009	0.0128835		0.966099	0.0469117	0.0468441	0.964867	0.0144442	0.0448244
1.3783	1.05407	0.606515	1.06096	1.06068	0.0733655	0.175641		0.940876	0.652777	0.932728	0.946004	0.13334	0.0132165		0.966099	0.0471821	0.0467088	0.965039	0.0146154	0.0449955
1.3793	1.05407	0.607046	1.06075	1.06128	0.0742716	0.174702		0.941918	0.653113	0.933287	0.94667	0.135227	0.0133276		0.965488	0.0469793	0.0465059	0.964102	0.0145298	0.0451666
1.3803	1.05439	0.607946	1.06103	1.06183	0.0736126	0.174899		0.942514	0.655679	0.933845	0.946559	0.132563	0.0134386		0.965759	0.0469793	0.0466412	0.964617	0.0144442	0.0450811
1.3813	1.05514	0.607311	1.06153	1.06192	0.0729126	0.175394		0.942663	0.656238	0.934068	0.946004	0.129343	0.0129945		0.96542	0.0469117	0.0466412	0.965641	0.0143587	0.0449955
1.3823	1.0555	0.60641	1.0621	1.06217	0.0736126	0.176432		0.942663	0.653894	0.933957	0.946116	0.128788	0.0127725		0.965895	0.0469793	0.0468441	0.96675	0.014273	0.0451666
1.3833	1.05577	0.605561	1.06245	1.06212	0.0749716	0.176728		0.942961	0.651996	0.933845	0.946338	0.129454	0.0132166		0.967586	0.0471145	0.0469117	0.967867	0.0142731	0.0452523
1.3843	1.05593	0.605615	1.0628	1.06143	0.0761248	0.176827		0.942811	0.651326	0.933175	0.946449	0.130231	0.0142157		0.968259	0.0472498	0.0469793	0.966664	0.0140163	0.0452523
1.3853	1.05598	0.606092	1.06301	1.06168	0.0761662	0.176777		0.942514	0.652443	0.933287	0.94667	0.130009	0.0143268		0.967586	0.0472498	0.0469793	0.96607	0.0144442	0.0450811
1.3863	1.05534	0.605826	1.06216	1.06192	0.0757541	0.176926		0.943704	0.654564	0.935183	0.947226	0.129454	0.0144377		0.966302	0.0471821	0.0471822	0.966328	0.0144443	0.0452523
1.3873	1.05439	0.606463	1.06125	1.06143	0.074848	0.176332		0.945639	0.655457	0.936523	0.946893	0.129343	0.0142158		0.966031	0.0471821	0.0471145	0.964187	0.0146154	0.0455945
1.3883	1.05338	0.606515	1.06019	1.06192	0.0735716	0.176036		0.94549	0.654564	0.936523	0.945561	0.127234	0.0137716		0.965623	0.0473173	0.0469117	0.963242	0.0147866	0.045509
1.3893	1.05338	0.606675	1.06047	1.06162	0.0722536	0.175394		0.944895	0.652889	0.935853	0.945005	0.125568	0.0142158		0.966167	0.0471145	0.0468441	0.962898	0.0147866	0.0452523
1.3903	1.05375	0.60641	1.06089	1.06168	0.0725008	0.174949		0.943109	0.650768	0.933957	0.944561	0.125902	0.0143268		0.966704	0.0469117	0.0467088	0.962648	0.0149577	0.0453378
1.3913	1.05418	0.606515	1.06117	1.06158	0.074642	0.174751		0.941769	0.649317	0.93351	0.944895	0.128788	0.0144378		0.966704	0.0470469	0.0467764	0.962133	0.0149577	0.0454234
1.3923	1.05486	0.606197	1.06245	1.06172	0.0763308	0.175641		0.940876	0.648647	0.933287	0.945782	0.13112	0.0145488		0.966167	0.0470469	0.0467764	0.96068	0.0147866	0.0453378
1.3933	1.05492	0.606197	1.06287	1.06197	0.0767835	0.17658		0.941323	0.651215	0.933287	0.946893	0.132008	0.0154369		0.966099	0.0470469	0.0468441	0.96025	0.0150433	0.0451666
1.3943	1.05471	0.606197	1.06259	1.06271	0.0757128	0.176332		0.940876	0.653558	0.932728	0.94667	0.132563	0.0147708		0.966031	0.0471821	0.0468441	0.962477	0.0150433	0.0456802
1.3953	1.05486	0.606145	1.06266	1.06395	0.0744362	0.176036		0.941174	0.654898	0.933287	0.946893	0.131786	0.0153259		0.965691	0.0470469	0.0469793	0.961703	0.0153856	0.045509
1.3963	1.05566	0.605508	1.0628	1.0637	0.0740656	0.175789		0.942365	0.654898	0.933732	0.947115	0.13012	0.0149928		0.965759	0.0472498	0.0471821	0.960594	0.0151289	0.045509
1.3973	1.05603	0.605085	1.06315	1.06296	0.0739421	0.176036		0.942068	0.654005	0.932951	0.94667	0.129121	0.0143268		0.966636	0.0469793	0.0469117	0.961187	0.0151289	0.045509
1.3983	1.05566	0.605032	1.06294	1.06177	0.0749715	0.175986		0.940876	0.653224	0.931947	0.94667	0.130786	0.0145488		0.966704	0.0471821	0.0467764	0.960852	0.0152145	0.0455946
1.3993	1.05524	0.605297	1.06252	1.06064	0.0753835	0.17658		0.940431	0.654228	0.931836	0.947115	0.134339	0.0146599		0.966907	0.0470469	0.0470469	0.962047	0.0150433	0.0449099
1.4003	1.05503	0.606092	1.06188	1.06093	0.0750951	0.177025		0.941026	0.653558	0.932058	0.947447	0.135338	0.0136607		0.967043	0.0472498	0.0470469	0.963844	0.0148721	0.0447388
1.4013	1.05524	0.606145	1.06188	1.06123	0.0764541	0.176283		0.940876	0.652107	0.931724	0.947226	0.134339	0.0139936		0.9665	0.0471145	0.0469117	0.964617	0.0147866	0.0447388
1.4023	1.05572	0.606145	1.06223	1.06118	0.0781015	0.175147		0.942068	0.651549	0.932617	0.946782	0.132563	0.0143268		0.965284	0.0470469	0.0468441	0.964781	0.014701	0.0449099
1.4033	1.05534	0.606145	1.06223	1.06098	0.0795429	0.175838		0.942961	0.651885	0.933621	0.945782	0.131786	0.0137716		0.964204	0.0469793	0.0467764	0.965211	0.0141875	0.0446532
1.4043	1.05603	0.605615	1.0633	1.06083	0.0805308	0.176184		0.942961	0.652666	0.934291	0.946227	0.13334	0.0137716		0.964877	0.0469793	0.0465736	0.963586	0.014102	0.0451666
1.4053	1.05566	0.606357	1.06294	1.06093	0.0803248	0.176135		0.942365	0.653113	0.933957	0.94667	0.133451	0.0143269		0.966636	0.0469117	0.0465059	0.962219	0.0142731	0.0449955
1.4063	1.05492	0.606568	1.0623	1.06093	0.0777308	0.176036		0.942663	0.652332	0.933957	0.946227	0.134006	0.015215		0.9665	0.0466412	0.0465736	0.962047	0.0146154	0.0453378
1.4073	1.05428	0.605879	1.06153	1.06068	0.0764128	0.176382		0.942216	0.651885	0.933845	0.94545	0.133451	0.0161031		0.965216	0.0467088	0.0464383	0.962219	0.0149577	0.0456802
1.4083	1.05423	0.605297	1.06167	1.06049	0.0748892	0.176283		0.943109	0.652332	0.934179	0.94445	0.130343	0.0156589		0.963796	0.0466412	0.0464383	0.964273	0.0146154	0.0455945
1.4093	1.05428	0.605297	1.06188	1.06034	0.074395	0.175789		0.943556	0.652219	0.934402	0.944339	0.127012	0.0158811		0.963796	0.0467088	0.046506	0.966414	0.0149577	0.0456802
1.4103	1.05481	0.606834	1.06223	1.06093	0.0748068	0.175592		0.943704	0.653	0.933957	0.944673	0.128677	0.01577		0.964272	0.0467764	0.0464383	0.966586	0.0147866	0.0457657
1.4113	1.05476	0.607152	1.06223	1.06074	0.0749716	0.175196		0.943406	0.652332	0.934291	0.945227	0.133006	0.0153259		0.966302	0.0470469	0.0467088	0.965727	0.0146154	0.0456802
1.4123	1.0546	0.60641	1.06223	1.06089	0.0742715	0.175097		0.943556	0.652107	0.934291	0.945227	0.135561	0.0145488		0.96792	0.0472498	0.0471145	0.96307	0.0145298	0.0457657
1.4133	1.05481	0.606197	1.06203	1.06148	0.0717595	0.174603		0.942961	0.652777	0.934291	0.944784	0.136227	0.0148819		0.968531	0.0472498	0.0470469	0.961187	0.014701	0.0457657
1.4143	1.05466	0.605933	1.06146	1.06217	0.070483	0.175344		0.942961	0.655457	0.934738	0.946004	0.135005	0.0151039		0.968259	0.0471145	0.0469793	0.962898	0.014701	0.0456802
1.4153	1.05402	0.605986	1.06082	1.06217	0.0709771	0.176086		0.943109	0.656349	0.934738	0.946338	0.134783	0.0141047		0.9665	0.0472498	0.0469793	0.965383	0.0145298	0.0458513
1.4163	1.05407	0.606568	1.06082	1.06172	0.0720066	0.176234		0.942811	0.655345	0.934402	0.946338	0.134006	0.0134386		0.966432	0.0471145	0.0468441	0.967094	0.0148721	0.0460224
1.4173	1.05481	0.606728	1.06174	1.06118	0.0731184	0.175344		0.941918	0.654787	0.933957	0.946227	0.132674	0.0135496		0.965623	0.0470469	0.0467764	0.967008	0.0148721	0.045509
1.4183	1.05503	0.606463	1.06223	1.06158	0.073695	0.173664		0.942365	0.654228	0.933732	0.945339	0.133784	0.0125504		0.965759	0.0467764	0.0465736	0.966664	0.0144442	0.0455945
1.4193	1.05514	0.606039	1.06252	1.06148	0.0736538	0.172824		0.942216	0.653558	0.93284	0.944784	0.134228	0.0124394		0.966636	0.0465736	0.046506	0.967781	0.0146154	0.0452523
1.4203	1.05455	0.605455	1.06181	1.06098	0.0754248	0.17312		0.942514	0.653224	0.933175	0.943896	0.134672	0.0129945		0.966907	0.0467764	0.0465736	0.967523	0.014701	0.045509
1.4213	1.05397	0.605085	1.06096	1.06079	0.0764128	0.173763		0.941769	0.653336	0.932728	0.943784	0.135449	0.0133276		0.967315	0.0466412	0.046506	0.966328	0.0147866	0.045509
1.4223	1.05365	0.60519	1.06061	1.06118	0.0748891	0.174159		0.942068	0.652219	0.932728	0.943673	0.136449	0.0145488		0.966772	0.0467764	0.0464383	0.965469	0.014701	0.0454234
1.4233	1.05392	0.605933	1.06103	1.06148	0.0728302	0.174801		0.942365	0.650656	0.933398	0.943673	0.135893	0.0166581		0.966235	0.0469117	0.046506	0.9635	0.0146154	0.0455945
1.4243	1.05418	0.607152	1.06146	1.06153	0.0733243	0.174356		0.943109	0.650211	0.934291	0.944895	0.134783	0.0169912		0.96684	0.0468441	0.046506	0.962734	0.0147009	0.0452523
1.4253	1.05445	0.607575	1.06117	1.06064	0.0732008	0.173961		0.943258	0.651438	0.934179	0.945893	0.13334	0.0154369		0.968802	0.0468441	0.0466412	0.962984	0.0145298	0.0450811
1.4263	1.05423	0.607417	1.06103	1.06039	0.0735302	0.173516		0.942663	0.652666	0.933844	0.946004	0.132452	0.0141047		0.96934	0.0469793	0.0467764	0.964273	0.0146154	0.0449955
1.4273	1.05338	0.606463	1.06047	1.05999	0.0741068	0.173615		0.941621	0.655121	0.932617	0.946449	0.130898	0.0153259		0.969475	0.0469117	0.046506	0.964867	0.0144442	0.0450811
1.4283	1.05296	0.606039	1.06019	1.06059	0.0747245	0.172726		0.941471	0.656015	0.9315	0.945782	0.130231	0.0154369		0.96887	0.0470469	0.0466412	0.964445	0.0144442	0.0450811
1.4293	1.0528	0.605774	1.06033	1.06093	0.0749716	0.173071		0.941621	0.655234	0.932058	0.94545	0.130786	0.0145488		0.968395	0.0467088	0.046506	0.963242	0.0146154	0.0449099
1.4303	1.05195	0.604608	1.05962	1.06162	0.0758774	0.173862		0.942514	0.652554	0.93284	0.945672	0.13012	0.0125505		0.967519	0.046844	0.046506	0.961703	0.0145298	0.0448244
1.4313	1.05216	0.603759	1.05948	1.06162	0.0751363	0.17485		0.943556	0.649429	0.934291	0.944562	0.131896	0.0119954		0.967111	0.0469117	0.0465736	0.960766	0.0143587	0.0450811
1.4323	1.05264	0.603548	1.06005	1.06153	0.0732007	0.175344		0.943406	0.647977	0.933957	0.943118	0.135116	0.0126615		0.966704	0.0469793	0.0467088	0.961016	0.0146154	0.0450811
1.4333	1.05365	0.604077	1.06139	1.06148	0.0728302	0.175246		0.943704	0.647977	0.934179	0.942341	0.135005	0.0138827		0.966167	0.046844	0.0466412	0.961359	0.014701	0.0449955
1.4343	1.0537	0.604608	1.06188	1.06227	0.0731596	0.175641		0.942514	0.651773	0.933175	0.941342	0.135116	0.0139938		0.965623	0.0468441	0.0467088	0.961617	0.0147866	0.0453378
1.4353	1.05402	0.604661	1.06188	1.06212	0.0748481	0.174998		0.942514	0.654117	0.932951	0.941342	0.134561	0.0145489		0.9665	0.0469793	0.0467088	0.96307	0.0149577	0.0454234
1.4363	1.05397	0.604872	1.06125	1.06202	0.0755481	0.175641		0.942811	0.655234	0.933287	0.943341	0.132341	0.0139936		0.966099	0.0469793	0.0466412	0.964445	0.0144442	0.0451666
1.4373	1.05423	0.605561	1.06153	1.06237	0.0754654	0.176234		0.942663	0.655679	0.933287	0.943896	0.132008	0.0142157		0.966568	0.0468441	0.0466412	0.965727	0.0145298	0.0453378
1.4383	1.0545	0.605508	1.06181	1.06237	0.0753835	0.175641		0.942663	0.656908	0.933398	0.942896	0.132452	0.0142158		0.967179	0.0470469	0.0467764	0.96675	0.014701	0.0455946
1.4393	1.05481	0.605032	1.06216	1.06183	0.0749716	0.174899		0.942365	0.657242	0.93351	0.941674	0.132008	0.0139936		0.968327	0.0472498	0.0471145	0.965555	0.0144442	0.045509
1.4403	1.05561	0.604395	1.06315	1.06138	0.0748892	0.174307		0.941026	0.657355	0.932505	0.942341	0.131231	0.0137716		0.968599	0.0471822	0.0469793	0.963328	0.0146154	0.0456802
1.4413	1.05545	0.603601	1.06301	1.06128	0.0757541	0.175048		0.939686	0.657689	0.931611	0.943451	0.132563	0.0137716		0.969006	0.0471145	0.0467764	0.961617	0.014701	0.0452522
1.4423	1.0554	0.60323	1.06259	1.06108	0.0761248	0.175394		0.940281	0.655679	0.931611	0.944562	0.131675	0.0123284		0.968191	0.0471821	0.0469793	0.959992	0.0147866	0.0449955
1.4433	1.05519	0.603654	1.06188	1.06148	0.0757955	0.17574		0.940579	0.653783	0.932281	0.94445	0.132008	0.0119954		0.967852	0.0470469	0.0467764	0.959992	0.0148721	0.0450811
1.4443	1.05545	0.604979	1.06259	1.06222	0.0753421	0.17569		0.941174	0.655791	0.932617	0.944118	0.131564	0.0119954		0.967586	0.0470469	0.0467764	0.961617	0.0149577	0.045509
1.4453	1.05524	0.605933	1.06294	1.06217	0.0749716	0.175097		0.942216	0.656461	0.932728	0.943896	0.131119	0.0129946		0.967315	0.0469117	0.0469117	0.963242	0.0151289	0.0453378
1.4463	1.05492	0.606728	1.06294	1.06187	0.0741892	0.175443		0.942961	0.655679	0.933398	0.943118	0.130342	0.0141047		0.967111	0.0467088	0.0468441	0.966242	0.0151289	0.045509
1.4473	1.05508	0.606781	1.0633	1.06192	0.073942	0.17574		0.942068	0.654564	0.93284	0.942785	0.129232	0.0148818		0.966364	0.0470469	0.0466412	0.968461	0.0152145	0.0455945
1.4483	1.05514	0.606515	1.06323	1.06187	0.0736126	0.17569		0.941769	0.653894	0.932281	0.941786	0.126346	0.0148819		0.965759	0.0469117	0.0467764	0.97018	0.0146154	0.0455945
1.4493	1.05455	0.606728	1.06237	1.06271	0.0733244	0.175789		0.941174	0.651885	0.931389	0.940565	0.124458	0.0147708		0.966031	0.0467088	0.0465736	0.970266	0.0149577	0.0456802
1.4503	1.05434	0.606675	1.06181	1.06296	0.072542	0.175641		0.940728	0.650098	0.931389	0.941453	0.124347	0.0137718		0.968056	0.0469117	0.0469117	0.968383	0.0149577	0.0455945
1.4513	1.0545	0.607205	1.06195	1.06247	0.0725008	0.176086		0.939984	0.648871	0.931611	0.94323	0.123792	0.0138826		0.969747	0.0470469	0.0469117	0.967437	0.0150434	0.0456802
1.4523	1.05439	0.607364	1.06181	1.06212	0.0745598	0.175986		0.941471	0.648535	0.932617	0.943673	0.124014	0.0153259		0.969407	0.0471822	0.0471145	0.966328	0.0145298	0.0453378
1.4533	1.05386	0.607046	1.06132	1.06177	0.0772774	0.176036		0.942068	0.648647	0.932617	0.944007	0.126457	0.0168801		0.968259	0.0471821	0.0472498	0.964953	0.0143587	0.045509
1.4543	1.05323	0.606463	1.06054	1.06098	0.0779368	0.176481		0.940876	0.649986	0.931724	0.944339	0.128899	0.0168803		0.966907	0.0474526	0.0471822	0.966414	0.0144443	0.0452523
1.4553	1.05312	0.605933	1.06019	1.06054	0.0771541	0.177074		0.940133	0.652332	0.93083	0.943673	0.129454	0.0166582		0.966302	0.047385	0.0473173	0.967094	0.0145298	0.0453378
1.4563	1.05359	0.60625	1.06089	1.0597	0.0760421	0.177469		0.940133	0.65367	0.9315	0.943562	0.13112	0.0161031		0.966568	0.0474526	0.0470469	0.96607	0.0143587	0.0452523
1.4573	1.05412	0.606145	1.06146	1.06039	0.0744775	0.177717		0.941026	0.65367	0.932281	0.944118	0.131231	0.01577		0.967451	0.0469117	0.0468441	0.965125	0.0147866	0.0450811
1.4583	1.05481	0.605826	1.0616	1.06143	0.0727477	0.177914		0.941471	0.652219	0.931947	0.944118	0.131009	0.0156591		0.968395	0.0467764	0.0467764	0.963672	0.0148722	0.0450811
1.4593	1.05545	0.605721	1.06203	1.06197	0.0721302	0.177568		0.941026	0.650545	0.931611	0.944673	0.132452	0.0153259		0.968259	0.0469793	0.0466412	0.963156	0.0147866	0.0449099
1.4603	1.05572	0.605721	1.06266	1.06168	0.0716771	0.177223		0.941026	0.651215	0.932505	0.944784	0.138336	0.0159922		0.967722	0.0469117	0.046844	0.961445	0.0148721	0.0451666
1.4613	1.05598	0.60641	1.06337	1.06183	0.0708535	0.177074		0.940579	0.652332	0.932617	0.944784	0.141555	0.015992		0.968123	0.0469793	0.0469117	0.961445	0.0145298	0.0455945
1.4623	1.05614	0.607152	1.06351	1.06133	0.0706477	0.176629		0.940579	0.651103	0.931947	0.943896	0.141445	0.0144377		0.968667	0.0469117	0.0469117	0.962984	0.0148721	0.0456802
1.4633	1.05519	0.607628	1.06252	1.06059	0.0729949	0.176234		0.940876	0.650433	0.931947	0.943341	0.137004	0.0145488		0.968938	0.0471821	0.0470469	0.964953	0.014701	0.0457657
1.4643	1.05418	0.607257	1.06174	1.0598	0.0749306	0.175641		0.940281	0.651215	0.931166	0.942896	0.132674	0.0127724		0.968667	0.0472498	0.0470469	0.966664	0.0151289	0.0458513
1.4653	1.05397	0.607152	1.06096	1.05989	0.0751774	0.175492		0.941026	0.652777	0.931724	0.942564	0.131897	0.0125505		0.968056	0.0470469	0.0469117	0.967437	0.0150433	0.045509
1.4663	1.05354	0.606728	1.06089	1.06049	0.0765361	0.174949		0.941323	0.653224	0.931724	0.943118	0.131675	0.0129945		0.967586	0.0470469	0.0469117	0.968297	0.0150433	0.045509
1.4673	1.05375	0.606568	1.06117	1.06162	0.0762895	0.17485		0.941174	0.653113	0.931724	0.943562	0.132119	0.0136607		0.966302	0.0473173	0.0470469	0.968547	0.0152145	0.0454234
1.4683	1.05434	0.606886	1.0616	1.06256	0.0756714	0.175295		0.939537	0.653224	0.931389	0.94323	0.134117	0.0143268		0.965284	0.0469117	0.0467088	0.967008	0.0149577	0.0454234
1.4693	1.05407	0.607205	1.06132	1.06316	0.0753421	0.174702		0.939834	0.653558	0.932058	0.943007	0.136227	0.0146599		0.965691	0.0468441	0.0467764	0.965984	0.0149577	0.0452523
1.4703	1.05397	0.608688	1.0611	1.06311	0.0751774	0.174109		0.940728	0.654564	0.932617	0.942785	0.137447	0.0143268		0.966167	0.0469793	0.0466412	0.964867	0.0144443	0.0453378
1.4713	1.05412	0.609484	1.06146	1.06232	0.0748892	0.174307		0.941769	0.653113	0.933398	0.942674	0.13767	0.0144378		0.96542	0.0469117	0.0468441	0.964016	0.0143587	0.0449955
1.4723	1.05492	0.60906	1.06195	1.06162	0.0750539	0.174307		0.941769	0.650768	0.932728	0.94223	0.133784	0.0149928		0.96508	0.0470469	0.0468441	0.964273	0.0146154	0.0451666
1.4733	1.05428	0.608424	1.06103	1.06168	0.0757955	0.175097		0.941174	0.649541	0.932281	0.942785	0.132119	0.0149928		0.966031	0.0471145	0.0467088	0.963672	0.0151289	0.0454234
1.4743	1.05365	0.607894	1.06054	1.06183	0.0739419	0.176432		0.941026	0.649764	0.932505	0.943784	0.131231	0.015215		0.967451	0.0473174	0.0469793	0.962477	0.0151289	0.0451666
1.4753	1.05365	0.60747	1.06054	1.06187	0.0726654	0.176283		0.940579	0.651215	0.931611	0.943784	0.129232	0.0137716		0.968191	0.0472498	0.0471145	0.963758	0.014701	0.0448244
1.4763	1.05381	0.606939	1.0611	1.06247	0.0730361	0.175888		0.940281	0.650545	0.930719	0.944007	0.127234	0.0135496		0.968259	0.0470469	0.0469117	0.965641	0.0148721	0.0450811
1.4773	1.05423	0.606886	1.06132	1.06202	0.0732832	0.175938		0.940281	0.648982	0.930496	0.94445	0.125458	0.0137716		0.969611	0.0471821	0.0469793	0.964953	0.0148721	0.0450811
1.4783	1.05418	0.606993	1.06146	1.06118	0.0738597	0.174899		0.940728	0.64876	0.930496	0.943451	0.125569	0.0143268		0.969407	0.0471822	0.0469793	0.964016	0.0150433	0.0453378
1.4793	1.05418	0.606728	1.0611	1.06044	0.0748892	0.174653		0.940579	0.650656	0.930719	0.942119	0.131009	0.0149928		0.967852	0.0471821	0.0469117	0.962133	0.0151289	0.045509
1.4803	1.05407	0.607575	1.06103	1.05965	0.0749304	0.174949		0.941621	0.649986	0.932058	0.943451	0.135449	0.0145488		0.966704	0.0471821	0.046844	0.961023	0.0148721	0.0459369
1.4813	1.05354	0.608424	1.06047	1.06014	0.0744362	0.175246		0.941471	0.650211	0.932505	0.945339	0.13878	0.0143268		0.966568	0.0469117	0.0467088	0.960938	0.0152145	0.0457657
1.4823	1.05344	0.608742	1.06061	1.06044	0.0729538	0.175048		0.940431	0.649541	0.932728	0.946004	0.140334	0.0138827		0.967247	0.0467764	0.0468441	0.96307	0.0152145	0.0457657
1.4833	1.05323	0.607946	1.06054	1.06049	0.0711007	0.1749		0.940876	0.647643	0.932393	0.946004	0.137559	0.0139936		0.967315	0.0469117	0.0468441	0.964359	0.0151289	0.0455945
1.4843	1.05317	0.607841	1.06061	1.06083	0.0703182	0.175344		0.941174	0.644963	0.932617	0.945672	0.135449	0.0133276		0.966975	0.046844	0.0467088	0.965812	0.0150433	0.0456802
1.4853	1.05296	0.607735	1.06026	1.06079	0.0702359	0.17574		0.941769	0.644518	0.933398	0.945339	0.135005	0.0129945		0.966099	0.0469117	0.0468441	0.967352	0.0150433	0.045509
1.4863	1.05285	0.606993	1.06054	1.06123	0.0704829	0.176432		0.941621	0.644963	0.932617	0.944007	0.134117	0.0141047		0.965827	0.0469793	0.0467088	0.968633	0.0148721	0.0454234
1.4873	1.05375	0.606834	1.06181	1.06148	0.0715949	0.176876		0.938793	0.64608	0.93016	0.94323	0.131119	0.0139936		0.96684	0.0470469	0.0469117	0.969148	0.0153	0.0456802
1.4883	1.05434	0.606728	1.06216	1.06153	0.0724595	0.177222		0.937304	0.646303	0.929268	0.943119	0.128677	0.0139936		0.967852	0.0470469	0.0469117	0.969063	0.0152145	0.0454234
1.4893	1.05418	0.606675	1.06188	1.06256	0.0722537	0.176679		0.936859	0.646192	0.928822	0.942119	0.126457	0.0144378		0.96887	0.0469117	0.0466412	0.968461	0.0150433	0.0451666
1.4903	1.0537	0.60641	1.06181	1.06331	0.0715125	0.175888		0.937899	0.647307	0.929379	0.942453	0.125901	0.0135496		0.969815	0.0470469	0.0469117	0.968297	0.0151289	0.0449099
1.4913	1.05359	0.605508	1.0616	1.06341	0.0713477	0.174949		0.939239	0.649317	0.930273	0.942674	0.129566	0.0126614		0.970154	0.0470469	0.0467088	0.967867	0.014701	0.0449955
1.4923	1.05359	0.604766	1.06153	1.06286	0.0711418	0.174653		0.939834	0.649541	0.930496	0.942674	0.133007	0.0125504		0.970222	0.0469793	0.0467764	0.967266	0.0147866	0.0448244
1.4933	1.05359	0.604608	1.06139	1.06262	0.0715124	0.173961		0.939834	0.650656	0.930942	0.943118	0.13445	0.0134386		0.968735	0.0468441	0.0467088	0.967094	0.0150433	0.0453378
1.4943	1.0537	0.604926	1.0611	1.06207	0.0732421	0.174356		0.940281	0.649764	0.931277	0.942674	0.13334	0.014993		0.967586	0.0467764	0.0465059	0.966578	0.0150433	0.0459369
1.4953	1.05365	0.605244	1.06075	1.06227	0.0736538	0.175394		0.939834	0.649764	0.9315	0.942785	0.132341	0.0156591		0.967519	0.0468441	0.046506	0.966664	0.0146154	0.0457657
1.4963	1.05317	0.60519	1.06075	1.06281	0.0748892	0.17574		0.939686	0.650322	0.930607	0.943673	0.131453	0.015992		0.96792	0.0469117	0.0465736	0.965039	0.0146154	0.045509
1.4973	1.05338	0.606039	1.06153	1.06316	0.0754248	0.175592		0.938346	0.649986	0.929603	0.944007	0.131231	0.0156589		0.968531	0.0471145	0.0468441	0.96393	0.014701	0.0449099
1.4983	1.05428	0.606515	1.06273	1.06217	0.074848	0.175295		0.937304	0.649986	0.929045	0.944561	0.13223	0.0147708		0.968056	0.0470469	0.0469793	0.963586	0.014102	0.0449099
1.4993	1.05466	0.606568	1.06294	1.06123	0.0745186	0.175492		0.937751	0.651662	0.929379	0.944228	0.134783	0.0151039		0.967247	0.0471821	0.0467088	0.964016	0.0139308	0.0450811
1.5003	1.05466	0.606728	1.0628	1.06123	0.0742304	0.175344		0.938644	0.652219	0.930049	0.945116	0.136226	0.0156589		0.967179	0.0469793	0.0467764	0.964273	0.0138452	0.0457657
1.5013	1.05455	0.607205	1.06237	1.06227	0.0736538	0.175097		0.939834	0.651996	0.930719	0.944895	0.136227	0.0161031		0.967852	0.0469793	0.0468441	0.964445	0.0143587	0.0459369
1.5023	1.05407	0.60853	1.06181	1.06286	0.0737774	0.17485		0.939686	0.650322	0.931166	0.943896	0.134561	0.0168803		0.968531	0.0468441	0.0467088	0.964953	0.0147866	0.0457657
1.5033	1.0537	0.608795	1.06132	1.06237	0.0741067	0.174553		0.940133	0.648871	0.9315	0.943007	0.131897	0.0168803		0.96887	0.046844	0.0467088	0.965469	0.0149577	0.0454234
1.5043	1.05381	0.607682	1.06096	1.06187	0.0747246	0.173813		0.939389	0.646639	0.931611	0.942785	0.130342	0.015992		0.967654	0.0471145	0.0467088	0.964102	0.0148721	0.045509
1.5053	1.0537	0.607046	1.06103	1.06177	0.0739009	0.173516		0.938346	0.646192	0.930607	0.942008	0.129343	0.0153259		0.967247	0.0472498	0.0470469	0.963242	0.0148721	0.0454234
1.5063	1.05344	0.60641	1.06096	1.06197	0.0734068	0.173664		0.937602	0.647084	0.929492	0.941564	0.129343	0.0153259		0.967179	0.047385	0.0472498	0.962047	0.014701	0.0454234
1.5073	1.05301	0.606781	1.06068	1.06123	0.0734068	0.173714		0.937454	0.649094	0.929603	0.942453	0.128677	0.0152149		0.967383	0.0474526	0.0471145	0.962477	0.0145298	0.0451666
1.5083	1.05264	0.606834	1.06033	1.06108	0.0742715	0.174505		0.938942	0.650322	0.930049	0.942008	0.129787	0.0142157		0.967852	0.0473173	0.0471822	0.96307	0.0143587	0.0453378
1.5093	1.05296	0.607257	1.06117	1.06138	0.0749304	0.174653		0.940133	0.650433	0.93083	0.941674	0.132785	0.0139936		0.968056	0.0473173	0.0471821	0.962391	0.014102	0.0449099
1.5103	1.05328	0.607205	1.06103	1.06118	0.074848	0.175196		0.941026	0.651438	0.931947	0.94112	0.140001	0.0135496		0.968667	0.0473173	0.0471821	0.961273	0.0146154	0.0450811
1.5113	1.05359	0.607364	1.06068	1.06128	0.0745186	0.175344		0.940281	0.652666	0.931611	0.941453	0.146107	0.0142158		0.969407	0.046844	0.0467764	0.960766	0.0145298	0.0452523
1.5123	1.05428	0.607523	1.06139	1.06192	0.0743539	0.175196		0.940431	0.653113	0.931947	0.941674	0.145774	0.0144377		0.969679	0.0467088	0.0466412	0.961187	0.0147866	0.0454234
1.5133	1.05445	0.606939	1.06203	1.06241	0.0751774	0.176283		0.941174	0.651996	0.931724	0.942119	0.141111	0.0145488		0.968938	0.0467088	0.0463707	0.96068	0.0151289	0.0451667
1.5143	1.05418	0.607257	1.06188	1.06291	0.0761662	0.176481		0.939834	0.651215	0.93083	0.942564	0.137226	0.0135496		0.967852	0.0465736	0.0465059	0.959992	0.0151289	0.0451666
1.5153	1.05402	0.608	1.06132	1.06252	0.0759602	0.176234		0.939389	0.650768	0.930496	0.942674	0.134672	0.0122174		0.967654	0.0464383	0.0464383	0.961102	0.0148721	0.045509
1.5163	1.05338	0.608106	1.06075	1.06202	0.0761662	0.176086		0.939537	0.650768	0.930496	0.940676	0.133895	0.0128835		0.969006	0.0466412	0.0464383	0.964273	0.0152145	0.0448244
1.5173	1.05296	0.608371	1.0604	1.06192	0.0750951	0.175245		0.938644	0.65088	0.930385	0.940786	0.134672	0.0122173		0.969679	0.0468441	0.0467088	0.964445	0.0152145	0.0449955
1.5183	1.0528	0.608317	1.06019	1.06212	0.0744362	0.174702		0.938049	0.651326	0.929826	0.940897	0.134561	0.0132166		0.969951	0.0469117	0.0469117	0.964016	0.0151289	0.0449099
1.5193	1.05317	0.607735	1.06054	1.06158	0.0744362	0.174208		0.938496	0.652107	0.929826	0.941897	0.133562	0.0148818		0.969475	0.0473173	0.0471821	0.964703	0.014701	0.0449955
1.5203	1.0528	0.606622	1.06019	1.06059	0.0746834	0.173763		0.939834	0.650098	0.930385	0.941897	0.128233	0.0145488		0.968938	0.0473173	0.0470469	0.966586	0.0148721	0.0451666
1.5213	1.05285	0.60519	1.05969	1.06024	0.0743539	0.173961		0.940876	0.64809	0.931389	0.943007	0.125791	0.0156591		0.968463	0.0470469	0.0469117	0.967266	0.0146154	0.0449099
1.5223	1.05206	0.604714	1.05934	1.06039	0.0746421	0.17401		0.941026	0.647196	0.931836	0.943341	0.126346	0.0168801		0.968327	0.0471145	0.0467764	0.96675	0.0144443	0.0448244
1.5233	1.05232	0.605032	1.05976	1.06103	0.074642	0.174059		0.940431	0.646303	0.931277	0.942564	0.128122	0.0174353		0.969074	0.0470469	0.046844	0.966586	0.0146154	0.0450811
1.5243	1.05285	0.605297	1.05997	1.06128	0.073242	0.17485		0.940133	0.647308	0.931277	0.942341	0.129121	0.0166581		0.969142	0.0469117	0.0466412	0.967609	0.014701	0.0449955
1.5253	1.0529	0.605508	1.0604	1.06153	0.0727067	0.175641		0.939091	0.649317	0.930719	0.94223	0.128788	0.0153259		0.968395	0.0467764	0.0464383	0.969664	0.0151289	0.0448244
1.5263	1.05365	0.606092	1.06146	1.06143	0.0740656	0.175641		0.938049	0.649986	0.929826	0.941786	0.128344	0.0142158		0.967586	0.0466412	0.0464383	0.971203	0.0149577	0.0449955
1.5273	1.05386	0.606039	1.06174	1.06148	0.0746833	0.175938		0.937602	0.650768	0.929379	0.94112	0.128899	0.0141047		0.967519	0.0468441	0.0467088	0.97043	0.0148722	0.0453378
1.5283	1.05407	0.60641	1.06167	1.06153	0.0746833	0.176432		0.936709	0.650433	0.928264	0.941231	0.131453	0.0147708		0.968123	0.0469793	0.0469117	0.969578	0.0148721	0.0454234
1.5293	1.05354	0.607257	1.06139	1.06158	0.0745186	0.176679		0.937304	0.650768	0.928264	0.941786	0.137558	0.0163251		0.968123	0.0469117	0.0466412	0.968719	0.0146154	0.0454234
1.5303	1.05306	0.607628	1.06068	1.06172	0.0746834	0.17653		0.938049	0.652219	0.928486	0.942785	0.136449	0.0171023		0.96792	0.0469117	0.0467088	0.965383	0.014701	0.0454234
1.5313	1.05344	0.607152	1.06075	1.06148	0.0753835	0.175443		0.939091	0.651662	0.929715	0.943118	0.133229	0.0166581		0.967586	0.0467764	0.0466412	0.964617	0.0143587	0.0454234
1.5323	1.05386	0.606304	1.06103	1.06103	0.0768662	0.1749		0.939389	0.652219	0.930719	0.942008	0.132563	0.0164361		0.966704	0.0469117	0.0465736	0.963672	0.0146154	0.0454234
1.5333	1.05397	0.605879	1.0611	1.06074	0.0787602	0.17485		0.939091	0.651549	0.930496	0.940786	0.133895	0.0163251		0.966099	0.0469117	0.0465736	0.963414	0.0149577	0.045509
1.5343	1.05365	0.605721	1.06089	1.06049	0.0786774	0.175492		0.938793	0.650545	0.929826	0.941009	0.132896	0.0164361		0.966636	0.0467764	0.0466412	0.965898	0.0148721	0.045509
1.5353	1.05354	0.605774	1.06082	1.06039	0.0777722	0.175986		0.938942	0.649317	0.93016	0.941564	0.133007	0.01577		0.967179	0.0465736	0.0464383	0.967953	0.0150433	0.0454234
1.5363	1.05328	0.60641	1.06054	1.06029	0.0765368	0.17653		0.938496	0.649764	0.93016	0.940676	0.132674	0.01577		0.967852	0.0466412	0.0462355	0.970945	0.014701	0.0449955
1.5373	1.05349	0.607417	1.06026	1.06049	0.0751774	0.176876		0.937602	0.652666	0.93016	0.940231	0.132008	0.0146597		0.968123	0.0466412	0.0463031	0.969836	0.0147866	0.0448244
1.5383	1.05359	0.608635	1.06012	1.06034	0.0741892	0.176086		0.937751	0.655679	0.93016	0.940897	0.131564	0.0139936		0.968056	0.0467088	0.0463707	0.968547	0.0146154	0.0448244
1.5393	1.05439	0.609219	1.06096	1.06153	0.0739832	0.175986		0.937899	0.655234	0.929826	0.941008	0.133451	0.0135496		0.967722	0.046844	0.046506	0.965555	0.0146154	0.0449955
1.5403	1.05471	0.609113	1.06167	1.06252	0.0748481	0.175542		0.938346	0.649875	0.929715	0.941008	0.128566	0.0142158		0.96792	0.0471821	0.0467764	0.963156	0.0147866	0.0449955
1.5413	1.05492	0.608371	1.06216	1.06212	0.0752188	0.174603		0.938942	0.646639	0.929715	0.942119	0.118463	0.0142157		0.968327	0.0471145	0.0469117	0.961875	0.0148721	0.0453378
1.5423	1.0546	0.607152	1.06188	1.06222	0.074848	0.174059		0.938942	0.648982	0.93016	0.94323	0.11369	0.0146597		0.969074	0.0471822	0.0469117	0.962562	0.0145298	0.0447388
1.5433	1.05471	0.606515	1.0623	1.06301	0.0748892	0.174257		0.937899	0.650992	0.929826	0.943784	0.115355	0.0143268		0.969407	0.0469793	0.0469793	0.964359	0.014701	0.0449099
1.5443	1.05514	0.606463	1.06287	1.06331	0.0757955	0.174702		0.937751	0.651662	0.929045	0.943341	0.120462	0.0142157		0.96921	0.0469793	0.0467088	0.964781	0.0151289	0.0449099
1.5453	1.05492	0.606993	1.06259	1.06296	0.0755068	0.174455		0.937156	0.652554	0.928709	0.942674	0.125569	0.0146597		0.968735	0.0471821	0.0468441	0.964531	0.0147866	0.0446532
1.5463	1.05471	0.607046	1.06237	1.06262	0.074848	0.174109		0.937602	0.651326	0.92949	0.942341	0.130342	0.0152149		0.968667	0.0469117	0.0467764	0.965641	0.0150433	0.0447388
1.5473	1.05439	0.606357	1.0623	1.06172	0.0735302	0.174159		0.938346	0.649986	0.928933	0.941564	0.133007	0.0151039		0.968802	0.0468441	0.046506	0.965812	0.014701	0.0449955
1.5483	1.05412	0.606092	1.06203	1.06158	0.0727067	0.174356		0.938346	0.648424	0.929603	0.94012	0.133562	0.0138827		0.968667	0.0469117	0.0466412	0.965383	0.0146154	0.0449955
1.5493	1.05445	0.606304	1.06216	1.06183	0.0726244	0.174553		0.939686	0.647643	0.930942	0.939343	0.135338	0.0133276		0.968463	0.0471145	0.0466412	0.964867	0.0147866	0.0451666
1.5503	1.0546	0.606939	1.0623	1.06202	0.0742305	0.175196		0.939984	0.646861	0.9315	0.939454	0.137115	0.0133276		0.968463	0.0469793	0.0469117	0.964781	0.0150433	0.0454234
1.5513	1.05455	0.607311	1.06195	1.06232	0.0746421	0.175097		0.940579	0.64608	0.9315	0.94012	0.139668	0.0139936		0.967586	0.0471821	0.0471145	0.966414	0.0149577	0.0455945
1.5523	1.05418	0.607523	1.06188	1.06271	0.0736538	0.17485		0.939834	0.646973	0.931166	0.940231	0.140223	0.0149928		0.96684	0.0473173	0.0470469	0.967695	0.0150433	0.0452523
1.5533	1.05402	0.607575	1.06089	1.06281	0.0745598	0.175097		0.938644	0.646639	0.929937	0.939899	0.139668	0.015992		0.967519	0.0472498	0.0469793	0.968211	0.0152145	0.0451666
1.5543	1.05365	0.607417	1.06005	1.06266	0.0751775	0.175147		0.937304	0.646973	0.92949	0.939899	0.138114	0.0151039		0.968056	0.0471145	0.0469117	0.967609	0.0151289	0.0450811
1.5553	1.05344	0.606993	1.05948	1.06232	0.0754654	0.175295		0.937156	0.648647	0.929379	0.94012	0.133895	0.0147708		0.967852	0.0468441	0.0466412	0.966328	0.0149577	0.0451666
1.5563	1.05381	0.606568	1.06012	1.06197	0.0744774	0.175147		0.936561	0.648201	0.929045	0.941342	0.131675	0.0146599		0.968463	0.0467764	0.046506	0.966328	0.0147866	0.0452523
1.5573	1.05412	0.606781	1.06089	1.06093	0.0743951	0.17485		0.935072	0.64809	0.928039	0.941897	0.129343	0.0143268		0.968735	0.0469117	0.0466412	0.965297	0.0149577	0.0452523
1.5583	1.05428	0.606939	1.06174	1.05999	0.0743127	0.174208		0.934924	0.649428	0.927371	0.941564	0.129565	0.0152149		0.968938	0.0469117	0.0467764	0.964102	0.0144443	0.0452523
1.5593	1.0546	0.607575	1.06195	1.06014	0.0743538	0.17322		0.935519	0.650433	0.928039	0.941231	0.133451	0.0158809		0.969142	0.0469117	0.0467088	0.963328	0.0143587	0.0449955
1.5603	1.05466	0.608212	1.06181	1.06034	0.0740656	0.173417		0.936412	0.649094	0.929379	0.940786	0.134006	0.0154369		0.969407	0.0469117	0.0467764	0.961875	0.0145298	0.0451666
1.5613	1.05428	0.608212	1.06146	1.06044	0.0739009	0.174159		0.937602	0.648535	0.930385	0.941009	0.136893	0.0146599		0.96921	0.0469117	0.0467764	0.962648	0.014701	0.0445677
1.5623	1.05375	0.607841	1.06103	1.06093	0.0738186	0.175344		0.937454	0.64742	0.929937	0.941564	0.138558	0.0145488		0.969142	0.0471821	0.0469117	0.964617	0.0147866	0.0446532
1.5633	1.05423	0.608159	1.06132	1.06153	0.0744362	0.17574		0.937304	0.645969	0.92949	0.942896	0.137226	0.0141047		0.96887	0.0471821	0.0470469	0.965125	0.014701	0.0446532
1.5643	1.05455	0.608106	1.06132	1.06237	0.0749716	0.175888		0.936709	0.644071	0.928486	0.942785	0.133895	0.0146599		0.968123	0.0472498	0.0469793	0.9665	0.0146154	0.0451666
1.5653	1.05486	0.608159	1.0623	1.06247	0.0753835	0.175246		0.935965	0.645188	0.928152	0.941453	0.131564	0.015548		0.96792	0.047385	0.0470469	0.966664	0.0141875	0.0453378
1.5663	1.05471	0.607628	1.06223	1.06262	0.073942	0.175641		0.935519	0.645745	0.92737	0.941453	0.131119	0.0161031		0.967654	0.047385	0.0472498	0.963758	0.0144443	0.0454234
1.5673	1.05466	0.607311	1.06181	1.06227	0.0740244	0.175196		0.936561	0.648312	0.928152	0.941009	0.131342	0.015548		0.967852	0.0472498	0.0471821	0.963758	0.0143587	0.0458513
1.5683	1.05434	0.607417	1.06153	1.06237	0.0737774	0.175147		0.938198	0.650211	0.929715	0.941674	0.132674	0.0154369		0.966975	0.0471822	0.0469117	0.964102	0.0139308	0.045509
1.5693	1.05402	0.607205	1.06139	1.06262	0.0738186	0.175986		0.937751	0.651326	0.929603	0.941342	0.134783	0.0145489		0.966636	0.0471821	0.0471821	0.964016	0.0138452	0.0455945
1.5703	1.05412	0.606463	1.0616	1.06192	0.0746422	0.175938		0.937454	0.651662	0.929603	0.941453	0.131786	0.0143268		0.966975	0.0471822	0.0469117	0.964531	0.0142731	0.0453378
1.5713	1.05381	0.606568	1.06139	1.06227	0.0750539	0.175394		0.937454	0.651549	0.92949	0.939566	0.127456	0.0134386		0.967451	0.0469793	0.0470469	0.965039	0.0141875	0.0453378
1.5723	1.05306	0.607894	1.06061	1.06291	0.0752188	0.17485		0.936561	0.651996	0.928264	0.938455	0.126457	0.0134386		0.967451	0.0471821	0.0469117	0.965984	0.0142731	0.0449099
1.5733	1.05301	0.608159	1.06047	1.06271	0.0753008	0.174751		0.936709	0.653447	0.928822	0.939343	0.127012	0.0147709		0.968327	0.0471145	0.0468441	0.966242	0.0144442	0.0449099
1.5743	1.05333	0.60853	1.06082	1.06237	0.0755068	0.175196		0.938049	0.655457	0.929045	0.940676	0.130009	0.0152149		0.968531	0.0469117	0.0467764	0.962734	0.0146154	0.0452523
1.5753	1.05397	0.608317	1.06075	1.06168	0.075054	0.175986		0.938942	0.655679	0.92949	0.940676	0.131675	0.0149928		0.968327	0.0467764	0.0467088	0.959219	0.0151288	0.0454234
1.5763	1.05402	0.607735	1.06089	1.06128	0.0737362	0.176036		0.939834	0.654228	0.930049	0.940676	0.132341	0.0152149		0.968531	0.0468441	0.0467764	0.958195	0.0153	0.045509
1.5773	1.05402	0.60747	1.06132	1.06162	0.0732008	0.174998		0.938496	0.653894	0.929379	0.939454	0.133562	0.0148819		0.969407	0.0470469	0.0466412	0.959305	0.0151289	0.045509
1.5783	1.05466	0.607046	1.0623	1.06177	0.0733656	0.175246		0.938049	0.652332	0.929045	0.938788	0.135338	0.0134386		0.969006	0.0470469	0.0466412	0.962133	0.0151289	0.0452523
1.5793	1.05508	0.606568	1.0633	1.06187	0.0740244	0.174405		0.937602	0.650992	0.928486	0.939454	0.135672	0.0126615		0.968802	0.0468441	0.0468441	0.965211	0.0148721	0.0451666
1.5803	1.0546	0.606304	1.06273	1.06217	0.075054	0.174455		0.938049	0.647865	0.929156	0.941453	0.134006	0.0118843		0.969006	0.0471145	0.046844	0.967953	0.0145298	0.045509
1.5813	1.05392	0.606304	1.06181	1.06172	0.0755895	0.174899		0.938496	0.646861	0.930049	0.941342	0.131453	0.0117733		0.96887	0.0474526	0.0470469	0.969234	0.0148721	0.0456802
1.5823	1.05381	0.605933	1.06167	1.06162	0.0749305	0.174702		0.937602	0.647643	0.929937	0.941674	0.129676	0.0125504		0.96792	0.0473173	0.0469117	0.968805	0.0147866	0.0455945
1.5833	1.05386	0.605561	1.06117	1.06158	0.0754654	0.174751		0.936412	0.647643	0.928821	0.941564	0.129343	0.0135497		0.968327	0.0471821	0.0471145	0.966242	0.0146154	0.0455946
1.5843	1.05344	0.604766	1.06068	1.06177	0.0753835	0.175246		0.935667	0.649764	0.928709	0.940897	0.131009	0.0135496		0.96921	0.0471145	0.0469117	0.963844	0.014701	0.0454234
1.5853	1.05375	0.60535	1.06082	1.06177	0.0755068	0.174653		0.936859	0.652443	0.929268	0.940786	0.131453	0.0134386		0.970494	0.0471145	0.0467764	0.962305	0.0149577	0.0449955
1.5863	1.05423	0.606568	1.06153	1.06143	0.0756714	0.17401		0.936561	0.651885	0.928933	0.939343	0.131231	0.0132165		0.970562	0.0469793	0.0467088	0.96282	0.0150433	0.0447388
1.5873	1.0545	0.607682	1.06216	1.06123	0.0747245	0.173763		0.937602	0.649541	0.92949	0.939565	0.131231	0.0128835		0.970759	0.0471145	0.0468441	0.96393	0.0147866	0.0454234
1.5883	1.05381	0.607735	1.06125	1.06103	0.0753421	0.173763		0.938049	0.647643	0.929268	0.939565	0.13223	0.0125504		0.97063	0.0470469	0.0467088	0.965039	0.0145298	0.0451666
1.5893	1.0527	0.607364	1.05997	1.06143	0.0755895	0.173862		0.938942	0.646526	0.929379	0.940343	0.136893	0.0131056		0.969747	0.0471821	0.0469117	0.965469	0.014701	0.0451666
1.5903	1.05174	0.607152	1.05955	1.06158	0.0764541	0.173417		0.938942	0.644071	0.929603	0.940565	0.138669	0.0128835		0.968599	0.0473173	0.0469793	0.965125	0.0146154	0.0449955
1.5913	1.05179	0.607257	1.05962	1.06089	0.0780602	0.173466		0.938793	0.644629	0.929268	0.940786	0.135782	0.0137716		0.967179	0.0471821	0.0470469	0.965211	0.0140164	0.0451666
1.5923	1.05211	0.606886	1.05948	1.05989	0.0799541	0.173516		0.938346	0.645969	0.929045	0.941008	0.13112	0.0138827		0.966235	0.0472498	0.0470469	0.965469	0.0142731	0.0452522
1.5933	1.0528	0.606622	1.06033	1.06034	0.0797481	0.173022		0.938198	0.647308	0.929268	0.941231	0.128566	0.0136607		0.966099	0.0471145	0.046844	0.965555	0.0146154	0.0453378
1.5943	1.05349	0.605508	1.06061	1.06049	0.0779774	0.173565		0.938346	0.647754	0.93016	0.942119	0.128677	0.0127725		0.967111	0.0471145	0.046844	0.967008	0.0150433	0.0452523
1.5953	1.05381	0.605085	1.06054	1.05999	0.0765368	0.174059		0.939537	0.64876	0.9315	0.941564	0.1279	0.0131055		0.968259	0.0471145	0.0469793	0.969492	0.0152145	0.0451666
1.5963	1.05375	0.604979	1.06026	1.05999	0.0752602	0.174702		0.938942	0.649541	0.931389	0.940897	0.127456	0.0144378		0.969142	0.0470469	0.0467088	0.971289	0.0153	0.0452523
1.5973	1.05365	0.606039	1.06005	1.06059	0.0740656	0.175246		0.937899	0.649094	0.930273	0.94112	0.127456	0.0145488		0.969611	0.0472498	0.0467764	0.971117	0.014701	0.0449955
1.5983	1.0537	0.607575	1.06096	1.06148	0.0736538	0.175542		0.938049	0.648201	0.930496	0.940897	0.12568	0.0141047		0.969747	0.0473173	0.0469117	0.969406	0.0144443	0.0447388
1.5993	1.0546	0.608	1.06203	1.06183	0.0739009	0.175938		0.938198	0.648647	0.929826	0.940676	0.124569	0.0138826		0.969951	0.0471821	0.0471821	0.966242	0.0142731	0.0449099
1.6003	1.05524	0.60747	1.06252	1.06197	0.0737362	0.176135		0.938198	0.650656	0.929603	0.939454	0.121905	0.0138827		0.969074	0.0471821	0.0469793	0.963328	0.0141875	0.045509
1.6013	1.05519	0.606622	1.0623	1.06247	0.0739832	0.176382		0.937751	0.651549	0.929156	0.938677	0.117353	0.0144378		0.968531	0.0470469	0.0467764	0.9635	0.0145298	0.0453378
1.6023	1.05481	0.606304	1.0621	1.06227	0.0734892	0.176432		0.938198	0.650211	0.929045	0.937234	0.11924	0.0142157		0.967519	0.0471145	0.046844	0.965555	0.0143587	0.0453378
1.6033	1.05455	0.606463	1.06203	1.06271	0.0734479	0.175789		0.937007	0.649764	0.927928	0.936791	0.122571	0.0145488		0.967654	0.0470469	0.0469117	0.967437	0.0144443	0.0453378
1.6043	1.05481	0.606092	1.06245	1.06266	0.0741068	0.175097		0.937156	0.649428	0.927371	0.937234	0.12468	0.0151039		0.967586	0.0471145	0.0470469	0.970688	0.0141875	0.045509
1.6053	1.05445	0.606039	1.06245	1.06266	0.0740656	0.174949		0.935519	0.648871	0.926365	0.937234	0.126457	0.0149928		0.967315	0.0473849	0.0470469	0.971289	0.0144442	0.0455945
1.6063	1.05486	0.606357	1.06351	1.06232	0.0751363	0.174899		0.935221	0.64809	0.927258	0.938234	0.127234	0.0146597		0.967315	0.047385	0.0471145	0.970945	0.0145298	0.0452523
1.6073	1.05486	0.606463	1.06351	1.06262	0.074601	0.174653		0.936114	0.647531	0.927482	0.939011	0.129565	0.0139936		0.967586	0.0471821	0.0469793	0.96932	0.0145298	0.045509
1.6083	1.0546	0.606092	1.06337	1.06301	0.074395	0.174801		0.93537	0.647531	0.927147	0.9389	0.130675	0.0133276		0.96792	0.0470469	0.046844	0.968297	0.0141875	0.0449099
1.6093	1.0545	0.60641	1.0628	1.06341	0.0735303	0.174751		0.93537	0.647865	0.927035	0.938788	0.131564	0.0135496		0.969006	0.0470469	0.0467764	0.967437	0.0144443	0.0446532
1.6103	1.05434	0.606886	1.06266	1.06375	0.0734479	0.175097		0.935221	0.647754	0.926365	0.938677	0.131009	0.0129945		0.970358	0.0469793	0.0467088	0.96675	0.0149577	0.044482
1.6113	1.05481	0.607523	1.06223	1.06405	0.0740656	0.175246		0.935519	0.648535	0.926031	0.939122	0.134117	0.0123284		0.970827	0.0469793	0.0465736	0.965727	0.0146154	0.0445677
1.6123	1.0546	0.607205	1.06181	1.06405	0.0749717	0.174949		0.936561	0.649986	0.926924	0.940009	0.136004	0.0131056		0.970895	0.0469117	0.0467088	0.965898	0.0148722	0.0452523
1.6133	1.05497	0.606781	1.06146	1.06385	0.0751775	0.175492		0.936709	0.652332	0.927482	0.94012	0.133562	0.0142158		0.971302	0.0469793	0.0467088	0.9665	0.0148721	0.0456802
1.6143	1.05476	0.606675	1.06139	1.06326	0.0753835	0.175443		0.937156	0.652219	0.928152	0.940343	0.132896	0.0143268		0.971167	0.0469117	0.0467764	0.967266	0.0146154	0.0457657
1.6153	1.05428	0.606515	1.06125	1.06177	0.0742716	0.175394		0.937156	0.651662	0.928709	0.939899	0.132563	0.0138827		0.970827	0.0470469	0.0467088	0.967781	0.0149577	0.0454234
1.6163	1.05481	0.607046	1.0616	1.06113	0.0734479	0.174949		0.936114	0.650992	0.92737	0.939343	0.132896	0.0139936		0.970494	0.0470469	0.0468441	0.966586	0.0150433	0.0456802
1.6173	1.05508	0.607628	1.0621	1.06064	0.0722949	0.174257		0.934924	0.651885	0.927258	0.939122	0.133118	0.0149928		0.970019	0.0470469	0.0470469	0.966242	0.0149577	0.0455945
1.6183	1.05561	0.607364	1.06315	1.06103	0.0722949	0.174257		0.934626	0.652219	0.927147	0.939343	0.13445	0.0152149		0.969883	0.0473173	0.0473173	0.964953	0.0153	0.045509
1.6193	1.05572	0.607205	1.06323	1.06143	0.0726244	0.174505		0.935817	0.652332	0.928375	0.939343	0.136781	0.0153259		0.969611	0.0471821	0.0469793	0.964016	0.0149577	0.0453378
1.6203	1.0555	0.607046	1.06294	1.06232	0.0735303	0.175147		0.935519	0.651996	0.927482	0.939343	0.137004	0.0146599		0.969475	0.0474526	0.0469793	0.965812	0.0148721	0.0452523
1.6213	1.05529	0.606675	1.06294	1.06276	0.075095	0.174455		0.934477	0.651662	0.926701	0.9389	0.132674	0.0152149		0.969407	0.0472498	0.0469793	0.965383	0.014701	0.0450811
1.6223	1.05497	0.606197	1.06266	1.06291	0.0755895	0.173812		0.934179	0.651438	0.925807	0.938677	0.127233	0.0161031		0.969272	0.0471821	0.046844	0.963328	0.0151289	0.0453378
1.6233	1.05476	0.605403	1.06216	1.06306	0.0769481	0.174059		0.934774	0.65088	0.926143	0.9389	0.125124	0.0168803		0.96887	0.0469793	0.0467764	0.962562	0.0153	0.0453378
1.6243	1.05445	0.604819	1.0616	1.06341	0.0752188	0.17401		0.935221	0.647754	0.926588	0.939788	0.127123	0.0165472		0.968938	0.0470469	0.0469793	0.9635	0.0153856	0.0453378
1.6253	1.05481	0.604872	1.06188	1.06385	0.0727481	0.173862		0.934924	0.64608	0.926924	0.940454	0.128011	0.0168801		0.968735	0.0469793	0.046844	0.965727	0.0152145	0.0450811
1.6263	1.05418	0.605561	1.06139	1.0635	0.0717595	0.173714		0.93537	0.645969	0.926924	0.940676	0.129787	0.0167692		0.969475	0.0469117	0.0464383	0.968125	0.0152145	0.0450811
1.6273	1.05354	0.60625	1.06033	1.06296	0.0718419	0.174257		0.935817	0.648871	0.927258	0.939899	0.129565	0.0161031		0.969475	0.0469793	0.0467088	0.96975	0.0151289	0.0454234
1.6283	1.0529	0.606622	1.0604	1.06271	0.0723771	0.174702		0.935667	0.652443	0.927371	0.939566	0.127234	0.015437		0.969006	0.0470469	0.0469117	0.970602	0.0143587	0.0453378
1.6293	1.05301	0.607417	1.06089	1.06271	0.073242	0.175246		0.935072	0.653894	0.927705	0.938566	0.122904	0.0149928		0.968667	0.0469793	0.046844	0.970945	0.014701	0.0450811
1.6303	1.05254	0.608371	1.06068	1.06227	0.0734479	0.175246		0.935519	0.653113	0.928039	0.939343	0.126457	0.0149928		0.969272	0.0469117	0.0467764	0.970008	0.0145298	0.0454234
1.6313	1.05306	0.608689	1.06096	1.06262	0.0730773	0.175097		0.936262	0.652777	0.928152	0.940454	0.135559	0.0143268		0.970426	0.0469117	0.0466412	0.968461	0.0145298	0.0455945
1.6323	1.0537	0.608317	1.06117	1.06266	0.0735715	0.174505		0.936114	0.654228	0.928264	0.941231	0.141112	0.0135496		0.971302	0.0467764	0.0466412	0.967094	0.0147866	0.0455945
1.6333	1.05428	0.607152	1.06153	1.06271	0.0752602	0.174208		0.93537	0.655345	0.927705	0.941564	0.138891	0.0142158		0.971778	0.0466412	0.046506	0.964867	0.0147866	0.0455945
1.6343	1.05365	0.606197	1.0611	1.06227	0.0750951	0.174257		0.935072	0.653336	0.927258	0.941564	0.13667	0.0141047		0.972383	0.046844	0.0465736	0.96307	0.0150433	0.0457657
1.6353	1.0528	0.605826	1.0604	1.06237	0.0749716	0.174405		0.93537	0.652107	0.927817	0.941009	0.134783	0.015548		0.971642	0.0469793	0.0467764	0.962391	0.0147009	0.0455945
1.6363	1.05317	0.605826	1.06026	1.06158	0.0743538	0.173862		0.934477	0.651438	0.928152	0.940454	0.132119	0.0156591		0.971099	0.0469117	0.0465736	0.962219	0.014701	0.0454234
1.6373	1.05338	0.604979	1.06033	1.06089	0.0747245	0.173664		0.933882	0.648312	0.927705	0.939232	0.132785	0.0152149		0.970827	0.0469117	0.046844	0.963328	0.014701	0.0453378
1.6383	1.05392	0.604819	1.06054	1.06143	0.074848	0.173664		0.93403	0.646303	0.927705	0.938788	0.135559	0.0137718		0.970562	0.0469117	0.046844	0.965383	0.0144442	0.0452523
1.6393	1.05445	0.604872	1.06103	1.06227	0.0750951	0.174011		0.934477	0.645969	0.927705	0.939788	0.138336	0.0135496		0.970494	0.0470469	0.0469117	0.967008	0.0149577	0.0452523
1.6403	1.05407	0.605297	1.06139	1.06252	0.0755068	0.174059		0.934477	0.648871	0.926254	0.940676	0.137004	0.0141047		0.969815	0.0469793	0.0469117	0.969578	0.0147866	0.0452523
1.6413	1.05386	0.605243	1.06181	1.06247	0.0764955	0.174159		0.935667	0.650433	0.927035	0.941453	0.134117	0.0148819		0.968259	0.0471145	0.0467088	0.970008	0.014701	0.0451666
1.6423	1.05455	0.604661	1.06237	1.06192	0.0775248	0.175097		0.937007	0.650768	0.927928	0.940009	0.133562	0.0149928		0.966704	0.0472498	0.0468441	0.968211	0.0152145	0.0449099
1.6433	1.05455	0.604979	1.06195	1.06192	0.0778128	0.175789		0.937007	0.651326	0.928375	0.940343	0.132008	0.0142157		0.966031	0.0469793	0.0469793	0.9665	0.0150433	0.0450811
1.6443	1.05402	0.605403	1.06139	1.06128	0.0775662	0.175048		0.937751	0.653113	0.928822	0.940231	0.13112	0.0129946		0.967315	0.0467764	0.0467088	0.964359	0.0147866	0.0454234
1.6453	1.05412	0.606357	1.06188	1.06138	0.0755887	0.174307		0.938496	0.654005	0.929937	0.939677	0.130786	0.0135496		0.968463	0.0469117	0.0467764	0.962477	0.0149577	0.0453378
1.6463	1.05445	0.606781	1.06188	1.06168	0.0750127	0.173961		0.938049	0.653558	0.929379	0.939232	0.130453	0.0141047		0.969074	0.0467088	0.0466412	0.961703	0.0151289	0.0453378
1.6473	1.0546	0.605774	1.0621	1.06197	0.0750539	0.174405		0.936859	0.651996	0.928375	0.939011	0.129232	0.0143268		0.968938	0.046844	0.0467088	0.962391	0.0147866	0.0453378
1.6483	1.05445	0.604766	1.06223	1.06217	0.0748892	0.17485		0.936412	0.650545	0.927928	0.938566	0.131563	0.0139936		0.969407	0.0469117	0.0466412	0.963672	0.0147866	0.0450811
1.6493	1.0545	0.604608	1.0623	1.06187	0.0751363	0.174998		0.935965	0.649764	0.927705	0.938234	0.136338	0.0146599		0.969883	0.0469793	0.0466412	0.964617	0.0152145	0.0450811
1.6503	1.05534	0.60519	1.0628	1.06128	0.0749304	0.174899		0.935072	0.651996	0.927147	0.9379	0.133562	0.0144378		0.970698	0.0470469	0.0467764	0.966156	0.0154712	0.0452523
1.6513	1.0554	0.606145	1.0628	1.06089	0.0743951	0.174405		0.935667	0.653447	0.927258	0.938677	0.134339	0.0141047		0.971642	0.0469793	0.0467088	0.96675	0.0152145	0.0451666
1.6523	1.05503	0.607046	1.06203	1.06068	0.0749305	0.174208		0.935817	0.653001	0.927817	0.938566	0.136004	0.0135496		0.972926	0.0467764	0.0465059	0.966156	0.0148721	0.0449955
1.6533	1.05445	0.607099	1.06132	1.06064	0.0760421	0.174405		0.935817	0.652332	0.928152	0.938455	0.134561	0.0136607		0.973333	0.0469117	0.0467088	0.966922	0.0146154	0.0449099
1.6543	1.05392	0.607205	1.06096	1.06083	0.0762895	0.174505		0.937304	0.653336	0.929268	0.937234	0.133007	0.0124395		0.97171	0.0471821	0.0467764	0.967867	0.0144443	0.0448244
1.6553	1.05349	0.60747	1.06054	1.06202	0.0749303	0.174998		0.937156	0.654564	0.929156	0.936791	0.132785	0.0122174		0.970494	0.0471145	0.0467764	0.968039	0.014273	0.0452523
1.6563	1.05344	0.607523	1.06054	1.06301	0.0738185	0.176184		0.937304	0.653447	0.929156	0.937345	0.132008	0.0126615		0.969883	0.0466412	0.0466412	0.969063	0.014102	0.0450811
1.6573	1.05365	0.607257	1.06146	1.06227	0.0727891	0.176283		0.936859	0.650992	0.928375	0.936901	0.130898	0.0128835		0.969272	0.0469793	0.0465736	0.968633	0.014102	0.0450811
1.6583	1.05349	0.607152	1.0616	1.06168	0.0724183	0.176086		0.93537	0.650322	0.927371	0.936791	0.131342	0.0136607		0.969272	0.0469117	0.0466412	0.968125	0.0142731	0.0450811
1.6593	1.0528	0.607152	1.06068	1.06128	0.071883	0.176382		0.933732	0.649094	0.926143	0.936901	0.132341	0.0142158		0.969611	0.0471145	0.0467088	0.968125	0.014102	0.0451666
1.6603	1.05285	0.606886	1.0604	1.06089	0.0724184	0.176382		0.933287	0.649317	0.925473	0.937678	0.134672	0.0143268		0.969679	0.0467764	0.0465736	0.96718	0.014102	0.0452523
1.6613	1.0537	0.607575	1.06047	1.06079	0.0736126	0.176382		0.932692	0.649875	0.925361	0.940009	0.137892	0.0133276		0.968938	0.0471145	0.0467088	0.967609	0.0141875	0.0451666
1.6623	1.05375	0.607894	1.06061	1.06098	0.0755481	0.176036		0.933435	0.65088	0.926365	0.940454	0.136781	0.0137716		0.968802	0.0469117	0.0467088	0.967523	0.014102	0.0451666
1.6633	1.05344	0.608053	1.06033	1.06118	0.0753008	0.17658		0.934924	0.650768	0.926588	0.94012	0.134783	0.0138827		0.969006	0.0468441	0.0467088	0.967008	0.0142731	0.0452523
1.6643	1.05344	0.607417	1.06068	1.06103	0.0753835	0.17653		0.935221	0.650768	0.925807	0.940454	0.133118	0.0126615		0.96887	0.0469117	0.0466412	0.96932	0.014102	0.0454234
1.6653	1.05349	0.607257	1.06125	1.06108	0.0752188	0.175542		0.934477	0.650433	0.924914	0.939677	0.131675	0.0133276		0.967852	0.0471822	0.0467764	0.971891	0.0138452	0.0450811
1.6663	1.05386	0.607152	1.0616	1.06148	0.0745186	0.175147		0.933882	0.650433	0.924356	0.938566	0.130786	0.0142158		0.967179	0.0472498	0.0469117	0.969836	0.0143587	0.0450811
1.6673	1.05392	0.606886	1.0616	1.06177	0.0741068	0.175394		0.934774	0.650322	0.925137	0.9379	0.130675	0.0149928		0.967722	0.0470469	0.0469117	0.967094	0.0147866	0.0453378
1.6683	1.05412	0.607257	1.06188	1.06177	0.0741891	0.175048		0.934477	0.650433	0.925918	0.938677	0.12901	0.0151039		0.96934	0.0470469	0.0467088	0.965984	0.0146154	0.0451666
1.6693	1.0545	0.606834	1.06167	1.06212	0.0740244	0.17485		0.93403	0.650098	0.92592	0.9389	0.126235	0.0154369		0.970222	0.0471821	0.0467764	0.965984	0.0149577	0.045509
1.6703	1.05402	0.606463	1.06096	1.06187	0.0729538	0.175246		0.933732	0.647978	0.925584	0.939011	0.129787	0.0146599		0.970222	0.0468441	0.0467764	0.965984	0.0148721	0.0454234
1.6713	1.05381	0.606463	1.06068	1.06054	0.0718008	0.17485		0.934477	0.646192	0.926031	0.939122	0.137447	0.0144378		0.969611	0.0470469	0.0466412	0.966242	0.0150433	0.0454234
1.6723	1.05375	0.607046	1.06068	1.06093	0.0726655	0.174159		0.935221	0.646192	0.926143	0.938345	0.141111	0.0137716		0.969272	0.0468441	0.0467088	0.966836	0.0149577	0.0456802
1.6733	1.05359	0.607523	1.06012	1.06089	0.072542	0.173467		0.935519	0.648535	0.926477	0.936791	0.138891	0.0137716		0.968463	0.0467764	0.0467088	0.967437	0.0149577	0.0452523
1.6743	1.05323	0.607257	1.05976	1.06005	0.0718008	0.173417		0.936262	0.650211	0.926924	0.936457	0.135561	0.0139938		0.968123	0.0471145	0.0467088	0.967266	0.0152145	0.0452523
1.6753	1.0527	0.607417	1.05934	1.05985	0.0727066	0.17322		0.936114	0.650992	0.927594	0.937123	0.133007	0.0149928		0.968056	0.0469117	0.0467088	0.968211	0.0151289	0.0453378
1.6763	1.05259	0.60747	1.05962	1.06029	0.0739009	0.174356		0.935817	0.651885	0.927371	0.937678	0.131786	0.0138827		0.968191	0.0465736	0.046506	0.967867	0.0150433	0.0453378
1.6773	1.05306	0.607311	1.05997	1.06024	0.0743127	0.175492		0.934774	0.652219	0.926813	0.937789	0.131231	0.0137716		0.968191	0.0469117	0.0463707	0.968461	0.014701	0.0453378
1.6783	1.05312	0.607364	1.06033	1.06044	0.0743539	0.175147		0.934179	0.651773	0.926143	0.937345	0.131231	0.0142158		0.968056	0.0470469	0.0468441	0.968547	0.0148722	0.0450811
1.6793	1.05317	0.607575	1.06054	1.06049	0.0737774	0.174455		0.935072	0.650433	0.926813	0.936678	0.132785	0.0144378		0.968802	0.0471145	0.0471145	0.969234	0.0147866	0.0450811
1.6803	1.05392	0.607682	1.06125	1.06093	0.0734891	0.173565		0.935221	0.649429	0.927035	0.935901	0.135561	0.0137718		0.97029	0.0473849	0.0471821	0.96975	0.0147866	0.0452523
1.6813	1.05397	0.607841	1.06146	1.06153	0.0730361	0.17317		0.934924	0.649094	0.926254	0.936124	0.13978	0.0138827		0.971438	0.0472498	0.0469117	0.970008	0.0147866	0.0452523
1.6823	1.05365	0.607364	1.06103	1.06177	0.0732008	0.173417		0.934626	0.649317	0.926031	0.936346	0.140778	0.0142158		0.971846	0.0471821	0.0469117	0.969406	0.0147866	0.0455945
1.6833	1.05434	0.60625	1.06181	1.06123	0.074848	0.172874		0.936114	0.649541	0.926701	0.936901	0.138336	0.0148819		0.970827	0.0468441	0.0468441	0.969406	0.0145298	0.0450811
1.6843	1.05503	0.605137	1.0623	1.06064	0.0756301	0.17322		0.936264	0.650879	0.927371	0.938122	0.133673	0.0139938		0.970154	0.0470469	0.0468441	0.968977	0.0145298	0.0452522
1.6853	1.05481	0.604979	1.06273	1.06024	0.0752188	0.173615		0.935817	0.651549	0.92737	0.939454	0.131119	0.0148819		0.969747	0.0471145	0.0470469	0.96932	0.0146154	0.0454234
1.6863	1.05476	0.60519	1.0623	1.05989	0.0742304	0.173664		0.934924	0.652107	0.926701	0.939566	0.130009	0.0152149		0.969543	0.0471821	0.0469117	0.969578	0.0143587	0.0451666
1.6873	1.05434	0.604555	1.06195	1.06034	0.0734892	0.174553		0.93537	0.652332	0.926924	0.938566	0.129454	0.014993		0.969272	0.0473173	0.0470469	0.968039	0.0146154	0.0454234
1.6883	1.05354	0.60429	1.06125	1.06098	0.0735714	0.175048		0.935667	0.650879	0.927371	0.937568	0.12901	0.0145488		0.968599	0.0474526	0.0471821	0.96607	0.0145298	0.045509
1.6893	1.05306	0.604343	1.06103	1.06162	0.0744362	0.175048		0.935072	0.649764	0.926924	0.937234	0.130786	0.01577		0.968938	0.0472498	0.0471821	0.966156	0.0144442	0.0452523
1.6903	1.0527	0.605614	1.06033	1.06187	0.0746009	0.175147		0.934626	0.648982	0.926701	0.937345	0.128677	0.014993		0.970154	0.0471145	0.0469793	0.967523	0.014102	0.0451666
1.6913	1.05195	0.606622	1.05948	1.06158	0.0734479	0.174949		0.934626	0.649652	0.926031	0.937789	0.127456	0.0143268		0.97063	0.0469793	0.0469117	0.968891	0.0142731	0.0450811
1.6923	1.05185	0.607311	1.05962	1.06123	0.0730773	0.174455		0.934924	0.651662	0.926143	0.937789	0.128122	0.0142157		0.969951	0.0469117	0.046844	0.96975	0.0142731	0.0449955
1.6933	1.05264	0.606781	1.05969	1.06064	0.074395	0.174257		0.934774	0.653336	0.926031	0.938677	0.128233	0.0141047		0.969407	0.0471145	0.046844	0.969148	0.0141875	0.0453378
1.6943	1.05285	0.605826	1.05962	1.06039	0.0761248	0.174208		0.934179	0.653224	0.92592	0.939454	0.128233	0.0154369		0.969543	0.0471822	0.0468441	0.969234	0.0141876	0.0453378
1.6953	1.05354	0.605297	1.06047	1.06068	0.0763714	0.174455		0.933732	0.651326	0.925361	0.938677	0.128233	0.0153259		0.968531	0.0471145	0.0469793	0.967008	0.0145298	0.0452523
1.6963	1.05412	0.604555	1.06103	1.06089	0.0750951	0.174109		0.933882	0.649429	0.924692	0.937789	0.128788	0.0147708		0.967722	0.0472498	0.0470469	0.964359	0.0144442	0.0454234
1.6973	1.05412	0.604555	1.06103	1.06138	0.0737774	0.174998		0.933882	0.648535	0.924245	0.937678	0.129898	0.0151038		0.968735	0.0473173	0.0470469	0.96282	0.0143587	0.0450811
1.6983	1.05397	0.60519	1.06103	1.06083	0.0735714	0.175097		0.934626	0.647084	0.924803	0.936457	0.130564	0.015215		0.969006	0.0472498	0.0470469	0.962898	0.0146154	0.0450811
1.6993	1.05397	0.606092	1.06103	1.06074	0.0729538	0.174949		0.934626	0.647754	0.924914	0.935901	0.131453	0.0147708		0.969272	0.0472498	0.0471821	0.961875	0.0146154	0.0447388
1.7003	1.05365	0.607205	1.06089	1.06108	0.073695	0.175344		0.934626	0.650879	0.92458	0.936791	0.129232	0.0143268		0.968395	0.0471145	0.0469117	0.960766	0.0147866	0.0450811
1.7013	1.05338	0.607946	1.0604	1.06148	0.073942	0.175789		0.933287	0.651885	0.92458	0.937345	0.127789	0.0147708		0.968259	0.0473173	0.0469793	0.960164	0.0147866	0.0451666
1.7023	1.05328	0.608795	1.06019	1.06172	0.0726655	0.17574		0.932989	0.652107	0.924692	0.938234	0.126679	0.0147708		0.968463	0.0469117	0.0468441	0.961789	0.0146154	0.0449955
1.7033	1.05317	0.608954	1.06005	1.06241	0.0720478	0.175295		0.93284	0.649986	0.924692	0.9389	0.127678	0.0146597		0.968599	0.0471145	0.0468441	0.964016	0.0149577	0.0451666
1.7043	1.05291	0.608106	1.06005	1.06247	0.0718418	0.175641		0.932245	0.64809	0.924022	0.937789	0.128566	0.0135496		0.968802	0.0469793	0.0466412	0.966664	0.0148721	0.0450811
1.7053	1.05291	0.607152	1.06005	1.06162	0.0723772	0.176086		0.931649	0.647084	0.923686	0.936014	0.129454	0.0129945		0.968463	0.0469117	0.0468441	0.96975	0.0147866	0.0450811
1.7063	1.05333	0.607575	1.06075	1.06118	0.0722948	0.17569		0.93269	0.646861	0.924692	0.934903	0.13012	0.0146599		0.968599	0.0469117	0.0466412	0.970688	0.0146154	0.0445677
1.7073	1.05328	0.607575	1.06061	1.06128	0.0725419	0.175444		0.933584	0.648312	0.925584	0.934792	0.129565	0.015215		0.968191	0.0471821	0.0469793	0.97018	0.0150433	0.0446532
1.7083	1.05312	0.607523	1.06068	1.06138	0.0735715	0.176036		0.934329	0.648535	0.925918	0.935458	0.128455	0.0145488		0.968938	0.0472498	0.0472498	0.96975	0.0148721	0.0451666
1.7093	1.05349	0.60747	1.06089	1.06083	0.0748892	0.175938		0.933287	0.64876	0.925361	0.935901	0.127789	0.0143268		0.969951	0.0472498	0.0471821	0.968891	0.0149577	0.0451666
1.7103	1.05338	0.608053	1.06075	1.0602	0.0761248	0.175196		0.932393	0.649875	0.924356	0.936678	0.125791	0.0147708		0.969951	0.0471145	0.0470469	0.968125	0.0149577	0.0449955
1.7113	1.05359	0.607099	1.06146	1.06039	0.0764541	0.174059		0.932095	0.650098	0.923686	0.936457	0.119795	0.0144378		0.968802	0.0470469	0.046844	0.96718	0.0151289	0.0454234
1.7123	1.05386	0.605826	1.0616	1.06029	0.0770308	0.173368		0.932542	0.650322	0.924133	0.935791	0.117797	0.0148819		0.967383	0.0469793	0.046844	0.967523	0.0149577	0.0453378
1.7133	1.05392	0.604926	1.06146	1.06074	0.0760008	0.173269		0.933732	0.648982	0.925473	0.935569	0.119796	0.0156589		0.967586	0.0470469	0.0469793	0.967953	0.0148722	0.0456801
1.7143	1.05344	0.604926	1.06082	1.06103	0.0756308	0.173615		0.933732	0.649986	0.925361	0.935014	0.122349	0.0149928		0.968395	0.0470469	0.0467764	0.966922	0.0150433	0.0456801
1.7153	1.05312	0.605455	1.06019	1.06153	0.0749716	0.174307		0.934179	0.650433	0.925584	0.936346	0.124459	0.015548		0.968191	0.0471145	0.0469117	0.966578	0.0151289	0.0454234
1.7163	1.05365	0.605986	1.06103	1.06148	0.0752602	0.174455		0.933732	0.651773	0.925361	0.936901	0.128788	0.015992		0.968802	0.0470469	0.0469117	0.965898	0.0152145	0.0457657
1.7173	1.05412	0.607363	1.06117	1.06158	0.0756714	0.174307		0.934924	0.651103	0.926254	0.938122	0.131897	0.0153259		0.970019	0.0474526	0.0469117	0.965555	0.0153	0.0457657
1.7183	1.0537	0.608371	1.0611	1.06089	0.0754654	0.174405		0.935221	0.650433	0.926254	0.938345	0.134339	0.0145488		0.970759	0.0470469	0.0469793	0.965898	0.0148721	0.0454234
1.7193	1.0537	0.607894	1.06103	1.06153	0.0745186	0.174208		0.93403	0.648647	0.925026	0.938677	0.135449	0.0142157		0.970963	0.0470469	0.0468441	0.964617	0.014701	0.0450811
1.7203	1.05397	0.607258	1.06082	1.06252	0.0739833	0.174603		0.933584	0.646303	0.924692	0.937568	0.129899	0.0138827		0.970827	0.0468441	0.0466412	0.963758	0.0150433	0.0450811
1.7213	1.05412	0.605986	1.06068	1.06266	0.0733655	0.174949		0.934327	0.64541	0.925473	0.937789	0.124902	0.0135496		0.970426	0.0470469	0.0467764	0.963414	0.0149577	0.0446532
1.7223	1.05386	0.605297	1.06068	1.06271	0.0732832	0.174751		0.935072	0.647643	0.925807	0.936791	0.125569	0.0128835		0.970562	0.0470469	0.0469117	0.9635	0.0149577	0.0447388
1.7233	1.05392	0.603759	1.06075	1.06222	0.0730773	0.174455		0.936709	0.649541	0.926588	0.93568	0.126124	0.0129946		0.970759	0.0471145	0.0469117	0.964445	0.0150433	0.0448244
1.7243	1.05423	0.602912	1.06089	1.06217	0.0726243	0.173961		0.938496	0.650656	0.927705	0.935235	0.1279	0.0134386		0.971031	0.0469793	0.0467088	0.964867	0.0152145	0.0453378
1.7253	1.05407	0.603441	1.06096	1.06187	0.0731185	0.173813		0.937751	0.651885	0.927928	0.935124	0.130231	0.0141047		0.971574	0.0467764	0.0467088	0.963672	0.0147866	0.0450811
1.7263	1.05349	0.604183	1.06075	1.06143	0.0742303	0.174208		0.936412	0.651885	0.927035	0.935791	0.131453	0.0137716		0.971778	0.0469793	0.0469793	0.963844	0.0150433	0.0449955
1.7273	1.05344	0.604661	1.06089	1.06158	0.0740244	0.174702		0.936412	0.651438	0.926924	0.935235	0.13223	0.0143269		0.971574	0.0471145	0.0467764	0.965039	0.0148721	0.0448243
1.7283	1.05349	0.604661	1.06089	1.06187	0.0732832	0.175147		0.936114	0.650433	0.927147	0.935124	0.133784	0.0139936		0.971167	0.0469793	0.0467764	0.965383	0.0146154	0.0449099
1.7293	1.05349	0.605085	1.06096	1.06172	0.0734479	0.175838		0.936264	0.649652	0.927482	0.935124	0.134117	0.0142157		0.970494	0.0472498	0.0469117	0.964781	0.0145298	0.0443965
1.7303	1.05301	0.605244	1.06075	1.06207	0.0736126	0.175986		0.935817	0.648982	0.927147	0.936124	0.130897	0.0141047		0.969679	0.0471145	0.046844	0.964445	0.0147866	0.0445676
1.7313	1.05328	0.605774	1.06089	1.06247	0.0732832	0.175641		0.935221	0.647977	0.927035	0.936568	0.128566	0.0141047		0.969747	0.0471145	0.0467088	0.964359	0.0148721	0.0445677
1.7323	1.05418	0.607046	1.06174	1.06237	0.072542	0.174702		0.935667	0.647196	0.927147	0.936791	0.126124	0.0136607		0.969142	0.0469793	0.0468441	0.965641	0.0147866	0.0446532
1.7333	1.05423	0.606781	1.06132	1.06202	0.0712242	0.174011		0.935072	0.646639	0.926813	0.935791	0.129343	0.0136607		0.969951	0.0469793	0.046844	0.967437	0.0148721	0.0449955
1.7343	1.05407	0.606092	1.06082	1.06183	0.0717184	0.17322		0.935072	0.64541	0.926031	0.935347	0.130898	0.0137716		0.970562	0.0471822	0.0469793	0.968547	0.0148722	0.0451666
1.7353	1.05365	0.605508	1.06125	1.06153	0.072789	0.173714		0.934774	0.645522	0.924692	0.935458	0.132008	0.0146599		0.970019	0.0471821	0.0469117	0.968719	0.0149577	0.0452523
1.7363	1.05344	0.605826	1.06096	1.06138	0.0748068	0.173813		0.93403	0.64541	0.923799	0.935235	0.131231	0.0139938		0.969679	0.0471145	0.0469793	0.968891	0.0151289	0.0455945
1.7373	1.05306	0.606463	1.06033	1.06217	0.0752602	0.173763		0.934477	0.646639	0.92391	0.935569	0.129787	0.0134386		0.970358	0.0472498	0.0470469	0.96932	0.0147009	0.045509
1.7383	1.05317	0.606834	1.06026	1.06262	0.0750127	0.17401		0.934774	0.647084	0.924914	0.935347	0.126013	0.0125504		0.970963	0.0471821	0.0469117	0.968383	0.0150433	0.045509
1.7393	1.05365	0.606728	1.06103	1.06286	0.0744774	0.17401		0.935072	0.64809	0.925807	0.935124	0.124125	0.0125504		0.971167	0.0469793	0.0467764	0.96675	0.0152145	0.0451666
1.7403	1.05434	0.606304	1.06188	1.06256	0.074148	0.173565		0.93537	0.649764	0.925473	0.935458	0.121572	0.0127725		0.970698	0.0469793	0.0465736	0.965125	0.0150433	0.045509
1.7413	1.05466	0.605774	1.0621	1.06183	0.0746421	0.173565		0.935221	0.650433	0.925696	0.935901	0.121239	0.0127725		0.970494	0.0466412	0.0463707	0.966836	0.0148721	0.0455945
1.7423	1.05486	0.605879	1.0621	1.06148	0.0759602	0.173813		0.933882	0.649875	0.924803	0.937678	0.121794	0.0135496		0.969747	0.0469117	0.0467764	0.968977	0.0147866	0.0456802
1.7433	1.05577	0.605986	1.06323	1.06089	0.0776481	0.173862		0.933584	0.646861	0.92458	0.937678	0.122016	0.0143268		0.96921	0.0470469	0.0468441	0.97043	0.0147009	0.0453378
1.7443	1.05545	0.60641	1.06252	1.06114	0.0766602	0.173763		0.932393	0.64541	0.92391	0.937234	0.122127	0.015215		0.969074	0.0469117	0.046844	0.972313	0.0144442	0.0453378
1.7453	1.05497	0.60625	1.06139	1.06123	0.0751363	0.174059		0.93284	0.644852	0.923799	0.937568	0.124125	0.0156591		0.968327	0.0468441	0.0469117	0.971805	0.0146154	0.045509
1.7463	1.05402	0.605986	1.0604	1.06123	0.0745186	0.174455		0.932692	0.64474	0.92391	0.937345	0.126346	0.015548		0.967852	0.0469793	0.046844	0.970094	0.0147009	0.0451667
1.7473	1.05301	0.606728	1.05962	1.06143	0.073695	0.174949		0.933584	0.645299	0.924692	0.937123	0.129232	0.0143268		0.967586	0.0471145	0.0469793	0.968891	0.0144442	0.0449955
1.7483	1.05296	0.607628	1.05997	1.06177	0.0741068	0.174208		0.933732	0.645075	0.925584	0.936457	0.130786	0.0129945		0.967519	0.0471822	0.0470469	0.968547	0.0144442	0.0453378
1.7493	1.05365	0.608	1.06082	1.06168	0.0750127	0.173565		0.934626	0.645188	0.925696	0.936346	0.129121	0.0128835		0.96792	0.0470469	0.0469117	0.969578	0.0148721	0.045509
1.7503	1.05344	0.607628	1.06054	1.06187	0.0750539	0.174059		0.934924	0.644852	0.925696	0.936678	0.128566	0.0137718		0.969278	0.0471145	0.0468441	0.971461	0.014701	0.045509
1.7513	1.05259	0.607788	1.05962	1.06187	0.0748068	0.174356		0.934477	0.647196	0.925807	0.936457	0.124125	0.0137716		0.97029	0.0472498	0.0469117	0.971547	0.0146154	0.0451666
1.7523	1.05216	0.607682	1.05905	1.06177	0.0743127	0.174899		0.934179	0.649986	0.925026	0.936568	0.120462	0.0135496		0.970494	0.0468441	0.0467764	0.970008	0.014701	0.0445677
1.7533	1.05222	0.607523	1.05892	1.06207	0.0727892	0.175394		0.933584	0.651549	0.924356	0.93568	0.120573	0.0145488		0.971506	0.0471145	0.0468441	0.968891	0.0149577	0.0448244
1.7543	1.05259	0.608053	1.05919	1.06296	0.0710594	0.175246		0.933435	0.649764	0.924133	0.935791	0.122682	0.0147708		0.972185	0.0469117	0.0467764	0.967266	0.0149577	0.0447388
1.7553	1.0528	0.608053	1.05919	1.06266	0.0708124	0.174949		0.933137	0.648201	0.924356	0.935347	0.125458	0.0148819		0.971981	0.0467764	0.0465736	0.965641	0.0148721	0.0446532
1.7563	1.05254	0.607841	1.05906	1.06183	0.0722125	0.17569		0.933584	0.64809	0.924022	0.935569	0.127012	0.0144377		0.972049	0.0467764	0.0464383	0.966156	0.014701	0.0450811
1.7573	1.05275	0.608636	1.05969	1.06168	0.0734892	0.176481		0.935221	0.650099	0.924914	0.935458	0.128344	0.0137716		0.97171	0.0467764	0.0463707	0.967523	0.0142731	0.044482
1.7583	1.0527	0.60906	1.05976	1.06177	0.0739832	0.176283		0.93537	0.652107	0.925137	0.934792	0.130231	0.0132166		0.972654	0.0468441	0.0465736	0.96675	0.014701	0.0449099
1.7593	1.05275	0.608954	1.06033	1.06118	0.0744362	0.17569		0.93403	0.651549	0.924692	0.934347	0.13334	0.0128835		0.972858	0.046844	0.0468441	0.967266	0.0149577	0.0451666
1.7603	1.05349	0.60853	1.06103	1.06024	0.0735714	0.176036		0.93269	0.64809	0.92391	0.935458	0.137115	0.0138827		0.971914	0.0469793	0.0467088	0.969063	0.0147866	0.0452523
1.7613	1.05386	0.608689	1.0611	1.06024	0.0733656	0.176184		0.931947	0.645857	0.924022	0.936678	0.134672	0.0151039		0.971914	0.0469793	0.0467088	0.970516	0.0145298	0.0452523
1.7623	1.05386	0.608848	1.06075	1.06068	0.0732008	0.175097		0.9315	0.645857	0.923352	0.936678	0.131675	0.0141047		0.972185	0.0469117	0.0466412	0.970602	0.0148721	0.0451666
1.7633	1.05349	0.608477	1.06068	1.06172	0.0724184	0.173911		0.930607	0.64608	0.922682	0.936235	0.131452	0.0143268		0.97171	0.046844	0.0467088	0.970688	0.0149577	0.0451666
1.7643	1.05301	0.608106	1.06054	1.06183	0.0715535	0.172726		0.930757	0.647865	0.922793	0.934681	0.131342	0.0148819		0.970019	0.0468441	0.0466412	0.971719	0.0149577	0.0452523
1.7653	1.05227	0.608212	1.05969	1.06162	0.0717183	0.172774		0.930458	0.648424	0.922793	0.93357	0.130676	0.0143268		0.969074	0.0467764	0.046506	0.97043	0.0147866	0.0451666
1.7663	1.0519	0.609378	1.05926	1.06114	0.0723772	0.174158		0.930757	0.649094	0.922571	0.934126	0.130231	0.0143268		0.969074	0.0467764	0.0465736	0.970859	0.0149577	0.0449955
1.7673	1.05179	0.609537	1.05941	1.06197	0.0725008	0.175344		0.930757	0.648871	0.923129	0.934681	0.129232	0.0126614		0.96921	0.0466412	0.0464383	0.97018	0.0150433	0.0452523
1.7683	1.05264	0.608583	1.05962	1.06207	0.0736538	0.174949		0.931798	0.647643	0.92391	0.935347	0.126346	0.0122174		0.969006	0.0466412	0.0465736	0.96975	0.0145298	0.0449099
1.7693	1.05254	0.608318	1.05941	1.06237	0.0743126	0.174505		0.93269	0.647084	0.924022	0.936124	0.120573	0.0126614		0.969543	0.0467764	0.0465059	0.967953	0.014701	0.0447388
1.7703	1.0527	0.608795	1.05955	1.06162	0.0738185	0.174109		0.933584	0.64608	0.92391	0.936791	0.118574	0.0134386		0.970019	0.0468441	0.0465736	0.967008	0.0145298	0.0449955
1.7713	1.05333	0.608742	1.05997	1.06148	0.0725008	0.174356		0.93284	0.645969	0.923575	0.937012	0.124236	0.0143268		0.969543	0.0466412	0.0465736	0.966836	0.0148721	0.0449099
1.7723	1.05439	0.607682	1.06096	1.06168	0.0714713	0.173714		0.932393	0.647308	0.922793	0.938122	0.128455	0.0143268		0.968599	0.0469117	0.0467764	0.968633	0.0146154	0.0450811
1.7733	1.05508	0.607257	1.06146	1.06192	0.0715948	0.174505		0.9315	0.649094	0.922124	0.937123	0.131675	0.0136607		0.968463	0.0470469	0.0465736	0.969406	0.0144442	0.0450811
1.7743	1.05492	0.607523	1.06132	1.06192	0.0720889	0.175147		0.931649	0.64876	0.922459	0.936346	0.132119	0.0144378		0.968056	0.0469793	0.0464383	0.969406	0.0143587	0.0449099
1.7753	1.05445	0.607099	1.06047	1.06237	0.0726655	0.175147		0.931649	0.647754	0.923352	0.93568	0.133007	0.0144378		0.968123	0.0469117	0.046844	0.969148	0.0143587	0.0447388
1.7763	1.05338	0.606515	1.05976	1.06311	0.073942	0.174603		0.931798	0.647754	0.923575	0.934792	0.133007	0.0136607		0.968599	0.0469117	0.0466412	0.969234	0.0147866	0.0449099
1.7773	1.05306	0.607257	1.05962	1.06252	0.0751363	0.174405		0.931798	0.647978	0.92324	0.935569	0.131231	0.0141047		0.970698	0.0469793	0.0467088	0.969664	0.0148722	0.0447388
1.7783	1.05338	0.607894	1.05997	1.06153	0.0750128	0.174405		0.931054	0.647754	0.922682	0.93568	0.130454	0.0142157		0.971574	0.046844	0.0465736	0.968805	0.0151289	0.0447388
1.7793	1.05397	0.607946	1.06068	1.06079	0.0753008	0.174059		0.931352	0.647084	0.922682	0.934458	0.132563	0.0143268		0.970827	0.0467764	0.046844	0.968633	0.0152145	0.0449099
1.7803	1.05381	0.606993	1.06103	1.06044	0.0732007	0.174751		0.931054	0.648647	0.923016	0.934126	0.136338	0.0147708		0.969951	0.0468441	0.0465736	0.968383	0.0151289	0.0453378
1.7813	1.05365	0.60625	1.06096	1.06024	0.0711006	0.174801		0.930905	0.650433	0.922124	0.934126	0.137115	0.0148819		0.96887	0.0467764	0.0466412	0.967523	0.0147866	0.0455945
1.7823	1.05354	0.605774	1.06061	1.06103	0.0699888	0.173763		0.93031	0.651215	0.921342	0.934569	0.135782	0.0144378		0.969611	0.046844	0.0467764	0.967266	0.0148721	0.0452523
1.7833	1.05285	0.605986	1.0599	1.06143	0.0727068	0.17322		0.930905	0.649875	0.921231	0.935458	0.13545	0.015437		0.970827	0.0467088	0.0465059	0.967695	0.0149577	0.0451666
1.7843	1.05237	0.605879	1.05926	1.06039	0.0735303	0.17317		0.931798	0.647865	0.921678	0.935791	0.133562	0.0149928		0.971778	0.0466412	0.0463707	0.967867	0.0147866	0.0450811
1.7853	1.05232	0.606039	1.05877	1.06039	0.0733656	0.172774		0.93284	0.646973	0.923463	0.936235	0.131342	0.0144378		0.971642	0.0467088	0.0465736	0.967781	0.0144443	0.0450811
1.7863	1.0528	0.605933	1.05955	1.06153	0.0728714	0.173565		0.933584	0.647977	0.924356	0.936901	0.128566	0.0127726		0.971302	0.0468441	0.0465736	0.964953	0.0144443	0.0451666
1.7873	1.05344	0.606622	1.06068	1.06252	0.0733656	0.173516		0.933584	0.648201	0.924133	0.935901	0.127678	0.0123284		0.971235	0.0469117	0.0468441	0.966586	0.014701	0.0452523
1.7883	1.05344	0.606622	1.06068	1.06296	0.0734479	0.173961		0.933287	0.647643	0.924133	0.935569	0.130009	0.0123284		0.97063	0.0469117	0.0469793	0.967609	0.0145298	0.0453378
1.7893	1.05317	0.607046	1.0604	1.06296	0.0736538	0.174553		0.93284	0.647531	0.923799	0.93457	0.135005	0.0135496		0.970963	0.0471145	0.0468441	0.967437	0.0145298	0.0455945
1.7903	1.05301	0.606993	1.0604	1.06326	0.0748069	0.173417		0.933435	0.647754	0.92391	0.934569	0.134672	0.0142158		0.971574	0.0471822	0.0469793	0.967609	0.0141875	0.0456802
1.7913	1.05296	0.606304	1.06082	1.06281	0.0751363	0.172429		0.933584	0.647754	0.924692	0.934903	0.128344	0.0149928		0.971438	0.0470469	0.0468441	0.967523	0.0141875	0.0457657
1.7923	1.0527	0.605508	1.06019	1.06148	0.0741068	0.17238		0.933435	0.647978	0.92391	0.935014	0.125791	0.0145488		0.970358	0.0468441	0.0468441	0.968297	0.0147866	0.0457657
1.7933	1.0527	0.605403	1.06012	1.06123	0.0727065	0.172528		0.932542	0.649317	0.923799	0.934681	0.125568	0.0137716		0.969679	0.0467764	0.0465736	0.969922	0.0143587	0.0455945
1.7943	1.05344	0.605933	1.06054	1.06138	0.0715124	0.172577		0.93269	0.652443	0.924356	0.93457	0.125569	0.0142158		0.969679	0.0468441	0.0467088	0.971375	0.014701	0.0455945
1.7953	1.05407	0.606092	1.06089	1.06143	0.0710595	0.173565		0.93284	0.653224	0.924245	0.935569	0.126235	0.0144377		0.969272	0.0470469	0.0469793	0.972914	0.014701	0.0454234
1.7963	1.05418	0.606145	1.0611	1.06237	0.0711831	0.174208		0.932245	0.651996	0.924356	0.935347	0.127789	0.0147708		0.969475	0.0470469	0.0469793	0.975484	0.0147866	0.0453378
1.7973	1.05407	0.606304	1.06139	1.06262	0.0720066	0.174257		0.932989	0.650322	0.925137	0.935347	0.129343	0.0148819		0.969679	0.0472498	0.0471145	0.974539	0.0148721	0.0452523
1.7983	1.05359	0.606092	1.06125	1.06252	0.0728302	0.173714		0.932989	0.648201	0.924692	0.935347	0.129676	0.0152149		0.971302	0.0472498	0.0470469	0.972313	0.0149577	0.0454234
1.7993	1.05338	0.606781	1.06117	1.06286	0.0740244	0.173862		0.932989	0.646527	0.92391	0.935901	0.128566	0.0167691		0.972858	0.0470469	0.0468441	0.968039	0.0149577	0.0454234
1.8003	1.05338	0.607046	1.06075	1.06311	0.0743539	0.174405		0.933287	0.648647	0.923799	0.936346	0.128677	0.0168803		0.974481	0.0470469	0.0468441	0.965125	0.0148722	0.045509
1.8013	1.0537	0.606145	1.06054	1.06306	0.074601	0.174505		0.933287	0.648871	0.923463	0.936791	0.127789	0.0158811		0.974346	0.0469793	0.0467764	0.965125	0.014701	0.045509
1.8023	1.05365	0.606145	1.06033	1.06237	0.0743951	0.174653		0.932989	0.648201	0.92324	0.93568	0.127789	0.0151039		0.973469	0.0468441	0.0466412	0.965211	0.0146154	0.0454234
1.8033	1.05312	0.606092	1.06005	1.06266	0.0744774	0.174109		0.932393	0.649541	0.923129	0.935569	0.126901	0.0147708		0.972586	0.0469117	0.0467764	0.965469	0.0146154	0.0449955
1.8043	1.05248	0.606039	1.05983	1.06247	0.0739009	0.173615		0.932095	0.649541	0.923129	0.933904	0.12901	0.0142157		0.972049	0.0468441	0.0465736	0.96282	0.0147866	0.0453378
1.8053	1.05195	0.605826	1.05899	1.06237	0.0729538	0.172626		0.932245	0.648871	0.923352	0.934015	0.130009	0.0136607		0.97171	0.0465736	0.0465736	0.962133	0.014701	0.0452523
1.8063	1.05216	0.605721	1.05962	1.06241	0.0713477	0.172726		0.931798	0.64876	0.924022	0.933792	0.130898	0.0133275		0.971031	0.0468441	0.0466412	0.962219	0.0150434	0.0453378
1.8073	1.05291	0.605297	1.06082	1.06148	0.0710183	0.173615		0.930012	0.64675	0.922346	0.933904	0.132119	0.0138827		0.970426	0.0469793	0.0467764	0.963844	0.0152145	0.0452523
1.8083	1.05392	0.604926	1.06216	1.06114	0.0718419	0.175641		0.929268	0.644182	0.922012	0.935014	0.133784	0.0132166		0.969475	0.0467764	0.0467764	0.965297	0.0151289	0.045509
1.8093	1.05428	0.604926	1.06308	1.06138	0.0731184	0.175986		0.930012	0.644629	0.922235	0.935791	0.134339	0.0139936		0.968667	0.0469793	0.0466412	0.968125	0.0150433	0.0452523
1.8103	1.0546	0.605297	1.0633	1.06202	0.074601	0.175789		0.93016	0.64809	0.922905	0.936235	0.140223	0.0142158		0.968735	0.0471822	0.0470469	0.971977	0.0151288	0.0452523
1.8113	1.05434	0.60641	1.06294	1.06207	0.0746421	0.175492		0.93016	0.650098	0.922571	0.936014	0.146218	0.0153259		0.969407	0.0471821	0.047385	0.97343	0.0152145	0.0453378
1.8123	1.05386	0.607152	1.06216	1.06148	0.0743127	0.175246		0.929417	0.650099	0.921678	0.93568	0.145774	0.0161031		0.968938	0.0473173	0.0472498	0.971891	0.0148722	0.0449099
1.8133	1.05344	0.607099	1.0616	1.06078	0.0736126	0.17485		0.93031	0.648982	0.922348	0.936124	0.141445	0.0166582		0.968735	0.0471821	0.0471821	0.96975	0.0150433	0.0450811
1.8143	1.0537	0.607575	1.06153	1.06089	0.0733244	0.174801		0.931054	0.649541	0.923016	0.935458	0.137558	0.0149928		0.969006	0.0470469	0.0467764	0.968977	0.0148721	0.0451666
1.8153	1.05428	0.608159	1.0621	1.06158	0.0738185	0.174801		0.9315	0.650098	0.923016	0.93568	0.133562	0.0146599		0.968531	0.0469793	0.046844	0.967953	0.0153	0.0451666
1.8163	1.05381	0.608583	1.06181	1.06202	0.0735714	0.174801		0.930757	0.650098	0.922571	0.936457	0.130786	0.0148819		0.967988	0.0469793	0.0467764	0.967781	0.0147866	0.0451667
1.8173	1.05375	0.608477	1.06181	1.06222	0.0729949	0.174751		0.930607	0.650768	0.922124	0.93568	0.131453	0.0147708		0.96792	0.0470469	0.0467764	0.968211	0.0143587	0.0452523
1.8183	1.05412	0.608159	1.06188	1.06241	0.073695	0.174109		0.930458	0.651326	0.922124	0.934792	0.132896	0.0156589		0.96934	0.0469793	0.0467088	0.970344	0.0142731	0.0447388
1.8193	1.05354	0.607311	1.06132	1.06281	0.0742304	0.17312		0.930607	0.651103	0.922124	0.934903	0.132341	0.0153259		0.970895	0.0469793	0.0467764	0.970266	0.0143587	0.0449099
1.8203	1.05301	0.606357	1.06047	1.06247	0.0744362	0.173813		0.931202	0.650545	0.923018	0.935347	0.130675	0.0147708		0.972451	0.0468441	0.0465736	0.969492	0.014701	0.0450811
1.8213	1.0528	0.605508	1.06075	1.06153	0.0740656	0.17401		0.932245	0.649205	0.923686	0.935569	0.129787	0.0142157		0.973537	0.046844	0.0465736	0.970008	0.0143587	0.0449955
1.8223	1.05275	0.604872	1.06033	1.06138	0.0735304	0.173516		0.932393	0.646414	0.92324	0.934681	0.129454	0.0138828		0.972994	0.0469117	0.0467088	0.970859	0.0142731	0.0451666
1.8233	1.05243	0.60535	1.06005	1.06138	0.0734479	0.172676		0.932095	0.643067	0.923016	0.935569	0.12901	0.0139936		0.972247	0.0469117	0.0465736	0.96932	0.0147866	0.0450811
1.8243	1.05296	0.606092	1.0604	1.06079	0.0735303	0.172577		0.931054	0.641168	0.922793	0.935014	0.131786	0.0138827		0.972117	0.0470469	0.0469117	0.968719	0.0149577	0.0451666
1.8253	1.05359	0.606622	1.06047	1.06089	0.074395	0.173071		0.931649	0.63994	0.923016	0.934015	0.134117	0.0143268		0.972858	0.0469793	0.046844	0.969578	0.0144442	0.0454234
1.8263	1.05354	0.607311	1.06089	1.06123	0.0747245	0.173318		0.932245	0.640052	0.923799	0.934903	0.133451	0.0146599		0.973537	0.0470469	0.0467088	0.967437	0.0147866	0.0451666
1.8273	1.05423	0.608371	1.0621	1.06158	0.074395	0.173368		0.931947	0.642173	0.923352	0.934792	0.133895	0.0141047		0.973062	0.0469117	0.0465736	0.967953	0.0144442	0.0450811
1.8283	1.05481	0.607946	1.0628	1.06168	0.0744362	0.173368		0.932095	0.64608	0.922905	0.934903	0.133895	0.0129945		0.97171	0.0467764	0.0466412	0.969578	0.0147866	0.0451666
1.8293	1.05481	0.607257	1.06273	1.06247	0.0746422	0.173615		0.930905	0.648648	0.922905	0.934903	0.131453	0.0128835		0.971167	0.0467764	0.0465059	0.970945	0.014701	0.0449955
1.8303	1.05428	0.606993	1.06174	1.06262	0.0746833	0.173318		0.930458	0.649652	0.922571	0.934569	0.128344	0.0132165		0.970759	0.0470469	0.0467764	0.970008	0.0146154	0.0451666
1.8313	1.0537	0.606622	1.06153	1.06237	0.0745598	0.173269		0.930607	0.651215	0.921678	0.934347	0.125569	0.0132166		0.97029	0.0470469	0.0470469	0.969922	0.0142731	0.0452523
1.8323	1.05397	0.605933	1.06139	1.06192	0.0742715	0.17317		0.930757	0.651773	0.92112	0.932793	0.125014	0.0135496		0.970019	0.0469793	0.0469117	0.968891	0.0146154	0.045509
1.8333	1.05344	0.605137	1.06082	1.06108	0.0737362	0.173565		0.931649	0.650545	0.922012	0.932682	0.124902	0.0135496		0.969679	0.0470469	0.0467764	0.967094	0.0146154	0.0451666
1.8343	1.0528	0.605137	1.05962	1.06172	0.0726243	0.174257		0.932245	0.646861	0.922682	0.933015	0.126124	0.0128835		0.971438	0.0469117	0.0467764	0.965383	0.0145298	0.0452523
1.8353	1.05296	0.605085	1.05962	1.06202	0.0725831	0.174208		0.931947	0.644406	0.922571	0.932682	0.127789	0.0141047		0.971981	0.0469117	0.046506	0.964016	0.0149577	0.0452523
1.8363	1.05291	0.604766	1.05983	1.06168	0.0733656	0.174505		0.932095	0.644629	0.922793	0.932461	0.129787	0.015215		0.972383	0.0469117	0.0465736	0.963242	0.0146154	0.0450811
1.8373	1.05291	0.60535	1.05969	1.06128	0.0742715	0.175147		0.932393	0.646303	0.922793	0.933127	0.130231	0.015548		0.972315	0.0469117	0.0467764	0.962562	0.0146154	0.0450811
1.8383	1.05328	0.606621	1.05997	1.06123	0.0753835	0.175789		0.932542	0.647196	0.923352	0.933681	0.129676	0.0154369		0.971981	0.0472498	0.0470469	0.962648	0.014701	0.0448244
1.8393	1.05344	0.607205	1.06033	1.06153	0.0753421	0.175888		0.932245	0.646527	0.92324	0.933792	0.126789	0.0151039		0.972049	0.0473173	0.0470469	0.964102	0.0149577	0.0450811
1.8403	1.05365	0.607046	1.0604	1.06207	0.0746421	0.175196		0.930607	0.646973	0.922012	0.934458	0.131675	0.015548		0.97171	0.0470469	0.0468441	0.965211	0.0152145	0.0450811
1.8413	1.05301	0.607311	1.05941	1.06237	0.0743539	0.17485		0.929417	0.647643	0.920784	0.93457	0.135672	0.0162141		0.970759	0.0471145	0.0470469	0.967266	0.0149577	0.0453378
1.8423	1.05291	0.607523	1.05969	1.06321	0.0741891	0.175344		0.930012	0.647977	0.920897	0.934681	0.13445	0.0161031		0.969611	0.0469793	0.0467764	0.968211	0.0151288	0.0450811
1.8433	1.05291	0.608318	1.06019	1.06291	0.072995	0.175592		0.93016	0.646861	0.921454	0.934347	0.131786	0.015992		0.970222	0.0469117	0.046844	0.968977	0.0147866	0.0448244
1.8443	1.0527	0.608	1.06012	1.06217	0.0724595	0.175938		0.93031	0.644963	0.921789	0.933459	0.130231	0.01577		0.970963	0.0471821	0.0469117	0.966664	0.0144443	0.0447388
1.8453	1.0528	0.608	1.05997	1.06177	0.0731596	0.175592		0.93031	0.643625	0.921901	0.932461	0.130564	0.014993		0.971846	0.0469793	0.0469117	0.965898	0.0143587	0.0448244
1.8463	1.05227	0.607575	1.05926	1.06197	0.0734479	0.175295		0.930458	0.644852	0.921678	0.932349	0.130787	0.0144377		0.972117	0.0470469	0.0467764	0.964867	0.0145298	0.0448244
1.8473	1.05174	0.606728	1.05863	1.06266	0.0728714	0.175295		0.93031	0.645969	0.921789	0.932793	0.131675	0.0137716		0.972179	0.0468441	0.0467088	0.966414	0.0144442	0.0451666
1.8483	1.05137	0.605933	1.05835	1.06306	0.0724596	0.175196		0.930458	0.646973	0.921789	0.933349	0.131342	0.0144377		0.971914	0.0469117	0.0467088	0.967695	0.0146154	0.045509
1.8493	1.05169	0.605774	1.05856	1.0636	0.073448	0.175987		0.93016	0.648871	0.921678	0.933793	0.1279	0.0148819		0.972185	0.0469793	0.0467088	0.96607	0.014701	0.0448244
1.8503	1.05179	0.606886	1.05856	1.06311	0.0743539	0.176629		0.930458	0.64742	0.92112	0.934792	0.126235	0.0142157		0.972117	0.0470469	0.0467764	0.963414	0.0148721	0.0449099
1.8513	1.05222	0.607046	1.05912	1.06276	0.0739421	0.177025		0.930905	0.645522	0.922012	0.934458	0.126235	0.0132166		0.972519	0.0470469	0.0467088	0.963844	0.014701	0.0451666
1.8523	1.0528	0.606622	1.06026	1.06232	0.0745598	0.175492		0.931054	0.64541	0.922012	0.933792	0.125346	0.0146599		0.972519	0.0470469	0.0465736	0.966586	0.014701	0.0450811
1.8533	1.05349	0.605615	1.0611	1.06207	0.0767015	0.174801		0.930607	0.647308	0.921678	0.933681	0.126013	0.0156591		0.972858	0.0469117	0.046506	0.969063	0.0150433	0.0452523
1.8543	1.05381	0.605774	1.06125	1.06128	0.0783895	0.175048		0.93016	0.650992	0.921565	0.933459	0.128122	0.0153259		0.972994	0.0468441	0.0465736	0.968547	0.0144443	0.0450811
1.8553	1.05423	0.605826	1.06153	1.06068	0.0781429	0.175641		0.930458	0.652443	0.921789	0.933681	0.130342	0.0145488		0.972926	0.0468441	0.0464383	0.96675	0.014701	0.0451666
1.8563	1.05397	0.606515	1.06146	1.06083	0.0765361	0.175888		0.931649	0.651438	0.923129	0.934681	0.131786	0.0146599		0.972383	0.0469117	0.0466412	0.967867	0.0146154	0.0450811
1.8573	1.05381	0.607257	1.06117	1.06128	0.075054	0.175838		0.932095	0.649986	0.923018	0.934792	0.132896	0.0142157		0.971235	0.0469117	0.0466412	0.968977	0.0146154	0.0452523
1.8583	1.05375	0.607046	1.06082	1.06177	0.0738598	0.175295		0.931649	0.649205	0.922459	0.93457	0.13223	0.0139936		0.97029	0.0469793	0.0465736	0.96975	0.0150433	0.0454234
1.8593	1.05338	0.606197	1.06054	1.06162	0.073036	0.174505		0.930757	0.648535	0.921789	0.933792	0.131008	0.0142158		0.970154	0.0470469	0.0468441	0.969922	0.0151289	0.0449099
1.8603	1.05354	0.605615	1.06033	1.06143	0.0737362	0.174653		0.931352	0.649205	0.922682	0.933015	0.134228	0.0151039		0.970963	0.0472498	0.0468441	0.97018	0.0151289	0.0448244
1.8613	1.05365	0.60535	1.06019	1.06158	0.0734067	0.174307		0.931352	0.649986	0.923575	0.932349	0.136004	0.015548		0.972519	0.0470469	0.0469793	0.968633	0.0150433	0.0449955
1.8623	1.05365	0.605879	1.06026	1.06217	0.0734067	0.174257		0.931054	0.649652	0.922905	0.931795	0.134561	0.015548		0.973537	0.0471822	0.0468441	0.968547	0.0150433	0.0448244
1.8633	1.05359	0.607099	1.06047	1.06252	0.0733656	0.174307		0.930458	0.649541	0.922905	0.93135	0.133784	0.0146599		0.972858	0.0470469	0.0466412	0.968633	0.0148721	0.0448244
1.8643	1.05412	0.606993	1.06125	1.06222	0.0729126	0.174159		0.930757	0.651438	0.923016	0.932016	0.131897	0.0147708		0.971235	0.0468441	0.0467088	0.969063	0.0148721	0.0448244
1.8653	1.05471	0.606304	1.06195	1.06222	0.0719655	0.17401		0.931054	0.652219	0.92324	0.932127	0.131786	0.0153259		0.969951	0.0469117	0.0467764	0.969836	0.0146155	0.0447388
1.8663	1.05466	0.606145	1.0616	1.06158	0.0713065	0.17401		0.9315	0.650879	0.923352	0.933015	0.131564	0.0152149		0.970019	0.046844	0.0465736	0.971117	0.0146154	0.0449955
1.8673	1.05445	0.606092	1.06139	1.06103	0.0713889	0.173615		0.931054	0.649652	0.922682	0.932349	0.132785	0.0143268		0.970895	0.0469793	0.0467764	0.971977	0.014701	0.0448244
1.8683	1.05439	0.606197	1.06139	1.06093	0.0719242	0.173071		0.930905	0.64809	0.922793	0.932793	0.133007	0.0136607		0.970895	0.0471145	0.0469117	0.97257	0.0148721	0.0449955
1.8693	1.05317	0.605879	1.06096	1.06108	0.072542	0.173417		0.930905	0.648312	0.922348	0.932238	0.129676	0.0128835		0.971031	0.0471822	0.0468441	0.972742	0.0147866	0.0453378
1.8703	1.0519	0.605615	1.0599	1.06103	0.0731596	0.17401		0.931798	0.647084	0.92324	0.931905	0.134339	0.0129945		0.971642	0.0471821	0.0469117	0.974109	0.014701	0.0454234
1.8713	1.05137	0.606145	1.05941	1.06103	0.0734891	0.174208		0.931202	0.646414	0.922682	0.931572	0.143997	0.0138826		0.971846	0.0471822	0.0467764	0.973258	0.014701	0.0454234
1.8723	1.05095	0.605668	1.05877	1.06128	0.0745598	0.174505		0.931649	0.645857	0.923018	0.931572	0.149438	0.0146599		0.971574	0.0470469	0.0469117	0.972484	0.0149577	0.0453378
1.8733	1.051	0.605986	1.05849	1.06133	0.0769895	0.174553		0.931054	0.643959	0.922459	0.932349	0.145664	0.0154369		0.970494	0.0471145	0.046844	0.970008	0.0149577	0.0454234
1.8743	1.05126	0.606039	1.05835	1.06093	0.0775248	0.174307		0.931798	0.645075	0.922571	0.931461	0.141223	0.0149928		0.968259	0.0468441	0.046506	0.970008	0.0150433	0.0456802
1.8753	1.05158	0.605826	1.05912	1.06039	0.0767835	0.173368		0.930757	0.645188	0.921789	0.931795	0.134894	0.0148819		0.96684	0.0469117	0.0465736	0.969406	0.014701	0.0458513
1.8763	1.05163	0.605297	1.05912	1.06083	0.0764128	0.172528		0.930757	0.645857	0.921678	0.932127	0.132896	0.0147708		0.96684	0.0467088	0.046506	0.967867	0.0147866	0.0456802
1.8773	1.05142	0.60535	1.05885	1.06079	0.0753421	0.172478		0.929417	0.64541	0.92112	0.932682	0.130676	0.0147708		0.967111	0.0469117	0.0467764	0.967266	0.014701	0.0458513
1.8783	1.05201	0.605244	1.05941	1.06089	0.0744774	0.172478		0.929268	0.645188	0.92112	0.933015	0.128455	0.0141047		0.968123	0.0471145	0.0468441	0.967867	0.014102	0.0452523
1.8793	1.05227	0.605137	1.06012	1.06177	0.0743538	0.172972		0.929268	0.64675	0.921008	0.931905	0.126679	0.0133276		0.969883	0.0472498	0.0468441	0.967008	0.014102	0.0452523
1.8803	1.05275	0.604501	1.06047	1.06172	0.0762895	0.172923		0.929268	0.649541	0.920784	0.931572	0.123792	0.0139936		0.971167	0.0471821	0.0470469	0.965039	0.0142731	0.045509
1.8813	1.05317	0.604237	1.06103	1.06153	0.0776068	0.173615		0.929417	0.65088	0.921008	0.931795	0.121683	0.0146599		0.97137	0.0473173	0.0471145	0.964953	0.014102	0.0455945
1.8823	1.05328	0.604448	1.06103	1.06114	0.0790075	0.173318		0.93016	0.651549	0.920784	0.931572	0.123015	0.0146599		0.972858	0.0471145	0.0469793	0.967867	0.0141875	0.0456802
1.8833	1.05291	0.605244	1.06026	1.06143	0.0795835	0.173565		0.930757	0.652443	0.921342	0.932682	0.124125	0.0151039		0.973401	0.0471821	0.0469793	0.969406	0.0145298	0.045509
1.8843	1.05243	0.605721	1.05934	1.06068	0.0781429	0.174059		0.931352	0.653113	0.921565	0.932127	0.127456	0.0153259		0.97313	0.0471822	0.0469793	0.969922	0.0147866	0.045509
1.8853	1.05227	0.605297	1.05892	1.0602	0.0769481	0.174455		0.931798	0.652332	0.922235	0.932238	0.129343	0.0148818		0.972117	0.0471145	0.0471145	0.969148	0.0146154	0.0454234
1.8863	1.05306	0.605137	1.05976	1.06024	0.0762895	0.174356		0.930905	0.651438	0.921901	0.931905	0.131342	0.0144378		0.971642	0.0471145	0.046844	0.967352	0.0150433	0.0452523
1.8873	1.05349	0.605933	1.06047	1.06078	0.0756714	0.174505		0.92912	0.649764	0.92112	0.932016	0.132119	0.0139938		0.971642	0.0470469	0.0466412	0.967695	0.0152145	0.0452523
1.8883	1.05349	0.607681	1.06089	1.06029	0.0751363	0.173417		0.928375	0.648535	0.920227	0.932349	0.134006	0.0133276		0.972247	0.0467764	0.0465736	0.969148	0.0153001	0.0455945
1.8893	1.05296	0.608583	1.06089	1.05995	0.0742715	0.172972		0.92897	0.646861	0.92112	0.931905	0.13334	0.0139936		0.973265	0.0468441	0.046506	0.971117	0.0150433	0.045509
1.8903	1.05275	0.608212	1.06061	1.05999	0.0736126	0.173664		0.929417	0.646973	0.921008	0.931682	0.128344	0.0136607		0.97313	0.0469117	0.0463031	0.971203	0.0149577	0.0450811
1.8913	1.05248	0.607894	1.06019	1.06024	0.0732009	0.174998		0.931054	0.647308	0.922124	0.932682	0.123903	0.0139936		0.972451	0.0469117	0.0467088	0.970266	0.0149577	0.0453378
1.8923	1.05254	0.607205	1.05969	1.06029	0.073242	0.175492		0.932692	0.64742	0.922682	0.933792	0.124903	0.0146599		0.972185	0.0467764	0.0465736	0.97043	0.0150433	0.045509
1.8933	1.05259	0.605933	1.05955	1.05999	0.0736126	0.175542		0.93284	0.646639	0.922235	0.933792	0.127123	0.0149928		0.972451	0.046844	0.0466412	0.969578	0.0147866	0.0457657
1.8943	1.05296	0.605933	1.06012	1.06034	0.0740244	0.175838		0.931947	0.644629	0.921901	0.933015	0.128455	0.0148819		0.972247	0.0470469	0.0467764	0.968547	0.0149577	0.0458513
1.8953	1.05275	0.606675	1.06047	1.06153	0.0734067	0.17569		0.931202	0.643512	0.921789	0.932682	0.129898	0.0145488		0.972315	0.0469793	0.0467764	0.966664	0.0149577	0.0458513
1.8963	1.0528	0.606515	1.06096	1.06207	0.0722949	0.174356		0.93016	0.643512	0.921901	0.932349	0.130342	0.0134386		0.971846	0.0469117	0.0467088	0.965898	0.0148721	0.045509
1.8973	1.05301	0.606886	1.06047	1.06202	0.0722537	0.17401		0.929863	0.644518	0.921678	0.932904	0.130786	0.0126615		0.970963	0.0467088	0.0465736	0.966414	0.0149577	0.0454234
1.8983	1.05275	0.607205	1.05983	1.06148	0.0731596	0.173466		0.929417	0.644182	0.921678	0.933127	0.129565	0.0129946		0.971235	0.0469793	0.0467088	0.965727	0.0148721	0.0449955
1.8993	1.05291	0.606886	1.05934	1.06089	0.0741892	0.173071		0.92912	0.64474	0.921454	0.933349	0.127678	0.0139938		0.971506	0.0470469	0.0467088	0.966156	0.014701	0.0449955
1.9003	1.05344	0.606092	1.05976	1.06074	0.0743538	0.173269		0.929565	0.644182	0.921789	0.933681	0.130454	0.0144378		0.972858	0.0469117	0.0467088	0.965898	0.0147866	0.0450811
1.9013	1.05323	0.605774	1.06005	1.06138	0.0737362	0.173516		0.930012	0.64541	0.921008	0.933904	0.133229	0.0142157		0.97421	0.0471145	0.0467764	0.966328	0.0147866	0.0454234
1.9023	1.05328	0.606515	1.06026	1.06172	0.0728302	0.173961		0.929268	0.644182	0.920338	0.934015	0.134339	0.0144377		0.975358	0.0470469	0.0467088	0.967695	0.0147866	0.0449955
1.9033	1.05323	0.606622	1.06047	1.06187	0.0721714	0.174356		0.928822	0.641168	0.920003	0.932904	0.134006	0.0136607		0.975093	0.0469793	0.0467088	0.968383	0.014701	0.0448244
1.9043	1.0537	0.606568	1.06061	1.06162	0.0722948	0.174455		0.929417	0.64195	0.920227	0.931795	0.135005	0.0131056		0.973062	0.0469117	0.0466412	0.966836	0.0152145	0.0449955
1.9053	1.05412	0.606675	1.0611	1.06197	0.0715535	0.174553		0.93031	0.644963	0.921231	0.932572	0.13445	0.0126614		0.971981	0.0467764	0.0466412	0.965469	0.0148721	0.0451667
1.9063	1.05445	0.607311	1.0616	1.06227	0.0713477	0.173763		0.931054	0.647865	0.922459	0.932793	0.132563	0.0133276		0.970494	0.0470469	0.0467764	0.965641	0.0148721	0.0449955
1.9073	1.05434	0.608212	1.06181	1.06256	0.0724183	0.173368		0.932245	0.648424	0.92324	0.931795	0.130009	0.0135496		0.969951	0.0470469	0.0469117	0.966922	0.0151289	0.0451666
1.9083	1.05423	0.60906	1.06195	1.06266	0.0730774	0.174405		0.932095	0.648424	0.923575	0.93135	0.128011	0.0136605		0.970019	0.0470469	0.0469117	0.968383	0.0149577	0.0448244
1.9093	1.05397	0.609219	1.06181	1.06316	0.0732008	0.174653		0.931947	0.647643	0.923352	0.931572	0.126013	0.0142157		0.971167	0.0469117	0.0468441	0.970008	0.0149577	0.0450811
1.9103	1.0537	0.608583	1.06195	1.06306	0.0726244	0.174702		0.930607	0.64608	0.922459	0.931682	0.126679	0.0143268		0.971438	0.0469117	0.0467088	0.972063	0.0149577	0.0452523
1.9113	1.05333	0.608159	1.06132	1.06281	0.072542	0.175295		0.930012	0.64474	0.922012	0.932461	0.126346	0.0143268		0.971167	0.0468441	0.0467764	0.971977	0.0148721	0.0449955
1.9123	1.05296	0.60747	1.06082	1.06202	0.0726655	0.175838		0.929417	0.643848	0.921454	0.932349	0.127345	0.0145488		0.970963	0.0469117	0.0467764	0.971805	0.0147866	0.0449099
1.9133	1.05237	0.60625	1.06026	1.06177	0.0720889	0.175542		0.927928	0.64474	0.919891	0.932349	0.129898	0.0149928		0.970358	0.0469117	0.0469117	0.97043	0.0148721	0.0449955
1.9143	1.05232	0.605137	1.0599	1.06148	0.0720477	0.175641		0.927482	0.643736	0.919557	0.931905	0.131341	0.0148818		0.970562	0.0471145	0.0468441	0.969148	0.0146154	0.0452523
1.9153	1.0528	0.605032	1.05983	1.06078	0.0727067	0.175838		0.927333	0.643959	0.919446	0.932461	0.131786	0.0156591		0.971438	0.0469793	0.0465736	0.968977	0.0147866	0.0448244
1.9163	1.05275	0.605243	1.05962	1.06059	0.0731596	0.175295		0.928375	0.644963	0.919444	0.932127	0.133451	0.0152149		0.972185	0.0467764	0.0467088	0.969578	0.0148721	0.0449955
1.9173	1.05285	0.605774	1.06012	1.06153	0.0735714	0.1749		0.928673	0.64675	0.919221	0.931572	0.134117	0.0151039		0.972586	0.0469117	0.0467764	0.970008	0.0148721	0.0452523
1.9183	1.05254	0.606251	1.06019	1.06192	0.0739009	0.174405		0.929565	0.647978	0.91911	0.931128	0.136227	0.0153259		0.972519	0.0471145	0.0468441	0.971289	0.0146154	0.0451666
1.9193	1.05169	0.607152	1.05962	1.06256	0.073695	0.173368		0.929565	0.647754	0.919891	0.931905	0.138114	0.0146599		0.972383	0.0471145	0.0467764	0.973859	0.0149577	0.0449955
1.9203	1.05163	0.608053	1.05906	1.06291	0.0745186	0.173318		0.93016	0.646861	0.920673	0.933349	0.129787	0.0128835		0.971981	0.0470469	0.0468441	0.976422	0.014701	0.0446532
1.9213	1.05254	0.608689	1.05955	1.06227	0.0754662	0.173467		0.930458	0.646527	0.92112	0.933015	0.118241	0.0121064		0.97279	0.0470469	0.0469117	0.976594	0.0147866	0.0445676
1.9223	1.05285	0.608848	1.05997	1.06192	0.0757128	0.17322		0.930607	0.647531	0.921565	0.932349	0.114022	0.0123284		0.972383	0.0470469	0.0467764	0.97557	0.0146154	0.0445677
1.9233	1.05306	0.608795	1.06033	1.06133	0.0772774	0.17322		0.93031	0.648982	0.921231	0.930795	0.118019	0.0123284		0.971642	0.046844	0.0467088	0.97343	0.0147866	0.0447388
1.9243	1.05259	0.608635	1.05983	1.06103	0.0772774	0.173862		0.929268	0.64742	0.920338	0.930351	0.122016	0.0128834		0.972185	0.0469117	0.0467088	0.969836	0.0144442	0.0449955
1.9253	1.05254	0.608371	1.05983	1.06068	0.0762895	0.174653		0.929268	0.646192	0.920003	0.931128	0.125458	0.0127725		0.972722	0.0467088	0.0463707	0.968977	0.0141875	0.0453378
1.9263	1.05312	0.607894	1.06026	1.06029	0.0767015	0.174208		0.92897	0.646192	0.920227	0.931572	0.128566	0.0128835		0.972451	0.0466412	0.0463707	0.967352	0.0146154	0.0452523
1.9273	1.05338	0.606834	1.06089	1.06009	0.0761662	0.174405		0.92912	0.647084	0.920227	0.931239	0.131786	0.0132166		0.972519	0.0465736	0.0463031	0.967953	0.014701	0.0453378
1.9283	1.05328	0.606357	1.06075	1.06079	0.0746832	0.173714		0.929715	0.647865	0.920227	0.930462	0.135782	0.0128835		0.971778	0.0467764	0.0466412	0.968211	0.014701	0.045509
1.9293	1.05328	0.606197	1.06082	1.06103	0.0746833	0.173615		0.929715	0.648201	0.920673	0.930239	0.137226	0.0126615		0.97171	0.0467764	0.0466412	0.967266	0.0147866	0.0452523
1.9303	1.05333	0.605933	1.06089	1.06187	0.0745598	0.174455		0.929268	0.647196	0.919221	0.931572	0.140557	0.0137716		0.970895	0.0468441	0.0466412	0.967094	0.0145298	0.0445677
1.9313	1.05312	0.605879	1.06075	1.06281	0.0743127	0.174405		0.92763	0.646303	0.918887	0.932349	0.138446	0.0141047		0.969951	0.0469117	0.0467764	0.967953	0.0145298	0.0443965
1.9323	1.05259	0.606304	1.06026	1.06237	0.073942	0.173269		0.927928	0.645969	0.918776	0.932461	0.132563	0.0147708		0.970562	0.0467764	0.0465736	0.968211	0.0148721	0.0446532
1.9333	1.05201	0.606622	1.05962	1.06183	0.0732832	0.174208		0.928226	0.646526	0.919668	0.932127	0.128899	0.015548		0.969951	0.0468441	0.0467088	0.970266	0.0149577	0.0450811
1.9343	1.05174	0.607152	1.05962	1.06192	0.0726244	0.175641		0.928822	0.646861	0.919333	0.931905	0.126679	0.0162141		0.969543	0.0468441	0.0467764	0.969922	0.0147866	0.0453378
1.9353	1.05222	0.607364	1.06033	1.06172	0.0733656	0.176036		0.927928	0.64608	0.919333	0.933238	0.127123	0.0175464		0.97029	0.0471145	0.046844	0.968891	0.014701	0.0449955
1.9363	1.0528	0.606568	1.06061	1.06148	0.0742303	0.176332		0.92778	0.64474	0.918887	0.932461	0.127345	0.0169912		0.971574	0.0469117	0.0468441	0.968719	0.014701	0.0452523
1.9373	1.05264	0.605615	1.06033	1.06148	0.0741068	0.175492		0.928226	0.642174	0.918999	0.932238	0.128677	0.0159922		0.97171	0.046844	0.0468441	0.969148	0.0145298	0.0453378
1.9383	1.05237	0.605085	1.06005	1.06158	0.0743127	0.174899		0.929268	0.640052	0.92045	0.932016	0.132674	0.0147708		0.971099	0.0468441	0.0466412	0.969492	0.0146154	0.0452523
1.9393	1.0527	0.605085	1.06033	1.06172	0.0743127	0.175097		0.929565	0.639606	0.920784	0.931128	0.135227	0.0129945		0.971914	0.0468441	0.0465736	0.966664	0.0148721	0.0451666
1.9403	1.05301	0.605137	1.06061	1.06183	0.0731597	0.175246		0.928673	0.639606	0.920227	0.932127	0.131341	0.0129945		0.97279	0.0469793	0.0467088	0.965211	0.0146154	0.0449099
1.9413	1.0537	0.605403	1.06117	1.06114	0.0730773	0.174801		0.92763	0.641057	0.918999	0.932127	0.129121	0.0139938		0.973198	0.0469793	0.0467088	0.966242	0.0144442	0.0452523
1.9423	1.05455	0.605826	1.06188	1.06128	0.0745186	0.174603		0.927482	0.642842	0.91844	0.931905	0.130009	0.0141047		0.972049	0.0469117	0.0465736	0.968633	0.0144442	0.0450811
1.9433	1.05428	0.606145	1.06174	1.06138	0.0735714	0.174801		0.928226	0.644852	0.918999	0.931905	0.130009	0.0152149		0.971914	0.046844	0.0465736	0.972063	0.014701	0.0449955
1.9443	1.05392	0.606197	1.0611	1.06103	0.0731596	0.174455		0.927928	0.645969	0.919333	0.931128	0.128677	0.0153259		0.973401	0.0467764	0.0467088	0.973688	0.0143587	0.0450811
1.9453	1.05359	0.605721	1.06139	1.06044	0.073242	0.174553		0.92912	0.645633	0.920003	0.930573	0.127123	0.0156591		0.974617	0.0469793	0.0467088	0.972656	0.0146154	0.0451666
1.9463	1.05412	0.604872	1.0621	1.06014	0.0747656	0.174553		0.929565	0.645522	0.920673	0.929351	0.1279	0.0156591		0.974957	0.0471145	0.0469793	0.971375	0.014701	0.0451666
1.9473	1.05349	0.604819	1.06153	1.06005	0.0750128	0.175492		0.92912	0.645188	0.920784	0.929574	0.128566	0.0144378		0.97387	0.0470469	0.0469793	0.971977	0.0147009	0.0449099
1.9483	1.05222	0.606092	1.06061	1.05985	0.0748068	0.175641		0.928673	0.644963	0.919668	0.929907	0.126235	0.0131055		0.973062	0.0471145	0.046844	0.970945	0.0150433	0.0453378
1.9493	1.05179	0.606834	1.06061	1.06029	0.074601	0.174998		0.927333	0.645745	0.918887	0.929462	0.125236	0.0139936		0.972049	0.0471821	0.046844	0.970344	0.0148721	0.0453378
1.9503	1.05201	0.607841	1.06026	1.06083	0.074148	0.174505		0.926887	0.644518	0.918776	0.929351	0.123015	0.0143268		0.971099	0.0471821	0.0468441	0.972141	0.0148721	0.0449099
1.9513	1.05206	0.607841	1.06033	1.06143	0.0738598	0.17401		0.927333	0.643624	0.918663	0.928908	0.119462	0.0143268		0.970698	0.0471145	0.0468441	0.972398	0.0153001	0.0453378
1.9523	1.05216	0.607575	1.06033	1.06093	0.074848	0.173269		0.92644	0.641391	0.918329	0.929241	0.120129	0.0144378		0.970698	0.0471145	0.0470469	0.972742	0.0151289	0.0450811
1.9533	1.0528	0.60641	1.06012	1.05989	0.0748892	0.173368		0.925696	0.640276	0.917882	0.929019	0.122682	0.0145488		0.971438	0.0469793	0.0471145	0.972742	0.0151289	0.0453378
1.9543	1.05264	0.605826	1.06005	1.06014	0.0745186	0.174159		0.925398	0.640164	0.917325	0.928353	0.125125	0.0133275		0.972179	0.0472498	0.0469793	0.97257	0.0148721	0.0456802
1.9553	1.05306	0.605455	1.06026	1.06103	0.0748892	0.174405		0.925696	0.64128	0.917436	0.929796	0.125569	0.0132166		0.972926	0.0472498	0.0470469	0.972227	0.0149577	0.0454234
1.9563	1.05392	0.605085	1.06082	1.06227	0.0755481	0.175048		0.926887	0.64262	0.918217	0.930351	0.12679	0.0142157		0.973198	0.0471145	0.0468441	0.972656	0.0146154	0.0451666
1.9573	1.05402	0.605879	1.06146	1.06326	0.0754248	0.174751		0.92644	0.643401	0.918329	0.931682	0.128455	0.0145488		0.97279	0.0467764	0.0468441	0.973258	0.0151288	0.0454234
1.9583	1.05402	0.606515	1.06146	1.06345	0.074848	0.173466		0.92644	0.644406	0.918217	0.932572	0.131453	0.0154369		0.972049	0.0470469	0.0467764	0.972656	0.0148721	0.0454234
1.9593	1.05402	0.606886	1.06167	1.06345	0.0748068	0.173071		0.926588	0.643512	0.918106	0.932904	0.134228	0.0152149		0.972185	0.0468441	0.0466412	0.973	0.0147866	0.0450811
1.9603	1.05402	0.607099	1.06139	1.0635	0.0753008	0.173269		0.926291	0.644629	0.917882	0.933238	0.135449	0.0149928		0.971914	0.0468441	0.0465736	0.973688	0.014701	0.0452523
1.9613	1.05445	0.607364	1.06089	1.06316	0.0750539	0.173417		0.925398	0.647196	0.917101	0.932682	0.13667	0.0156591		0.971846	0.0467764	0.0466412	0.974023	0.0147866	0.0455945
1.9623	1.05445	0.60747	1.06089	1.06276	0.0737362	0.172774		0.925993	0.649875	0.917101	0.932572	0.137447	0.0165472		0.970759	0.0468441	0.0466412	0.973773	0.0150433	0.0452523
1.9633	1.05434	0.607257	1.06082	1.06148	0.0719243	0.172774		0.926738	0.650992	0.917882	0.931905	0.136559	0.0168803		0.970895	0.0469117	0.0466412	0.972656	0.0152145	0.0451666
1.9643	1.05381	0.607099	1.06019	1.06068	0.0703181	0.173665		0.927482	0.649764	0.917882	0.931905	0.134228	0.0172132		0.97171	0.0471145	0.0468441	0.971547	0.0147866	0.0453378
1.9653	1.05397	0.606781	1.06075	1.05945	0.0702359	0.174455		0.92763	0.647977	0.918217	0.930905	0.132452	0.0164361		0.97313	0.0472498	0.0469117	0.971375	0.0149577	0.0452523
1.9663	1.05375	0.606939	1.06103	1.05871	0.0709771	0.174208		0.92778	0.646303	0.918329	0.930573	0.131231	0.0161031		0.973605	0.0475202	0.0473173	0.972148	0.0147866	0.0451666
1.9673	1.05301	0.606357	1.06075	1.05989	0.0712242	0.17574		0.92763	0.645075	0.91911	0.930462	0.131897	0.0162141		0.973198	0.047385	0.0471145	0.971547	0.0147866	0.0450811
1.9683	1.0528	0.605986	1.0604	1.06083	0.0723773	0.176629		0.92763	0.64474	0.919221	0.930462	0.132896	0.0153259		0.972722	0.047385	0.0471821	0.971461	0.0147866	0.0450811
1.9693	1.05275	0.605562	1.06082	1.06108	0.0736538	0.176382		0.92778	0.644406	0.919221	0.930128	0.13334	0.0146599		0.972451	0.0471145	0.0469117	0.972148	0.0145298	0.0449955
1.9703	1.05317	0.605986	1.06146	1.06089	0.0742714	0.174998		0.926738	0.645188	0.918887	0.930239	0.127234	0.0146597		0.97137	0.0471145	0.0469793	0.971633	0.0150433	0.0454234
1.9713	1.05381	0.606993	1.06139	1.06059	0.0734479	0.173812		0.92644	0.645745	0.91911	0.930462	0.12679	0.0146599		0.970562	0.0472498	0.0469793	0.972148	0.0148721	0.0452523
1.9723	1.05423	0.607628	1.06181	1.06108	0.072336	0.172923		0.927185	0.64675	0.919221	0.930905	0.129676	0.0145488		0.971302	0.0472498	0.0469793	0.972484	0.0150433	0.0451666
1.9733	1.05423	0.607523	1.06125	1.06089	0.072336	0.17322		0.926738	0.647531	0.918776	0.931018	0.130009	0.0144378		0.971574	0.0468441	0.0466412	0.973945	0.014701	0.0453378
1.9743	1.05359	0.607099	1.06068	1.06029	0.0715535	0.173714		0.927035	0.648871	0.918776	0.931128	0.131341	0.0139936		0.972117	0.0470469	0.0465736	0.974281	0.0146154	0.0451667
1.9753	1.05301	0.606834	1.06054	1.06005	0.0724596	0.174059		0.927333	0.650656	0.918663	0.931461	0.13112	0.0139936		0.972247	0.0471821	0.0469117	0.973172	0.0145298	0.0448244
1.9763	1.05264	0.606781	1.06005	1.06074	0.0719242	0.17401		0.926887	0.650545	0.917995	0.932238	0.130231	0.0146599		0.972117	0.0473173	0.0471821	0.971203	0.0145298	0.0446532
1.9773	1.05243	0.605774	1.05983	1.06143	0.0719654	0.174653		0.926738	0.649541	0.91777	0.932238	0.130675	0.0147708		0.971846	0.0473173	0.0470469	0.970094	0.0145298	0.0451666
1.9783	1.05237	0.604714	1.05983	1.06177	0.0726243	0.174553		0.927035	0.647977	0.918106	0.932127	0.130009	0.0151039		0.972185	0.0473173	0.0469117	0.969406	0.0142731	0.045509
1.9793	1.05169	0.604395	1.05906	1.06172	0.072995	0.174356		0.927035	0.646192	0.917995	0.930795	0.129787	0.015548		0.971914	0.0471822	0.0469117	0.968297	0.0141875	0.0450811
1.9803	1.05174	0.604448	1.05912	1.06217	0.073942	0.174257		0.927035	0.644406	0.917212	0.929462	0.128677	0.015992		0.971506	0.0469117	0.0466412	0.969578	0.0147866	0.0446532
1.9813	1.05237	0.605297	1.05976	1.06241	0.0747245	0.174505		0.925993	0.643289	0.916766	0.929462	0.127678	0.0158811		0.970086	0.0467764	0.0463031	0.970516	0.014701	0.0447388
1.9823	1.05312	0.606145	1.06054	1.06177	0.0754248	0.174505		0.924952	0.641615	0.916878	0.929462	0.129232	0.0166581		0.968735	0.0469793	0.0467088	0.971805	0.0147866	0.0445677
1.9833	1.05365	0.605986	1.06096	1.06153	0.0747244	0.174307		0.925696	0.639829	0.917101	0.929241	0.130453	0.0165472		0.969142	0.0470469	0.0466412	0.973086	0.0148721	0.0442253
1.9843	1.05412	0.606145	1.06146	1.06113	0.0743539	0.174257		0.926291	0.64195	0.91777	0.929462	0.130453	0.0163251		0.969951	0.0471145	0.0469117	0.971375	0.0151289	0.0443109
1.9853	1.05428	0.605826	1.06139	1.06039	0.0742303	0.173813		0.92644	0.643512	0.91844	0.929351	0.130453	0.015548		0.97171	0.0469793	0.0467764	0.969063	0.0147866	0.0442253
1.9863	1.05402	0.60519	1.06089	1.06024	0.074601	0.173664		0.925993	0.644182	0.91777	0.929462	0.131342	0.015548		0.971914	0.0471145	0.0469793	0.96975	0.0147866	0.0440541
1.9873	1.05386	0.605032	1.06054	1.06059	0.0740243	0.173961		0.92644	0.644182	0.91777	0.928908	0.13334	0.0153259		0.971778	0.0470469	0.0467764	0.970945	0.0150433	0.0442253
1.9883	1.05354	0.605403	1.06075	1.06054	0.073242	0.174553		0.927185	0.644518	0.918552	0.928353	0.135338	0.0148819		0.970963	0.0472498	0.0471822	0.971977	0.0145298	0.0443109
1.9893	1.05354	0.605721	1.06082	1.06064	0.072789	0.174899		0.928077	0.64541	0.91911	0.928131	0.135005	0.0152149		0.970562	0.0469117	0.0467764	0.971633	0.0150433	0.0446532
1.9903	1.05349	0.605774	1.06068	1.06089	0.0732421	0.175246		0.928226	0.644518	0.919221	0.928242	0.136893	0.0144377		0.970358	0.0470469	0.0467764	0.972227	0.0148721	0.0449955
1.9913	1.05317	0.606304	1.06026	1.06148	0.073242	0.175492		0.927333	0.645299	0.918552	0.929574	0.139003	0.0138827		0.969951	0.0470469	0.046506	0.97343	0.0149577	0.0450811
1.9923	1.05301	0.60747	1.05997	1.06197	0.0723772	0.175542		0.925548	0.645522	0.917436	0.929574	0.136893	0.0139936		0.969679	0.0468441	0.0467764	0.973688	0.0149577	0.0454234
1.9933	1.05328	0.607735	1.06054	1.06158	0.0728714	0.175542		0.924952	0.645075	0.916543	0.930573	0.135561	0.0136607		0.969074	0.0469793	0.0467764	0.971375	0.0147866	0.0454234
1.9943	1.0537	0.607311	1.06117	1.06123	0.0727478	0.17574		0.924952	0.642285	0.916543	0.931682	0.133451	0.0133276		0.970562	0.0469793	0.0466412	0.970688	0.0146154	0.0453378
1.9953	1.0537	0.606939	1.06132	1.06133	0.0737774	0.175443		0.925696	0.642061	0.917325	0.931795	0.13223	0.0127725		0.972049	0.0469793	0.0467088	0.971547	0.0144442	0.0452523
1.9963	1.05365	0.606463	1.0616	1.06162	0.075095	0.174998		0.92644	0.643736	0.917995	0.931905	0.13223	0.0128835		0.973265	0.0465736	0.046506	0.974195	0.0146154	0.0449099
1.9973	1.05344	0.606092	1.06139	1.06123	0.0753008	0.17574		0.926887	0.643848	0.917882	0.931128	0.131119	0.0133276		0.973469	0.0467088	0.0465736	0.974797	0.014701	0.0449955
1.9983	1.05306	0.606197	1.06082	1.06133	0.0753421	0.175147		0.926738	0.642173	0.917995	0.930351	0.132563	0.0135496		0.972654	0.0467764	0.046506	0.974539	0.0148721	0.0452523
1.9993	1.05323	0.606197	1.06089	1.06133	0.075054	0.174356		0.927333	0.640946	0.918329	0.930128	0.132674	0.0139936		0.971914	0.0467764	0.046506	0.973773	0.014701	0.0453378
2.0003	1.05381	0.606092	1.06132	1.06098	0.0750951	0.174159		0.926738	0.642955	0.91777	0.929351	0.123015	0.0143268		0.970895	0.0467764	0.0466412	0.973172	0.0145298	0.0448244
2.0013	1.05434	0.606039	1.06195	1.06074	0.0755481	0.174356		0.924654	0.64541	0.916655	0.928574	0.119351	0.0136607		0.97063	0.0467764	0.0467764	0.973172	0.0146154	0.0449955
2.0023	1.05428	0.606197	1.0621	1.06064	0.0752602	0.174899		0.923761	0.647531	0.916208	0.928019	0.121905	0.0138827		0.971981	0.0466412	0.0466412	0.972484	0.0148721	0.0450811
2.0033	1.05434	0.606675	1.0621	1.0602	0.0749305	0.175048		0.924803	0.649986	0.916655	0.928019	0.125236	0.0139936		0.972586	0.046844	0.0466412	0.972313	0.0148722	0.0449955
2.0043	1.05375	0.606781	1.06195	1.0594	0.0740244	0.174405		0.925696	0.652219	0.918217	0.928353	0.127789	0.0143268		0.971574	0.0471145	0.0466412	0.971289	0.0150433	0.0449955
2.0053	1.05312	0.606568	1.06146	1.05881	0.0734479	0.174356		0.92644	0.653447	0.918887	0.929019	0.128344	0.0154369		0.971914	0.0470469	0.0467764	0.970008	0.0147866	0.0449099
2.0063	1.05312	0.606728	1.06089	1.05926	0.0732832	0.174949		0.927185	0.652666	0.918776	0.929907	0.129232	0.0142158		0.971506	0.0468441	0.0466412	0.970688	0.0146154	0.0449955
2.0073	1.05344	0.606197	1.06075	1.05995	0.0731596	0.175592		0.927185	0.650433	0.91844	0.929796	0.129676	0.0144378		0.971778	0.0470469	0.0467088	0.971891	0.0152145	0.0453378
2.0083	1.0528	0.605403	1.06047	1.06108	0.0737362	0.174801		0.927185	0.648535	0.917882	0.929351	0.131009	0.0148819		0.972185	0.0469117	0.0467088	0.973	0.0149577	0.0450811
2.0093	1.05254	0.605561	1.06012	1.06232	0.0740656	0.173862		0.927482	0.649094	0.917548	0.928574	0.136226	0.0151039		0.971914	0.0469793	0.046844	0.971719	0.0151288	0.045509
2.0103	1.0527	0.605085	1.06047	1.06237	0.0738597	0.173368		0.927333	0.650209	0.917659	0.928908	0.141334	0.0145488		0.971167	0.0469793	0.0466412	0.968805	0.0150433	0.045509
2.0113	1.05259	0.604926	1.05997	1.06276	0.0748068	0.173368		0.92644	0.648424	0.917548	0.928353	0.14422	0.0141047		0.971438	0.0467764	0.0465736	0.967781	0.0151289	0.0454234
2.0123	1.05291	0.605455	1.05983	1.06271	0.0762068	0.173615		0.92525	0.645969	0.917212	0.928908	0.143109	0.0131056		0.970963	0.0467088	0.0464383	0.968297	0.0153856	0.0447388
2.0133	1.05412	0.605986	1.06096	1.06222	0.0772774	0.174653		0.925101	0.644406	0.917436	0.92913	0.139224	0.0135496		0.970019	0.046506	0.0465736	0.967953	0.0153	0.0450811
2.0143	1.05455	0.606357	1.06195	1.06197	0.0770714	0.175097		0.924952	0.643959	0.917436	0.928353	0.136449	0.0149928		0.969272	0.0467764	0.0463031	0.966586	0.0147866	0.0446532
2.0153	1.05439	0.606463	1.0621	1.06158	0.0767015	0.175246		0.92525	0.644071	0.917325	0.929351	0.132341	0.016103		0.969951	0.0467764	0.0465736	0.964703	0.0148721	0.0448244
2.0163	1.05344	0.605508	1.06075	1.06133	0.0758361	0.174603		0.925398	0.645633	0.917212	0.929907	0.129899	0.016325		0.971302	0.0466412	0.0463031	0.964531	0.0147866	0.0448244
2.0173	1.05232	0.604979	1.06012	1.06153	0.0750539	0.174801		0.92525	0.646192	0.916989	0.929574	0.128344	0.015992		0.97137	0.0468441	0.0466412	0.966922	0.014701	0.0447388
2.0183	1.05285	0.605403	1.06054	1.06183	0.0756308	0.174553		0.925101	0.644852	0.916655	0.929462	0.127567	0.0156591		0.971235	0.0469117	0.0467088	0.969148	0.0148721	0.0454234
2.0193	1.05291	0.605826	1.06033	1.06177	0.0755895	0.175147		0.925696	0.644182	0.917436	0.929796	0.128122	0.0157701		0.97171	0.0467088	0.0467088	0.971719	0.0145298	0.0448244
2.0203	1.05248	0.605668	1.05941	1.06162	0.074848	0.175147		0.92644	0.642842	0.91777	0.930239	0.127345	0.0151038		0.972722	0.0469117	0.0464383	0.972148	0.0145298	0.0450811
2.0213	1.05169	0.605297	1.05828	1.06192	0.0732832	0.174553		0.92763	0.642173	0.918776	0.930795	0.13334	0.0138827		0.973537	0.0467088	0.0464383	0.971031	0.0144442	0.045509
2.0223	1.05174	0.604819	1.05828	1.06237	0.0731185	0.174059		0.926887	0.641727	0.918329	0.930905	0.137115	0.0136607		0.972858	0.0465736	0.0463707	0.970266	0.0142731	0.0454234
2.0233	1.05216	0.60519	1.0587	1.06271	0.0752602	0.17317		0.925696	0.641057	0.917882	0.931018	0.136338	0.0136607		0.972586	0.0468441	0.046506	0.970773	0.0146154	0.0453378
2.0243	1.0528	0.604766	1.05934	1.06271	0.0781429	0.173763		0.92644	0.64061	0.917882	0.930351	0.135227	0.0131056		0.972926	0.0470469	0.0468441	0.974281	0.0144442	0.0450811
2.0253	1.05306	0.604819	1.05955	1.06217	0.0783895	0.174455		0.925548	0.64128	0.917325	0.930239	0.133451	0.0132166		0.97279	0.0471145	0.0469117	0.975906	0.0148721	0.045509
2.0263	1.05328	0.604819	1.06047	1.06168	0.0772368	0.175592		0.926143	0.641615	0.917659	0.929685	0.132341	0.0127725		0.972654	0.0470469	0.0468441	0.974625	0.0145298	0.0460224
2.0273	1.05354	0.604501	1.06103	1.06118	0.0769068	0.175394		0.925845	0.642285	0.918217	0.930795	0.132341	0.0121063		0.972117	0.0471822	0.0467764	0.972656	0.0146154	0.0458513
2.0283	1.05365	0.604714	1.0616	1.06089	0.0764128	0.17485		0.926291	0.642173	0.918329	0.930128	0.130454	0.0128835		0.972117	0.0469793	0.0467764	0.971719	0.0146154	0.0456802
2.0293	1.05386	0.603866	1.06203	1.05995	0.0757128	0.17485		0.92525	0.643624	0.917101	0.929351	0.127234	0.0126615		0.971438	0.0470469	0.0469117	0.970094	0.014701	0.045509
2.0303	1.05386	0.603441	1.0623	1.05911	0.0737772	0.174702		0.924208	0.643848	0.916208	0.929241	0.123237	0.0132166		0.971574	0.0471822	0.0467088	0.969063	0.0150433	0.0454234
2.0313	1.05397	0.60323	1.06195	1.05881	0.0722537	0.173911		0.923166	0.643401	0.915649	0.929351	0.124458	0.0131055		0.972858	0.0473173	0.0469117	0.96975	0.0149577	0.0457657
2.0323	1.05312	0.602912	1.06082	1.0595	0.0709771	0.172824		0.923315	0.643401	0.915427	0.929351	0.127345	0.0139936		0.973401	0.047385	0.0471145	0.970773	0.0151289	0.0453378
2.0333	1.05296	0.604343	1.06103	1.0597	0.0708947	0.172478		0.924208	0.643959	0.915762	0.928797	0.129232	0.0138827		0.972117	0.0471821	0.0469793	0.970602	0.0152145	0.0451666
2.0343	1.05296	0.606357	1.0611	1.06029	0.0708535	0.171984		0.925993	0.644963	0.916878	0.928464	0.130898	0.0145488		0.971438	0.0470469	0.0467764	0.969063	0.0149577	0.0453378
2.0353	1.05349	0.607099	1.0611	1.06005	0.0712653	0.172676		0.926887	0.644963	0.918217	0.928797	0.130564	0.0143268		0.971167	0.0469793	0.0467088	0.966664	0.0148721	0.0456802
2.0363	1.05306	0.607152	1.0604	1.06009	0.0725008	0.173071		0.92778	0.644963	0.91911	0.928131	0.131786	0.0141047		0.971642	0.046844	0.0465736	0.964867	0.0147866	0.0455945
2.0373	1.05243	0.607417	1.05948	1.06029	0.0730773	0.173565		0.926738	0.644293	0.918552	0.928242	0.132119	0.0145488		0.971778	0.0471822	0.0468441	0.964617	0.0145298	0.0455945
2.0383	1.05248	0.607841	1.05948	1.06009	0.073242	0.174505		0.926291	0.642842	0.91777	0.928574	0.133229	0.0144378		0.971914	0.0471821	0.0469793	0.965984	0.0141875	0.0455945
2.0393	1.05264	0.607628	1.05919	1.0595	0.0743126	0.174208		0.925696	0.641168	0.917659	0.928464	0.135005	0.0138827		0.971642	0.0471145	0.0469793	0.967695	0.0145298	0.0456801
2.0403	1.0528	0.608053	1.05976	1.0598	0.0736126	0.174159		0.926588	0.640721	0.917882	0.92913	0.133007	0.0132165		0.972451	0.0470469	0.0467088	0.967781	0.0143587	0.0453378
2.0413	1.05306	0.608583	1.06026	1.05999	0.0739832	0.174307		0.926143	0.64128	0.917548	0.929351	0.130453	0.0133276		0.973333	0.0468441	0.0467088	0.966922	0.0143587	0.0451666
2.0423	1.0527	0.60906	1.0599	1.06009	0.0747656	0.174109		0.924654	0.640946	0.916989	0.929241	0.13012	0.0138827		0.973469	0.0469117	0.0466412	0.967437	0.0142731	0.0452523
2.0433	1.05264	0.609272	1.05997	1.06034	0.0747656	0.174059		0.924356	0.639717	0.916096	0.929351	0.128122	0.0146599		0.972926	0.0472498	0.0469793	0.968719	0.0145298	0.0449955
2.0443	1.05243	0.60959	1.06005	1.06049	0.0756714	0.173516		0.923761	0.639495	0.915649	0.929574	0.129898	0.0147708		0.973469	0.0472498	0.0469793	0.967695	0.0148721	0.0451666
2.0453	1.05291	0.609484	1.06026	1.06049	0.0763714	0.172824		0.924654	0.640721	0.916431	0.929907	0.13223	0.0141047		0.973469	0.0470469	0.0467088	0.967094	0.0147866	0.0452523
2.0463	1.05275	0.609219	1.06005	1.05995	0.0774835	0.173269		0.925101	0.640946	0.916989	0.928796	0.132896	0.0134385		0.972586	0.0469793	0.0467088	0.966922	0.0146154	0.0453378
2.0473	1.05243	0.608053	1.05997	1.05926	0.0774015	0.174702		0.926143	0.643289	0.918217	0.928464	0.133229	0.0124394		0.971235	0.0467764	0.046506	0.96718	0.0145298	0.0451666
2.0483	1.05185	0.607682	1.05969	1.05926	0.0763308	0.175097		0.926143	0.64541	0.918217	0.928131	0.133451	0.0122174		0.970963	0.0463707	0.0464383	0.967953	0.0141875	0.0453378
2.0493	1.05195	0.607417	1.05948	1.0595	0.073407	0.175245		0.926738	0.646192	0.917995	0.928353	0.131342	0.0117733		0.972117	0.0467764	0.0466412	0.968633	0.0146154	0.0452522
2.0503	1.05227	0.606675	1.05934	1.06014	0.0722536	0.174257		0.926738	0.644963	0.91777	0.929907	0.124347	0.0117733		0.972586	0.0469117	0.0469117	0.967523	0.0145298	0.0454234
2.0513	1.05222	0.606039	1.05976	1.06089	0.0718007	0.173022		0.927482	0.643289	0.918106	0.930239	0.123792	0.0119953		0.971981	0.0471821	0.0468441	0.968039	0.014701	0.0451666
2.0523	1.05259	0.60625	1.06019	1.06128	0.0712242	0.172774		0.927482	0.641391	0.917995	0.929574	0.127567	0.0125505		0.971914	0.0474526	0.0471821	0.968297	0.0149577	0.0454234
2.0533	1.05254	0.606886	1.0599	1.06103	0.0715125	0.172429		0.926738	0.640834	0.917548	0.929907	0.130675	0.0133276		0.972247	0.0475202	0.0472498	0.968633	0.0147866	0.0449099
2.0543	1.05243	0.607417	1.05983	1.06133	0.0727067	0.17233		0.926143	0.640834	0.917325	0.930351	0.131342	0.0137716		0.972117	0.047385	0.0471821	0.969063	0.0150433	0.0451666
[truncated: 17,287 more rows]
