# Supplementary material for: Simultaneous recording of multiple cellular signaling events by frequency- and spectrally-tuned multiplexing of fluorescent probes
Source: eLife. 2021 Dec 3;10:e63129. doi: 10.7554/eLife.63129 (PMC8700268; doi:10.7554/eLife.63129)
Supplement: Figure 7—figure supplement 1—source data 1. [file elife-63129-fig7-figsupp1-data1.xlsx]

## Sheet: 7C & Supp02
	FuraFF-loaded sperm, ex: 370				FuraFF-loaded sperm, ex: 340				BCECF-loaded sperm, ex: 445				BCECF-loaded sperm, ex: 485
linear fitting results	BCECF channel ex: 445	BCECF channel ex: 485			BCECF channel ex: 445	BCECF channel ex: 485					Fura-FF channel ex: 370	Fura-FF channel ex: 340			Fura-FF channel ex: 370	Fura-FF channel ex: 340
slope	0.1099	0.001173			-1.373	-0.01789					0.132	-0.08608			-0.03122	0.02537
y-intercent	-0.02639	0.04107			2.136	0.06855					-0.06933	0.5251			0.6124	0.03607
	Fluorescence								Fluorescence				Fluorescence
	BCECF channel ex: 445	BCECF channel ex: 485	Fura-FF channel ex: 370	Fura-FF channel ex: 340	BCECF channel ex: 445	BCECF channel ex: 485	Fura-FF channel ex: 370	Fura-FF channel ex: 340	BCECF channel ex: 445	BCECF channel ex: 485	Fura-FF channel ex: 370	Fura-FF channel ex: 340	BCECF channel ex: 445	BCECF channel ex: 485	Fura-FF channel ex: 370	Fura-FF channel ex: 340
	0.427619	0.0221035	4.10616		0.427619	0.0221035		1.27874	3.22974		0.400015	0.175568		6.79029	0.400015	0.175568
	0.428933	0.0970285	4.22808		0.428933	0.0970285		1.30207	3.28134		0.434191	0.228147		6.78404	0.434191	0.228147
	0.460809	0.0690959	4.22808		0.460809	0.0690959		1.27085	3.34279		0.376026	0.24885		6.7479	0.376026	0.24885
	0.429919	0.0424778	4.31385		0.429919	0.0424778		1.28498	3.36415		0.387199	0.225518		6.75315	0.387199	0.225518
	0.428605	0.0510219	4.30202		0.428605	0.0510219		1.29123	3.30828		0.380955	0.204487		6.80606	0.380955	0.204487
	0.440106	0.0237465	4.33291		0.440106	0.0237465		1.33329	3.34476		0.391142	0.229133		6.93225	0.391142	0.229133
	0.436163	0.050036	4.29249		0.436163	0.050036		1.27907	3.35528		0.416446	0.226833		7.08275	0.416446	0.226833
	0.420389	0.025061	4.30794		0.420389	0.025061		1.3116	3.40753		0.388184	0.243592		7.20138	0.388184	0.243592
	0.452594	0.0132308	4.27737		0.452594	0.0132308		1.31193	3.36711		0.367482	0.249836		7.2648	0.367482	0.249836
	0.450293	0.0309762	4.31188		0.450293	0.0309762		1.2817	3.38748		0.379312	0.207116		7.35648	0.379312	0.207116
	0.436163	0.0556225	4.34145		0.436163	0.0556225		1.28466	3.33096		0.384898	0.256408		7.43897	0.384898	0.256408
	0.425976	0.0411633	4.31286		0.425976	0.0411633		1.29714	3.35133		0.366824	0.199557		7.5221	0.366824	0.199557
	0.42959	0.0230893	4.28296		0.42959	0.0230893		1.29353	3.27674		0.385227	0.195614		7.56351	0.385227	0.195614
	0.482169	0.0503646	4.28099		0.482169	0.0503646		1.30404	3.30763		0.348093	0.230119		7.66308	0.348093	0.230119
	0.444707	0.0697531	4.27442		0.444707	0.0697531		1.29977	3.29777		0.345135	0.184441		7.65749	0.345135	0.184441
	0.459823	0.0303189	4.26423		0.459823	0.0303189		1.28761	3.31486		0.364853	0.241292		7.70711	0.364853	0.241292
	0.435506	0.0428064	4.31648		0.435506	0.0428064		1.30799	3.28397		0.32739	0.257394		7.77645	0.32739	0.257394
	0.391799	0.0313048	4.31977		0.391799	0.0313048		1.31325	3.25143		0.378983	0.222561		7.84776	0.378983	0.222561
	0.42729	0.0214462	4.31615		0.42729	0.0214462		1.28301	3.31124		0.406916	0.215331		7.84184	0.406916	0.215331
	0.42729	0.0398489	4.29578		0.42729	0.0398489		1.28038	3.23007		0.348093	0.191671		7.84841	0.348093	0.191671
	0.436163	0.0332765	4.3385		0.436163	0.0332765		1.307	3.25209		0.366824	0.238663		7.91512	0.366824	0.238663
	0.428605	0.00731562	4.28033		0.428605	0.00731562		1.23142	3.27477		0.356637	0.235705		7.9769	0.356637	0.235705
	0.474611	0.0352482	4.28493		0.474611	0.0352482		1.28268	3.26096		0.361238	0.269553		8.02553	0.361238	0.269553
	0.445364	0.038863	4.29019		0.445364	0.038863		1.31095	3.25833		0.413488	0.24425		8.01666	0.413488	0.24425
	0.424333	0.0470785	4.32897		0.424333	0.0470785		1.2725	3.21693		0.355651	0.201529		8.09914	0.355651	0.201529
	0.408887	0.0664669	4.2754		0.408887	0.0664669		1.28564	3.26688		0.367153	0.242935		8.0952	0.367153	0.242935
	0.44865	0.0434637	4.2892		0.44865	0.0434637		1.27545	3.24486		0.3941	0.233405		8.17275	0.3941	0.233405
	0.455223	0.0332765	4.2869		0.455223	0.0332765		1.29846	3.22613		0.378655	0.254108		8.109	0.378655	0.254108
	0.468039	0.0444495	4.27935		0.468039	0.0444495		1.25837	3.23336		0.354337	0.215988		8.13792	0.354337	0.215988
	0.438135	0.0168456	4.2593		0.438135	0.0168456		1.29189	3.27148		0.323118	0.243592		8.2112	0.323118	0.243592
	0.416446	0.0418206	4.23235		0.416446	0.0418206		1.27052	3.27937		0.360252	0.22026		8.24275	0.360252	0.22026
	0.411845	0.0253896	4.29446		0.411845	0.0253896		1.31982	3.24355		0.374711	0.246221		8.25392	0.374711	0.246221
	0.42499	0.0293331	4.25141		0.42499	0.0293331		1.30766	3.20477		0.35598	0.257723		8.26345	0.35598	0.257723
	0.467053	0.0687673	4.28033		0.467053	0.0687673		1.28498	3.24322		0.330348	0.285327		8.27199	0.330348	0.285327
	0.439449	0.0191459	4.27606		0.439449	0.0191459		1.27348	3.22087		0.32969	0.234062		8.31833	0.32969	0.234062
	0.435834	0.0546367	4.30005		0.435834	0.0546367		1.2955	3.21068		0.382598	0.185098		8.27692	0.382598	0.185098
	0.47494	0.0247324	4.27343		0.47494	0.0247324		1.31522	3.19787		0.371425	0.263309		8.30354	0.371425	0.263309
	0.426304	0.0763255	4.30629		0.426304	0.0763255		1.31127	3.22449		0.348093	0.206787		8.31373	0.348093	0.206787
	0.437149	0.0237465	4.257		0.437149	0.0237465		1.31259	3.25275		0.362552	0.257394		8.35546	0.362552	0.257394
	0.459823	0.0677814	4.27869		0.459823	0.0677814		1.29747	3.25735		0.297814	0.236363		8.37945	0.297814	0.236363
	0.435506	0.0687673	4.22512		0.435506	0.0687673		1.32245	3.25833		0.359923	0.262981		8.40081	0.359923	0.262981
	0.431891	0.0927564	4.24057		0.431891	0.0927564		1.29714	3.17552		0.350722	0.257066		8.47113	0.350722	0.257066
	0.457852	0.0221035	4.25963		0.457852	0.0221035		1.28334	3.23172		0.395743	0.257066		8.46258	0.395743	0.257066
	0.452265	0.0503646	4.29578		0.452265	0.0503646		1.27644	3.22974		0.327719	0.264295		8.39752	0.327719	0.264295
	0.430576	0.0559512	4.26817		0.430576	0.0559512		1.27151	3.20773		0.371425	0.205144		8.45601	0.371425	0.205144
	0.477569	0.0575943	4.24846		0.477569	0.0575943		1.28005	3.23895		0.36781	0.266924		8.5076	0.36781	0.266924
	0.452594	0.0296617	4.24517		0.452594	0.0296617		1.28236	3.1867		0.34415	0.265281		8.4823	0.34415	0.265281
	0.480526	0.0290044	4.30136		0.480526	0.0290044		1.29057	3.1397		0.388184	0.276454		8.47639	0.388184	0.276454
	0.424004	0.0480643	4.27376		0.424004	0.0480643		1.27775	3.22613		0.367153	0.275468		8.54342	0.367153	0.275468
	0.437149	0.0625235	4.2938		0.437149	0.0625235		1.29944	3.21003		0.379969	0.269553		8.49939	0.379969	0.269553
	0.413159	0.0566084	4.28395		0.413159	0.0566084		1.27743	3.15581		0.344807	0.249507		8.4984	0.344807	0.249507
	0.441749	0.0355768	4.27967		0.441749	0.0355768		1.28663	3.2281		0.372411	0.226504		8.57661	0.372411	0.226504
	0.471982	0.0717248	4.2731		0.471982	0.0717248		1.2886	3.19688		0.32969	0.276454		8.52009	0.32969	0.276454
	0.417432	0.056937	4.27836		0.417432	0.056937		1.30109	3.21167		0.314574	0.265281		8.55164	0.314574	0.265281
	0.431234	0.0615377	4.29808		0.431234	0.0615377		1.29221	3.22284		0.275797	0.268567		8.52568	0.275797	0.268567
	0.427947	0.0290044	4.24057		0.427947	0.0290044		1.31817	3.15088		0.354994	0.26068		8.54967	0.354994	0.26068
	0.455223	0.0592373	4.22841		0.455223	0.0592373		1.31127	3.16402		0.378326	0.278426		8.54309	0.378326	0.278426
	0.43452	0.0736966	4.22677		0.43452	0.0736966		1.28433	3.14595		0.303072	0.239649		8.62163	0.303072	0.239649
	0.419403	0.0286758	4.22841		0.419403	0.0286758		1.31193	3.16468		0.342507	0.237349		8.61407	0.342507	0.237349
	0.44865	0.0352482	4.23367		0.44865	0.0352482		1.31489	3.20871		0.369782	0.302415		8.59961	0.369782	0.302415
	0.468696	0.0658097	4.24418		0.468696	0.0658097		1.26461	3.17881		0.347764	0.23932		8.57661	0.347764	0.23932
	0.435506	0.0267041	4.25536		0.435506	0.0267041		1.2748	3.16435		0.350065	0.242606		8.64003	0.350065	0.242606
	0.434191	0.0562798	4.25766		0.434191	0.0562798		1.31325	3.15153		0.328047	0.26791		8.68472	0.328047	0.26791
	0.451279	0.0230893	4.20771		0.451279	0.0230893		1.32376	3.19064		0.312602	0.265938		8.59666	0.312602	0.265938
	0.437149	0.0336051	4.22118		0.437149	0.0336051		1.30766	3.19491		0.35598	0.249507		8.62426	0.35598	0.249507
	0.466396	0.0273613	4.21724		0.466396	0.0273613		1.27283	3.19195		0.406916	0.1989		8.62097	0.406916	0.1989
	0.448322	0.0490502	4.18898		0.448322	0.0490502		1.2955	3.17158		0.363209	0.233405		8.63839	0.363209	0.233405
	0.418089	0.0592373	4.21395		0.418089	0.0592373		1.30832	3.14693		0.336263	0.244907		8.619	0.336263	0.244907
	0.467382	0.0641666	4.27047		0.467382	0.0641666		1.26362	3.14858		0.35598	0.25838		8.64792	0.35598	0.25838
	0.457194	0.0497074	4.21625		0.457194	0.0497074		1.26461	3.15416		0.349408	0.243264		8.68801	0.349408	0.243264
	0.433862	0.0280186	4.24944		0.433862	0.0280186		1.2955	3.13806		0.328047	0.269882		8.65778	0.328047	0.269882
	0.464753	0.0395202	4.22118		0.464753	0.0395202		1.28005	3.09665		0.295185	0.251151		8.69064	0.295185	0.251151
	0.451936	0.0543081	4.21264		0.451936	0.0543081		1.24194	3.10388		0.349079	0.243264		8.65548	0.349079	0.243264
	0.430576	0.0786258	4.26423		0.430576	0.0786258		1.30273	3.11999		0.340206	0.226176		8.68012	0.340206	0.226176
	0.418746	0.0516791	4.22282		0.418746	0.0516791		1.307	3.15581		0.338892	0.272182		8.72219	0.338892	0.272182
	0.415131	0.0562798	4.22315		0.415131	0.0562798		1.28761	3.16172		0.349079	0.266267		8.68538	0.349079	0.266267
	0.419732	0.0326192	4.2363		0.419732	0.0326192		1.29649	3.15843		0.359595	0.238992		8.7235	0.359595	0.238992
	0.41776	0.0339337	4.24648		0.41776	0.0339337		1.30174	3.15285		0.361895	0.232091		8.68538	0.361895	0.232091
	0.445035	0.0129021	4.22677		0.445035	0.0129021		1.3047	3.12426		0.344807	0.263967		8.70017	0.344807	0.263967
	0.434848	0.0516791	4.23038		0.434848	0.0516791		1.31127	3.1443		0.380626	0.27974		8.68374	0.380626	0.27974
	0.401329	0.0740252	4.22874		0.401329	0.0740252		1.28794	3.09008		0.389828	0.205801		8.6913	0.389828	0.205801
	0.429262	0.0523364	4.25437		0.429262	0.0523364		1.28367	3.11801		0.36551	0.256737		8.7695	0.36551	0.256737
	0.424661	0.0612091	4.22315		0.424661	0.0612091		1.27447	3.10848		0.370439	0.261995		8.76162	0.370439	0.261995
	0.441749	0.036234	4.20311		0.441749	0.036234		1.3208	3.17651		0.330676	0.270539		8.73566	0.330676	0.270539
	0.3941	0.025061	4.2432		0.3941	0.025061		1.2955	3.16435		0.356308	0.272182		8.80499	0.356308	0.272182
	0.415131	0.0273613	4.27179		0.415131	0.0273613		1.27151	3.16698		0.384898	0.21566		8.79152	0.384898	0.21566
	0.464424	0.0497074	4.25339		0.464424	0.0497074		1.28334	3.14726		0.321146	0.232091		8.81682	0.321146	0.232091
	0.470339	0.0244038	4.22118		0.470339	0.0244038		1.2863	3.15548		0.311945	0.242606		8.75603	0.311945	0.242606
	0.431234	0.0454354	4.22085		0.431234	0.0454354		1.2702	3.12656		0.311288	0.197586		8.79152	0.311288	0.197586
	0.42006	0.0651525	4.19949		0.42006	0.0651525		1.27907	3.16073		0.311288	0.222232		8.73336	0.311288	0.222232
	0.447993	0.0592373	4.18635		0.447993	0.0592373		1.307	3.1167		0.366167	0.251808		8.80171	0.366167	0.251808
	0.432219	0.0368913	4.18405		0.432219	0.0368913		1.29156	3.15909		0.367482	0.264953		8.79021	0.367482	0.264953
	0.450951	0.0733679	4.2225		0.450951	0.0733679		1.31062	3.12853		0.35828	0.259037		8.7511	0.35828	0.259037
	0.421704	0.0477357	4.22348		0.421704	0.0477357		1.3185	3.14332		0.371754	0.294528		8.79842	0.371754	0.294528
	0.434848	0.0700818	4.20902		0.434848	0.0700818		1.3254	3.08417		0.357952	0.276454		8.78199	0.357952	0.276454
	0.414145	0.0411633	4.19029		0.414145	0.0411633		1.30339	3.09403		0.33692	0.250822		8.82537	0.33692	0.250822
	0.423018	0.0966999	4.19883		0.423018	0.0966999		1.25442	3.14069		0.381283	0.249179		8.75965	0.381283	0.249179
	0.444707	0.0434637	4.15841		0.444707	0.0434637		1.28334	3.11243		0.31556	0.286313		8.81551	0.31556	0.286313
	0.449965	0.075011	4.18438		0.449965	0.075011		1.284	3.11834		0.303401	0.284012		8.8211	0.303401	0.284012
	0.41546	0.0454354	4.16992		0.41546	0.0454354		1.2817	3.13477		0.375697	0.252465		8.81584	0.375697	0.252465
	0.436163	0.0434637	4.16236		0.436163	0.0434637		1.27513	3.119		0.333634	0.267253		8.87269	0.333634	0.267253
	0.418417	0.0572656	4.19785		0.418417	0.0572656		1.27414	3.10618		0.34645	0.278426		8.84311	0.34645	0.278426
	0.454237	0.0378771	4.18799		0.454237	0.0378771		1.27808	3.11703		0.338892	0.238006		8.79415	0.338892	0.238006
	0.444707	0.0355768	4.19062		0.444707	0.0355768		1.27611	3.14069		0.36551	0.264295		8.82964	0.36551	0.264295
	0.437477	0.0168456	4.21297		0.437477	0.0168456		1.31587	3.1144		0.386213	0.233405		8.79514	0.386213	0.233405
	0.430248	0.0109304	4.17583		0.430248	0.0109304		1.27545	3.119		0.347764	0.23702		8.88156	0.347764	0.23702
	0.430905	0.0359054	4.19325		0.430905	0.0359054		1.31095	3.18144		0.367482	0.241621		8.78364	0.367482	0.241621
	0.437806	0.0444495	4.20344		0.437806	0.0444495		1.31062	3.06511		0.349079	0.282698		8.86382	0.349079	0.282698
	0.417432	0.0769827	4.18405		0.417432	0.0769827		1.28564	3.12787		0.348422	0.290913		8.79382	0.348422	0.290913
	0.432548	0.0648239	4.14954		0.432548	0.0648239		1.25804	3.13937		0.384898	0.280726		8.84706	0.384898	0.280726
	0.434191	0.0835551	4.20475		0.434191	0.0835551		1.29057	3.10487		0.366496	0.241621		8.80532	0.366496	0.241621
	0.452265	0.0618663	4.18372		0.452265	0.0618663		1.28236	3.12853		0.369782	0.258052		8.81912	0.369782	0.258052
	0.44405	0.0694245	4.21527		0.44405	0.0694245		1.2932	3.10586		0.310959	0.26561		8.81025	0.310959	0.26561
	0.450951	0.0559512	4.17156		0.450951	0.0559512		1.2817	3.12492		0.390813	0.255094		8.82537	0.390813	0.255094
	0.438463	0.0490502	4.20081		0.438463	0.0490502		1.30766	3.09534		0.291242	0.266596		8.82208	0.291242	0.266596
	0.405273	0.0615377	4.18536		0.405273	0.0615377		1.28334	3.09501		0.303072	0.232748		8.82175	0.303072	0.232748
	0.404287	0.0549653	4.18208		0.404287	0.0549653		1.28367	3.11046		0.345135	0.261666		8.84278	0.345135	0.261666
	0.442078	0.0677814	4.17747		0.442078	0.0677814		1.29484	3.11736		0.357623	0.283355		8.81945	0.357623	0.283355
	0.421375	0.0520077	4.19883		0.421375	0.0520077		1.24391	3.16534		0.311945	0.239978		8.85987	0.311945	0.239978
	0.447007	0.0313048	4.1387		0.447007	0.0313048		1.25804	3.12097		0.384898	0.292885		8.85856	0.384898	0.292885
	0.419732	0.081912	4.17912		0.419732	0.081912		1.26757	3.06379		0.356308	0.265281		8.8487	0.356308	0.265281
	0.424661	0.0907847	4.15447		0.424661	0.0907847		1.29813	3.1167		0.33692	0.303401		8.87203	0.33692	0.303401
	0.401001	0.0733679	4.16072		0.401001	0.0733679		1.27381	3.12689		0.301429	0.249507		8.8211	0.301429	0.249507
	0.446021	0.0720535	4.17682		0.446021	0.0720535		1.25705	3.10717		0.331333	0.291242		8.80039	0.331333	0.291242
	0.422361	0.0336051	4.1755		0.422361	0.0336051		1.32475	3.11966		0.350722	0.214017		8.91015	0.350722	0.214017
	0.433205	0.0424778	4.14461		0.433205	0.0424778		1.28663	3.08384		0.369125	0.272839		8.93151	0.369125	0.272839
	0.375697	0.038863	4.15677		0.375697	0.038863		1.27052	3.10717		0.335606	0.307673		8.85954	0.335606	0.307673
	0.454237	0.0332765	4.19029		0.454237	0.0332765		1.28827	3.12459		0.34875	0.2988		8.83786	0.34875	0.2988
	0.422689	0.0533222	4.15119		0.422689	0.0533222		1.29419	3.10356		0.297814	0.26068		8.89339	0.297814	0.26068
	0.403958	0.0470785	4.14921		0.403958	0.0470785		1.30864	3.08384		0.300443	0.265281		8.91278	0.300443	0.265281
	0.438135	0.0372199	4.14001		0.438135	0.0372199		1.29484	3.09928		0.35828	0.227161		8.94005	0.35828	0.227161
	0.417103	0.0454354	4.11274		0.417103	0.0454354		1.32278	3.11144		0.301758	0.238334		8.87236	0.301758	0.238334
	0.409545	0.0194745	4.14264		0.409545	0.0194745		1.28498	3.07102		0.337249	0.291242		8.87006	0.337249	0.291242
	0.391471	0.0444495	4.15414		0.391471	0.0444495		1.30667	3.08482		0.300115	0.273168		8.87532	0.300115	0.273168
	0.418746	0.0217748	4.09861		0.418746	0.0217748		1.29419	3.0868		0.341849	0.252465		8.87334	0.341849	0.252465
	0.423018	0.0322906	4.14363		0.423018	0.0322906		1.28236	3.1167		0.323447	0.252465		8.89208	0.323447	0.252465
	0.398372	0.0161883	4.18668		0.398372	0.0161883		1.27118	3.07431		0.371096	0.239978		8.88452	0.371096	0.239978
	0.430248	0.0211176	4.15349		0.430248	0.0211176		1.27315	3.08614		0.36781	0.270539		8.9039	0.36781	0.270539
	0.447007	0.0421492	4.12555		0.447007	0.0421492		1.29254	3.09074		0.355323	0.218617		8.88616	0.355323	0.218617
	0.463767	0.0631808	4.15053		0.463767	0.0631808		1.25574	3.08942		0.356637	0.266596		8.86316	0.356637	0.266596
	0.436163	0.0572656	4.15119		0.436163	0.0572656		1.31127	3.14759		0.356308	0.292885		8.91146	0.356308	0.292885
	0.428933	0.0487216	4.16104		0.428933	0.0487216		1.3093	3.03487		0.363538	0.252794		8.92724	0.363538	0.252794
	0.436491	0.0408347	4.1249		0.436491	0.0408347		1.31226	3.07727		0.335277	0.254437		8.93249	0.335277	0.254437
	0.438463	0.0395202	4.09795		0.438463	0.0395202		1.28926	3.07825		0.367482	0.23932		8.87269	0.367482	0.23932
	0.430248	0.0372199	4.14396		0.430248	0.0372199		1.28367	3.10158		0.304058	0.280398		8.90686	0.304058	0.280398
	0.43682	0.0506933	4.14889		0.43682	0.0506933		1.29977	3.07464		0.337249	0.236363		8.95813	0.337249	0.236363
	0.448979	0.0201317	4.10616		0.448979	0.0201317		1.26198	3.06215		0.281712	0.299786		8.89766	0.281712	0.299786
	0.454237	0.02769	4.09368		0.454237	0.02769		1.32245	3.07858		0.33462	0.236034		8.93151	0.33462	0.236034
	0.440106	0.0352482	4.12917		0.440106	0.0352482		1.29221	3.08055		0.333962	0.303401		8.95582	0.333962	0.303401
	0.433862	0.0290044	4.13278		0.433862	0.0290044		1.27217	3.09731		0.335934	0.252136		8.94202	0.335934	0.252136
	0.435834	0.084541	4.11142		0.435834	0.084541		1.2863	3.06675		0.365838	0.264295		8.89602	0.365838	0.264295
	0.401329	0.0148738	4.11241		0.401329	0.0148738		1.26001	3.07825		0.347107	0.213688		8.93808	0.347107	0.213688
	0.466067	0.0497074	4.10649		0.466067	0.0497074		1.30799	3.04999		0.299457	0.279083		8.94268	0.299457	0.279083
	0.440435	0.0424778	4.11602		0.440435	0.0424778		1.29221	3.08318		0.360909	0.299786		8.86119	0.360909	0.299786
	0.443721	0.0684387	4.10485		0.443721	0.0684387		1.31817	3.11144		0.36551	0.293214		8.92362	0.36551	0.293214
	0.406259	0.0322906	4.11405		0.406259	0.0322906		1.32113	3.04309		0.314574	0.327061		8.90292	0.314574	0.327061
	0.435834	0.0336051	4.11602		0.435834	0.0336051		1.30109	3.11276		0.325747	0.249179		8.92395	0.325747	0.249179
	0.430905	0.0493788	4.11274		0.430905	0.0493788		1.32409	3.0799		0.35598	0.242278		8.87072	0.35598	0.242278
	0.442078	0.0644952	4.08842		0.442078	0.0644952		1.27217	3.05262		0.363538	0.289928		8.96043	0.363538	0.289928
	0.456537	0.0408347	4.15151		0.456537	0.0408347		1.32113	3.08614		0.306358	0.231433		8.91869	0.306358	0.231433
	0.415788	0.00895871	4.10616		0.415788	0.00895871		1.29386	3.07004		0.346779	0.273497		8.92986	0.346779	0.273497
	0.431562	0.0217748	4.08973		0.431562	0.0217748		1.30864	3.07004		0.317532	0.262981		8.94531	0.317532	0.262981
	0.410859	0.0493788	4.09138		0.410859	0.0493788		1.28531	3.09074		0.342507	0.235377		8.91705	0.342507	0.235377
	0.421704	0.043135	4.10649		0.421704	0.043135		1.30832	3.07792		0.310959	0.238663		8.95648	0.310959	0.238663
	0.446679	0.0497074	4.11044		0.446679	0.0497074		1.28991	3.08088		0.324761	0.217303		8.95648	0.324761	0.217303
	0.414474	0.0677814	4.07955		0.414474	0.0677814		1.284	3.08581		0.350065	0.278426		8.92198	0.350065	0.278426
	0.42499	0.0342623	4.071		0.42499	0.0342623		1.30569	3.10947		0.37964	0.271854		8.95254	0.37964	0.271854
	0.416446	0.0520077	4.09861		0.416446	0.0520077		1.30043	3.12952		0.32016	0.25608		8.92296	0.32016	0.25608
	0.429262	0.0559512	4.11635		0.429262	0.0559512		1.33559	3.05689		0.344478	0.237349		8.9417	0.344478	0.237349
	0.401986	0.0667956	4.1387		0.401986	0.0667956		1.30634	3.05361		0.308002	0.295843		8.91639	0.308002	0.295843
	0.440435	0.0546367	4.08743		0.440435	0.0546367		1.31883	3.03159		0.366824	0.22026		8.94038	0.366824	0.22026
	0.413817	0.0868413	4.0664		0.413817	0.0868413		1.27578	3.11341		0.359595	0.266924		8.95451	0.359595	0.266924
	0.424661	0.0283472	4.09203		0.424661	0.0283472		1.3162	3.06379		0.357623	0.248522		8.95484	0.357623	0.248522
	0.401329	0.0221035	4.11865		0.401329	0.0221035		1.33493	3.06445		0.321146	0.213031		8.91738	0.321146	0.213031
	0.432877	0.0184886	4.11504		0.432877	0.0184886		1.31226	3.10158		0.282369	0.240306		8.92724	0.282369	0.240306
	0.409873	0.0602232	4.10354		0.409873	0.0602232		1.32573	3.10158		0.357623	0.257394		8.92986	0.357623	0.257394
	0.446021	0.0290044	4.08908		0.446021	0.0290044		1.3024	3.08581		0.307016	0.252136		8.95352	0.307016	0.252136
	0.44405	0.0612091	4.10189		0.44405	0.0612091		1.27447	3.07135		0.304058	0.232419		8.94367	0.304058	0.232419
	0.381283	0.0825693	4.13311		0.381283	0.0825693		1.31489	3.10553		0.364853	0.279412		8.96798	0.364853	0.279412
	0.401658	0.0299903	4.07823		0.401658	0.0299903		1.27808	3.0868		0.363209	0.288284		8.96733	0.363209	0.288284
	0.429262	0.0161883	4.10255		0.429262	0.0161883		1.30273	3.05985		0.348422	0.268239		8.93348	0.348422	0.268239
	0.418746	0.0293331	4.07823		0.418746	0.0293331		1.29616	3.09304		0.319175	0.287299		8.9555	0.319175	0.287299
	0.390156	0.050036	4.09926		0.390156	0.050036		1.32376	3.02732		0.331991	0.309973		8.94892	0.331991	0.309973
	0.456209	0.0690959	4.06377		0.456209	0.0690959		1.29156	3.04999		0.338563	0.238992		8.92001	0.338563	0.238992
	0.408887	0.0497074	4.0687		0.408887	0.0497074		1.29747	3.07299		0.27744	0.24425		8.94334	0.27744	0.24425
	0.390485	0.0418206	4.05654		0.390485	0.0418206		1.28663	3.04243		0.331662	0.268567		8.99723	0.331662	0.268567
	0.397057	0.0467498	4.04406		0.397057	0.0467498		1.31423	3.04605		0.287299	0.238334		8.98704	0.287299	0.238334
	0.411188	0.0293331	4.06706		0.411188	0.0293331		1.28137	3.04703		0.376354	0.245893		8.91442	0.376354	0.245893
	0.431891	0.0480643	4.0411		0.431891	0.0480643		1.3185	3.09173		0.284012	0.266924		8.95813	0.284012	0.266924
	0.419732	0.0733679	4.08349		0.419732	0.0733679		1.31719	3.10126		0.299129	0.295185		8.94038	0.299129	0.295185
	0.425318	0.0247324	4.10518		0.425318	0.0247324		1.29057	3.04145		0.32969	0.219932		8.91475	0.32969	0.219932
	0.40593	0.0424778	4.05753		0.40593	0.0424778		1.2932	3.03487		0.354008	0.295843		8.95057	0.354008	0.295843
	0.442407	0.050036	4.02993		0.442407	0.050036		1.32935	3.04178		0.365838	0.281383		8.96404	0.365838	0.281383
	0.446021	0.0556225	4.0825		0.446021	0.0556225		1.32212	3.05656		0.362552	0.302415		8.92789	0.362552	0.302415
	0.435177	0.0411633	4.05129		0.435177	0.0411633		1.31785	3.05656		0.353022	0.277769		9.00249	0.353022	0.277769
	0.400343	0.0418206	4.09664		0.400343	0.0418206		1.25179	3.03422		0.365838	0.277111		8.98244	0.365838	0.277111
	0.415131	0.0483929	4.06739		0.415131	0.0483929		1.30109	3.08417		0.32509	0.247864		8.99493	0.32509	0.247864
	0.411516	0.070739	4.06706		0.411516	0.070739		1.29189	3.11177		0.357294	0.286641		8.99756	0.357294	0.286641
	0.445035	0.0309762	4.04997		0.445035	0.0309762		1.3231	3.06905		0.293871	0.245893		8.98113	0.293871	0.245893
	0.433205	0.0368913	4.0802		0.433205	0.0368913		1.29156	3.1121		0.345135	0.218617		8.99986	0.345135	0.218617
	0.410202	0.0444495	4.08185		0.410202	0.0444495		1.30602	3.10126		0.404944	0.23702		8.95747	0.404944	0.23702
	0.421046	0.0546367	4.07232		0.421046	0.0546367		1.30897	3.08811		0.375697	0.293871		8.96273	0.375697	0.293871
	0.374711	0.050036	4.05786		0.374711	0.050036		1.29879	3.09271		0.328047	0.273168		8.95385	0.328047	0.273168
	0.418746	0.0102732	4.06969		0.418746	0.0102732		1.28268	3.06248		0.348093	0.282041		8.96831	0.348093	0.282041
	0.467382	0.0322906	4.08513		0.467382	0.0322906		1.30766	3.05262		0.32739	0.261995		8.98376	0.32739	0.261995
	0.42729	0.0510219	4.02204		0.42729	0.0510219		1.29944	3.04473		0.340863	0.281055		8.99329	0.340863	0.281055
	0.409873	0.038863	4.04241		0.409873	0.038863		1.33296	3.08121		0.372739	0.27514		8.95977	0.372739	0.27514
	0.433862	0.0326192	4.05753		0.433862	0.0326192		1.3093	3.0983		0.370439	0.271525		9.01169	0.370439	0.271525
	0.414474	0.0194745	4.08218		0.414474	0.0194745		1.29386	3.08417		0.348422	0.272182		8.99033	0.348422	0.272182
	0.412502	0.00271496	4.04669		0.412502	0.00271496		1.29057	3.05722		0.296829	0.262981		8.91113	0.296829	0.262981
	0.419075	0.0391916	4.04208		0.419075	0.0391916		1.30404	3.04342		0.278426	0.26791		8.94334	0.278426	0.26791
	0.378655	0.0418206	4.04406		0.378655	0.0418206		1.30076	3.09797		0.305373	0.262981		8.97094	0.305373	0.262981
	0.397386	0.0316334	4.05227		0.397386	0.0316334		1.30733	3.1236		0.327061	0.27021		8.97981	0.327061	0.27021
	0.392785	0.0253896	4.03223		0.392785	0.0253896		1.30109	3.09665		0.326076	0.27514		8.96108	0.326076	0.27514
	0.402315	0.0520077	4.0572		0.402315	0.0520077		1.30569	3.02502		0.34645	0.25608		8.95484	0.34645	0.25608
	0.423347	0.0424778	4.0342		0.423347	0.0424778		1.30043	3.01516		0.346779	0.282698		8.97784	0.346779	0.282698
	0.434848	0.0237465	4.03321		0.434848	0.0237465		1.30503	3.05558		0.344807	0.260023		8.97587	0.344807	0.260023
	0.416117	0.0240752	4.06114		0.416117	0.0240752		1.29747	3.04605		0.335277	0.23472		8.9555	0.335277	0.23472
	0.402315	0.0648239	4.0112		0.402315	0.0648239		1.25574	3.06116		0.353351	0.274154		8.95681	0.353351	0.274154
	0.418089	0.0621949	4.01415		0.418089	0.0621949		1.30372	3.02469		0.297814	0.280398		8.9486	0.297814	0.280398
	0.418417	0.0585801	4.06213		0.418417	0.0585801		1.3047	3.05821		0.355323	0.239649		9.0153	0.355323	0.239649
	0.433534	0.0858554	3.98556		0.433534	0.0858554		1.3047	3.03257		0.35598	0.282369		8.99756	0.35598	0.282369
	0.427947	0.0303189	4.04373		0.427947	0.0303189		1.2886	3.03849		0.376683	0.269882		9.05276	0.376683	0.269882
	0.433205	0.0349196	4.01251		0.433205	0.0349196		1.2978	3.07694		0.337906	0.279083		8.9509	0.337906	0.279083
	0.416446	0.0395202	3.99739		0.416446	0.0395202		1.32935	3.0145		0.347107	0.268567		8.99723	0.347107	0.268567
	0.400015	0.0598946	4.01218		0.400015	0.0598946		1.32113	3.07234		0.30833	0.288284		9.00807	0.30833	0.288284
	0.395743	0.0552939	4.0181		0.395743	0.0552939		1.28728	3.05295		0.300115	0.219275		9.02582	0.300115	0.219275
	0.398372	0.0592373	4.01612		0.398372	0.0592373		1.30634	3.07168		0.353022	0.290585		8.9923	0.353022	0.290585
	0.445693	0.0533222	4.00659		0.445693	0.0533222		1.31325	3.09435		0.325418	0.272511		8.99394	0.325418	0.272511
	0.380298	0.0589087	3.99706		0.380298	0.0589087		1.27677	3.07694		0.30833	0.228476		9.02089	0.30833	0.228476
	0.418089	0.0316334	4.00002		0.418089	0.0316334		1.31916	3.05591		0.321804	0.309973		9.00774	0.321804	0.309973
	0.41776	0.0575943	4.00265		0.41776	0.0575943		1.30667	3.09435		0.332648	0.270868		9.00084	0.332648	0.270868
	0.439449	0.0283472	4.01185		0.439449	0.0283472		1.30569	3.05328		0.321146	0.280069		8.99329	0.321146	0.280069
	0.406259	0.0575943	3.98819		0.406259	0.0575943		1.30536	3.07464		0.32969	0.233405		8.97226	0.32969	0.233405
	0.394757	0.0467498	3.97308		0.394757	0.0467498		1.32902	3.07004		0.352036	0.266596		8.99822	0.352036	0.266596
	0.428276	0.02769	4.00364		0.428276	0.02769		1.3001	3.06018		0.290913	0.288942		8.98047	0.290913	0.288942
	0.426633	0.0444495	3.99706		0.426633	0.0444495		1.27118	3.08384		0.341521	0.23702		9.06788	0.341521	0.23702
	0.417103	0.0365627	4.00035		0.417103	0.0365627		1.33263	3.07825		0.341192	0.269553		8.98244	0.341192	0.269553
	0.413817	0.00895871	3.98162		0.413817	0.00895871		1.35235	3.06905		0.344478	0.274154		8.98277	0.344478	0.274154
	0.426633	0.0648239	4.01612		0.426633	0.0648239		1.27907	2.98788		0.350722	0.268239		8.99493	0.350722	0.268239
	0.404944	0.0372199	3.99345		0.404944	0.0372199		1.32836	3.06116		0.321804	0.260352		8.94925	0.321804	0.260352
	0.391142	0.0368913	3.99444		0.391142	0.0368913		1.32968	3.0891		0.331662	0.220918		8.96141	0.331662	0.220918
	0.397386	0.0313048	4.01284		0.397386	0.0313048		1.2794	3.09337		0.28697	0.278426		8.99263	0.28697	0.278426
	0.381941	0.038863	3.95895		0.381941	0.038863		1.3024	3.07069		0.369453	0.226833		8.99493	0.369453	0.226833
	0.394428	0.0654811	3.96552		0.394428	0.0654811		1.29681	3.08252		0.337906	0.255094		8.98277	0.337906	0.255094
	0.431562	0.045764	3.9665		0.431562	0.045764		1.30306	3.04999		0.356637	0.254765		8.97456	0.356637	0.254765
	0.392128	0.0313048	3.98556		0.392128	0.0313048		1.26822	3.01384		0.357952	0.276454		8.97127	0.357952	0.276454
	0.410531	0.034591	3.99476		0.410531	0.034591		1.29189	3.04966		0.390156	0.254108		9.01695	0.390156	0.254108
	0.42499	0.0441209	3.95796		0.42499	0.0441209		1.30076	3.07431		0.313917	0.255751		9.00347	0.313917	0.255751
	0.391471	0.0605518	3.99246		0.391471	0.0605518		1.31522	3.04178		0.337577	0.279083		8.95977	0.337577	0.279083
	0.396071	0.0434637	3.98261		0.396071	0.0434637		1.31916	3.08285		0.317203	0.304715		8.99362	0.317203	0.304715
	0.440435	0.0411633	4.00232		0.440435	0.0411633		1.31193	2.99675		0.345793	0.27744		9.0199	0.345793	0.27744
	0.397386	0.0490502	3.9596		0.397386	0.0490502		1.30799	3.04243		0.329033	0.305373		8.9969	0.329033	0.305373
	0.393771	0.0490502	3.9734		0.393771	0.0490502		1.32442	3.05689		0.394757	0.234062		8.99197	0.394757	0.234062
	0.426961	0.0483929	3.95007		0.426961	0.0483929		1.29254	3.09731		0.350722	0.307673		9.00282	0.350722	0.307673
	0.371096	0.0723821	3.98326		0.371096	0.0723821		1.30109	3.06642		0.334948	0.287956		9.01596	0.334948	0.287956
	0.390813	0.0556225	4.00791		0.390813	0.0556225		1.31883	3.02009		0.321475	0.285656		9.02286	0.321475	0.285656
	0.3964	0.0135594	3.99805		0.3964	0.0135594		1.34874	3.00497		0.384898	0.276126		9.03896	0.384898	0.276126
	0.406916	0.0313048	3.99345		0.406916	0.0313048		1.31292	3.0329		0.356637	0.277769		9.06492	0.356637	0.277769
	0.393442	0.0299903	3.955		0.393442	0.0299903		1.30306	3.03225		0.331662	0.307673		8.99329	0.331662	0.307673
	0.413159	0.0700818	3.94942		0.413159	0.0700818		1.28334	3.03685		0.282041	0.253122		9.01037	0.282041	0.253122
	0.396729	0.0723821	3.99115		0.396729	0.0723821		1.31949	3.04802		0.313588	0.289599		9.00117	0.313588	0.289599
	0.404615	0.0549653	3.97702		0.404615	0.0549653		1.28137	3.07069		0.314903	0.24655		8.96437	0.314903	0.24655
	0.391799	0.0421492	3.93101		0.391799	0.0421492		1.28071	3.01844		0.349736	0.28927		8.98967	0.349736	0.28927
	0.389499	0.070739	3.98951		0.389499	0.070739		1.29813	3.04276		0.350393	0.263638		9.05079	0.350393	0.263638
	0.368467	0.0368913	3.92214		0.368467	0.0368913		1.31127	3.04243		0.299129	0.273497		9.00873	0.299129	0.273497
	0.415788	0.038863	3.96026		0.415788	0.038863		1.32475	3.09304		0.307344	0.260023		9.02943	0.307344	0.260023
	0.427947	0.0391916	3.96125		0.427947	0.0391916		1.32705	3.09041		0.341521	0.310959		9.05671	0.341521	0.310959
	0.410859	0.043135	3.94514		0.410859	0.043135		1.31522	3.07299		0.343492	0.301429		9.0153	0.343492	0.301429
	0.400015	0.0477357	3.9665		0.400015	0.0477357		1.31062	3.07628		0.381941	0.211388		9.01103	0.381941	0.211388
	0.424333	0.0240752	3.97866		0.424333	0.0240752		1.31785	3.09994		0.337906	0.278755		8.9923	0.337906	0.278755
	0.398043	0.0474071	3.9596		0.398043	0.0474071		1.28926	3.04309		0.361566	0.274154		9.02352	0.361566	0.274154
	0.388184	0.0194745	3.92477		0.388184	0.0194745		1.29221	3.08318		0.290585	0.260352		9.01037	0.290585	0.260352
	0.379969	0.0602232	3.91984		0.379969	0.0602232		1.29057	3.0306		0.342507	0.30833		9.01136	0.342507	0.30833
	0.367153	0.0339337	3.9274		0.367153	0.0339337		1.31029	3.11276		0.33462	0.226504		9.01169	0.33462	0.226504
	0.422032	0.0618663	3.96519		0.422032	0.0618663		1.32015	3.05623		0.337577	0.262324		8.96338	0.337577	0.262324
	0.382598	0.050036	3.9481		0.382598	0.050036		1.34874	3.07529		0.31786	0.284998		8.96798	0.31786	0.284998
	0.380298	0.0671242	3.94547		0.380298	0.0671242		1.3001	3.05163		0.338892	0.274811		9.03272	0.338892	0.274811
	0.412831	0.0454354	3.94317		0.412831	0.0454354		1.33329	3.1098		0.316217	0.299457		8.99657	0.316217	0.299457
	0.376683	0.0671242	3.96782		0.376683	0.0671242		1.28663	3.11111		0.334291	0.279412		8.9923	0.334291	0.279412
	0.416117	0.0375485	3.94744		0.416117	0.0375485		1.32705	3.06346		0.298472	0.274154		8.98639	0.298472	0.274154
	0.396729	0.0477357	3.96749		0.396729	0.0477357		1.28991	3.0421		0.316217	0.267253		8.98409	0.316217	0.267253
	0.390485	0.011259	3.95993		0.390485	0.011259		1.28367	3.08318		0.303072	0.261338		9.03075	0.303072	0.261338
	0.390813	0.0329479	3.90834		0.390813	0.0329479		1.31423	3.03882		0.304387	0.269882		9.04028	0.304387	0.269882
	0.390156	0.0746824	3.92345		0.390156	0.0746824		1.32146	2.99117		0.325747	0.28697		9.02122	0.325747	0.28697
	0.415131	0.0618663	3.87876		0.415131	0.0618663		1.30963	3.06379		0.341192	0.250493		9.02188	0.341192	0.250493
	0.388842	0.0546367	3.89782		0.388842	0.0546367		1.30339	3.04802		0.372082	0.26561		8.9739	0.372082	0.26561
	0.406587	0.0368913	3.93134		0.406587	0.0368913		1.29254	3.01483		0.332977	0.274811		8.96568	0.332977	0.274811
	0.385884	0.0329479	3.93726		0.385884	0.0329479		1.32015	3.02764		0.292885	0.290585		9.02319	0.292885	0.290585
	0.425647	0.0589087	3.93233		0.425647	0.0589087		1.33132	3.02929		0.318189	0.275797		9.03863	0.318189	0.275797
	0.3964	0.0628522	3.91261		0.3964	0.0628522		1.3093	3.07759		0.323775	0.266596		8.96963	0.323775	0.266596
	0.383255	0.0552939	3.91392		0.383255	0.0552939		1.29879	3.05788		0.327061	0.250822		8.95287	0.327061	0.250822
	0.399358	0.0309762	3.94942		0.399358	0.0309762		1.30142	3.04013		0.325747	0.227161		9.02549	0.325747	0.227161
	0.407573	0.0963712	3.93923		0.407573	0.0963712		1.30174	3.03783		0.308659	0.242935		8.98409	0.308659	0.242935
	0.410202	0.063838	3.9136		0.410202	0.063838		1.30273	3.05919		0.290585	0.26561		9.04126	0.290585	0.26561
	0.400672	0.038863	3.92477		0.400672	0.038863		1.28597	3.05032		0.315888	0.288284		8.98934	0.315888	0.288284
	0.423347	0.052665	3.90177		0.423347	0.052665		1.28334	3.04506		0.372739	0.296829		9.01202	0.372739	0.296829
	0.412502	0.0365627	3.94087		0.412502	0.0365627		1.31325	3.03027		0.354008	0.270539		9.01103	0.354008	0.270539
	0.412174	0.0523364	3.92575		0.412174	0.0523364		1.34676	3.01713		0.350065	0.262652		9.0268	0.350065	0.262652
	0.433862	0.070739	3.90374		0.433862	0.070739		1.3231	3.03323		0.318517	0.298143		9.02319	0.318517	0.298143
	0.385227	0.0529936	3.90242		0.385227	0.0529936		1.30273	3.02206		0.321804	0.273168		9.04093	0.321804	0.273168
	0.405601	0.0480643	3.90702		0.405601	0.0480643		1.31719	3.05361		0.316217	0.297486		8.9854	0.316217	0.297486
	0.371754	0.0339337	3.90078		0.371754	0.0339337		1.32475	3.07792		0.381941	0.262652		8.95615	0.381941	0.262652
	0.408559	0.045764	3.92345		0.408559	0.045764		1.32968	3.01319		0.326076	0.267253		9.00084	0.326076	0.267253
	0.405273	0.0336051	3.89749		0.405273	0.0336051		1.30536	3.02896		0.300443	0.281383		8.99263	0.300443	0.281383
	0.391142	0.0428064	3.92247		0.391142	0.0428064		1.32606	3.04769		0.323447	0.308002		9.00972	0.323447	0.308002
	0.383584	0.02769	3.88369		0.383584	0.02769		1.31555	3.03947		0.354665	0.308987		8.98211	0.354665	0.308987
	0.413488	0.0418206	3.89979		0.413488	0.0418206		1.30634	3.0329		0.370768	0.302415		8.97981	0.370768	0.302415
	0.429262	0.0267041	3.87909		0.429262	0.0267041		1.34282	3.04769		0.281383	0.260023		8.97653	0.281383	0.260023
	0.378326	0.0148738	3.9182		0.378326	0.0148738		1.33526	3.04408		0.320818	0.194957		8.98869	0.320818	0.194957
	0.400672	0.0355768	3.88172		0.400672	0.0355768		1.33493	3.04309		0.33692	0.251151		9.04389	0.33692	0.251151
	0.400015	0.0546367	3.88205		0.400015	0.0546367		1.32146	3.04079		0.345793	0.263638		8.96535	0.345793	0.263638
	0.387199	0.06811	3.90932		0.387199	0.06811		1.33592	3.07727		0.369453	0.260023		9.01695	0.369453	0.260023
	0.412502	0.0257183	3.89684		0.412502	0.0257183		1.33329	3.06051		0.312931	0.28467		9.03765	0.312931	0.28467
	0.41546	0.0437923	3.88271		0.41546	0.0437923		1.28367	3.00891		0.330676	0.231105		9.01267	0.330676	0.231105
	0.403958	0.0523364	3.88961		0.403958	0.0523364		1.284	3.08022		0.400343	0.297157		9.01662	0.400343	0.297157
	0.400015	0.0401775	3.90407		0.400015	0.0401775		1.31785	3.0352		0.34875	0.287627		9.01136	0.34875	0.287627
	0.367153	0.0631808	3.89421		0.367153	0.0631808		1.33822	3.01516		0.308987	0.276126		9.01366	0.308987	0.276126
	0.395414	0.0161883	3.88994		0.395414	0.0161883		1.28466	3.06314		0.335277	0.276126		8.97488	0.335277	0.276126
	0.3964	0.0536508	3.88402		0.3964	0.0536508		1.32475	3.01877		0.366496	0.256408		8.99493	0.366496	0.256408
	0.409216	0.100643	3.85116		0.409216	0.100643		1.33329	3.04309		0.333634	0.307016		8.967	0.333634	0.307016
	0.361566	0.0165169	3.84031		0.361566	0.0165169		1.32113	3.05426		0.293542	0.240963		9.00577	0.293542	0.240963
	0.401329	0.06811	3.85675		0.401329	0.06811		1.27348	3.07267		0.315888	0.267253		9.00084	0.315888	0.267253
	0.431234	0.00534391	3.8344		0.431234	0.00534391		1.32475	3.06314		0.388513	0.249507		8.94202	0.388513	0.249507
	0.393771	0.0700818	3.86069		0.393771	0.0700818		1.32738	3.05853		0.319175	0.260352		9.0107	0.319175	0.260352
	0.387856	0.0631808	3.87613		0.387856	0.0631808		1.30569	3.06478		0.311616	0.241949		8.95188	0.311616	0.241949
	0.409873	0.0313048	3.87252		0.409873	0.0313048		1.31193	3.02995		0.338234	0.250493		8.95845	0.338234	0.250493
	0.418089	0.0230893	3.87909		0.418089	0.0230893		1.32738	3.06642		0.301758	0.261995		9.00117	0.301758	0.261995
	0.376354	0.0217748	3.87581		0.376354	0.0217748		1.31292	3.06609		0.358937	0.254108		9.01037	0.358937	0.254108
	0.398043	0.0194745	3.86923		0.398043	0.0194745		1.31587	3.07727		0.341192	0.296829		9.01333	0.341192	0.296829
	0.426961	0.0674528	3.85872		0.426961	0.0674528		1.30404	3.01351		0.306358	0.240635		8.98211	0.306358	0.240635
	0.380626	0.059566	3.89092		0.380626	0.059566		1.31357	3.03487		0.335934	0.299786		9.01037	0.335934	0.299786
	0.378326	0.0418206	3.83867		0.378326	0.0418206		1.36385	3.07595		0.332319	0.298472		8.98211	0.332319	0.298472
	0.422032	0.0644952	3.84097		0.422032	0.0644952		1.30503	3.07332		0.319832	0.211059		9.01465	0.319832	0.211059
	0.376026	0.0414919	3.8206		0.376026	0.0414919		1.32179	3.07201		0.340535	0.260023		8.93479	0.340535	0.260023
	0.378326	0.0178314	3.83111		0.378326	0.0178314		1.32573	3.05985		0.373068	0.273497		9.01497	0.373068	0.273497
	0.385884	0.0441209	3.86003		0.385884	0.0441209		1.33592	3.0467		0.360909	0.235705		8.94038	0.360909	0.235705
	0.388184	0.0733679	3.85839		0.388184	0.0733679		1.2702	3.02764		0.345135	0.295843		9.04816	0.345135	0.295843
	0.425318	0.0368913	3.84919		0.425318	0.0368913		1.34348	3.0868		0.320818	0.23472		8.99362	0.320818	0.23472
	0.414145	0.0385344	3.83637		0.414145	0.0385344		1.31095	3.06182		0.311288	0.22026		8.99756	0.311288	0.22026
	0.423018	0.0332765	3.85675		0.423018	0.0332765		1.30733	3.07858		0.343492	0.255094		8.99263	0.343492	0.255094
	0.399686	0.0582515	3.85839		0.399686	0.0582515		1.29649	3.07858		0.299129	0.25838		9.04849	0.299129	0.25838
	0.415788	0.0641666	3.8551		0.415788	0.0641666		1.30372	3.06314		0.323118	0.273497		8.97423	0.323118	0.273497
	0.405273	0.0178314	3.84754		0.405273	0.0178314		1.25771	3.05196		0.331333	0.232419		9.04093	0.331333	0.232419
	0.417103	0.050036	3.88172		0.417103	0.050036		1.32705	3.04868		0.350065	0.290585		9.00939	0.350065	0.290585
	0.390813	0.0901275	3.87055		0.390813	0.0901275		1.31982	3.09895		0.324761	0.268567		8.99657	0.324761	0.268567
	0.374383	0.056937	3.80417		0.374383	0.056937		1.30404	3.08252		0.285656	0.219603		8.97028	0.285656	0.219603
	0.43912	0.0490502	3.8183		0.43912	0.0490502		1.31653	3.06741		0.295843	0.286313		8.99953	0.295843	0.286313
	0.386213	0.0572656	3.82717		0.386213	0.0572656		1.30207	3.04013		0.33462	0.274482		9.013	0.33462	0.274482
	0.381612	0.06811	3.83243		0.381612	0.06811		1.3001	3.07135		0.333962	0.218289		9.0038	0.333962	0.218289
	0.380626	0.0618663	3.79924		0.380626	0.0618663		1.30634	3.04473		0.334948	0.233734		9.02483	0.334948	0.233734
	0.3987	0.0454354	3.79891		0.3987	0.0454354		1.31555	3.04605		0.323118	0.262981		8.99	0.323118	0.262981
	0.385884	0.0329479	3.82454		0.385884	0.0329479		1.30766	3.07924		0.33922	0.255751		9.03305	0.33922	0.255751
	0.382927	0.0437923	3.84459		0.382927	0.0437923		1.32245	3.0467		0.34415	0.205473		8.98409	0.34415	0.205473
	0.380955	0.0592373	3.83407		0.380955	0.0592373		1.3185	3.01647		0.364853	0.287627		9.02746	0.364853	0.287627
	0.391142	0.0635094	3.82158		0.391142	0.0635094		1.31785	3.0799		0.340863	0.272511		8.96535	0.340863	0.272511
	0.37504	0.0618663	3.80647		0.37504	0.0618663		1.33789	3.01121		0.351379	0.277111		8.98671	0.351379	0.277111
	0.420389	0.0434637	3.82487		0.420389	0.0434637		1.2955	3.05985		0.375368	0.264295		9.01103	0.375368	0.264295
	0.366496	0.0536508	3.83374		0.366496	0.0536508		1.27973	3.0329		0.349736	0.242935		9.00052	0.349736	0.242935
	0.384898	0.038863	3.82487		0.384898	0.038863		1.31456	3.04408		0.296171	0.264624		9.0084	0.296171	0.264624
	0.381941	0.036234	3.80548		0.381941	0.036234		1.35432	3.01713		0.308002	0.278755		9.03009	0.308002	0.278755
	0.407902	0.0313048	3.84886		0.407902	0.0313048		1.35432	3.04605		0.240635	0.267253		8.9969	0.240635	0.267253
	0.379969	0.043135	3.79727		0.379969	0.043135		1.30634	3.06084		0.292228	0.317532		8.95484	0.292228	0.317532
	0.382269	0.0474071	3.84393		0.382269	0.0474071		1.3208	3.06544		0.360252	0.261338		9.02286	0.360252	0.261338
	0.405273	0.0224321	3.83341		0.405273	0.0224321		1.29714	3.04112		0.360252	0.255423		9.00446	0.360252	0.255423
	0.363867	0.013888	3.80745		0.363867	0.013888		1.30043	3.00957		0.336591	0.236363		9.00774	0.336591	0.236363
	0.401658	0.0214462	3.82454		0.401658	0.0214462		1.27513	3.04901		0.344478	0.309645		9.03403	0.344478	0.309645
	0.386541	0.0799403	3.84097		0.386541	0.0799403		1.30437	3.04802		0.308002	0.244907		9.01629	0.308002	0.244907
	0.403958	0.0687673	3.83308		0.403958	0.0687673		1.32409	3.05591		0.320489	0.26561		9.00249	0.320489	0.26561
	0.395743	0.0401775	3.81863		0.395743	0.0401775		1.33033	3.01812		0.335606	0.223547		8.9923	0.335606	0.223547
	0.404287	0.0161883	3.79957		0.404287	0.0161883		1.32047	3.05229		0.34875	0.230448		9.00742	0.34875	0.230448
	0.386541	0.0470785	3.81534		0.386541	0.0470785		1.32179	3.03323		0.302744	0.255094		9.0084	0.302744	0.255094
	0.401001	0.0625235	3.82093		0.401001	0.0625235		1.32113	3.06905		0.331005	0.237349		9.07051	0.331005	0.237349
	0.391799	0.0483929	3.81731		0.391799	0.0483929		1.30339	3.07037		0.32969	0.262652		9.00939	0.32969	0.262652
	0.397386	0.0355768	3.77525		0.397386	0.0355768		1.30043	3.06478		0.366167	0.245235		9.02023	0.366167	0.245235
	0.410202	0.038863	3.8045		0.410202	0.038863		1.32902	3.03356		0.32509	0.281712		9.00577	0.32509	0.281712
	0.387856	0.0503646	3.8298		0.387856	0.0503646		1.32376	3.01844		0.320489	0.283684		9.083	0.320489	0.283684
	0.418089	0.0480643	3.81501		0.418089	0.0480643		1.32113	3.00398		0.37504	0.26561		9.03436	0.37504	0.26561
	0.376683	0.0424778	3.80285		0.376683	0.0424778		1.33296	3.07497		0.368139	0.273168		9.05244	0.368139	0.273168
	0.378983	0.0572656	3.82454		0.378983	0.0572656		1.29681	3.08844		0.32509	0.259366		8.96798	0.32509	0.259366
	0.409873	0.0135594	3.78971		0.409873	0.0135594		1.3139	3.03717		0.352694	0.284341		9.02286	0.352694	0.284341
	0.376683	0.0477357	3.77623		0.376683	0.0477357		1.3609	3.05558		0.307016	0.228147		8.99822	0.307016	0.228147
	0.395414	0.0365627	3.77426		0.395414	0.0365627		1.30109	3.01647		0.352036	0.256737		9.04192	0.352036	0.256737
	0.398043	0.034591	3.74403		0.398043	0.034591		1.32606	3.05952		0.369782	0.272511		9.01662	0.369782	0.272511
	0.362552	0.0474071	3.79168		0.362552	0.0474071		1.31883	3.04145		0.287627	0.271196		8.9992	0.287627	0.271196
	0.40593	0.0339337	3.75159		0.40593	0.0339337		1.30273	3.06051		0.353351	0.254765		8.99986	0.353351	0.254765
	0.391799	0.036234	3.78346		0.391799	0.036234		1.3185	3.04605		0.345464	0.289928		8.967	0.345464	0.289928
	0.386541	0.0434637	3.78675		0.386541	0.0434637		1.30569	3.07694		0.33922	0.236034		8.98277	0.33922	0.236034
	0.407902	0.06811	3.78971		0.407902	0.06811		1.31423	3.05492		0.343492	0.303401		8.97916	0.343492	0.303401
	0.36551	0.0194745	3.76999		0.36551	0.0194745		1.33165	3.05689		0.315231	0.302086		8.99822	0.315231	0.302086
	0.362552	0.025061	3.76638		0.362552	0.025061		1.33395	3.05131		0.2942	0.289928		9.04093	0.2942	0.289928
	0.391471	0.0221035	3.77098		0.391471	0.0221035		1.34019	3.06051		0.302415	0.265281		8.99789	0.302415	0.265281
	0.408559	0.0359054	3.80482		0.408559	0.0359054		1.32047	3.05492		0.328376	0.241621		8.9923	0.328376	0.241621
	0.389828	0.052665	3.75553		0.389828	0.052665		1.32179	3.06379		0.341192	0.270868		9.04028	0.341192	0.270868
	0.397057	0.0579229	3.76342		0.397057	0.0579229		1.30602	3.02502		0.313259	0.284341		9.00709	0.313259	0.284341
	0.419732	0.0421492	3.75192		0.419732	0.0421492		1.30273	3.07694		0.348422	0.236363		9.0245	0.348422	0.236363
	0.432877	0.0359054	3.7207		0.432877	0.0359054		1.33132	3.04999		0.35828	0.252794		8.98376	0.35828	0.252794
	0.367153	0.0293331	3.7621		0.367153	0.0293331		1.33198	3.07957		0.34645	0.247864		8.95254	0.34645	0.247864
	0.400015	0.0184886	3.7621		0.400015	0.0184886		1.32409	3.0822		0.334291	0.250822		9.02155	0.334291	0.250822
	0.34415	0.0851982	3.7667		0.34415	0.0851982		1.30832	3.05328		0.381283	0.313917		8.96568	0.381283	0.313917
	0.373725	0.0221035	3.78051		0.373725	0.0221035		1.33066	3.06346		0.301758	0.240635		8.95484	0.301758	0.240635
	0.3964	0.0437923	3.75849		0.3964	0.0437923		1.31949	3.03652		0.297157	0.271525		9.02188	0.297157	0.271525
	0.374383	0.059566	3.76145		0.374383	0.059566		1.33461	3.04079		0.312274	0.281712		8.98113	0.312274	0.281712
	0.376026	0.00863009	3.75487		0.376026	0.00863009		1.33395	3.09698		0.404944	0.287627		8.98211	0.404944	0.287627
	0.402315	0.0336051	3.74567		0.402315	0.0336051		1.28728	3.11604		0.343164	0.23472		9.00676	0.343164	0.23472
	0.342835	0.0214462	3.74666		0.342835	0.0214462		1.32245	3.03553		0.342178	0.256737		8.97784	0.342178	0.256737
	0.399029	0.045764	3.75783		0.399029	0.045764		1.31423	3.1075		0.282041	0.295843		9.02056	0.282041	0.295843
	0.419075	0.038863	3.72234		0.419075	0.038863		1.34578	3.02995		0.302086	0.283684		9.01267	0.302086	0.283684
	0.354994	0.034591	3.74962		0.354994	0.034591		1.30832	3.02502		0.326404	0.303401		9.02155	0.326404	0.303401
	0.385884	0.00731562	3.78872		0.385884	0.00731562		1.30306	3.02995		0.333634	0.276126		8.99296	0.333634	0.276126
	0.416774	0.0529936	3.746		0.416774	0.0529936		1.31095	3.04309		0.336263	0.284012		8.98507	0.336263	0.284012
	0.37504	0.0483929	3.7345		0.37504	0.0483929		1.33822	3.02863		0.309645	0.247864		9.0153	0.309645	0.247864
	0.385556	0.0598946	3.77426		0.385556	0.0598946		1.31883	3.02173		0.292556	0.218617		9.00347	0.292556	0.218617
	0.381612	0.0575943	3.73483		0.381612	0.0575943		1.32935	3.03356		0.288613	0.273497		8.99263	0.288613	0.273497
	0.352365	0.0536508	3.7368		0.352365	0.0536508		1.31522	3.04703		0.318846	0.216317		8.96667	0.318846	0.216317
	0.352365	0.0336051	3.72366		0.352365	0.0336051		1.32212	3.0283		0.345135	0.271525		9.04422	0.345135	0.271525
	0.383584	0.0385344	3.77492		0.383584	0.0385344		1.32902	3.05328		0.315231	0.222889		8.96897	0.315231	0.222889
	0.395743	0.0694245	3.74962		0.395743	0.0694245		1.307	3.05985		0.305044	0.279083		9.0314	0.305044	0.279083
	0.387199	0.0142166	3.75685		0.387199	0.0142166		1.31357	3.02699		0.340863	0.275797		8.95221	0.340863	0.275797
	0.381612	0.0720535	3.7345		0.381612	0.0720535		1.31522	3.07497		0.312602	0.242278		8.99164	0.312602	0.242278
	0.388842	0.0585801	3.73614		0.388842	0.0585801		1.2978	3.03257		0.297814	0.238334		9.00084	0.297814	0.238334
	0.388842	0.0359054	3.72694		0.388842	0.0359054		1.3093	3.06609		0.338892	0.202186		8.95648	0.338892	0.202186
	0.3941	0.0506933	3.76605		0.3941	0.0506933		1.29189	3.06609		0.337906	0.276783		9.05046	0.337906	0.276783
	0.387527	0.038863	3.73746		0.387527	0.038863		1.30766	3.08712		0.330348	0.235705		8.99756	0.330348	0.235705
	0.383255	0.0161883	3.75619		0.383255	0.0161883		1.34085	3.02962		0.30833	0.27514		9.0268	0.30833	0.27514
	0.374054	0.050036	3.72103		0.374054	0.050036		1.3208	3.06248		0.386213	0.235048		8.95517	0.386213	0.235048
	0.373068	0.0398489	3.71248		0.373068	0.0398489		1.31883	3.07168		0.313917	0.291571		8.9854	0.313917	0.291571
	0.359266	0.0474071	3.73779		0.359266	0.0474071		1.30799	3.0868		0.317203	0.263967		9.00183	0.317203	0.263967
	0.385884	0.0635094	3.71741		0.385884	0.0635094		1.33756	2.99413		0.310631	0.261666		9.03699	0.310631	0.261666
	0.390156	0.0263755	3.7092		0.390156	0.0263755		1.29484	3.04243		0.363867	0.291899		9.00873	0.363867	0.291899
	0.366824	0.0378771	3.74042		0.366824	0.0378771		1.30634	3.03126		0.293542	0.287299		9.05276	0.293542	0.287299
	0.399686	0.0437923	3.70197		0.399686	0.0437923		1.35564	3.06445		0.337577	0.246879		8.99559	0.337577	0.246879
	0.381941	0.0158597	3.70887		0.381941	0.0158597		1.33132	3.07792		0.32016	0.277769		8.95484	0.32016	0.277769
	0.3941	0.0562798	3.72858		0.3941	0.0562798		1.33066	3.03027		0.35598	0.30833		9.04061	0.35598	0.30833
	0.391142	0.0490502	3.71314		0.391142	0.0490502		1.36484	3.06116		0.319175	0.2965		9.03568	0.319175	0.2965
	0.417432	0.0529936	3.7023		0.417432	0.0529936		1.31883	3.0444		0.380626	0.287956		9.02188	0.380626	0.287956
	0.421704	0.0411633	3.70788		0.421704	0.0411633		1.3162	3.02272		0.371425	0.301429		8.95122	0.371425	0.301429
	0.379969	0.0759969	3.70427		0.379969	0.0759969		1.29451	3.01746		0.343492	0.261338		8.9877	0.343492	0.261338
	0.38687	0.0414919	3.72168		0.38687	0.0414919		1.31686	3.03356		0.329033	0.287956		9.02188	0.329033	0.287956
	0.364524	0.0503646	3.7		0.364524	0.0503646		1.32212	3.02206		0.309973	0.264953		9.03239	0.309973	0.264953
	0.376683	0.0792831	3.66713		0.376683	0.0792831		1.33559	3.03553		0.404287	0.313588		8.96404	0.404287	0.313588
	0.393442	0.0651525	3.72267		0.393442	0.0651525		1.32803	3.0868		0.328047	0.240963		9.03995	0.328047	0.240963
	0.393114	0.0648239	3.67732		0.393114	0.0648239		1.32146	3.07135		0.33922	0.27514		9.01267	0.33922	0.27514
	0.391142	0.0421492	3.67173		0.391142	0.0421492		1.2955	3.0306		0.34645	0.284012		8.99526	0.34645	0.284012
	0.365838	0.0529936	3.69737		0.365838	0.0529936		1.32179	3.01286		0.319503	0.27021		8.99756	0.319503	0.27021
	0.393771	0.0293331	3.68455		0.393771	0.0293331		1.31883	3.02403		0.322132	0.307344		9.03929	0.322132	0.307344
	0.372082	0.0487216	3.70657		0.372082	0.0487216		1.30404	3.06576		0.343164	0.266267		9.03732	0.343164	0.266267
	0.404287	0.0848696	3.69605		0.404287	0.0848696		1.3655	3.03192		0.325418	0.318846		9.01235	0.325418	0.318846
	0.371096	0.0299903	3.68291		0.371096	0.0299903		1.33592	3.03356		0.327719	0.271196		9.03042	0.327719	0.271196
	0.377997	0.0598946	3.67831		0.377997	0.0598946		1.34052	3.05131		0.308659	0.229133		9.01005	0.308659	0.229133
	0.388842	0.0523364	3.66056		0.388842	0.0523364		1.3208	3.03159		0.305044	0.252794		9.0176	0.305044	0.252794
	0.354008	0.0612091	3.69901		0.354008	0.0612091		1.29813	3.04572		0.366167	0.275468		9.01202	0.366167	0.275468
	0.365181	0.043135	3.7		0.365181	0.043135		1.35925	3.02469		0.373397	0.234062		9.00709	0.373397	0.234062
	0.369453	0.0966999	3.70427		0.369453	0.0966999		1.32245	3.00661		0.316217	0.283027		8.99066	0.316217	0.283027
	0.386213	0.0267041	3.70788		0.386213	0.0267041		1.31062	2.98788		0.287299	0.276126		9.00512	0.287299	0.276126
	0.368139	0.0326192	3.6346		0.368139	0.0326192		1.32343	3.03192		0.337249	0.25378		9.00216	0.337249	0.25378
	0.346779	0.0832265	3.69211		0.346779	0.0832265		1.30667	3.02272		0.336263	0.28467		9.03305	0.336263	0.28467
	0.372739	0.0428064	3.67929		0.372739	0.0428064		1.34381	3.02534		0.336591	0.265938		9.02089	0.336591	0.265938
	0.351708	0.0736966	3.67305		0.351708	0.0736966		1.33263	3.03192		0.322132	0.241621		9.05145	0.322132	0.241621
	0.394757	0.0483929	3.68159		0.394757	0.0483929		1.33198	3.04868		0.349736	0.264953		9.05145	0.349736	0.264953
	0.414803	0.0733679	3.69769		0.414803	0.0733679		1.31423	3.03126		0.390485	0.278097		9.04981	0.390485	0.278097
	0.358609	0.0332765	3.65695		0.358609	0.0332765		1.33263	3.08745		0.388513	0.263638		8.96305	0.388513	0.263638
	0.35368	0.0572656	3.63723		0.35368	0.0572656		1.33395	3.0191		0.348422	0.251808		8.98869	0.348422	0.251808
	0.392785	0.0411633	3.69901		0.392785	0.0411633		1.35597	3.03093		0.28927	0.291242		9.00742	0.28927	0.291242
	0.386213	0.02769	3.67633		0.386213	0.02769		1.39047	3.02699		0.321475	0.267253		9.03338	0.321475	0.267253
	0.367482	0.0336051	3.64117		0.367482	0.0336051		1.33198	3.02797		0.337577	0.247864		9.00446	0.337577	0.247864
	0.355323	0.0648239	3.6622		0.355323	0.0648239		1.32935	3.04506		0.320489	0.27514		8.967	0.320489	0.27514
	0.358609	0.038863	3.69868		0.358609	0.038863		1.34446	2.99708		0.266596	0.236363		8.98409	0.266596	0.236363
	0.378655	0.0349196	3.66385		0.378655	0.0349196		1.30404	3.08647		0.37964	0.209416		9.01662	0.37964	0.209416
	0.356308	0.0303189	3.67009		0.356308	0.0303189		1.34939	3.08351		0.336591	0.281712		9.06492	0.336591	0.281712
	0.378326	0.0405061	3.63789		0.378326	0.0405061		1.32343	3.02502		0.367482	0.27744		8.97718	0.367482	0.27744
	0.357623	0.036234	3.67995		0.357623	0.036234		1.30142	3.01121		0.312602	0.292556		9.01727	0.312602	0.292556
	0.365838	0.006987	3.67272		0.365838	0.006987		1.33132	3.02863		0.293871	0.245235		9.01727	0.293871	0.245235
	0.380626	0.0562798	3.67929		0.380626	0.0562798		1.31357	3.05985		0.31786	0.249836		9.04455	0.31786	0.249836
	0.367482	0.0605518	3.66911		0.367482	0.0605518		1.29944	3.0306		0.345464	0.295843		8.99	0.345464	0.295843
	0.378655	0.0322906	3.67141		0.378655	0.0322906		1.36484	3.05656		0.388842	0.293214		8.93118	0.388842	0.293214
	0.399029	0.0237465	3.63197		0.399029	0.0237465		1.32508	3.06544		0.313588	0.239978		9.01103	0.313588	0.239978
	0.360252	0.0263755	3.64282		0.360252	0.0263755		1.32245	3.07135		0.31786	0.235705		9.03765	0.31786	0.235705
	0.37504	0.0234179	3.66648		0.37504	0.0234179		1.31095	3.05558		0.345793	0.273168		8.99559	0.345793	0.273168
	0.3987	0.0513505	3.67239		0.3987	0.0513505		1.32705	3.03849		0.329033	0.273825		8.99197	0.329033	0.273825
	0.411188	0.06811	3.6415		0.411188	0.06811		1.34874	3.0444		0.331005	0.2965		8.99296	0.331005	0.2965
	0.401329	0.0805975	3.653		0.401329	0.0805975		1.3277	3.02403		0.336591	0.237677		8.99164	0.336591	0.237677
	0.377669	0.0306475	3.67601		0.377669	0.0306475		1.31062	3.02764		0.305701	0.231762		8.94531	0.305701	0.231762
	0.372082	0.0391916	3.62343		0.372082	0.0391916		1.28827	3.0822		0.283684	0.284998		8.9463	0.283684	0.284998
	0.404944	0.0444495	3.63854		0.404944	0.0444495		1.33296	3.10158		0.308002	0.248193		8.96437	0.308002	0.248193
	0.359923	0.0549653	3.6231		0.359923	0.0549653		1.29024	3.06084		0.342835	0.283684		8.92001	0.342835	0.283684
	0.390156	0.0135594	3.6484		0.390156	0.0135594		1.31292	3.05985		0.303401	0.25838		8.98803	0.303401	0.25838
	0.372411	0.01816	3.66615		0.372411	0.01816		1.35334	3.0444		0.310959	0.266267		9.02648	0.310959	0.266267
	0.368139	0.034591	3.64775		0.368139	0.034591		1.30339	3.02995		0.377997	0.254108		9.00807	0.377997	0.254108
	0.3964	0.0234179	3.64577		0.3964	0.0234179		1.30076	3.06182		0.319832	0.2942		9.03206	0.319832	0.2942
	0.392128	0.0257183	3.63822		0.392128	0.0257183		1.32475	3.026		0.332648	0.27974		9.04586	0.332648	0.27974
	0.393771	0.0447781	3.6507		0.393771	0.0447781		1.36582	3.0375		0.296171	0.247536		8.96503	0.296171	0.247536
	0.374711	0.0602232	3.61587		0.374711	0.0602232		1.31686	3.0145		0.312931	0.259366		8.94531	0.312931	0.259366
	0.385556	0.063838	3.61653		0.385556	0.063838		1.30043	3.01713		0.346779	0.233077		8.99986	0.346779	0.233077
	0.3964	0.0598946	3.60963		0.3964	0.0598946		1.31325	3.0122		0.339549	0.265281		8.9946	0.339549	0.265281
	0.362552	0.0671242	3.60207		0.362552	0.0671242		1.32508	3.04933		0.366824	0.264295		8.9831	0.366824	0.264295
	0.358609	0.0352482	3.6484		0.358609	0.0352482		1.31817	3.04999		0.332977	0.221904		9.02023	0.332977	0.221904
	0.371425	0.0414919	3.66253		0.371425	0.0414919		1.34249	3.03093		0.343821	0.266924		9.00873	0.343821	0.266924
	0.349736	0.0359054	3.62737		0.349736	0.0359054		1.30437	3.01549		0.320489	0.311945		8.98737	0.320489	0.311945
	0.368139	0.031962	3.64249		0.368139	0.031962		1.31785	3.02764		0.328047	0.287627		8.98573	0.328047	0.287627
	0.372082	0.0401775	3.62474		0.372082	0.0401775		1.33559	3.01746		0.338892	0.23932		9.04619	0.338892	0.23932
	0.397386	0.0398489	3.63526		0.397386	0.0398489		1.32212	3.02995		0.393442	0.276126		9.05966	0.393442	0.276126
	0.38687	0.0201317	3.62573		0.38687	0.0201317		1.34348	3.05788		0.34645	0.239978		8.99427	0.34645	0.239978
	0.376683	0.0329479	3.61981		0.376683	0.0329479		1.31555	3.03816		0.347107	0.266596		8.99657	0.347107	0.266596
	0.363538	0.0418206	3.59188		0.363538	0.0418206		1.34512	3.06346		0.361566	0.303072		9.00084	0.361566	0.303072
	0.362224	0.0822406	3.6599		0.362224	0.0822406		1.34151	3.03159		0.342507	0.248193		8.98967	0.342507	0.248193
	0.392785	0.0198031	3.63986		0.392785	0.0198031		1.31456	3.03225		0.338563	0.254437		9.01432	0.338563	0.254437
	0.404287	0.0493788	3.65235		0.404287	0.0493788		1.33888	3.02272		0.336263	0.301101		8.97324	0.336263	0.301101
	0.357623	0.0533222	3.6254		0.357623	0.0533222		1.34414	3.04342		0.349079	0.281712		9.01366	0.349079	0.281712
	0.384898	0.0280186	3.60765		0.384898	0.0280186		1.33822	3.0398		0.35368	0.217631		8.98573	0.35368	0.217631
	0.391799	0.0477357	3.61948		0.391799	0.0477357		1.31817	3.03915		0.356308	0.276783		8.99657	0.356308	0.276783
	0.377997	0.0293331	3.57775		0.377997	0.0293331		1.34874	3.04473		0.348093	0.307673		8.99789	0.348093	0.307673
	0.361238	0.0467498	3.63099		0.361238	0.0467498		1.32245	3.0914		0.335934	0.286313		9.02812	0.335934	0.286313
	0.367482	0.0171742	3.59944		0.367482	0.0171742		1.31062	3.03947		0.311945	0.249179		9.01892	0.311945	0.249179
	0.373725	0.0352482	3.60667		0.373725	0.0352482		1.33066	3.03389		0.311616	0.289928		8.99624	0.311616	0.289928
	0.395743	0.0273613	3.58859		0.395743	0.0273613		1.30733	3.03783		0.367482	0.282041		8.98737	0.367482	0.282041
	0.372411	0.0477357	3.57972		0.372411	0.0477357		1.32409	3.04868		0.33462	0.259037		9.00249	0.33462	0.259037
	0.352365	0.0598946	3.60963		0.352365	0.0598946		1.30766	3.06051		0.361895	0.277769		8.99296	0.361895	0.277769
	0.37011	0.0842124	3.62113		0.37011	0.0842124		1.32508	3.05426		0.354994	0.272511		8.9923	0.354994	0.272511
	0.382927	0.0773114	3.62638		0.382927	0.0773114		1.33658	3.05393		0.336263	0.266267		8.95944	0.336263	0.266267
	0.403958	0.0763255	3.60272		0.403958	0.0763255		1.31752	3.0283		0.2942	0.200543		8.92001	0.2942	0.200543
	0.361566	0.0644952	3.59549		0.361566	0.0644952		1.33888	3.00431		0.326404	0.276126		8.99066	0.326404	0.276126
	0.368467	0.0631808	3.60042		0.368467	0.0631808		1.34676	3.02995		0.294857	0.227161		8.9831	0.294857	0.227161
	0.361566	0.031962	3.57249		0.361566	0.031962		1.37075	3.04506		0.354665	0.273497		9.00774	0.354665	0.273497
	0.363538	0.0487216	3.63953		0.363538	0.0487216		1.36418	3.04375		0.382927	0.287956		8.93611	0.382927	0.287956
	0.354008	0.0372199	3.58794		0.354008	0.0372199		1.34085	3.0467		0.324104	0.259366		9.00084	0.324104	0.259366
	0.369782	0.0556225	3.60798		0.369782	0.0556225		1.3277	3.05032		0.372082	0.27021		8.9923	0.372082	0.27021
	0.383255	0.0247324	3.60963		0.383255	0.0247324		1.35301	3.10421		0.342178	0.310302		8.92494	0.342178	0.310302
	0.340863	0.0487216	3.6047		0.340863	0.0487216		1.37601	3.01154		0.344478	0.310302		8.98967	0.344478	0.310302
	0.352365	0.0667956	3.57249		0.352365	0.0667956		1.2863	3.02239		0.34645	0.269882		8.92264	0.34645	0.269882
	0.388513	0.0694245	3.59155		0.388513	0.0694245		1.33198	3.02764		0.37964	0.21073		8.99033	0.37964	0.21073
	0.369125	0.0631808	3.58334		0.369125	0.0631808		1.3816	3.04342		0.375368	0.270868		8.97521	0.375368	0.270868
	0.382269	0.0763255	3.55902		0.382269	0.0763255		1.33263	3.03192		0.323118	0.303401		8.95648	0.323118	0.303401
	0.376683	0.0155311	3.57611		0.376683	0.0155311		1.33165	3.05755		0.312602	0.260352		8.94367	0.312602	0.260352
	0.36551	0.0487216	3.57118		0.36551	0.0487216		1.32475	3.02173		0.31556	0.290913		8.96831	0.31556	0.290913
	0.3987	0.0477357	3.58859		0.3987	0.0477357		1.33723	3.05821		0.322461	0.228476		8.96371	0.322461	0.228476
	0.349736	0.0464212	3.54555		0.349736	0.0464212		1.34118	3.08417		0.363209	0.305044		8.98934	0.363209	0.305044
	0.338892	0.0411633	3.54292		0.338892	0.0411633		1.33099	3.07069		0.327719	0.274482		8.99592	0.327719	0.274482
	0.340535	0.0372199	3.5508		0.340535	0.0372199		1.35498	3.03849		0.360909	0.231762		8.95845	0.360909	0.231762
	0.353351	0.052665	3.60568		0.353351	0.052665		1.33461	3.01089		0.337577	0.277111		8.97981	0.337577	0.277111
	0.378326	0.0342623	3.58399		0.378326	0.0342623		1.3116	3.01154		0.279083	0.28927		9.01235	0.279083	0.28927
	0.385884	0.0506933	3.56756		0.385884	0.0506933		1.31522	3.0329		0.318846	0.234391		8.97423	0.318846	0.234391
	0.365181	0.0352482	3.58235		0.365181	0.0352482		1.33033	3.05328		0.32016	0.238006		8.94301	0.32016	0.238006
	0.324761	0.0273613	3.53372		0.324761	0.0273613		1.31686	3.06346		0.393442	0.269225		8.99624	0.393442	0.269225
	0.363867	0.00468667	3.54456		0.363867	0.00468667		1.32968	3.0329		0.318189	0.292885		8.9739	0.318189	0.292885
	0.310959	0.0391916	3.58597		0.310959	0.0391916		1.32606	3.07957		0.331333	0.269553		9.0038	0.331333	0.269553
	0.364195	0.0792831	3.54785		0.364195	0.0792831		1.32343	3.0444		0.364853	0.274154		8.97028	0.364853	0.274154
	0.373068	0.0615377	3.58268		0.373068	0.0615377		1.31883	3.03126		0.323775	0.255423		8.98113	0.323775	0.255423
	0.366824	0.0414919	3.56921		0.366824	0.0414919		1.35531	3.06971		0.290256	0.268896		9.03338	0.290256	0.268896
	0.40363	0.0470785	3.57841		0.40363	0.0470785		1.37273	3.03455		0.302744	0.274811		8.91705	0.302744	0.274811
	0.380298	0.0434637	3.54259		0.380298	0.0434637		1.32508	3.04408		0.271525	0.279083		8.94498	0.271525	0.279083
	0.334948	0.006987	3.55343		0.334948	0.006987		1.35301	3.06281		0.354337	0.291571		8.96043	0.354337	0.291571
	0.338563	0.0549653	3.56921		0.338563	0.0549653		1.33329	3.02732		0.336263	0.261338		8.97488	0.336263	0.261338
	0.369782	0.0424778	3.53404		0.369782	0.0424778		1.35367	3.00661		0.331005	0.286313		8.99394	0.331005	0.286313
	0.33922	0.0296617	3.5416		0.33922	0.0296617		1.37667	3.07069		0.340206	0.312602		9.00709	0.340206	0.312602
	0.350065	0.0290044	3.5278		0.350065	0.0290044		1.35925	3.07891		0.333962	0.304715		9.04389	0.333962	0.304715
	0.354337	0.0257183	3.53602		0.354337	0.0257183		1.35169	3.08121		0.33462	0.278755		8.96075	0.33462	0.278755
	0.349408	0.0401775	3.54456		0.349408	0.0401775		1.37305	3.06248		0.341521	0.26068		8.95944	0.341521	0.26068
	0.335277	0.0493788	3.53043		0.335277	0.0493788		1.33198	3.03553		0.326404	0.293542		8.95155	0.326404	0.293542
	0.358609	0.0316334	3.56		0.358609	0.0316334		1.33428	3.02074		0.383912	0.26791		8.97751	0.383912	0.26791
	0.36551	0.0418206	3.54193		0.36551	0.0418206		1.34282	3.02797		0.361238	0.243264		8.99362	0.361238	0.243264
	0.354008	0.0444495	3.53667		0.354008	0.0444495		1.35301	3.05163		0.258052	0.279083		8.95977	0.258052	0.279083
	0.355651	0.0585801	3.52616		0.355651	0.0585801		1.36221	3.00727		0.335277	0.291242		8.97258	0.335277	0.291242
	0.35828	0.0539794	3.5324		0.35828	0.0539794		1.35301	3.05163		0.313917	0.254437		8.95484	0.313917	0.254437
	0.356966	0.031962	3.52616		0.356966	0.031962		1.30733	3.03685		0.314903	0.268896		8.96766	0.314903	0.268896
	0.380298	0.0506933	3.56789		0.380298	0.0506933		1.32245	3.08187		0.298472	0.268567		8.96996	0.298472	0.268567
	0.361895	0.02769	3.56691		0.361895	0.02769		1.33099	3.04901		0.410859	0.219932		8.98671	0.410859	0.219932
	0.36781	0.0556225	3.55902		0.36781	0.0556225		1.33033	3.05853		0.356308	0.257723		9.01497	0.356308	0.257723
	0.374711	0.0566084	3.55113		0.374711	0.0566084		1.32705	3.0467		0.374383	0.272182		8.99362	0.374383	0.272182
	0.361895	0.0339337	3.56953		0.361895	0.0339337		1.33756	3.02074		0.34645	0.261338		8.97916	0.34645	0.261338
	0.345135	0.0313048	3.54127		0.345135	0.0313048		1.32212	3.0237		0.284012	0.268567		8.96634	0.284012	0.268567
	0.334291	0.0766541	3.537		0.334291	0.0766541		1.31555	3.0306		0.304387	0.271196		8.94564	0.304387	0.271196
	0.344478	0.0582515	3.51433		0.344478	0.0582515		1.29977	3.05426		0.287299	0.28697		8.98113	0.287299	0.28697
	0.369453	0.0460926	3.53043		0.369453	0.0460926		1.33625	3.08482		0.306358	0.235377		8.97784	0.306358	0.235377
	0.372082	0.0365627	3.52353		0.372082	0.0365627		1.3885	3.06018		0.287956	0.227161		8.97423	0.287956	0.227161
	0.342507	0.0184886	3.51038		0.342507	0.0184886		1.32705	3.03619		0.302744	0.242935		9.00643	0.302744	0.242935
	0.3964	0.0480643	3.5163		0.3964	0.0480643		1.35334	3.04572		0.362552	0.24655		9.01662	0.362552	0.24655
	0.401986	0.0293331	3.52681		0.401986	0.0293331		1.33099	3.01351		0.366167	0.274811		8.94465	0.366167	0.274811
	0.353351	0.0253896	3.52517		0.353351	0.0253896		1.30766	3.05131		0.351708	0.264295		8.97587	0.351708	0.264295
	0.381612	0.0579229	3.52353		0.381612	0.0579229		1.33592	3.06642		0.366496	0.22979		8.99099	0.366496	0.22979
	0.341521	0.01816	3.51531		0.341521	0.01816		1.33461	3.01319		0.390156	0.27744		8.93151	0.390156	0.27744
	0.369782	0.025061	3.51268		0.369782	0.025061		1.34381	3.05393		0.343164	0.244907		9.00939	0.343164	0.244907
	0.367153	0.0556225	3.51334		0.367153	0.0556225		1.33033	3.05098		0.335934	0.268567		8.99756	0.335934	0.268567
	0.352036	0.0602232	3.51137		0.352036	0.0602232		1.29616	3.02304		0.33692	0.261666		8.94564	0.33692	0.261666
	0.337249	0.0539794	3.48968		0.337249	0.0539794		1.34085	3.04736		0.332648	0.261009		8.97784	0.332648	0.261009
	0.368467	0.0441209	3.53766		0.368467	0.0441209		1.31785	3.03422		0.347436	0.253122		8.97456	0.347436	0.253122
	0.351708	0.050036	3.50348		0.351708	0.050036		1.34184	3.04638		0.294528	0.271854		8.94071	0.294528	0.271854
	0.335277	0.0516791	3.50841		0.335277	0.0516791		1.31555	3.03487		0.301429	0.304715		8.98146	0.301429	0.304715
	0.368467	0.0589087	3.5186		0.368467	0.0589087		1.33	3.02009		0.345464	0.27021		8.97883	0.345464	0.27021
	0.33692	0.0743538	3.5048		0.33692	0.0743538		1.32212	3.03783		0.35368	0.24655		8.99066	0.35368	0.24655
	0.374711	0.0359054	3.52287		0.374711	0.0359054		1.33855	3.04079		0.32969	0.230119		8.97291	0.32969	0.230119
	0.373397	0.0336051	3.53043		0.373397	0.0336051		1.35301	3.0352		0.290913	0.272511		8.95451	0.290913	0.272511
	0.363867	0.0434637	3.48968		0.363867	0.0434637		1.36845	3.04276		0.32509	0.228805		9.00052	0.32509	0.228805
	0.350393	0.0260469	3.50217		0.350393	0.0260469		1.32803	3.04802		0.30603	0.251808		8.94235	0.30603	0.251808
	0.363867	0.0405061	3.47621		0.363867	0.0405061		1.36714	3.05262		0.31556	0.267581		8.99329	0.31556	0.267581
	0.348422	0.0368913	3.48409		0.348422	0.0368913		1.35235	3.0352		0.315231	0.25378		8.91968	0.315231	0.25378
	0.351708	0.0572656	3.47029		0.351708	0.0572656		1.35794	3.02074		0.379312	0.305701		9.0245	0.379312	0.305701
	0.320489	0.0115877	3.5163		0.320489	0.0115877		1.38916	3.03717		0.394428	0.281712		8.9555	0.394428	0.281712
	0.346121	0.0667956	3.47522		0.346121	0.0667956		1.34775	3.06314		0.353351	0.265938		9.00742	0.353351	0.265938
	0.365838	0.0444495	3.52747		0.365838	0.0444495		1.31785	3.05853		0.335277	0.239978		9.02122	0.335277	0.239978
	0.366824	0.0782972	3.48442		0.366824	0.0782972		1.35498	3.07661		0.334948	0.241621		8.96141	0.334948	0.241621
	0.390156	0.031962	3.48902		0.390156	0.031962		1.36254	3.06544		0.37011	0.228147		8.94925	0.37011	0.228147
	0.37504	0.0589087	3.47424		0.37504	0.0589087		1.35695	3.02567		0.315231	0.254437		8.97258	0.315231	0.254437
	0.382598	0.0543081	3.47949		0.382598	0.0543081		1.37141	3.03783		0.319175	0.27514		8.95813	0.319175	0.27514
	0.364195	0.0194745	3.5232		0.364195	0.0194745		1.31193	3.02502		0.286313	0.248522		8.97357	0.286313	0.248522
	0.348422	0.00928733	3.51367		0.348422	0.00928733		1.32343	3.01877		0.368467	0.298143		8.98836	0.368467	0.298143
	0.361895	0.0359054	3.50348		0.361895	0.0359054		1.32343	3.05985		0.350393	0.316874		8.94958	0.350393	0.316874
	0.384898	0.0661383	3.47358		0.384898	0.0661383		1.35695	3.06051		0.323447	0.318517		8.92954	0.323447	0.318517
	0.372739	0.0497074	3.47884		0.372739	0.0497074		1.33099	3.01614		0.315888	0.287956		8.92034	0.315888	0.287956
	0.362881	0.0736966	3.51466		0.362881	0.0736966		1.31752	3.03356		0.357623	0.254108		8.9601	0.357623	0.254108
	0.334948	0.0283472	3.46865		0.334948	0.0283472		1.34414	3.03685		0.403958	0.263309		8.97028	0.403958	0.263309
	0.354665	0.0204604	3.46306		0.354665	0.0204604		1.32475	3.03356		0.374383	0.257723		8.97324	0.374383	0.257723
	0.317203	0.0855268	3.47851		0.317203	0.0855268		1.34414	3.05163		0.348422	0.280726		9.03338	0.348422	0.280726
	0.363867	0.0562798	3.45616		0.363867	0.0562798		1.33559	3.02403		0.368139	0.274811		8.9739	0.368139	0.274811
	0.365838	0.0155311	3.48672		0.365838	0.0155311		1.33625	3.05393		0.340863	0.23472		9.01563	0.340863	0.23472
	0.364195	0.0608804	3.49888		0.364195	0.0608804		1.33986	3.02042		0.314903	0.299457		8.96075	0.314903	0.299457
	0.360909	0.0382058	3.47358		0.360909	0.0382058		1.32343	3.07431		0.340206	0.266924		8.94761	0.340206	0.266924
	0.339878	0.052665	3.47752		0.339878	0.052665		1.33921	2.98492		0.337906	0.213688		9.00939	0.337906	0.213688
	0.326076	0.050036	3.46405		0.326076	0.050036		1.33855	3.0467		0.295843	0.261338		8.97751	0.295843	0.261338
	0.34415	0.0539794	3.48804		0.34415	0.0539794		1.3185	3.05229		0.30373	0.250165		8.95714	0.30373	0.250165
	0.345464	0.0546367	3.46635		0.345464	0.0546367		1.33789	3.01844		0.361238	0.247864		8.99526	0.361238	0.247864
	0.360252	0.0339337	3.45156		0.360252	0.0339337		1.33461	3.07069		0.358609	0.253451		8.94925	0.358609	0.253451
	0.362224	0.045764	3.48869		0.362224	0.045764		1.32212	3.06642		0.354008	0.253122		8.98146	0.354008	0.253122
	0.362552	0.0506933	3.4601		0.362552	0.0506933		1.35597	3.00563		0.294528	0.238334		8.97784	0.294528	0.238334
	0.376683	0.0286758	3.44105		0.376683	0.0286758		1.34446	3.04506		0.324761	0.255423		8.99657	0.324761	0.255423
	0.369453	0.0480643	3.45879		0.369453	0.0480643		1.35859	3.05426		0.35828	0.262324		8.98704	0.35828	0.262324
	0.366824	0.0848696	3.45156		0.366824	0.0848696		1.33066	3.05656		0.369453	0.278755		8.97291	0.369453	0.278755
	0.369782	0.0677814	3.45222		0.369782	0.0677814		1.32179	3.03783		0.32739	0.27021		8.94137	0.32739	0.27021
	0.367482	0.050036	3.42691		0.367482	0.050036		1.33592	3.04802		0.290585	0.269553		8.96996	0.290585	0.269553
	0.353351	0.0756683	3.46241		0.353351	0.0756683		1.31259	3.05098		0.334948	0.263638		8.98441	0.334948	0.263638
	0.377011	0.0487216	3.45156		0.377011	0.0487216		1.36977	3.00431		0.363867	0.285327		8.95615	0.363867	0.285327
	0.347436	0.0796117	3.44597		0.347436	0.0796117		1.37831	3.03487		0.282041	0.261009		8.96371	0.282041	0.261009
	0.349736	0.0556225	3.45748		0.349736	0.0556225		1.34545	3.0398		0.288613	0.228805		8.97916	0.288613	0.228805
	0.332319	0.0263755	3.43973		0.332319	0.0263755		1.35991	3.04966		0.328376	0.279412		8.97127	0.328376	0.279412
	0.368139	0.0372199	3.46241		0.368139	0.0372199		1.32508	3.06116		0.338892	0.281383		8.97094	0.338892	0.281383
	0.371096	0.0536508	3.45978		0.371096	0.0536508		1.33395	3.04933		0.321804	0.273825		9.00709	0.321804	0.273825
	0.36551	0.0533222	3.44433		0.36551	0.0533222		1.33132	3.07628		0.317203	0.295514		9.01629	0.317203	0.295514
	0.355651	0.0414919	3.46076		0.355651	0.0414919		1.29846	3.05492		0.341192	0.283684		8.93874	0.341192	0.283684
	0.324761	0.0378771	3.4371		0.324761	0.0378771		1.31982	3.04835		0.336263	0.248522		8.97456	0.336263	0.248522
	0.362552	0.0115877	3.43644		0.362552	0.0115877		1.36517	3.0214		0.331991	0.290585		8.96798	0.331991	0.290585
	0.381612	0.0414919	3.44499		0.381612	0.0414919		1.33526	3.0375		0.338892	0.263638		8.99559	0.338892	0.263638
	0.372739	0.0552939	3.44992		0.372739	0.0552939		1.33658	3.07299		0.325747	0.290256		8.99822	0.325747	0.290256
	0.369125	0.0697531	3.39602		0.369125	0.0697531		1.33559	3.06116		0.328376	0.222561		8.97718	0.328376	0.222561
	0.359266	0.0145452	3.43776		0.359266	0.0145452		1.32508	3.00924		0.294528	0.274482		8.97916	0.294528	0.274482
	0.343492	0.0349196	3.46668		0.343492	0.0349196		1.35827	3.05919		0.299129	0.243921		8.9854	0.299129	0.243921
	0.337577	0.0552939	3.44762		0.337577	0.0552939		1.30306	3.04901		0.276783	0.290913		8.97718	0.276783	0.290913
	0.354994	0.0355768	3.44729		0.354994	0.0355768		1.33395	3.07267		0.305701	0.262652		8.98047	0.305701	0.262652
	0.347107	0.0549653	3.42593		0.347107	0.0549653		1.33592	3.01844		0.292885	0.273497		8.95024	0.292885	0.273497
	0.316546	0.043135	3.42987		0.316546	0.043135		1.33723	3.02929		0.305701	0.214345		9.0061	0.305701	0.214345
	0.362224	0.0224321	3.43316		0.362224	0.0224321		1.32672	3.02929		0.322132	0.231433		8.96075	0.322132	0.231433
	0.375368	0.0589087	3.42856		0.375368	0.0589087		1.34874	3.01614		0.338563	0.244907		8.97357	0.338563	0.244907
	0.341849	0.0779686	3.41969		0.341849	0.0779686		1.34479	3.07135		0.305044	0.243264		8.93217	0.305044	0.243264
	0.35828	0.0490502	3.44663		0.35828	0.0490502		1.3116	2.98722		0.336591	0.25608		8.97193	0.336591	0.25608
	0.375697	0.0359054	3.45058		0.375697	0.0359054		1.34512	3.04145		0.298472	0.247207		8.91606	0.298472	0.247207
	0.367153	0.0398489	3.41541		0.367153	0.0398489		1.35498	3.04243		0.2988	0.250822		8.91935	0.2988	0.250822
	0.348422	0.0753397	3.4302		0.348422	0.0753397		1.34085	3.07497		0.304058	0.257723		8.95517	0.304058	0.257723
	0.379969	0.0145452	3.40851		0.379969	0.0145452		1.34118	3.05229		0.31556	0.277111		8.96601	0.31556	0.277111
	0.357294	0.0520077	3.3957		0.357294	0.0520077		1.35794	3.03257		0.350722	0.264295		8.95057	0.350722	0.264295
	0.376354	0.0365627	3.40654		0.376354	0.0365627		1.33099	3.02173		0.301758	0.313259		8.94137	0.301758	0.313259
	0.351379	0.0612091	3.42691		0.351379	0.0612091		1.33132	3.01154		0.331991	0.241621		8.91048	0.331991	0.241621
	0.35368	0.0378771	3.4072		0.35368	0.0378771		1.31982	3.07004		0.254108	0.266596		8.93939	0.254108	0.266596
	0.359595	0.0355768	3.40523		0.359595	0.0355768		1.31785	3.05098		0.340206	0.24425		8.96667	0.340206	0.24425
	0.324432	0.0451067	3.40753		0.324432	0.0451067		1.35169	3.02436		0.328047	0.243264		8.91804	0.328047	0.243264
	0.374711	0.0306475	3.41706		0.374711	0.0306475		1.34972	3.03225		0.342507	0.284998		8.95385	0.342507	0.284998
	0.37734	0.031962	3.38781		0.37734	0.031962		1.34216	3.00563		0.338234	0.261666		8.98934	0.338234	0.261666
	0.343492	0.0447781	3.44039		0.343492	0.0447781		1.36615	3.06379		0.331333	0.292228		8.9601	0.331333	0.292228
	0.351379	0.0378771	3.4003		0.351379	0.0378771		1.33461	3.05196		0.340535	0.288942		8.89536	0.340535	0.288942
	0.357623	0.0309762	3.41443		0.357623	0.0309762		1.34151	3.04703		0.330348	0.272511		9.00676	0.330348	0.272511
	0.34415	0.0411633	3.42166		0.34415	0.0411633		1.36484	3.00563		0.322461	0.255094		9.01399	0.322461	0.255094
	0.335934	0.0306475	3.41508		0.335934	0.0306475		1.33723	3.00464		0.35368	0.254108		8.98376	0.35368	0.254108
	0.357294	0.0395202	3.42659		0.357294	0.0395202		1.34446	3.02436		0.297486	0.241292		8.95714	0.297486	0.241292
	0.34875	0.0460926	3.41048		0.34875	0.0460926		1.33231	3.01351		0.323118	0.232748		8.93775	0.323118	0.232748
	0.352365	0.0263755	3.38058		0.352365	0.0263755		1.3816	2.99544		0.3941	0.31556		8.96963	0.3941	0.31556
	0.357294	0.0529936	3.41016		0.357294	0.0529936		1.33165	3.00333		0.333634	0.257723		8.95813	0.333634	0.257723
	0.347764	0.0556225	3.38847		0.347764	0.0556225		1.35071	3.02107		0.295514	0.202515		9.013	0.295514	0.202515
	0.364524	0.0414919	3.4003		0.364524	0.0414919		1.35728	3.02107		0.363867	0.243921		8.96798	0.363867	0.243921
	0.323447	0.0704104	3.38781		0.323447	0.0704104		1.33099	3.04539		0.354994	0.229462		8.93447	0.354994	0.229462
	0.342835	0.0280186	3.42166		0.342835	0.0280186		1.3139	3.07694		0.380955	0.272511		8.99263	0.380955	0.272511
	0.331005	0.0227607	3.37434		0.331005	0.0227607		1.34676	3.01121		0.306687	0.267253		8.97488	0.306687	0.267253
	0.340863	0.0398489	3.39537		0.340863	0.0398489		1.34151	3.0283		0.34645	0.208759		9.01267	0.34645	0.208759
	0.34875	0.063838	3.34542		0.34875	0.063838		1.35892	3.01812		0.324104	0.219932		8.94465	0.324104	0.219932
	0.361566	0.0309762	3.4072		0.361566	0.0309762		1.35629	3.01976		0.32016	0.237349		8.94235	0.32016	0.237349
	0.316217	0.0349196	3.39405		0.316217	0.0349196		1.34151	3.04375		0.292885	0.286641		8.96831	0.292885	0.286641
	0.307016	0.0211176	3.39307		0.307016	0.0211176		1.36977	3.00136		0.304387	0.290585		8.97324	0.304387	0.290585
	0.300772	0.0835551	3.38912		0.300772	0.0835551		1.33822	3.05722		0.330019	0.245235		8.99033	0.330019	0.245235
	0.309973	0.0497074	3.4026		0.309973	0.0497074		1.32672	3.01187		0.343492	0.240635		8.90292	0.343492	0.240635
	0.347107	0.0575943	3.37466		0.347107	0.0575943		1.34972	3.0191		0.326404	0.202186		8.93611	0.326404	0.202186
	0.364853	0.0395202	3.40095		0.364853	0.0395202		1.33822	3.0352		0.326404	0.23702		8.95681	0.326404	0.23702
	0.340863	0.059566	3.37368		0.340863	0.059566		1.36648	3.06379		0.358609	0.216646		8.92264	0.358609	0.216646
	0.334291	0.0441209	3.38321		0.334291	0.0441209		1.35728	3.01384		0.32739	0.239649		8.9463	0.32739	0.239649
	0.352365	0.059566	3.4141		0.352365	0.059566		1.33296	3.03455		0.34645	0.252136		8.95451	0.34645	0.252136
	0.314574	0.0378771	3.40194		0.314574	0.0378771		1.3632	3.00333		0.307016	0.290585		8.9762	0.307016	0.290585
	0.346779	0.0789545	3.39635		0.346779	0.0789545		1.38291	3.03225		0.307016	0.253122		8.93578	0.307016	0.253122
	0.341521	0.0539794	3.35363		0.341521	0.0539794		1.36845	3.01877		0.308002	0.231105		8.92658	0.308002	0.231105
	0.359595	0.0598946	3.37335		0.359595	0.0598946		1.34709	3.00136		0.341849	0.243921		8.97094	0.341849	0.243921
	0.365181	0.020789	3.37598		0.365181	0.020789		1.32508	3.02272		0.416774	0.264624		8.9555	0.416774	0.264624
	0.32509	0.0556225	3.39372		0.32509	0.0556225		1.34052	3.03192		0.364195	0.276783		8.97456	0.364195	0.276783
	0.333305	0.0214462	3.36251		0.333305	0.0214462		1.34184	3.07037		0.343821	0.251151		8.99493	0.343821	0.251151
	0.33922	0.0391916	3.35922		0.33922	0.0391916		1.35399	3.02239		0.352694	0.264295		8.98836	0.352694	0.264295
	0.290256	0.0329479	3.40687		0.290256	0.0329479		1.33296	3.02797		0.306687	0.276454		8.98934	0.306687	0.276454
	0.354337	0.0405061	3.37565		0.354337	0.0405061		1.32278	3.00234		0.352036	0.254437		8.97423	0.352036	0.254437
	0.388842	0.0349196	3.37138		0.388842	0.0349196		1.31817	3.06642		0.336263	0.271854		8.90916	0.336263	0.271854
	0.331991	0.0464212	3.37598		0.331991	0.0464212		1.34644	3.04046		0.303072	0.271196		8.9647	0.303072	0.271196
	0.35828	0.0411633	3.40424		0.35828	0.0411633		1.36911	3.02436		0.318189	0.271525		8.9624	0.318189	0.271525
	0.339878	0.0641666	3.35232		0.339878	0.0641666		1.34052	3.02436		0.378326	0.257723		8.90818	0.378326	0.257723
	0.361238	0.0165169	3.37466		0.361238	0.0165169		1.35564	3.00333		0.321146	0.277111		8.96043	0.321146	0.277111
	0.318517	0.0520077	3.36513		0.318517	0.0520077		1.33888	3.02567		0.324761	0.243264		8.97456	0.324761	0.243264
	0.337906	0.034591	3.34936		0.337906	0.034591		1.35301	3.04243		0.333305	0.224861		8.90522	0.333305	0.224861
	0.34645	0.0506933	3.36875		0.34645	0.0506933		1.34545	3.03422		0.314903	0.31556		8.96766	0.314903	0.31556
	0.349736	0.0273613	3.36053		0.349736	0.0273613		1.34019	3.03783		0.297157	0.228147		8.92592	0.297157	0.228147
	0.357623	0.0234179	3.37598		0.357623	0.0234179		1.33822	3.04276		0.291899	0.295185		8.95188	0.291899	0.295185
	0.334948	0.0395202	3.37039		0.334948	0.0395202		1.32968	3.03389		0.322461	0.263967		8.88222	0.322461	0.263967
	0.331991	0.0378771	3.36513		0.331991	0.0378771		1.34052	3.00234		0.408559	0.275797		8.93972	0.408559	0.275797
	0.347436	0.00928733	3.35791		0.347436	0.00928733		1.30339	3.00924		0.347436	0.242278		8.95352	0.347436	0.242278
	0.341849	0.0359054	3.33983		0.341849	0.0359054		1.31752	3.06215		0.308002	0.266924		8.93085	0.308002	0.266924
	0.374054	0.0506933	3.33589		0.374054	0.0506933		1.36385	3.06346		0.354008	0.281383		8.96207	0.354008	0.281383
	0.376354	0.0648239	3.33227		0.376354	0.0648239		1.34709	3.02962		0.34645	0.261338		8.93677	0.34645	0.261338
	0.353022	0.0470785	3.35692		0.353022	0.0470785		1.34512	3.06149		0.334948	0.299457		8.93545	0.334948	0.299457
	0.32969	0.0132308	3.34377		0.32969	0.0132308		1.34972	3.04605		0.352365	0.27514		8.93447	0.352365	0.27514
	0.331991	0.0520077	3.34706		0.331991	0.0520077		1.37995	3.01154		0.299129	0.242935		8.91606	0.299129	0.242935
	0.370439	0.059566	3.34213		0.370439	0.059566		1.38883	3.05722		0.331333	0.257066		8.97817	0.331333	0.257066
	0.369782	0.0293331	3.37105		0.369782	0.0293331		1.33625	2.99708		0.310302	0.241292		8.94597	0.310302	0.241292
	0.351708	0.0395202	3.33326		0.351708	0.0395202		1.37207	3.06774		0.310302	0.311288		8.91475	0.310302	0.311288
	0.343492	0.043135	3.3073		0.343492	0.043135		1.35432	3.08088		0.337906	0.305701		8.95188	0.337906	0.305701
	0.361238	0.043135	3.34115		0.361238	0.043135		1.32475	3.05163		0.304387	0.272182		8.91738	0.304387	0.272182
	0.355323	0.0109304	3.31288		0.355323	0.0109304		1.34184	3.01319		0.32739	0.273825		8.96667	0.32739	0.273825
	0.338563	0.0424778	3.30927		0.338563	0.0424778		1.3254	3.02699		0.2942	0.274811		8.92461	0.2942	0.274811
	0.324432	0.0191459	3.3349		0.324432	0.0191459		1.32343	3.04046		0.315231	0.261338		8.94137	0.315231	0.261338
	0.36781	0.059566	3.32669		0.36781	0.059566		1.37601	3.02699		0.2942	0.287299		8.91409	0.2942	0.287299
	0.336591	0.050036	3.3326		0.336591	0.050036		1.32639	3.07661		0.335934	0.252794		8.92099	0.335934	0.252794
	0.354008	0.0322906	3.3073		0.354008	0.0322906		1.36418	3.04868		0.344807	0.295514		8.98047	0.344807	0.295514
	0.338234	0.0490502	3.32866		0.338234	0.0490502		1.33296	3.0398		0.307673	0.27974		8.90062	0.307673	0.27974
	0.328376	0.0487216	3.33293		0.328376	0.0487216		1.35925	3.05032		0.37504	0.250165		8.97357	0.37504	0.250165
	0.359595	0.0342623	3.30697		0.359595	0.0342623		1.36155	3.05328		0.340535	0.292885		8.96601	0.340535	0.292885
	0.344478	0.0575943	3.28725		0.344478	0.0575943		1.36352	3.03685		0.312274	0.290256		8.96503	0.312274	0.290256
	0.343164	0.0270327	3.31749		0.343164	0.0270327		1.33658	3.05262		0.324104	0.289928		8.95057	0.324104	0.289928
	0.349736	0.0674528	3.30434		0.349736	0.0674528		1.32902	3.04079		0.32969	0.299786		8.96437	0.32969	0.299786
	0.370768	0.052665	3.34312		0.370768	0.052665		1.37601	3.03093		0.372082	0.229133		8.97028	0.372082	0.229133
	0.338892	0.0621949	3.33457		0.338892	0.0621949		1.35827	2.99413		0.334291	0.23932		8.97948	0.334291	0.23932
	0.326404	0.0786258	3.32964		0.326404	0.0786258		1.30372	3.02337		0.312274	0.252465		8.93644	0.312274	0.252465
	0.335277	0.0566084	3.33162		0.335277	0.0566084		1.33493	3.01943		0.289599	0.259366		8.95385	0.289599	0.259366
	0.360909	0.02769	3.34246		0.360909	0.02769		1.34676	3.02469		0.326733	0.267581		8.92526	0.326733	0.267581
	0.35368	0.0316334	3.3211		0.35368	0.0316334		1.36254	3.05393		0.329033	0.239978		8.89865	0.329033	0.239978
	0.361238	0.0378771	3.2912		0.361238	0.0378771		1.37963	3.01877		0.35828	0.269225		8.92658	0.35828	0.269225
	0.338234	0.0631808	3.28725		0.338234	0.0631808		1.29846	3.06774		0.325747	0.274154		8.91278	0.325747	0.274154
	0.302415	0.0460926	3.29613		0.302415	0.0460926		1.36451	3.0122		0.347436	0.275797		8.91836	0.347436	0.275797
	0.324104	0.0306475	3.29415		0.324104	0.0306475		1.37141	3.04276		0.312274	0.255094		8.93907	0.312274	0.255094
	0.322461	0.0556225	3.30664		0.322461	0.0556225		1.35235	3.00103		0.375368	0.287956		8.8694	0.375368	0.287956
	0.340535	0.0730393	3.3119		0.340535	0.0730393		1.36221	3.05262		0.332977	0.238006		8.95944	0.332977	0.238006
	0.330019	0.0382058	3.29481		0.330019	0.0382058		1.36352	3.04112		0.293871	0.251808		8.95254	0.293871	0.251808
	0.348422	0.0129021	3.32964		0.348422	0.0129021		1.3609	3.00398		0.290913	0.261666		8.91771	0.290913	0.261666
	0.357623	0.031962	3.28791		0.357623	0.031962		1.33789	3.01516		0.314574	0.255751		8.93939	0.314574	0.255751
	0.342507	0.0667956	3.30533		0.342507	0.0667956		1.35794	3.0398		0.343821	0.235705		8.93118	0.343821	0.235705
	0.323775	0.06811	3.3165		0.323775	0.06811		1.35892	3.00891		0.282369	0.250493		8.94991	0.282369	0.250493
	0.327719	0.0506933	3.29382		0.327719	0.0506933		1.33559	3.05952		0.354665	0.295843		8.95451	0.354665	0.295843
	0.338563	0.0667956	3.3027		0.338563	0.0667956		1.32409	3.026		0.361566	0.273497		8.88748	0.361566	0.273497
	0.316217	0.0230893	3.32669		0.316217	0.0230893		1.32968	3.01417		0.350393	0.25838		8.92921	0.350393	0.25838
	0.316546	0.0332765	3.30368		0.316546	0.0332765		1.35728	3.03586		0.341521	0.219275		8.94301	0.341521	0.219275
	0.345793	0.0237465	3.28988		0.345793	0.0237465		1.34512	3.00464		0.312274	0.23702		8.91902	0.312274	0.23702
	0.337577	0.0539794	3.31058		0.337577	0.0539794		1.36977	3.00366		0.343164	0.211059		8.96305	0.343164	0.211059
	0.341849	0.0359054	3.305		0.341849	0.0359054		1.35925	3.00037		0.330676	0.23932		9.01136	0.330676	0.23932
	0.343821	0.0612091	3.29185		0.343821	0.0612091		1.34512	3.07069		0.340206	0.292885		8.95188	0.340206	0.292885
	0.350393	0.038863	3.31058		0.350393	0.038863		1.33855	3.05393		0.301429	0.257066		8.92789	0.301429	0.257066
	0.349408	0.0493788	3.3142		0.349408	0.0493788		1.35235	3.01779		0.350393	0.249836		8.93348	0.350393	0.249836
	0.321475	0.0148738	3.34673		0.321475	0.0148738		1.35071	3.0168		0.304715	0.254108		8.92066	0.304715	0.254108
	0.327719	0.050036	3.26721		0.327719	0.050036		1.36155	3.02534		0.30833	0.245893		8.92428	0.30833	0.245893
	0.35828	0.0690959	3.27608		0.35828	0.0690959		1.34906	3.01286		0.338563	0.274154		8.93742	0.338563	0.274154
	0.334948	0.0382058	3.31091		0.334948	0.0382058		1.37733	3.04079		0.313917	0.273497		8.95024	0.313917	0.273497
	0.341521	0.0658097	3.28429		0.341521	0.0658097		1.35564	3.05065		0.28697	0.234062		8.88616	0.28697	0.234062
	0.335277	0.0700818	3.33162		0.335277	0.0700818		1.35367	3.00826		0.309973	0.258052		8.91705	0.309973	0.258052
	0.360252	0.0296617	3.30664		0.360252	0.0296617		1.3655	3.00563		0.313917	0.278097		8.94137	0.313917	0.278097
	0.366167	0.0516791	3.28101		0.366167	0.0516791		1.3678	3.02896		0.346121	0.240963		8.92559	0.346121	0.240963
	0.343821	0.0391916	3.27969		0.343821	0.0391916		1.35399	3.02962		0.330019	0.223218		8.93939	0.330019	0.223218
	0.343821	0.0395202	3.24618		0.343821	0.0395202		1.34512	3.00694		0.33692	0.218289		8.95977	0.33692	0.218289
	0.351379	0.0848696	3.31979		0.351379	0.0848696		1.33888	3.00924		0.309316	0.246221		8.95188	0.309316	0.246221
	0.310959	0.0533222	3.30303		0.310959	0.0533222		1.33165	2.97474		0.330676	0.26791		8.96404	0.330676	0.26791
	0.307344	0.0477357	3.31584		0.307344	0.0477357		1.35531	3.04013		0.313588	0.222889		8.93479	0.313588	0.222889
	0.35368	0.0727107	3.28824		0.35368	0.0727107		1.3678	3.04539		0.323775	0.26068		8.93677	0.323775	0.26068
	0.367482	0.0322906	3.29415		0.367482	0.0322906		1.36714	3.04933		0.324432	0.255423		8.95517	0.324432	0.255423
	0.369125	0.0648239	3.32077		0.369125	0.0648239		1.34972	3.05163		0.316546	0.253122		8.94991	0.316546	0.253122
	0.353351	0.0805975	3.25308		0.353351	0.0805975		1.35662	2.97474		0.292556	0.300443		8.94137	0.292556	0.300443
	0.340863	0.0418206	3.28364		0.340863	0.0418206		1.36352	3.00727		0.332977	0.245235		8.88682	0.332977	0.245235
	0.320818	0.0293331	3.29645		0.320818	0.0293331		1.31719	3.05098		0.300443	0.291571		8.96075	0.300443	0.291571
	0.342178	0.0349196	3.25439		0.342178	0.0349196		1.34216	2.99774		0.2988	0.26068		8.92395	0.2988	0.26068
	0.328047	0.0447781	3.29613		0.328047	0.0447781		1.3208	3.0375		0.328047	0.247864		8.92691	0.328047	0.247864
	0.311945	0.0408347	3.3119		0.311945	0.0408347		1.34315	3.0352		0.307673	0.246221		8.93644	0.307673	0.246221
	0.341849	0.0464212	3.29744		0.341849	0.0464212		1.37831	3.04013		0.291571	0.272511		8.99263	0.291571	0.272511
	0.326076	0.0372199	3.31814		0.326076	0.0372199		1.38061	3.05098		0.331991	0.262981		8.97488	0.331991	0.262981
	0.333962	0.102944	3.27411		0.333962	0.102944		1.36451	3.0306		0.339878	0.311616		8.94531	0.339878	0.311616
	0.302744	0.0858554	3.26556		0.302744	0.0858554		1.34874	3.03389		0.316546	0.311616		8.95352	0.316546	0.311616
	0.32016	0.0539794	3.30566		0.32016	0.0539794		1.36254	3.02995		0.322789	0.236691		8.97488	0.322789	0.236691
	0.345135	0.0562798	3.29448		0.345135	0.0562798		1.34315	3.0214		0.316546	0.280726		8.96667	0.316546	0.280726
	0.371754	0.0418206	3.23237		0.371754	0.0418206		1.35432	2.99347		0.316546	0.31556		8.94235	0.316546	0.31556
	0.317532	0.0227607	3.26918		0.317532	0.0227607		1.36845	3.05098		0.313259	0.261009		8.94662	0.313259	0.261009
	0.349408	0.0451067	3.27674		0.349408	0.0451067		1.36024	3.0467		0.290256	0.249836		8.97718	0.290256	0.249836
	0.319175	0.075011	3.26261		0.319175	0.075011		1.3678	3.04342		0.2988	0.250165		8.95188	0.2988	0.250165
	0.317203	0.0441209	3.27509		0.317203	0.0441209		1.35498	3.01746		0.347436	0.236363		8.95813	0.347436	0.236363
	0.345135	0.0648239	3.22909		0.345135	0.0648239		1.35629	3.01581		0.330676	0.292556		8.92362	0.330676	0.292556
	0.354665	0.0444495	3.23172		0.354665	0.0444495		1.35169	2.99314		0.30603	0.228805		8.95188	0.30603	0.228805
	0.325747	0.063838	3.29317		0.325747	0.063838		1.34841	3.03553		0.332319	0.226504		8.92264	0.332319	0.226504
	0.352694	0.0664669	3.27378		0.352694	0.0664669		1.37141	3.01121		0.321475	0.27514		8.87663	0.321475	0.27514
	0.318846	0.0483929	3.29251		0.318846	0.0483929		1.35859	3.02403		0.318189	0.245564		8.94465	0.318189	0.245564
	0.336263	0.0125735	3.27904		0.336263	0.0125735		1.31949	3.04999		0.321475	0.267253		8.93644	0.321475	0.267253
	0.353351	0.0217748	3.26392		0.353351	0.0217748		1.34151	2.99117		0.340206	0.26561		8.92986	0.340206	0.26561
	0.34875	0.0467498	3.24716		0.34875	0.0467498		1.37371	3.00826		0.367153	0.280398		8.9854	0.367153	0.280398
	0.399029	0.0408347	3.24322		0.399029	0.0408347		1.38193	3.05886		0.305044	0.261009		8.90982	0.305044	0.261009
	0.319832	0.0253896	3.23599		0.319832	0.0253896		1.31456	3.03225		0.314574	0.279412		8.9716	0.314574	0.279412
	0.321804	0.0717248	3.29645		0.321804	0.0717248		1.34085	2.97112		0.321146	0.285656		8.91639	0.321146	0.285656
	0.32509	0.0303189	3.26425		0.32509	0.0303189		1.33921	3.01516		0.313588	0.227819		8.90785	0.313588	0.227819
	0.343164	0.0467498	3.21989		0.343164	0.0467498		1.33559	2.98		0.380955	0.219603		8.95944	0.380955	0.219603
	0.325747	0.0372199	3.24848		0.325747	0.0372199		1.37601	3.05656		0.318189	0.245235		8.95484	0.318189	0.245235
	0.338892	0.0661383	3.24552		0.338892	0.0661383		1.34414	3.05229		0.292228	0.265281		8.94465	0.292228	0.265281
	0.338892	0.059566	3.24618		0.338892	0.059566		1.35958	3.01417		0.32509	0.276783		8.93381	0.32509	0.276783
	0.310631	0.0391916	3.2373		0.310631	0.0391916		1.34841	3.03619		0.305373	0.309973		8.95813	0.305373	0.309973
	0.335277	0.0635094	3.25768		0.335277	0.0635094		1.36024	3.02337		0.342507	0.222561		8.94465	0.342507	0.222561
	0.319175	0.0503646	3.21989		0.319175	0.0503646		1.35465	3.02534		0.333962	0.23702		8.93709	0.333962	0.23702
	0.305044	0.0704104	3.23829		0.305044	0.0704104		1.32343	3.06478		0.361566	0.307673		8.97324	0.361566	0.307673
	0.334948	0.0474071	3.23303		0.334948	0.0474071		1.33099	3.06774		0.295185	0.258052		8.94005	0.295185	0.258052
	0.345793	0.0805975	3.23237		0.345793	0.0805975		1.36845	3.02995		0.286641	0.270868		8.93249	0.286641	0.270868
	0.322132	0.0598946	3.20214		0.322132	0.0598946		1.38521	3.02107		0.307016	0.23702		8.93874	0.307016	0.23702
	0.335277	0.0470785	3.25275		0.335277	0.0470785		1.36615	3.0214		0.341192	0.282698		8.93249	0.341192	0.282698
	0.314574	0.0467498	3.24157		0.314574	0.0467498		1.37437	2.98755		0.292228	0.290913		8.94597	0.292228	0.290913
	0.2988	0.0296617	3.21331		0.2988	0.0296617		1.36517	3.03487		0.307673	0.239649		8.94662	0.307673	0.239649
	0.325418	0.0349196	3.20444		0.325418	0.0349196		1.34742	3.00858		0.38457	0.23702		8.86513	0.38457	0.23702
	0.346121	0.0296617	3.21693		0.346121	0.0296617		1.3724	3.0191		0.305701	0.300115		8.88255	0.305701	0.300115
	0.330676	0.0993288	3.24289		0.330676	0.0993288		1.37371	3.04638		0.324104	0.288613		8.92296	0.324104	0.288613
	0.324761	0.0283472	3.23632		0.324761	0.0283472		1.31555	3.04539		0.283355	0.262981		8.88682	0.283355	0.262981
	0.318517	0.0359054	3.2143		0.318517	0.0359054		1.33428	3.02337		0.359923	0.222561		8.92494	0.359923	0.222561
	0.326733	0.0477357	3.2235		0.326733	0.0477357		1.35531	3.06609		0.337577	0.280398		8.93512	0.337577	0.280398
	0.339549	0.0480643	3.21036		0.339549	0.0480643		1.32836	3.07759		0.356308	0.224532		8.90259	0.356308	0.224532
	0.313259	0.0280186	3.20017		0.313259	0.0280186		1.34414	3.03487		0.329033	0.249507		8.96798	0.329033	0.249507
	0.327719	0.0631808	3.19951		0.327719	0.0631808		1.36451	3.01877		0.361566	0.286641		8.91475	0.361566	0.286641
	0.347764	0.0592373	3.23599		0.347764	0.0592373		1.31883	3.04112		0.321804	0.261338		8.92395	0.321804	0.261338
	0.308987	0.0240752	3.25045		0.308987	0.0240752		1.33723	3.06544		0.353351	0.254437		8.88353	0.353351	0.254437
	0.315888	0.0733679	3.21759		0.315888	0.0733679		1.36122	3.03159		0.307673	0.279412		8.93808	0.307673	0.279412
	0.37504	0.0161883	3.21693		0.37504	0.0161883		1.35728	3.02107		0.305701	0.254765		8.89405	0.305701	0.254765
	0.300443	0.0411633	3.23402		0.300443	0.0411633		1.34282	3.09041		0.369125	0.291571		8.89076	0.369125	0.291571
	0.336591	0.0605518	3.22449		0.336591	0.0605518		1.36155	3.01384		0.367153	0.292228		8.87137	0.367153	0.292228
	0.318517	0.0483929	3.22284		0.318517	0.0483929		1.33493	3.00563		0.335934	0.293214		8.92001	0.335934	0.293214
	0.300115	0.0309762	3.22449		0.300115	0.0309762		1.35958	3.01121		0.366167	0.237677		8.93414	0.366167	0.237677
	0.302086	0.0579229	3.20444		0.302086	0.0579229		1.32047	3.05623		0.33922	0.248193		8.92494	0.33922	0.248193
	0.289928	0.0523364	3.18604		0.289928	0.0523364		1.34545	3.06346		0.319503	0.256408		8.94334	0.319503	0.256408
	0.293542	0.0342623	3.18604		0.293542	0.0342623		1.3655	3.0076		0.305373	0.239649		8.95582	0.305373	0.239649
	0.322461	0.0329479	3.19425		0.322461	0.0329479		1.33559	3.003		0.312274	0.28927		8.93118	0.312274	0.28927
	0.296171	0.0635094	3.18768		0.296171	0.0635094		1.35498	3.04933		0.313917	0.274482		8.87663	0.313917	0.274482
	0.305373	0.025061	3.17881		0.305373	0.025061		1.33822	2.99906		0.286313	0.244907		8.89306	0.286313	0.244907
	0.310631	0.0283472	3.23369		0.310631	0.0283472		1.37503	3.05886		0.341849	0.265281		8.91015	0.341849	0.265281
	0.304715	0.0575943	3.21989		0.304715	0.0575943		1.37371	3.06511		0.362224	0.263638		8.9555	0.362224	0.263638
	0.300772	0.0414919	3.2327		0.300772	0.0414919		1.35695	3.07727		0.380298	0.276126		8.88813	0.380298	0.276126
	0.323118	0.0447781	3.2028		0.323118	0.0447781		1.34019	3.06642		0.334948	0.25378		8.93939	0.334948	0.25378
	0.323118	0.0286758	3.20477		0.323118	0.0286758		1.36188	3.04638		0.345135	0.312602		8.92691	0.345135	0.312602
	0.313917	0.043135	3.18604		0.313917	0.043135		1.37667	3.03389		0.349736	0.253451		8.98474	0.349736	0.253451
	0.307673	0.0365627	3.23533		0.307673	0.0365627		1.35005	2.99774		0.297486	0.270539		8.95484	0.297486	0.270539
	0.321804	0.00665838	3.20247		0.321804	0.00665838		1.36254	3.01417		0.361566	0.22519		8.91804	0.361566	0.22519
	0.304715	0.0602232	3.19754		0.304715	0.0602232		1.35399	3.02436		0.359595	0.228805		8.92034	0.359595	0.228805
	0.335934	0.0612091	3.17552		0.335934	0.0612091		1.36648	3.01516		0.343164	0.280069		8.92559	0.343164	0.280069
	0.310959	0.0283472	3.17059		0.310959	0.0283472		1.33986	3.04736		0.319503	0.281055		8.89175	0.319503	0.281055
	0.331991	0.0612091	3.16994		0.331991	0.0612091		1.37601	3.04933		0.342178	0.22026		8.97948	0.342178	0.22026
	0.310302	0.0546367	3.19623		0.310302	0.0546367		1.35794	3.03816		0.343821	0.233405		8.90325	0.343821	0.233405
	0.307344	0.038863	3.1936		0.307344	0.038863		1.37075	2.99577		0.368139	0.312602		8.8602	0.368139	0.312602
	0.321475	0.0194745	3.19984		0.321475	0.0194745		1.33395	3.03257		0.322461	0.317203		8.89799	0.322461	0.317203
	0.330348	0.0365627	3.19162		0.330348	0.0365627		1.35498	3.04342		0.304387	0.250493		8.83621	0.304387	0.250493
	0.293871	0.102615	3.18275		0.293871	0.102615		1.35958	3.05623		0.341521	0.232419		8.89963	0.341521	0.232419
	0.30833	0.0414919	3.19655		0.30833	0.0414919		1.31982	3.03422		0.373397	0.249507		8.91081	0.373397	0.249507
	0.342835	0.0444495	3.20115		0.342835	0.0444495		1.34906	3.07299		0.321804	0.264953		8.89832	0.321804	0.264953
	0.345793	0.0411633	3.22186		0.345793	0.0411633		1.32442	3.00136		0.2965	0.259037		8.88419	0.2965	0.259037
	0.318189	0.0424778	3.17421		0.318189	0.0424778		1.30602	3.05196		0.313259	0.27514		8.91639	0.313259	0.27514
	0.368467	0.0372199	3.17552		0.368467	0.0372199		1.36451	3.01647		0.358937	0.223875		8.92362	0.358937	0.223875
	0.332648	0.0661383	3.15613		0.332648	0.0661383		1.39573	3.00858		0.319503	0.220589		8.95681	0.319503	0.220589
	0.337577	0.0234179	3.2028		0.337577	0.0234179		1.3724	2.96981		0.354008	0.241949		8.92494	0.354008	0.241949
	0.322461	0.0296617	3.17881		0.322461	0.0296617		1.37535	3.0099		0.296171	0.239649		8.91015	0.296171	0.239649
	0.317532	0.0566084	3.21167		0.317532	0.0566084		1.35465	3.01581		0.33692	0.273825		8.94662	0.33692	0.273825
	0.362881	0.0520077	3.17749		0.362881	0.0520077		1.33033	2.99708		0.252465	0.212045		8.96075	0.252465	0.212045
	0.315888	0.0299903	3.1936		0.315888	0.0299903		1.35301	2.98098		0.305701	0.241949		8.90752	0.305701	0.241949
	0.339878	0.0296617	3.19951		0.339878	0.0296617		1.31686	2.96948		0.300443	0.263638		8.91935	0.300443	0.263638
	0.319503	0.0671242	3.18209		0.319503	0.0671242		1.35268	2.99938		0.26791	0.321804		8.92855	0.26791	0.321804
	0.305701	0.0687673	3.18275		0.305701	0.0687673		1.34249	3.04736		0.285984	0.231762		8.86842	0.285984	0.231762
	0.327061	0.0227607	3.16895		0.327061	0.0227607		1.34118	3.02272		0.312274	0.296171		8.97686	0.312274	0.296171
	0.336263	0.0355768	3.18801		0.336263	0.0355768		1.34118	3.09173		0.345793	0.287627		8.92724	0.345793	0.287627
	0.336591	0.0273613	3.14003		0.336591	0.0273613		1.36714	3.04408		0.331005	0.24425		8.92231	0.331005	0.24425
	0.332319	0.0322906	3.19162		0.332319	0.0322906		1.35564	2.98164		0.326733	0.251151		8.94334	0.326733	0.251151
	0.34875	0.0480643	3.18998		0.34875	0.0480643		1.33723	3.03225		0.331662	0.229133		8.90653	0.331662	0.229133
	0.301429	0.0339337	3.16238		0.301429	0.0339337		1.37831	3.02436		0.288284	0.236034		8.9532	0.288284	0.236034
	0.311616	0.0608804	3.16369		0.311616	0.0608804		1.35137	2.98985		0.326733	0.252136		8.95155	0.326733	0.252136
	0.339878	0.043135	3.16632		0.339878	0.043135		1.36878	3.02764		0.347436	0.276126		8.94334	0.347436	0.276126
	0.317203	0.0375485	3.19853		0.317203	0.0375485		1.36878	3.00563		0.368796	0.251479		8.86316	0.368796	0.251479
	0.318846	0.0214462	3.19162		0.318846	0.0214462		1.33625	3.05853		0.320489	0.257394		8.92395	0.320489	0.257394
	0.326404	0.0460926	3.19327		0.326404	0.0460926		1.37075	3.02567		0.380626	0.266596		8.8648	0.380626	0.266596
	0.317532	0.0313048	3.1982		0.317532	0.0313048		1.34906	3.00333		0.354008	0.21566		8.9555	0.354008	0.21566
	0.32969	0.0391916	3.17979		0.32969	0.0391916		1.32869	3.02107		0.368139	0.217303		8.87564	0.368139	0.217303
	0.32509	0.02769	3.14956		0.32509	0.02769		1.34644	3.07332		0.311945	0.256737		8.91738	0.311945	0.256737
	0.307673	0.059566	3.14529		0.307673	0.059566		1.3724	3.00826		0.361895	0.23472		8.93644	0.361895	0.23472
	0.311288	0.052665	3.19327		0.311288	0.052665		1.38883	3.04342		0.316217	0.257066		8.86743	0.316217	0.257066
	0.295185	0.0723821	3.15745		0.295185	0.0723821		1.32442	3.03159		0.337249	0.215003		8.88517	0.337249	0.215003
	0.326733	0.0299903	3.1489		0.326733	0.0299903		1.31587	2.99938		0.318189	0.25608		8.90949	0.318189	0.25608
	0.33462	0.0503646	3.15088		0.33462	0.0503646		1.33658	2.99281		0.337577	0.257723		8.85527	0.337577	0.257723
	0.32739	0.0372199	3.15581		0.32739	0.0372199		1.32212	2.99643		0.354008	0.254108		8.8786	0.354008	0.254108
	0.320818	0.00632976	3.17947		0.320818	0.00632976		1.37141	3.0076		0.37011	0.303401		8.90719	0.37011	0.303401
	0.338892	0.0615377	3.15613		0.338892	0.0615377		1.40493	3.05952		0.321475	0.318846		8.94958	0.321475	0.318846
	0.324432	0.0529936	3.15876		0.324432	0.0529936		1.36254	3.05393		0.330348	0.241621		8.92034	0.330348	0.241621
	0.288613	0.00928733	3.11999		0.288613	0.00928733		1.34972	3.04802		0.338234	0.23702		8.9417	0.338234	0.23702
	0.323775	0.0352482	3.17749		0.323775	0.0352482		1.36352	3.00727		0.331991	0.261666		8.88255	0.331991	0.261666
	0.341849	0.070739	3.13773		0.341849	0.070739		1.3793	3.04966		0.345793	0.281383		8.91508	0.345793	0.281383
	0.326076	0.0477357	3.14956		0.326076	0.0477357		1.36878	3.0306		0.307016	0.236363		8.95911	0.307016	0.236363
	0.297157	0.020789	3.15548		0.297157	0.020789		1.377	3.04243		0.342835	0.250493		8.92362	0.342835	0.250493
	0.304387	0.0309762	3.11736		0.304387	0.0309762		1.36648	3.04802		0.324432	0.214674		8.93907	0.324432	0.214674
	0.308659	0.006987	3.11144		0.308659	0.006987		1.39343	3.00793		0.317203	0.210402		8.97883	0.317203	0.210402
	0.33692	0.0398489	3.1512		0.33692	0.0398489		1.35695	2.98854		0.302086	0.287627		8.94761	0.302086	0.287627
	0.339878	0.0286758	3.11177		0.339878	0.0286758		1.37042	2.97605		0.330019	0.282041		8.90193	0.330019	0.282041
	0.335606	0.0293331	3.12426		0.335606	0.0293331		1.36944	3.00957		0.328705	0.260352		8.89503	0.328705	0.260352
	0.354008	0.0487216	3.12722		0.354008	0.0487216		1.34841	3.00398		0.351708	0.278755		8.93052	0.351708	0.278755
	0.325747	0.0503646	3.14365		0.325747	0.0503646		1.35794	3.09895		0.319175	0.244907		8.89536	0.319175	0.244907
	0.310302	0.0411633	3.16698		0.310302	0.0411633		1.34512	3.03849		0.304715	0.240635		8.95122	0.304715	0.240635
	0.2988	0.0214462	3.11834		0.2988	0.0214462		1.33263	3.0007		0.356637	0.276126		8.8533	0.356637	0.276126
	0.321804	0.0694245	3.13839		0.321804	0.0694245		1.30996	3.06379		0.339878	0.27514		8.90818	0.339878	0.27514
	0.284341	0.0385344	3.1397		0.284341	0.0385344		1.34742	2.99774		0.366167	0.1966		8.94235	0.366167	0.1966
	0.362881	0.0533222	3.14135		0.362881	0.0533222		1.38587	3.01713		0.335277	0.245235		8.91541	0.335277	0.245235
	0.303401	0.0411633	3.11177		0.303401	0.0411633		1.36845	3.03685		0.329362	0.224204		8.87696	0.329362	0.224204
	0.301429	0.0510219	3.13477		0.301429	0.0510219		1.39441	3.01746		0.33692	0.270539		8.91278	0.33692	0.270539
	0.317532	0.0533222	3.18374		0.317532	0.0533222		1.38258	3.00826		0.335934	0.238992		8.8924	0.335934	0.238992
	0.322789	0.0339337	3.16073		0.322789	0.0339337		1.37437	3.02863		0.307673	0.240635		8.90949	0.307673	0.240635
	0.313917	0.0727107	3.13182		0.313917	0.0727107		1.34315	3.04736		0.326404	0.261009		8.9486	0.326404	0.261009
	0.304058	0.0230893	3.1351		0.304058	0.0230893		1.37897	3.03882		0.409545	0.287627		8.85593	0.409545	0.287627
	0.359595	0.0543081	3.14167		0.359595	0.0543081		1.39014	3.01516		0.347436	0.259366		8.90621	0.347436	0.259366
	0.325747	0.0621949	3.11111		0.325747	0.0621949		1.37765	3.0191		0.306358	0.230448		8.8878	0.306358	0.230448
	0.313588	0.0615377	3.12623		0.313588	0.0615377		1.35629	3.01154		0.295843	0.266596		8.89306	0.295843	0.266596
	0.316217	0.0490502	3.1098		0.316217	0.0490502		1.32475	3.04112		0.31786	0.204815		8.93512	0.31786	0.204815
	0.345135	0.0480643	3.15055		0.345135	0.0480643		1.3816	3.06938		0.318189	0.268896		8.93184	0.318189	0.268896
	0.314245	0.0559512	3.13576		0.314245	0.0559512		1.34676	3.02633		0.329362	0.255094		8.9039	0.329362	0.255094
	0.31556	0.0447781	3.10224		0.31556	0.0447781		1.35005	3.05689		0.333634	0.264624		8.93709	0.333634	0.264624
	0.32739	0.050036	3.12097		0.32739	0.050036		1.35925	3.01647		0.359595	0.28697		8.91541	0.359595	0.28697
	0.316546	0.0398489	3.17026		0.316546	0.0398489		1.35531	2.9869		0.324432	0.273168		8.94137	0.324432	0.273168
	0.343821	0.0460926	3.0891		0.343821	0.0460926		1.36155	3.05853		0.363538	0.24425		8.98211	0.363538	0.24425
	0.297157	0.0306475	3.13806		0.297157	0.0306475		1.35892	2.99117		0.352036	0.282698		8.93808	0.352036	0.282698
	0.309973	0.0615377	3.1443		0.309973	0.0615377		1.34512	2.97868		0.305701	0.255751		8.87039	0.305701	0.255751
	0.333962	0.0582515	3.13806		0.333962	0.0582515		1.36517	3.003		0.304715	0.224532		8.86086	0.304715	0.224532
	0.300115	0.0322906	3.10717		0.300115	0.0322906		1.35334	3.03915		0.357952	0.279412		8.87433	0.357952	0.279412
	0.340535	0.0506933	3.10323		0.340535	0.0506933		1.33822	3.0444		0.321146	0.255751		8.88025	0.321146	0.255751
	0.291242	0.0447781	3.13872		0.291242	0.0447781		1.34578	3.00366		0.338892	0.272839		8.88682	0.338892	0.272839
	0.32969	0.0704104	3.1075		0.32969	0.0704104		1.38324	3.0283		0.33462	0.284012		8.94301	0.33462	0.284012
	0.333962	0.0391916	3.08811		0.333962	0.0391916		1.33625	3.01779		0.362881	0.240635		8.95287	0.362881	0.240635
	0.334948	0.0549653	3.15482		0.334948	0.0549653		1.37568	3.05788		0.325747	0.25378		8.9716	0.325747	0.25378
	0.334948	0.0342623	3.1167		0.334948	0.0342623		1.3747	3.01023		0.333634	0.218289		8.94235	0.333634	0.218289
	0.305044	0.0575943	3.10816		0.305044	0.0575943		1.37042	2.98262		0.330676	0.289599		8.87334	0.330676	0.289599
	0.290585	0.00764424	3.09534		0.290585	0.00764424		1.35761	2.99478		0.360252	0.245893		8.92526	0.360252	0.245893
	0.337577	0.0690959	3.10881		0.337577	0.0690959		1.33986	2.97047		0.337249	0.285984		8.9039	0.337249	0.285984
	0.320818	0.0520077	3.0983		0.320818	0.0520077		1.37897	3.01581		0.352036	0.285327		8.89799	0.352036	0.285327
	0.318846	0.0562798	3.08548		0.318846	0.0562798		1.37305	3.0076		0.369782	0.270539		8.90193	0.369782	0.270539
	0.30833	0.0293331	3.08482		0.30833	0.0293331		1.3931	2.97079		0.331662	0.21796		8.90193	0.331662	0.21796
	0.341521	0.0690959	3.12262		0.341521	0.0690959		1.35498	3.07069		0.326404	0.27514		8.92296	0.326404	0.27514
	0.330348	0.0520077	3.09304		0.330348	0.0520077		1.38258	2.98854		0.341521	0.242606		8.8855	0.341521	0.242606
	0.306358	0.0582515	3.09633		0.306358	0.0582515		1.30733	2.98887		0.310631	0.272511		8.89799	0.310631	0.272511
	0.282041	0.0497074	3.10356		0.282041	0.0497074		1.34019	3.05328		0.27974	0.271525		8.90193	0.27974	0.271525
	0.287299	0.036234	3.09468		0.287299	0.036234		1.35662	3.00267		0.34875	0.284012		8.90489	0.34875	0.284012
	0.297157	0.0230893	3.09895		0.297157	0.0230893		1.38456	3.0122		0.362552	0.243592		8.93644	0.362552	0.243592
	0.32016	0.0204604	3.09008		0.32016	0.0204604		1.36582	2.9915		0.380298	0.253122		8.89635	0.380298	0.253122
	0.306358	0.0467498	3.11473		0.306358	0.0467498		1.37273	2.98985		0.319832	0.273168		8.91179	0.319832	0.273168
	0.312274	0.0467498	3.12064		0.312274	0.0467498		1.3609	3.02436		0.308659	0.316217		8.92428	0.308659	0.316217
	0.310302	0.0447781	3.10848		0.310302	0.0447781		1.39113	3.04013		0.325747	0.249179		8.90851	0.325747	0.249179
	0.319832	0.0562798	3.08942		0.319832	0.0562798		1.36484	3.02764		0.293542	0.266596		8.93742	0.293542	0.266596
	0.308002	0.0322906	3.06839		0.308002	0.0322906		1.37338	3.0306		0.341192	0.251151		8.89963	0.341192	0.251151
	0.308659	0.0690959	3.06938		0.308659	0.0690959		1.35991	3.03126		0.340863	0.271854		8.86447	0.340863	0.271854
	0.311945	0.056937	3.08548		0.311945	0.056937		1.36714	3.03882		0.307673	0.261009		8.89602	0.307673	0.261009
	0.311945	0.052665	3.07957		0.311945	0.052665		1.33362	3.02436		0.287627	0.283684		8.90949	0.287627	0.283684
	0.305044	0.0605518	3.06708		0.305044	0.0605518		1.31456	3.03849		0.280398	0.250493		8.88945	0.280398	0.250493
	0.314245	0.0533222	3.08154		0.314245	0.0533222		1.36122	3.05952		0.33922	0.234391		8.9039	0.33922	0.234391
	0.319832	0.0661383	3.05525		0.319832	0.0661383		1.38324	3.00333		0.352694	0.237349		8.88682	0.352694	0.237349
	0.295514	0.0437923	3.11144		0.295514	0.0437923		1.36352	3.04079		0.313588	0.283027		8.91081	0.313588	0.283027
	0.308987	0.0313048	3.10388		0.308987	0.0313048		1.34841	3.01976		0.33922	0.25608		8.93479	0.33922	0.25608
	0.307673	0.0451067	3.06774		0.307673	0.0451067		1.3862	3.01614		0.308987	0.268896		8.90982	0.308987	0.268896
	0.316874	0.0589087	3.07595		0.316874	0.0589087		1.34841	3.01056		0.355323	0.255094		8.88485	0.355323	0.255094
	0.310302	0.0395202	3.07464		0.310302	0.0395202		1.34052	2.99478		0.326404	0.294857		8.86414	0.326404	0.294857
	0.310631	0.0700818	3.08318		0.310631	0.0700818		1.40132	3.06084		0.341192	0.295514		8.88682	0.341192	0.295514
	0.288284	0.0543081	3.06609		0.288284	0.0543081		1.35169	3.02502		0.287956	0.259695		8.90423	0.287956	0.259695
	0.313917	0.0339337	3.0799		0.313917	0.0339337		1.35761	3.02272		0.32016	0.319832		8.88682	0.32016	0.319832
	0.314903	0.02769	3.10717		0.314903	0.02769		1.38226	3.0237		0.289599	0.250493		8.89142	0.289599	0.250493
	0.316546	0.0352482	3.09501		0.316546	0.0352482		1.36451	2.99248		0.329033	0.322461		8.8786	0.329033	0.322461
	0.327061	0.0132308	3.09731		0.327061	0.0132308		1.36648	3.00661		0.32509	0.284341		8.90062	0.32509	0.284341
	0.305701	0.043135	3.08942		0.305701	0.043135		1.37963	3.03159		0.322461	0.257394		8.93874	0.322461	0.257394
	0.320818	0.0483929	3.09928		0.320818	0.0483929		1.35695	3.05229		0.323447	0.276126		8.90752	0.323447	0.276126
	0.298472	0.0480643	3.09731		0.298472	0.0480643		1.37042	3.08055		0.380298	0.261009		8.88485	0.380298	0.261009
	0.299129	0.0608804	3.08712		0.299129	0.0608804		1.39376	3.02107		0.2988	0.240635		8.89339	0.2988	0.240635
	0.309316	0.0549653	3.07694		0.309316	0.0549653		1.38784	3.03619		0.349736	0.246879		8.94301	0.349736	0.246879
	0.341521	0.0562798	3.08844		0.341521	0.0562798		1.35137	3.03849		0.300115	0.261666		8.93217	0.300115	0.261666
	0.318846	0.0145452	3.096		0.318846	0.0145452		1.35827	3.00957		0.337249	0.251479		8.88846	0.337249	0.251479
	0.321475	0.0575943	3.09534		0.321475	0.0575943		1.39277	3.01779		0.382927	0.247864		8.8855	0.382927	0.247864
	0.325418	0.0474071	3.06675		0.325418	0.0474071		1.37371	2.9869		0.301429	0.261666		8.93709	0.301429	0.261666
	0.313917	0.050036	3.07234		0.313917	0.050036		1.36517	3.06642		0.313588	0.241621		8.88156	0.313588	0.241621
	0.276126	0.025061	3.07037		0.276126	0.025061		1.3701	3.02469		0.328705	0.316217		8.88255	0.328705	0.316217
	0.314574	0.0769827	3.05131		0.314574	0.0769827		1.35761	3.01779		0.331662	0.268896		8.95254	0.331662	0.268896
	0.332977	0.0365627	3.07661		0.332977	0.0365627		1.34906	2.96521		0.363209	0.261009		8.86513	0.363209	0.261009
	0.32739	0.0286758	3.0937		0.32739	0.0286758		1.34939	2.99117		0.392457	0.269553		8.88813	0.392457	0.269553
	0.30373	0.036234	3.05098		0.30373	0.036234		1.3655	3.04473		0.344478	0.31556		8.92954	0.344478	0.31556
	0.301429	0.0510219	3.03652		0.301429	0.0510219		1.36451	3.02534		0.349736	0.272182		8.8625	0.349736	0.272182
	0.295843	0.0615377	3.06708		0.295843	0.0615377		1.37765	2.98624		0.350065	0.26068		8.93381	0.350065	0.26068
	0.319503	0.0152025	3.05853		0.319503	0.0152025		1.36615	2.97375		0.321475	0.276454		8.92001	0.321475	0.276454
	0.30833	0.0309762	3.06478		0.30833	0.0309762		1.39047	3.00924		0.349408	0.225518		8.89306	0.349408	0.225518
	0.30833	0.0546367	3.06806		0.30833	0.0546367		1.36517	3.01614		0.34645	0.258709		8.92198	0.34645	0.258709
	0.282041	0.0687673	3.03225		0.282041	0.0687673		1.35169	2.96126		0.304058	0.209416		8.9532	0.304058	0.209416
	0.308987	0.0631808	3.03652		0.308987	0.0631808		1.36287	2.97572		0.308002	0.276783		8.84574	0.308002	0.276783
	0.340535	0.0447781	3.06412		0.340535	0.0447781		1.3747	3.00661		0.33692	0.263638		8.89766	0.33692	0.263638
	0.309645	0.0493788	3.06248		0.309645	0.0493788		1.39441
	0.32969	0.0487216	3.06412		0.32969	0.0487216		1.39146
	0.337249	0.0447781	3.07464		0.337249	0.0447781		1.37897
	0.305373	0.0401775	3.03849		0.305373	0.0401775		1.3724
	0.321804	0.0533222	3.04243		0.321804	0.0533222		1.37273
	0.335277	0.0244038	3.03816		0.335277	0.0244038		1.33231
	0.317203	0.0559512	3.03652		0.317203	0.0559512		1.37667
	0.301429	0.0234179	3.03849		0.301429	0.0234179		1.37075
	0.358609	0.0375485	3.05098		0.358609	0.0375485		1.35827
	0.340535	0.0513505	3.07891		0.340535	0.0513505		1.35695
	0.326076	0.0217748	3.04013		0.326076	0.0217748		1.37174
	0.318846	0.0365627	3.05065		0.318846	0.0365627		1.36878
	0.321146	0.0552939	3.04178		0.321146	0.0552939		1.37108
	0.317203	0.0444495	3.03356		0.317203	0.0444495		1.35991
	0.298143	0.0336051	3.04703		0.298143	0.0336051		1.36615
	0.308659	0.063838	3.0283		0.308659	0.063838		1.35958
	0.328705	0.0694245	3.05919		0.328705	0.0694245		1.34019
	0.313259	0.036234	3.04408		0.313259	0.036234		1.35761
	0.307344	0.0424778	3.01779		0.307344	0.0424778		1.35268
	0.312274	0.0566084	3.03619		0.312274	0.0566084		1.36122
	0.283355	0.036234	3.05065		0.283355	0.036234		1.35958
	0.308002	0.0520077	3.03849		0.308002	0.0520077		1.33691
	0.314903	0.0736966	3.03553		0.314903	0.0736966		1.35334
	0.307673	0.0618663	3.07529		0.307673	0.0618663		1.40592
	0.282369	0.0520077	3.00661		0.282369	0.0520077		1.38686
	0.288942	0.031962	3.02962		0.288942	0.031962		1.3839
	0.307016	0.0487216	2.99708		0.307016	0.0487216		1.3701
	0.328705	0.0102732	3.06018		0.328705	0.0102732		1.39507
	0.316217	0.0273613	3.01976		0.316217	0.0273613		1.35827
	0.304715	0.0332765	3.03947		0.304715	0.0332765		1.36517
	0.2942	0.0533222	3.00596		0.2942	0.0533222		1.36582
	0.321475	0.0441209	3.00694		0.321475	0.0441209		1.39047
	0.338234	0.0257183	3.0375		0.338234	0.0257183		1.3747
	0.315231	0.0378771	2.99906		0.315231	0.0378771		1.35038
	0.28697	0.0441209	3.01023		0.28697	0.0441209		1.37108
	0.27514	0.0293331	3.03027		0.27514	0.0293331		1.39606
	0.306358	0.0401775	3.0444		0.306358	0.0401775		1.3632
	0.325747	0.0529936	3.01516		0.325747	0.0529936		1.39376
	0.321475	0.0549653	3.01812		0.321475	0.0549653		1.36944
	0.333634	0.045764	2.98657		0.333634	0.045764		1.36057
	0.321146	0.0740252	3.00037		0.321146	0.0740252		1.36714
	0.290913	0.0605518	3.03816		0.290913	0.0605518		1.35629
	0.303401	0.059566	3.02896		0.303401	0.059566		1.39277
	0.315888	0.0467498	3.03717		0.315888	0.0467498		1.35794
	0.327719	0.052665	3.01812		0.327719	0.052665		1.37733
	0.294528	0.0398489	3.01384		0.294528	0.0398489		1.36714
	0.292556	0.0713962	3.0283		0.292556	0.0713962		1.35005
	0.293214	0.0365627	3.02863		0.293214	0.0365627		1.38948
	0.304058	0.013888	2.9823		0.304058	0.013888		1.34874
	0.327719	0.0579229	3.0076		0.327719	0.0579229		1.36714
	0.324761	0.0460926	3.01483		0.324761	0.0460926		1.36615
	0.284998	0.0332765	2.98328		0.284998	0.0332765		1.38948
	0.296171	0.0339337	2.99577		0.296171	0.0339337		1.35991
	0.321146	0.0224321	2.99511		0.321146	0.0224321		1.36648
	0.302086	0.043135	2.99084		0.302086	0.043135		1.3655
	0.322461	0.0188173	3.003		0.322461	0.0188173		1.3908
	0.330348	0.0451067	2.97342		0.330348	0.0451067		1.34611
	0.323447	0.0414919	2.99051		0.323447	0.0414919		1.36385
	0.27974	0.0401775	3.00793		0.27974	0.0401775		1.36418
	0.31556	0.0520077	3.01812		0.31556	0.0520077		1.35038
	0.291242	0.038863	3.00793		0.291242	0.038863		1.35432
	0.27514	0.0355768	3.00234		0.27514	0.0355768		1.37568
	0.292885	0.0421492	3.01812		0.292885	0.0421492		1.36977
	0.342178	0.0424778	2.98295		0.342178	0.0424778		1.37568
	0.311288	0.0539794	2.99873		0.311288	0.0539794		1.36714
	0.30833	0.0437923	3.02107		0.30833	0.0437923		1.38127
	0.32969	0.031962	2.98427		0.32969	0.031962		1.37503
	0.324432	0.00830147	2.98		0.324432	0.00830147		1.37273
	0.320818	0.0405061	3.01056		0.320818	0.0405061		1.35432
	0.325747	0.0339337	3.04046		0.325747	0.0339337		1.36155
	0.319503	0.0549653	2.97507		0.319503	0.0549653		1.36385
	0.334948	0.0135594	2.99084		0.334948	0.0135594		1.377
	0.350393	0.0290044	3.00037		0.350393	0.0290044		1.35399
	0.335606	0.0487216	3.00004		0.335606	0.0487216		1.38357
	0.313259	0.0336051	2.97014		0.313259	0.0336051		1.3839
	0.295843	0.0451067	2.99971		0.295843	0.0451067		1.37273
	0.323447	0.0474071	2.93267		0.323447	0.0474071		1.36254
	0.314574	0.0405061	2.96258		0.314574	0.0405061		1.39967
	0.276454	0.0148738	2.95896		0.276454	0.0148738		1.3655
	0.298143	0.0483929	2.99643		0.298143	0.0483929		1.36352
	0.300772	0.0424778	2.98722		0.300772	0.0424778		1.37207
	0.321804	0.056937	3.00037		0.321804	0.056937		1.36944
	0.297814	0.0234179	3.00267		0.297814	0.0234179		1.35367
	0.299786	0.0198031	2.98427		0.299786	0.0198031		1.36911
	0.323447	0.0621949	3.0145		0.323447	0.0621949		1.41117
	0.291571	0.0513505	2.9823		0.291571	0.0513505		1.38193
	0.297157	0.0296617	2.97638		0.297157	0.0296617		1.39671
	0.302744	0.0746824	2.96882		0.302744	0.0746824		1.37207
	0.28927	0.0408347	2.96981		0.28927	0.0408347		1.36188
	0.311945	0.06811	2.95765		0.311945	0.06811		1.37503
	0.2988	0.0773114	2.95995		0.2988	0.0773114		1.36418
	0.295514	0.0897989	2.95864		0.295514	0.0897989		1.37963
	0.308002	0.0290044	2.97112		0.308002	0.0290044		1.36057
	0.279412	0.0539794	3.01746		0.279412	0.0539794		1.35465
	0.308987	0.0372199	2.95009		0.308987	0.0372199		1.3655
	0.314574	0.0539794	2.95896		0.314574	0.0539794		1.4069
	0.305373	0.0612091	2.98492		0.305373	0.0612091		1.36845
	0.28697	0.0309762	2.97572		0.28697	0.0309762		1.36221
	0.304715	0.0411633	2.96521		0.304715	0.0411633		1.39606
	0.324761	0.0280186	2.99117		0.324761	0.0280186		1.4023
	0.318517	0.0559512	2.96586		0.318517	0.0559512		1.3678
	0.290913	0.0533222	2.93629		0.290913	0.0533222		1.36287
	0.300443	0.0842124	2.96554		0.300443	0.0842124		1.37864
	0.281055	0.0592373	2.94056		0.281055	0.0592373		1.35859
	0.313917	0.0641666	2.95765		0.313917	0.0641666		1.34644
	0.292228	0.0283472	2.95535		0.292228	0.0283472		1.3724
	0.274482	0.0510219	2.94352		0.274482	0.0510219		1.37108
	0.308002	0.050036	2.95403		0.308002	0.050036		1.33296
	0.289928	0.0405061	2.96586		0.289928	0.0405061		1.38751
	0.261995	0.0329479	2.97934		0.261995	0.0329479		1.34939
	0.302086	0.0483929	2.99807		0.302086	0.0483929		1.34874
	0.300772	0.0612091	2.97474		0.300772	0.0612091		1.35991
	0.266596	0.031962	2.93728		0.266596	0.031962		1.38916
	0.276454	0.0142166	2.95601		0.276454	0.0142166		1.36878
	0.314245	0.0562798	2.96126		0.314245	0.0562798		1.35662
	0.269225	0.0198031	2.96258		0.269225	0.0198031		1.37601
	0.291571	0.0487216	2.92709		0.291571	0.0487216		1.36221
	0.309973	0.0552939	2.93695		0.309973	0.0552939		1.37601
	0.283355	0.0336051	2.94286		0.283355	0.0336051		1.35761
	0.273825	0.0385344	2.94943		0.273825	0.0385344		1.36254
	0.311288	0.0592373	2.94878		0.311288	0.0592373		1.36484
	0.270868	0.0447781	2.92413		0.270868	0.0447781		1.35794
	0.291242	0.0405061	2.94845		0.291242	0.0405061		1.38423
	0.299786	0.0303189	2.94352		0.299786	0.0303189		1.35498
	0.314245	0.0171742	2.92775		0.314245	0.0171742		1.37404
	0.314903	0.0460926	2.97211		0.314903	0.0460926		1.34414
	0.318846	0.0336051	2.93793		0.318846	0.0336051		1.35958
	0.314245	0.0773114	2.93892		0.314245	0.0773114		1.34184
	0.309645	0.0477357	2.90803		0.309645	0.0477357		1.34906
	0.326076	0.0779686	2.94845		0.326076	0.0779686		1.34742
	0.297157	0.0418206	2.95371		0.297157	0.0418206		1.36254
	0.293542	0.0368913	2.93399		0.293542	0.0368913		1.34611
	0.28697	0.0293331	2.93497		0.28697	0.0293331		1.37404
	0.269882	0.0520077	2.95831		0.269882	0.0520077		1.34118
	0.290913	0.0401775	2.94976		0.290913	0.0401775		1.34939
	0.291571	0.0434637	2.95962		0.291571	0.0434637		1.3931
	0.300772	0.0368913	2.95042		0.300772	0.0368913		1.34611
	0.28697	0.0434637	2.92544		0.28697	0.0434637		1.35892
	0.272182	0.0201317	2.94648		0.272182	0.0201317		1.3747
	0.259037	0.0487216	2.95765		0.259037	0.0487216		1.35958
	0.281055	0.0684387	2.90869		0.281055	0.0684387		1.36517
	0.301101	0.0401775	2.93037		0.301101	0.0401775		1.37831
	0.291571	0.0480643	2.96948		0.291571	0.0480643		1.39507
	0.257723	0.056937	2.93925		0.257723	0.056937		1.35104
	0.297814	0.0497074	2.9422		0.297814	0.0497074		1.377
	0.275468	0.0339337	2.91756		0.275468	0.0339337		1.37042
	0.291899	0.0720535	2.9192		0.291899	0.0720535		1.38423
	0.248193	0.0674528	2.9146		0.248193	0.0674528		1.37765
	0.291242	0.0385344	2.93103		0.291242	0.0385344		1.35235
	0.304715	0.0306475	2.92807		0.304715	0.0306475		1.37207
	0.274482	0.0428064	2.97572		0.274482	0.0428064		1.3954
	0.297814	0.081912	2.93465		0.297814	0.081912		1.36155
	0.304387	0.0460926	2.89455		0.304387	0.0460926		1.36681
	0.2965	0.0283472	2.95371		0.2965	0.0283472		1.38028
	0.307673	0.0493788	2.87517		0.307673	0.0493788		1.377
	0.303072	0.0145452	2.88141		0.303072	0.0145452		1.34545
	0.288942	0.0523364	2.9192		0.288942	0.0523364		1.40033
	0.308659	0.0635094	2.92347		0.308659	0.0635094		1.36287
	0.305701	0.0513505	2.90606		0.305701	0.0513505		1.39113
	0.323775	0.0188173	2.91		0.323775	0.0188173		1.37338
	0.304715	0.0497074	2.90211		0.304715	0.0497074		1.37503
	0.288613	0.0444495	2.92643		0.288613	0.0444495		1.35695
	0.282698	0.0704104	2.92249		0.282698	0.0704104		1.35465
	0.28927	0.0437923	2.91526		0.28927	0.0437923		1.36648
	0.32016	0.0483929	2.92183		0.32016	0.0483929		1.36582
	0.275468	0.0582515	2.91789		0.275468	0.0582515		1.37634
	0.282369	0.0260469	2.92643		0.282369	0.0260469		1.35038
	0.304387	0.0641666	2.92709		0.304387	0.0641666		1.35301
	0.307673	0.0513505	2.93465		0.307673	0.0513505		1.3724
	0.264624	0.0667956	2.94549		0.264624	0.0667956		1.37141
	0.291242	0.0674528	2.91427		0.291242	0.0674528		1.38061
	0.278755	0.0132308	2.92019		0.278755	0.0132308		1.3908
	0.288613	0.038863	2.91756		0.288613	0.038863		1.35367
	0.274154	0.0539794	2.9192		0.274154	0.0539794		1.37075
	0.339549	0.063838	2.91526		0.339549	0.063838		1.37831
	0.30833	0.0552939	2.90277		0.30833	0.0552939		1.33592
	0.333305	0.0395202	2.87319		0.333305	0.0395202		1.35991
	0.279083	0.0648239	2.89521		0.279083	0.0648239		1.34676
	0.284341	0.02769	2.92347		0.284341	0.02769		1.39179
	0.314245	0.0736966	2.89653		0.314245	0.0736966		1.37765
	0.2965	0.0129021	2.90178		0.2965	0.0129021		1.38291
	0.284341	0.0648239	2.88338		0.284341	0.0648239		1.36122
	0.302086	0.013888	2.88601		0.302086	0.013888		1.38028
	0.303401	0.0566084	2.9054		0.303401	0.0566084		1.35925
	0.300772	0.0658097	2.93563		0.300772	0.0658097		1.3839
	0.280069	0.0497074	2.8962		0.280069	0.0497074		1.36845
	0.276783	0.0434637	2.85742		0.276783	0.0434637		1.38916
	0.269225	0.0240752	2.92019		0.269225	0.0240752		1.35399
	0.282698	0.0336051	2.86531		0.282698	0.0336051		1.38521
	0.265281	0.0411633	2.90178		0.265281	0.0411633		1.36057
	0.258709	0.0368913	2.86695		0.258709	0.0368913		1.39113
	0.306358	0.0109304	2.88634		0.306358	0.0109304		1.3793
	0.316874	0.0398489	2.90967		0.316874	0.0398489		1.36188
	0.285327	0.0316334	2.87648		0.285327	0.0316334		1.38324
	0.282369	0.0552939	2.90901		0.282369	0.0552939		1.34118
	0.310302	0.0306475	2.88765		0.310302	0.0306475		1.38587
	0.271854	0.036234	2.86761		0.271854	0.036234		1.35662
	0.280069	0.034591	2.85972		0.280069	0.034591		1.3678
	0.290913	0.0421492	2.89686		0.290913	0.0421492		1.36451
	0.278426	0.0667956	2.90901		0.278426	0.0667956		1.38883
	0.304058	0.0585801	2.8985		0.304058	0.0585801		1.35761
	0.267581	0.0464212	2.87977		0.267581	0.0464212		1.36451
	0.277111	0.0283472	2.87352		0.277111	0.0283472		1.35695
	0.303072	0.0572656	2.90803		0.303072	0.0572656		1.3747
	0.27974	0.0644952	2.90507		0.27974	0.0644952		1.36845
	0.281055	0.0756683	2.89127		0.281055	0.0756683		1.37437
	0.322132	0.0713962	2.85479		0.322132	0.0713962		1.40526
	0.2988	0.0267041	2.84756		0.2988	0.0267041		1.39211
	0.290913	0.0470785	2.87517		0.290913	0.0470785		1.37503
	0.286641	0.0612091	2.84395		0.286641	0.0612091		1.38521
	0.2988	0.0293331	2.9031		0.2988	0.0293331		1.38554
	0.290585	0.0398489	2.89291		0.290585	0.0398489		1.34348
	0.31556	0.0635094	2.89127		0.31556	0.0635094		1.36221
	0.311945	0.0539794	2.85841		0.311945	0.0539794		1.38324
	0.298472	0.0822406	2.88404		0.298472	0.0822406		1.37503
	0.300772	0.0382058	2.85709		0.300772	0.0382058		1.3839
	0.291571	0.0546367	2.8423		0.291571	0.0546367		1.3793
	0.28697	0.0260469	2.86005		0.28697	0.0260469		1.36911
	0.280726	0.0391916	2.84986		0.280726	0.0391916		1.34414
	0.291242	0.0227607	2.87484		0.291242	0.0227607		1.37535
	0.271196	0.0122449	2.83738		0.271196	0.0122449		1.4
	0.278426	0.0503646	2.85841		0.278426	0.0503646		1.36188
	0.251479	0.0543081	2.88207		0.251479	0.0543081		1.34052
	0.249179	0.0286758	2.87385		0.249179	0.0286758		1.39474
	0.32016	0.0460926	2.86268		0.32016	0.0460926		1.36188
	0.258052	0.0533222	2.85446		0.258052	0.0533222		1.36122
	0.241292	0.0543081	2.89258		0.241292	0.0543081		1.36155
	0.310302	0.0592373	2.86794		0.310302	0.0592373		1.3632
	0.301429	0.034591	2.90178		0.301429	0.034591		1.36188
	0.280069	0.0227607	2.84789		0.280069	0.0227607		1.3632
	0.32509	0.0267041	2.85644		0.32509	0.0267041		1.39803
	0.274482	0.0372199	2.84658		0.274482	0.0372199		1.37733
	0.262981	0.0270327	2.84953		0.262981	0.0270327		1.35268
	0.276783	0.0273613	2.8778		0.276783	0.0273613		1.3747
	0.288613	0.0191459	2.87319		0.288613	0.0191459		1.37437
	0.292556	0.0779686	2.8824		0.292556	0.0779686		1.3632
	0.31556	0.0648239	2.87122		0.31556	0.0648239		1.38127
	0.286313	0.0391916	2.84526		0.286313	0.0391916		1.37305
	0.316546	0.052665	2.86991		0.316546	0.052665		1.36977
	0.264295	0.045764	2.85479		0.264295	0.045764		1.37995
	0.288942	0.0224321	2.86334		0.288942	0.0224321		1.36582
	0.269225	0.02769	2.87254		0.269225	0.02769		1.34611
	0.287627	0.0240752	2.87878		0.287627	0.0240752		1.35038
	0.286313	0.0529936	2.86038		0.286313	0.0529936		1.38423
	0.279083	0.0322906	2.83277		0.279083	0.0322906		1.3724
	0.258052	0.0464212	2.88765		0.258052	0.0464212		1.39573
	0.272839	0.0592373	2.86399		0.272839	0.0592373		1.37404
	0.275797	0.0625235	2.85578		0.275797	0.0625235		1.35827
	0.285984	0.070739	2.86399		0.285984	0.070739		1.39146
	0.269553	0.0503646	2.84		0.269553	0.0503646		1.36155
	0.311288	0.0605518	2.82324		0.311288	0.0605518		1.35925
	0.295843	0.0674528	2.83935		0.295843	0.0674528		1.35629
	0.28467	0.0523364	2.88338		0.28467	0.0523364		1.36582
	0.287627	0.00534391	2.84066		0.287627	0.00534391		1.38521
	0.2965	0.0536508	2.83606		0.2965	0.0536508		1.39639
	0.299129	0.0523364	2.84658		0.299129	0.0523364		1.36287
	0.287299	0.0428064	2.83343		0.287299	0.0428064		1.36155
	0.267253	0.0336051	2.8377		0.267253	0.0336051		1.37404
	0.310959	0.0382058	2.84428		0.310959	0.0382058		1.38456
	0.295514	0.0608804	2.86498		0.295514	0.0608804		1.35991
	0.273168	0.0296617	2.83343		0.273168	0.0296617		1.35465
	0.290585	0.036234	2.84789		0.290585	0.036234		1.37338
	0.295185	0.0332765	2.86531		0.295185	0.0332765		1.3724
	0.250165	0.0428064	2.82259		0.250165	0.0428064		1.3816
	0.297157	0.0217748	2.84263		0.297157	0.0217748		1.3609
	0.291242	0.0217748	2.81864		0.291242	0.0217748		1.35728
	0.274811	0.036234	2.86005		0.274811	0.036234		1.34545
	0.293871	0.0253896	2.83639		0.293871	0.0253896		1.37108
	0.307673	0.025061	2.82949		0.307673	0.025061		1.38226
	0.287956	0.0428064	2.83475		0.287956	0.0428064		1.35367
	0.284012	0.0424778	2.84921		0.284012	0.0424778		1.39606
	0.271196	0.043135	2.79794		0.271196	0.043135		1.36221
	0.293871	0.0368913	2.8216		0.293871	0.0368913		1.35925
	0.286641	0.0648239	2.85709		0.286641	0.0648239		1.38291
	0.261009	0.0441209	2.81963		0.261009	0.0441209		1.37601
	0.273497	0.0493788	2.83277		0.273497	0.0493788		1.35925
	0.282041	0.0815834	2.8009		0.282041	0.0815834		1.38883
	0.259037	0.0552939	2.83738		0.259037	0.0552939		1.36122
	0.282041	0.0713962	2.78184		0.282041	0.0713962		1.37864
	0.287299	0.0424778	2.84428		0.287299	0.0424778		1.39146
	0.30833	0.0184886	2.82127		0.30833	0.0184886		1.39606
	0.314903	0.0460926	2.82587		0.314903	0.0460926		1.37667
	0.254108	0.0802689	2.85183		0.254108	0.0802689		1.35202
	0.318189	0.0658097	2.83738		0.318189	0.0658097		1.34676
	0.278097	0.01816	2.82785		0.278097	0.01816		1.38357
	0.299129	0.0493788	2.78414		0.299129	0.0493788		1.37831
	0.290585	0.0464212	2.8032		0.290585	0.0464212		1.37042
	0.287299	0.0575943	2.83409		0.287299	0.0575943		1.39836
	0.26561	0.0546367	2.83803		0.26561	0.0546367		1.35202
	0.310959	0.0447781	2.85052		0.310959	0.0447781		1.36385
	0.25838	0.0625235	2.85709		0.25838	0.0625235		1.37404
	0.305044	0.0168456	2.81766		0.305044	0.0168456		1.38061
	0.269882	0.0477357	2.82324		0.269882	0.0477357		1.39211
	0.268896	0.0441209	2.81864		0.268896	0.0441209		1.38587
	0.290256	0.0263755	2.81207		0.290256	0.0263755		1.35925
	0.27514	0.0618663	2.78611		0.27514	0.0618663		1.3655
	0.289599	0.045764	2.80221		0.289599	0.045764		1.36845
	0.300772	0.0421492	2.81897		0.300772	0.0421492		1.36977
	0.292885	0.0306475	2.80977		0.292885	0.0306475		1.37963
	0.26791	0.0467498	2.80123		0.26791	0.0467498		1.35991
	0.286641	0.0467498	2.83015		0.286641	0.0467498		1.36944
	0.287299	0.0204604	2.82653		0.287299	0.0204604		1.40132
	0.283684	0.0408347	2.81503		0.283684	0.0408347		1.38094
	0.273168	0.0391916	2.7802		0.273168	0.0391916		1.40164
	0.289599	0.0273613	2.81602		0.289599	0.0273613		1.36714
	0.280069	0.0221035	2.8055		0.280069	0.0221035		1.34184
	0.283684	0.0352482	2.80353		0.283684	0.0352482		1.36681
	0.300115	0.0332765	2.7963		0.300115	0.0332765		1.35892
	0.274811	0.0884844	2.78743		0.274811	0.0884844		1.36944
	0.276783	0.0615377	2.77362		0.276783	0.0615377		1.38751
	0.305701	0.043135	2.83869		0.305701	0.043135		1.38653
	0.320818	0.0368913	2.80517		0.320818	0.0368913		1.38817
	0.310302	0.0628522	2.80221		0.310302	0.0628522		1.35794
	0.313588	0.0447781	2.81109		0.313588	0.0447781		1.3931
	0.289928	0.0234179	2.81864		0.289928	0.0234179		1.34775
	0.286313	0.0395202	2.80451		0.286313	0.0395202		1.35597
	0.287299	0.0477357	2.77888		0.287299	0.0477357		1.37207
	0.297157	0.0385344	2.7848		0.297157	0.0385344		1.37273
	0.296171	0.0316334	2.78874		0.296171	0.0316334		1.39441
	0.26068	0.0221035	2.83146		0.26068	0.0221035		1.38883
	0.265281	0.038863	2.79728		0.265281	0.038863		1.377
	0.271525	0.0493788	2.78381		0.271525	0.0493788		1.34545
	0.300443	0.0658097	2.79597		0.300443	0.0658097		1.36122
	0.281712	0.0355768	2.80681		0.281712	0.0355768		1.36484
	0.284341	0.038863	2.77658		0.284341	0.038863		1.3839
	0.322461	0.036234	2.79728		0.322461	0.036234		1.36812
	0.291242	0.0336051	2.8147		0.291242	0.0336051		1.33428
	0.279412	0.0326192	2.79235		0.279412	0.0326192		1.40099
	0.294528	0.0296617	2.80484		0.294528	0.0296617		1.36977
	0.263967	0.0424778	2.77198		0.263967	0.0424778		1.36977
	0.24885	0.0635094	2.76278		0.24885	0.0635094		1.35761
	0.270868	0.0713962	2.78545		0.270868	0.0713962		1.36155
	0.276454	0.0579229	2.76377		0.276454	0.0579229		1.36057
	0.266267	0.0375485	2.79005		0.266267	0.0375485		1.38488
	0.282041	0.0506933	2.78414		0.282041	0.0506933		1.3885
	0.304058	0.0654811	2.78052		0.304058	0.0654811		1.3655
	0.303072	0.0612091	2.79728		0.303072	0.0612091		1.37831
	0.294528	0.0398489	2.7779		0.294528	0.0398489		1.36845
	0.290256	0.0329479	2.8032		0.290256	0.0329479		1.37207
	0.279412	0.0204604	2.79203		0.279412	0.0204604		1.38456
	0.310302	0.0454354	2.77231		0.310302	0.0454354		1.40854
	0.278755	0.0306475	2.77724		0.278755	0.0306475		1.4092
	0.281055	0.0270327	2.77034		0.281055	0.0270327		1.36615
	0.277769	0.0365627	2.72992		0.277769	0.0365627		1.36714
	0.297814	0.0391916	2.80057		0.297814	0.0391916		1.3793
	0.263309	0.0700818	2.80188		0.263309	0.0700818		1.37995
	0.292885	0.0556225	2.79301		0.292885	0.0556225		1.34775
	0.245893	0.0152025	2.7825		0.245893	0.0152025		1.34216
	0.298472	0.0441209	2.74503		0.298472	0.0441209		1.38028
	0.302086	0.0428064	2.78381		0.302086	0.0428064		1.35202
	0.312931	0.0608804	2.78644		0.312931	0.0608804		1.39704
	0.267253	0.0651525	2.76409		0.267253	0.0651525		1.3977
	0.251808	0.0467498	2.76837		0.251808	0.0467498		1.34052
	0.270539	0.0447781	2.76344		0.270539	0.0447781		1.3701
	0.265281	0.0230893	2.74273		0.265281	0.0230893		1.36057
	0.302086	0.0260469	2.75161		0.302086	0.0260469		1.35169
	0.323118	0.0579229	2.76409		0.323118	0.0579229		1.38258
	0.299457	0.0677814	2.74799		0.299457	0.0677814		1.37864
	0.280069	0.0690959	2.75456		0.280069	0.0690959		1.34315
	0.267581	0.0598946	2.78611		0.267581	0.0598946		1.37075
	0.293214	0.020789	2.7825		0.293214	0.020789		1.35958
	0.293542	0.0562798	2.77855		0.293542	0.0562798		1.35399
	0.276454	0.0618663	2.76738		0.276454	0.0618663		1.34709
	0.264624	0.0710676	2.73649		0.264624	0.0710676		1.37338
	0.257394	0.0480643	2.76015		0.257394	0.0480643		1.37733
	0.282041	0.0631808	2.77855		0.282041	0.0631808		1.36812
	0.286313	0.0211176	2.79893		0.286313	0.0211176		1.34644
	0.272182	0.050036	2.78118		0.272182	0.050036		1.37207
	0.280069	0.0454354	2.77198		0.280069	0.0454354		1.35367
	0.267581	0.0667956	2.7332		0.267581	0.0667956		1.35629
	0.298472	0.0575943	2.7871		0.298472	0.0575943		1.35334
	0.291571	0.043135	2.77067		0.291571	0.043135		1.37995
	0.293871	0.0483929	2.75161		0.293871	0.0483929		1.37207
	0.272839	0.0628522	2.75818		0.272839	0.0628522		1.38817
	0.292228	0.0506933	2.74405		0.292228	0.0506933		1.377
	0.275468	0.0382058	2.73813		0.275468	0.0382058		1.36484
	0.288613	0.0257183	2.76278		0.288613	0.0257183		1.35038
	0.27974	0.0214462	2.75292		0.27974	0.0214462		1.37437
	0.25838	0.0201317	2.76081		0.25838	0.0201317		1.39376
	0.257394	0.0405061	2.77198		0.257394	0.0405061		1.35629
	0.25838	0.0247324	2.76311		0.25838	0.0247324		1.37798
	0.288942	0.0460926	2.77067		0.288942	0.0460926		1.3632
	0.259037	0.0441209	2.76048		0.259037	0.0441209		1.35892
	0.284341	0.0506933	2.77724		0.284341	0.0506933		1.3793
	0.299129	0.050036	2.75785		0.299129	0.050036		1.34019
	0.279412	0.0621949	2.77494		0.279412	0.0621949		1.38653
	0.263638	0.0677814	2.77625		0.263638	0.0677814		1.36845
	0.271196	0.0644952	2.75358		0.271196	0.0644952		1.37273
	0.261338	0.059566	2.73353		0.261338	0.059566		1.3862
	0.279412	0.0575943	2.74306		0.279412	0.0575943		1.36747
	0.287299	0.0523364	2.76837		0.287299	0.0523364		1.37667
	0.255423	0.0483929	2.75193		0.255423	0.0483929		1.38127
	0.269882	0.0441209	2.76837		0.269882	0.0441209		1.37042
	0.250822	0.0411633	2.77757		0.250822	0.0411633		1.38554
	0.267581	0.0375485	2.75391		0.267581	0.0375485		1.38948
	0.2965	0.0444495	2.69936		0.2965	0.0444495		1.37798
	0.297486	0.0375485	2.72335		0.297486	0.0375485		1.38423
	0.287299	0.0237465	2.72433		0.287299	0.0237465		1.36352
	0.293214	0.0437923	2.75818		0.293214	0.0437923		1.43155
	0.28467	0.0447781	2.72433		0.28467	0.0447781		1.38324
	0.282041	0.0615377	2.7263		0.282041	0.0615377		1.38094
	0.275797	0.0674528	2.74766		0.275797	0.0674528		1.36385
	0.26561	0.0391916	2.75588		0.26561	0.0391916		1.36188
	0.242278	0.00534391	2.77067		0.242278	0.00534391		1.37075
	0.284998	0.0303189	2.7332		0.284998	0.0303189		1.39737
	0.264295	0.0460926	2.72433		0.264295	0.0460926		1.39869
	0.260023	0.0723821	2.76048		0.260023	0.0723821		1.36944
	0.270868	0.0299903	2.77067		0.270868	0.0299903		1.38817
	0.26068	0.0155311	2.74536		0.26068	0.0155311		1.38488
	0.272839	0.0612091	2.76902		0.272839	0.0612091		1.37831
	0.273825	0.0365627	2.75424		0.273825	0.0365627		1.35071
	0.253122	0.0391916	2.71447		0.253122	0.0391916		1.35597
	0.254765	0.0444495	2.72959		0.254765	0.0444495		1.36221
	0.278755	0.0339337	2.74175		0.278755	0.0339337		1.38488
	0.298472	0.0352482	2.73813		0.298472	0.0352482		1.35958
	0.267253	0.0454354	2.74306		0.267253	0.0454354		1.35235
	0.268567	0.0352482	2.73189		0.268567	0.0352482		1.36681
	0.275468	0.0184886	2.77329		0.275468	0.0184886		1.37733
	0.26068	0.0428064	2.73123		0.26068	0.0428064		1.37141
	0.276783	0.0523364	2.74405		0.276783	0.0523364		1.35005
	0.285327	0.0119163	2.73419		0.285327	0.0119163		1.38061
	0.262981	0.0273613	2.72367		0.262981	0.0273613		1.38324
	0.277769	0.0217748	2.71119		0.277769	0.0217748		1.3862
	0.266267	0.0152025	2.72335		0.266267	0.0152025		1.39409
	0.261009	0.0227607	2.76311		0.261009	0.0227607		1.37798
	0.27744	0.0434637	2.75391		0.27744	0.0434637		1.40526
	0.256408	0.0391916	2.72696		0.256408	0.0391916		1.37568
	0.276454	0.0480643	2.74733		0.276454	0.0480643		1.377
	0.269882	0.00501529	2.74503		0.269882	0.00501529		1.39474
	0.287956	0.0135594	2.72762		0.287956	0.0135594		1.38423
	0.2942	0.0671242	2.70429		0.2942	0.0671242		1.4069
	0.240963	0.0658097	2.72565		0.240963	0.0658097		1.3678
	0.290256	0.0487216	2.71644		0.290256	0.0487216		1.38423
	0.283355	0.0510219	2.7194		0.283355	0.0510219		1.37568
	0.296829	0.0720535	2.71743		0.296829	0.0720535		1.36747
	0.281055	0.0398489	2.73025		0.281055	0.0398489		1.38291
	0.282698	0.0263755	2.72269		0.282698	0.0263755		1.37404
	0.276783	0.0536508	2.71907		0.276783	0.0536508		1.3839
	0.287299	0.0441209	2.72269		0.287299	0.0441209		1.35104
	0.264953	0.0467498	2.76377		0.264953	0.0467498		1.38061
	0.273168	0.0490502	2.72236		0.273168	0.0490502		1.39211
	0.308002	0.0214462	2.71809		0.308002	0.0214462		1.39277
	0.264624	0.0497074	2.73616		0.264624	0.0497074		1.37437
	0.285984	0.0464212	2.70527		0.285984	0.0464212		1.36944
	0.269225	0.100643	2.7171		0.269225	0.100643		1.36254
	0.263967	0.0424778	2.73353		0.263967	0.0424778		1.3793
	0.242606	0.0411633	2.73386		0.242606	0.0411633		1.39113
	0.273497	0.0142166	2.68424		0.273497	0.0142166		1.39211
	0.252794	0.0240752	2.71809		0.252794	0.0240752		1.3724
	0.289928	0.0506933	2.67898		0.289928	0.0506933		1.3678
	0.266596	0.0589087	2.72762		0.266596	0.0589087		1.36911
	0.260023	0.0598946	2.71973		0.260023	0.0598946		1.3678
	0.287956	0.0493788	2.72072		0.287956	0.0493788		1.35958
	0.294528	0.0411633	2.71086		0.294528	0.0411633		1.37535
	0.286641	0.0447781	2.70001		0.286641	0.0447781		1.3885
	0.24885	0.0503646	2.72729		0.24885	0.0503646		1.36352
	0.279412	0.0529936	2.72663		0.279412	0.0529936		1.36517
	0.260023	0.0690959	2.70067		0.260023	0.0690959		1.39704
	0.285984	0.0625235	2.6849		0.285984	0.0625235		1.38751
	0.284012	0.0871699	2.74931		0.284012	0.0871699		1.37108
	0.308002	0.0474071	2.74865		0.308002	0.0474071		1.3724
	0.291571	0.0405061	2.70494		0.291571	0.0405061		1.3908
	0.260352	0.0405061	2.68851		0.260352	0.0405061		1.41577
	0.262324	0.0145452	2.71973		0.262324	0.0145452		1.38751
	0.285327	0.0490502	2.71776		0.285327	0.0490502		1.38916
	0.241621	0.0217748	2.6872		0.241621	0.0217748		1.33888
	0.26791	0.0759969	2.71973		0.26791	0.0759969		1.39014
	0.293871	0.06811	2.69213		0.293871	0.06811		1.37108
	0.217303	0.0296617	2.70264		0.217303	0.0296617		1.38094
	0.242935	0.0349196	2.72893		0.242935	0.0349196		1.36352
	0.264953	0.0368913	2.73156		0.264953	0.0368913		1.37371
	0.251479	0.0447781	2.68621		0.251479	0.0447781		1.35991
	0.258709	0.0631808	2.70724		0.258709	0.0631808		1.36451
	0.252794	0.0460926	2.69574		0.252794	0.0460926		1.40394
	0.275468	0.038863	2.67208		0.275468	0.038863		1.38127
	0.25838	0.0145452	2.68818		0.25838	0.0145452		1.35005
	0.266924	0.0211176	2.69771		0.266924	0.0211176		1.39901
	0.262652	0.0339337	2.68621		0.262652	0.0339337		1.40394
	0.272839	0.0523364	2.73649		0.272839	0.0523364		1.41742
	0.301101	0.0536508	2.70166		0.301101	0.0536508		1.41676
	0.270539	0.0720535	2.68851		0.270539	0.0720535		1.3701
	0.294857	0.0730393	2.7263		0.294857	0.0730393		1.38357
	0.254765	0.0615377	2.71874		0.254765	0.0615377		1.38751
	0.246221	0.034591	2.70823		0.246221	0.034591		1.40756
	0.254437	0.038863	2.70691		0.254437	0.038863		1.39146
	0.281712	0.0464212	2.68621		0.281712	0.0464212		1.37371
	0.253451	0.0224321	2.71546		0.253451	0.0224321		1.36484
	0.257066	0.0178314	2.70067		0.257066	0.0178314		1.37174
	0.283027	0.0293331	2.69311		0.283027	0.0293331		1.36451
	0.25608	0.059566	2.69607		0.25608	0.059566		1.39507
	0.264295	0.0464212	2.6757		0.264295	0.0464212		1.40296
	0.23932	0.0194745	2.7171		0.23932	0.0194745		1.36977
	0.273497	0.0497074	2.73189		0.273497	0.0497074		1.37733
	0.274154	0.0329479	2.70527		0.274154	0.0329479		1.33658
	0.267253	0.0559512	2.67602		0.267253	0.0559512		1.39211
	0.304715	0.0414919	2.66814		0.304715	0.0414919		1.40559
	0.262652	0.0572656	2.68523		0.262652	0.0572656		1.37338
	0.284012	0.0523364	2.71414		0.284012	0.0523364		1.38751
	0.275468	0.0497074	2.68917		0.275468	0.0497074		1.39671
	0.282041	0.0316334	2.69903		0.282041	0.0316334		1.40723
	0.248522	0.0802689	2.7309		0.248522	0.0802689		1.36878
	0.275797	0.0467498	2.70593		0.275797	0.0467498		1.39901
	0.285984	0.0661383	2.70133		0.285984	0.0661383		1.36977
	0.268567	0.0227607	2.67077		0.268567	0.0227607		1.36451
	0.297157	0.0368913	2.69837		0.297157	0.0368913		1.37207
	0.301429	0.0460926	2.68851		0.301429	0.0460926		1.38521
	0.284012	0.0378771	2.6826		0.284012	0.0378771		1.40394
	0.266596	0.0884844	2.71151		0.266596	0.0884844		1.38751
	0.261338	0.0391916	2.68687		0.261338	0.0391916		1.37963
	0.258709	0.0667956	2.68062		0.258709	0.0667956		1.38324
	0.268239	0.0359054	2.70691		0.268239	0.0359054		1.38357
	0.264295	0.0378771	2.68391		0.264295	0.0378771		1.37338
	0.27514	0.0375485	2.68884		0.27514	0.0375485		1.36812
	0.267253	0.0309762	2.67668		0.267253	0.0309762		1.37305
	0.236034	0.0322906	2.6803		0.236034	0.0322906		1.37568
	0.249836	0.0612091	2.66058		0.249836	0.0612091		1.38291
	0.263967	0.0365627	2.70494		0.263967	0.0365627		1.36221
	0.245564	0.0349196	2.69246		0.245564	0.0349196		1.39047
	0.259037	0.0247324	2.70198		0.259037	0.0247324		1.3839
	0.297486	0.0336051	2.67307		0.297486	0.0336051		1.4023
	0.276454	0.0447781	2.67602		0.276454	0.0447781		1.37174
	0.25378	0.0658097	2.67537		0.25378	0.0658097		1.39901
	0.275797	0.0230893	2.68851		0.275797	0.0230893		1.37634
	0.272182	0.0161883	2.67471		0.272182	0.0161883		1.38028
	0.278426	0.0454354	2.66617		0.278426	0.0454354		1.37995
	0.293871	0.0349196	2.65466		0.293871	0.0349196		1.39606
	0.28697	0.0773114	2.6987		0.28697	0.0773114		1.37141
	0.275468	0.0687673	2.67537		0.275468	0.0687673		1.39934
	0.264624	0.0273613	2.6734		0.264624	0.0273613		1.38916
	0.280726	0.0217748	2.65926		0.280726	0.0217748		1.37207
	0.287627	0.00863009	2.65434		0.287627	0.00863009		1.38193
	0.251151	0.0467498	2.66715		0.251151	0.0467498		1.37503
	0.278426	0.0336051	2.66978		0.278426	0.0336051		1.4207
	0.274154	0.0556225	2.64678		0.274154	0.0556225		1.41347
	0.26791	0.043135	2.67898		0.26791	0.043135		1.3954
	0.249836	0.0336051	2.69771		0.249836	0.0336051		1.37042
	0.260023	0.0342623	2.65861		0.260023	0.0342623		1.37995
	0.293214	0.0382058	2.70001		0.293214	0.0382058		1.37075
	0.289599	0.06811	2.68983		0.289599	0.06811		1.41052
	0.273168	0.0428064	2.66255		0.273168	0.0428064		1.38127
	0.265281	0.0125735	2.67471		0.265281	0.0125735		1.38061
	0.274482	0.0322906	2.67767		0.274482	0.0322906		1.41347
	0.276783	0.0313048	2.68818		0.276783	0.0313048		1.3839
	0.27744	0.0556225	2.66715		0.27744	0.0556225		1.36221
	0.28927	0.081912	2.63725		0.28927	0.081912		1.3816
	0.272511	0.0280186	2.66748		0.272511	0.0280186		1.36582
	0.24885	0.038863	2.67964		0.24885	0.038863		1.4023
	0.274154	0.0608804	2.64119		0.274154	0.0608804		1.39244
	0.27514	0.050036	2.68555		0.27514	0.050036		1.38653
	0.280398	0.0411633	2.66189		0.280398	0.0411633		1.38817
	0.300115	0.0480643	2.65762		0.300115	0.0480643		1.35662
	0.280069	0.0418206	2.66912		0.280069	0.0418206		1.39113
	0.269225	0.0296617	2.66682		0.269225	0.0296617		1.38423
	0.301429	0.052665	2.64875		0.301429	0.052665		1.3678
	0.257066	0.0152025	2.67241		0.257066	0.0152025		1.37634
	0.305701	0.0257183	2.68227		0.305701	0.0257183		1.35991
	0.280069	0.0395202	2.65828		0.280069	0.0395202		1.37995
	0.284341	0.0493788	2.68293		0.284341	0.0493788		1.37634
	0.264953	0.0520077	2.65006		0.264953	0.0520077		1.39901
	0.2988	0.0566084	2.66485		0.2988	0.0566084		1.37042
	0.27514	0.0641666	2.67537		0.27514	0.0641666		1.39704
	0.267253	0.0414919	2.66617		0.267253	0.0414919		1.4023
	0.269225	0.0483929	2.65631		0.269225	0.0483929		1.3839
	0.275468	0.0474071	2.65696		0.275468	0.0474071		1.32869
	0.277111	0.0447781	2.65664		0.277111	0.0447781		1.35531
	0.244907	0.0644952	2.67537		0.244907	0.0644952		1.36155
	0.274482	0.0398489	2.66124		0.274482	0.0398489		1.37798
	0.264953	0.0214462	2.61359		0.264953	0.0214462		1.37634
	0.262652	0.0543081	2.65138		0.262652	0.0543081		1.35695
	0.264624	0.045764	2.6379		0.264624	0.045764		1.39836
	0.284012	0.0365627	2.64283		0.284012	0.0365627		1.38488
	0.26561	0.0467498	2.63363		0.26561	0.0467498		1.37634
	0.293214	0.0579229	2.66222		0.293214	0.0579229		1.33526
	0.248522	0.0201317	2.66551		0.248522	0.0201317		1.39606
	0.266267	0.056937	2.66945		0.266267	0.056937		1.37995
	0.241621	0.0529936	2.66222		0.241621	0.0529936		1.38423
	0.282369	0.0421492	2.64152		0.282369	0.0421492		1.3793
	0.257394	0.0434637	2.62575		0.257394	0.0434637		1.39671
	0.269882	0.0401775	2.62213		0.269882	0.0401775		1.35761
	0.254108	0.031962	2.62936		0.254108	0.031962		1.3885
	0.259695	0.0214462	2.61326		0.259695	0.0214462		1.3839
	0.27514	0.0684387	2.69508		0.27514	0.0684387		1.38258
	0.233405	0.0490502	2.67602		0.233405	0.0490502		1.37207
	0.248193	0.0493788	2.6402		0.248193	0.0493788		1.39967
	0.278755	0.0165169	2.6356		0.278755	0.0165169		1.37864
	0.286313	0.0447781	2.64776		0.286313	0.0447781		1.39409
	0.279083	0.0240752	2.64645		0.279083	0.0240752		1.40986
	0.267253	0.0368913	2.61359		0.267253	0.0368913		1.39376
	0.26561	0.059566	2.63593		0.26561	0.059566		1.39639
	0.275797	0.0598946	2.66912		0.275797	0.0598946		1.39244
	0.259037	0.0536508	2.6218		0.259037	0.0536508		1.36615
	0.28467	0.0155311	2.65466		0.28467	0.0155311		1.40986
	0.250822	0.02769	2.64218		0.250822	0.02769		1.38554
	0.250493	0.0470785	2.65269		0.250493	0.0470785		1.37634
	0.28697	0.038863	2.62049		0.28697	0.038863		1.36122
	0.251479	0.0286758	2.6287		0.251479	0.0286758		1.39211
	0.268567	0.0306475	2.61786		0.268567	0.0306475		1.37108
	0.281712	0.0283472	2.63199		0.281712	0.0283472		1.37897
	0.249836	0.0332765	2.60274		0.249836	0.0332765		1.39737
	0.245564	0.0654811	2.62805		0.245564	0.0654811		1.3862
	0.247207	0.0109304	2.66485		0.247207	0.0109304		1.38948
	0.268567	0.0336051	2.62082		0.268567	0.0336051		1.40164
	0.273168	0.0299903	2.64546		0.273168	0.0299903		1.37601
	0.285984	0.0635094	2.64973		0.285984	0.0635094		1.3678
	0.291899	0.0365627	2.64842		0.291899	0.0365627		1.39376
	0.23702	0.0556225	2.63199		0.23702	0.0556225		1.41807
	0.251808	0.0562798	2.61293		0.251808	0.0562798		1.33953
	0.283355	0.043135	2.63265		0.283355	0.043135		1.39639
	0.268896	0.0483929	2.65039		0.268896	0.0483929		1.35991
	0.280726	0.0513505	2.65894		0.280726	0.0513505		1.38521
	0.265281	0.081912	2.60143		0.265281	0.081912		1.38521
	0.278755	0.0414919	2.64283		0.278755	0.0414919		1.38423
	0.246221	0.0322906	2.61063		0.246221	0.0322906		1.35662
	0.274154	0.0309762	2.631		0.274154	0.0309762		1.38686
	0.286641	0.0464212	2.61129		0.286641	0.0464212		1.40592
	0.278755	0.0152025	2.60537		0.278755	0.0152025		1.3655
	0.263967	0.043135	2.64809		0.263967	0.043135		1.37798
	0.257066	0.0375485	2.62969		0.257066	0.0375485		1.35367
	0.274811	0.0414919	2.61687		0.274811	0.0414919		1.38883
	0.272839	0.0615377	2.62115		0.272839	0.0615377		1.38817
	0.27744	0.0474071	2.64316		0.27744	0.0474071		1.36878
	0.27744	0.050036	2.61687		0.27744	0.050036		1.35301
	0.252794	0.0503646	2.61852		0.252794	0.0503646		1.38686
	0.288613	0.0382058	2.63133		0.288613	0.0382058		1.35334
	0.26791	0.0375485	2.60866		0.26791	0.0375485		1.36517
	0.280726	0.0480643	2.62115		0.280726	0.0480643		1.36582
	0.241949	0.0592373	2.63528		0.241949	0.0592373		1.35958
	0.241949	0.0368913	2.64743		0.241949	0.0368913		1.3632
	0.263638	0.0759969	2.60406		0.263638	0.0759969		1.37404
	0.263967	0.0943995	2.64612		0.263967	0.0943995		1.35859
	0.247207	0.0214462	2.61556		0.247207	0.0214462		1.38226
	0.253451	0.0293331	2.63528		0.253451	0.0293331		1.34742
	0.250165	0.0303189	2.64448		0.250165	0.0303189		1.35794
	0.266596	0.0605518	2.62082		0.266596	0.0605518		1.37765
	0.27744	0.0506933	2.60274		0.27744	0.0506933		1.38226
	0.221575	0.0467498	2.64119		0.221575	0.0467498		1.35761
	0.284341	0.0398489	2.61424		0.284341	0.0398489		1.37371
	0.271196	0.0395202	2.61983		0.271196	0.0395202		1.37535
	0.286313	0.0391916	2.62345		0.286313	0.0391916		1.37305
	0.279083	0.0536508	2.61326		0.279083	0.0536508		1.39671
	0.288284	0.0572656	2.65926		0.288284	0.0572656		1.38258
	0.262981	0.0477357	2.61129		0.262981	0.0477357		1.36615
	0.26068	0.0644952	2.62279		0.26068	0.0644952		1.36845
	0.253451	0.0470785	2.62903		0.253451	0.0470785		1.4046
	0.244907	0.0671242	2.63035		0.244907	0.0671242		1.38718
	0.235705	0.00370081	2.61129		0.235705	0.00370081		1.35597
	0.269225	0.0378771	2.65203		0.269225	0.0378771		1.4069
	0.249836	0.0684387	2.6126		0.249836	0.0684387		1.38784
	0.269553	0.0552939	2.585		0.269553	0.0552939		1.38423
	0.251808	0.0539794	2.62016		0.251808	0.0539794		1.36221
	0.225518	0.0520077	2.6149		0.225518	0.0520077		1.39803
	0.250165	0.0635094	2.59387		0.250165	0.0635094		1.39737
	0.278097	0.0585801	2.59683		0.278097	0.0585801		1.37995
	0.279412	0.0506933	2.59913		0.279412	0.0506933		1.39113
	0.25608	0.0418206	2.58927		0.25608	0.0418206		1.41347
	0.273825	0.0582515	2.59946		0.273825	0.0582515		1.39573
	0.253451	0.0674528	2.60833		0.253451	0.0674528		1.38094
	0.26068	0.0566084	2.61162		0.26068	0.0566084		1.35794
	0.278097	0.0621949	2.58664		0.278097	0.0621949		1.37798
	0.255751	0.0283472	2.62213		0.255751	0.0283472		1.3816
	0.248193	0.0273613	2.60044		0.248193	0.0273613		1.36648
	0.237349	0.0805975	2.61063		0.237349	0.0805975		1.3701
	0.251808	0.0447781	2.59978		0.251808	0.0447781		1.39409
	0.274482	0.0490502	2.60636		0.274482	0.0490502		1.40329
	0.278426	0.0628522	2.58565		0.278426	0.0628522		1.33329
	0.264295	0.02769	2.57218		0.264295	0.02769		1.37765
	0.272839	0.0352482	2.6011		0.272839	0.0352482		1.38324
	0.276454	0.0299903	2.55772		0.276454	0.0299903		1.3701
	0.255094	0.0720535	2.59946		0.255094	0.0720535		1.38784
	0.276126	0.0470785	2.60439		0.276126	0.0470785		1.3839
	0.282041	0.0451067	2.57547		0.282041	0.0451067		1.36648
	0.239978	0.0326192	2.56758		0.239978	0.0326192		1.36944
	0.258052	0.0234179	2.6149		0.258052	0.0234179		1.37371
	0.252465	0.0602232	2.60997		0.252465	0.0602232		1.37371
	0.25378	0.0368913	2.61654		0.25378	0.0368913		1.38258
	0.260023	0.0293331	2.6172		0.260023	0.0293331		1.37042
	0.242278	0.050036	2.58598		0.242278	0.050036		1.36911
	0.28697	0.0309762	2.62246		0.28697	0.0309762		1.37371
	0.271525	0.0309762	2.58894		0.271525	0.0309762		1.34939
	0.276783	0.0355768	2.56528		0.276783	0.0355768		1.35531
	0.259695	0.0533222	2.58368		0.259695	0.0533222		1.35564
	0.231762	0.0230893	2.6057		0.231762	0.0230893		1.37831
	0.25378	0.0562798	2.5896		0.25378	0.0562798		1.35859
	0.285327	0.0615377	2.63758		0.285327	0.0615377		1.36254
	0.298472	0.0543081	2.585		0.298472	0.0543081		1.37371
	0.239978	0.0556225	2.59913		0.239978	0.0556225		1.34874
	0.259695	0.0405061	2.58927		0.259695	0.0405061		1.35597
	0.260023	0.0418206	2.62213		0.260023	0.0418206		1.33395
	0.269225	0.0326192	2.59978		0.269225	0.0326192		1.39376
	0.264624	0.0490502	2.5827		0.264624	0.0490502		1.37667
	0.260023	0.0651525	2.58434		0.260023	0.0651525		1.32672
	0.23932	0.0572656	2.61063		0.23932	0.0572656		1.37667
	0.260023	0.0437923	2.60373		0.260023	0.0437923		1.38817
	0.253451	0.0562798	2.56889		0.253451	0.0562798		1.3701
	0.257723	0.0414919	2.59026		0.257723	0.0414919		1.36517
	0.274482	0.0309762	2.56561		0.274482	0.0309762		1.42432
	0.258052	0.0598946	2.58631		0.258052	0.0598946		1.36254
	0.278097	0.0464212	2.60767		0.278097	0.0464212		1.3977
	0.272182	0.0411633	2.59486		0.272182	0.0411633		1.35859
	0.244578	0.0214462	2.60471		0.244578	0.0214462		1.35695
	0.228476	0.0152025	2.57842		0.228476	0.0152025		1.3931
	0.273825	0.0359054	2.60701		0.273825	0.0359054		1.35564
	0.239978	0.0533222	2.56889		0.239978	0.0533222		1.40296
	0.265281	0.0520077	2.5804		0.265281	0.0520077		1.3747
	0.273825	0.0516791	2.54885		0.273825	0.0516791		1.39474
	0.286641	0.0631808	2.59781		0.286641	0.0631808		1.34578
	0.26791	0.0411633	2.57842		0.26791	0.0411633		1.3931
	0.250822	0.0280186	2.55444		0.250822	0.0280186		1.38784
	0.271196	0.036234	2.56331		0.271196	0.036234		1.36845
	0.265281	0.0365627	2.58073		0.265281	0.0365627		1.38817
	0.272182	0.0234179	2.58204		0.272182	0.0234179		1.37503
	0.280726	0.0644952	2.55575		0.280726	0.0644952		1.3701
	0.25608	0.0497074	2.55871		0.25608	0.0497074		1.38587
	0.245564	0.0365627	2.58073		0.245564	0.0365627		1.3908
	0.278755	0.063838	2.57218		0.278755	0.063838		1.38817
	0.269882	0.0618663	2.56035		0.269882	0.0618663		1.3609
	0.231105	0.0546367	2.58697		0.231105	0.0546367		1.377
	0.255423	0.0129021	2.60373		0.255423	0.0129021		1.35367
	0.283355	0.0437923	2.56561		0.283355	0.0437923		1.38521
	0.249179	0.0536508	2.59288		0.249179	0.0536508		1.3655
	0.257723	0.0727107	2.60143		0.257723	0.0727107		1.39737
	0.26068	0.070739	2.58204		0.26068	0.070739		1.36517
	0.245235	0.0355768	2.59683		0.245235	0.0355768		1.40329
	0.261995	0.0395202	2.6126		0.261995	0.0395202		1.38193
	0.246879	0.0313048	2.58401		0.246879	0.0313048		1.37897
	0.272839	0.0391916	2.59223		0.272839	0.0391916		1.38817
	0.25838	0.0539794	2.59584		0.25838	0.0539794		1.36615
	0.283684	0.0408347	2.59453		0.283684	0.0408347		1.37503
	0.288942	0.0359054	2.59617		0.288942	0.0359054		1.38521
	0.249836	0.0198031	2.60406		0.249836	0.0198031		1.38488
	0.249179	0.0352482	2.60471		0.249179	0.0352482		1.38226
	0.241292	0.0434637	2.60176		0.241292	0.0434637		1.35235
	0.250822	0.0618663	2.5735		0.250822	0.0618663		1.37207
	0.238663	0.0201317	2.58828		0.238663	0.0201317		1.35991
	0.253122	0.0513505	2.59617		0.253122	0.0513505		1.37535
	0.23932	0.0326192	2.59518		0.23932	0.0326192		1.37174
	0.260023	0.0493788	2.57645		0.260023	0.0493788		1.36418
	0.275797	0.0470785	2.56265		0.275797	0.0470785		1.38357
	0.250493	0.0615377	2.58303		0.250493	0.0615377		1.39376
	0.257066	0.050036	2.56298		0.257066	0.050036		1.42202
	0.241949	0.0428064	2.59124		0.241949	0.0428064		1.40559
	0.238006	0.0608804	2.55969		0.238006	0.0608804		1.39704
	0.264953	0.0641666	2.5873		0.264953	0.0641666		1.3724
	0.270539	0.0684387	2.62936		0.270539	0.0684387		1.37207
	0.269553	0.0533222	2.59551		0.269553	0.0533222		1.37141
	0.234062	0.0375485	2.56068		0.234062	0.0375485		1.39113
	0.258052	0.0628522	2.56134		0.258052	0.0628522		1.3954
	0.268896	0.0161883	2.58401		0.268896	0.0161883		1.37601
	0.273825	0.0552939	2.54129		0.273825	0.0552939		1.37963
	0.280069	0.0326192	2.58598		0.280069	0.0326192		1.40033
	0.26561	0.0447781	2.57251		0.26561	0.0447781		1.37733
	0.294528	0.0506933	2.5988		0.294528	0.0506933		1.39179
	0.255751	0.0372199	2.56364		0.255751	0.0372199		1.4092
	0.245564	0.0503646	2.56397		0.245564	0.0503646		1.34545
	0.241949	0.0562798	2.55641		0.241949	0.0562798		1.37765
	0.259366	0.0201317	2.58073		0.259366	0.0201317		1.34939
	0.238992	0.0437923	2.55444		0.238992	0.0437923		1.37273
	0.238334	0.0434637	2.58171		0.238334	0.0434637		1.38456
	0.254108	0.0789545	2.55871		0.254108	0.0789545		1.3816
	0.263638	0.0418206	2.57842		0.263638	0.0418206		1.39671
	0.246221	0.0188173	2.54523		0.246221	0.0188173		1.38061
	0.264624	0.0283472	2.54655		0.264624	0.0283472		1.39244
	0.242935	0.0621949	2.55345		0.242935	0.0621949		1.35432
	0.248522	0.075011	2.58565		0.248522	0.075011		1.38488
	0.242278	0.0339337	2.58007		0.242278	0.0339337		1.36287
	0.249836	0.0355768	2.55641		0.249836	0.0355768		1.40723
	0.254765	0.031962	2.52157		0.254765	0.031962		1.3954
	0.269882	0.0717248	2.55509		0.269882	0.0717248		1.37831
	0.272839	0.0444495	2.54753		0.272839	0.0444495		1.3931
	0.273168	0.052665	2.54655		0.273168	0.052665		1.37897
	0.257394	0.0460926	2.56725		0.257394	0.0460926		1.38916
	0.24655	0.0552939	2.56199		0.24655	0.0552939		1.38193
	0.276126	0.0598946	2.55608		0.276126	0.0598946		1.3862
	0.297486	0.0326192	2.56692		0.297486	0.0326192		1.38291
	0.271196	0.0690959	2.57678		0.271196	0.0690959		1.40624
	0.276783	0.0385344	2.55641		0.276783	0.0385344		1.42728
	0.266924	0.0497074	2.55772		0.266924	0.0497074		1.40723
	0.282698	0.0437923	2.53308		0.282698	0.0437923		1.34939
	0.24655	0.0543081	2.55674		0.24655	0.0543081		1.3609
	0.234391	0.0368913	2.56692		0.234391	0.0368913		1.37404
	0.268567	0.0677814	2.57678		0.268567	0.0677814		1.35925
	0.252794	0.0621949	2.54523		0.252794	0.0621949		1.39146
	0.263638	0.0493788	2.52815		0.263638	0.0493788		1.38324
	0.24655	0.0523364	2.56561		0.24655	0.0523364		1.38357
	0.243264	0.0615377	2.57678		0.243264	0.0615377		1.37601
	0.231762	0.036234	2.5827		0.231762	0.036234		1.35695
	0.264295	0.0411633	2.5357		0.264295	0.0411633		1.38094
	0.237677	0.02769	2.55148		0.237677	0.02769		1.36287
	0.264295	0.0447781	2.58303		0.264295	0.0447781		1.40756
	0.280726	0.0368913	2.55739		0.280726	0.0368913		1.37042
	0.232748	0.0414919	2.54425		0.232748	0.0414919		1.39113
	0.234391	0.0661383	2.54031		0.234391	0.0661383		1.39934
	0.260352	0.0470785	2.58073		0.260352	0.0470785		1.37995
	0.26068	0.0224321	2.54885		0.26068	0.0224321		1.36714
	0.260352	0.0428064	2.51697		0.260352	0.0428064		1.34611
	0.255423	0.0336051	2.56068		0.255423	0.0336051		1.3977
	0.238663	0.045764	2.55509		0.238663	0.045764		1.35399
	0.277111	0.0109304	2.56002		0.277111	0.0109304		1.36057
	0.264953	0.031962	2.53373		0.264953	0.031962		1.39441
	0.244578	0.0391916	2.54096		0.244578	0.0391916		1.40723
	0.280726	0.0299903	2.54326		0.280726	0.0299903		1.37831
	0.240306	0.0135594	2.53998		0.240306	0.0135594		1.39343
	0.260352	0.0487216	2.55279		0.260352	0.0487216		1.39113
	0.265938	0.0283472	2.54425		0.265938	0.0283472		1.36747
	0.28467	0.0408347	2.56134		0.28467	0.0408347		1.39671
	0.261009	0.0378771	2.53932		0.261009	0.0378771		1.37404
	0.266924	0.0342623	2.54359		0.266924	0.0342623		1.33198
	0.26561	0.0454354	2.52322		0.26561	0.0454354		1.41446
	0.253451	0.0497074	2.5219		0.253451	0.0497074		1.3701
	0.248522	0.0375485	2.52946		0.248522	0.0375485		1.3816
	0.276783	0.0608804	2.52716		0.276783	0.0608804		1.36057
	0.257394	0.0168456	2.53932		0.257394	0.0168456		1.3701
	0.250822	0.0441209	2.52683		0.250822	0.0441209		1.38883
	0.261009	0.0299903	2.55937		0.261009	0.0299903		1.33395
	0.269553	0.02769	2.55575		0.269553	0.02769		1.3632
	0.261995	0.0401775	2.56101		0.261995	0.0401775		1.37798
	0.269553	0.052665	2.55509		0.269553	0.052665		1.40526
	0.254108	0.0575943	2.53012		0.254108	0.0575943		1.37404
	0.268567	0.0759969	2.52847		0.268567	0.0759969		1.3931
	0.268567	0.031962	2.51796		0.268567	0.031962		1.37831
	0.275797	0.0411633	2.52059		0.275797	0.0411633		1.38916
	0.246879	0.0546367	2.54491		0.246879	0.0546367		1.38258
	0.261009	0.052665	2.52946		0.261009	0.052665		1.35794
	0.276126	0.0405061	2.51402		0.276126	0.0405061		1.35597
	0.271525	0.0349196	2.56988		0.271525	0.0349196		1.39507
	0.259695	0.0165169	2.57645		0.259695	0.0165169		1.37338
	0.280726	0.0447781	2.53275		0.280726	0.0447781		1.36287
	0.239649	0.0165169	2.53636		0.239649	0.0165169		1.39343
	0.266267	0.0322906	2.54293		0.266267	0.0322906		1.37897
	0.251479	0.0694245	2.52946		0.251479	0.0694245		1.37108
	0.253451	0.0497074	2.52059		0.253451	0.0497074		1.37437
	0.254108	0.0510219	2.51927		0.254108	0.0510219		1.36418
	0.235048	0.0704104	2.55772		0.235048	0.0704104		1.34414
	0.260023	0.0454354	2.53143		0.260023	0.0454354		1.36845
	0.234391	0.0434637	2.50481		0.234391	0.0434637		1.38028
	0.244907	0.0543081	2.52847		0.244907	0.0543081		1.40132
	0.244907	0.0516791	2.52322		0.244907	0.0516791		1.3954
	0.263309	0.0329479	2.54195		0.263309	0.0329479		1.37174
	0.235705	0.0224321	2.51303		0.235705	0.0224321		1.3977
	0.240963	0.043135	2.55214		0.240963	0.043135		1.37864
	0.238992	0.0556225	2.5035		0.238992	0.0556225		1.37831
	0.25838	0.0349196	2.51172		0.25838	0.0349196		1.37437
	0.251479	0.0704104	2.53176		0.251479	0.0704104		1.38061
	0.238663	0.0273613	2.52157		0.238663	0.0273613		1.3655
	0.215988	0.0572656	2.54491		0.215988	0.0572656		1.40427
	0.241949	0.0506933	2.54359		0.241949	0.0506933		1.38127
	0.249179	0.0612091	2.51533		0.249179	0.0612091		1.42169
	0.238334	0.00567252	2.53143		0.238334	0.00567252		1.34906
	0.269225	0.0444495	2.54523		0.269225	0.0444495		1.37765
	0.250493	0.0378771	2.53833		0.250493	0.0378771		1.35827
	0.238992	0.0329479	2.52716		0.238992	0.0329479		1.38193
	0.265281	0.0559512	2.52552		0.265281	0.0559512		1.36747
	0.259366	0.0230893	2.52322		0.259366	0.0230893		1.35662
	0.258709	0.0437923	2.51106		0.258709	0.0437923		1.39671
	0.261338	0.0612091	2.54852		0.261338	0.0612091		1.4046
	0.26791	0.0467498	2.54753		0.26791	0.0467498		1.40066
	0.26791	0.0326192	2.52355		0.26791	0.0326192		1.38718
	0.250165	0.0122449	2.50679		0.250165	0.0122449		1.37535
	0.246221	0.038863	2.50909		0.246221	0.038863		1.39573
	0.255094	0.0395202	2.50547		0.255094	0.0395202		1.37305
	0.233405	0.0424778	2.51204		0.233405	0.0424778		1.3839
	0.255751	0.0247324	2.5173		0.255751	0.0247324		1.36944
	0.249836	0.0506933	2.51829		0.249836	0.0506933		1.36418
	0.265281	0.0365627	2.51599		0.265281	0.0365627		1.36155
	0.256408	0.0454354	2.53078		0.256408	0.0454354		1.37174
	0.251151	0.00928733	2.54491		0.251151	0.00928733		1.39409
	0.258709	0.0513505	2.5288		0.258709	0.0513505		1.37601
	0.238334	0.0339337	2.53439		0.238334	0.0339337		1.38193
	0.265281	0.0464212	2.5288		0.265281	0.0464212		1.39047
	0.250493	0.0398489	2.5242		0.250493	0.0398489		1.38357
	0.249179	0.0240752	2.5196		0.249179	0.0240752		1.36385
	0.242606	0.0447781	2.52223		0.242606	0.0447781		1.39441
	0.227819	0.0464212	2.49036		0.227819	0.0464212		1.41052
	0.251479	0.0224321	2.51172		0.251479	0.0224321		1.39704
	0.277769	0.0158597	2.52716		0.277769	0.0158597		1.40362
	0.273168	0.0441209	2.51139		0.273168	0.0441209		1.37141
	0.272839	0.0273613	2.52486		0.272839	0.0273613		1.40756
	0.247864	0.0326192	2.55148		0.247864	0.0326192		1.37338
	0.27514	0.0700818	2.53078		0.27514	0.0700818		1.37535
	0.26561	0.038863	2.53636		0.26561	0.038863		1.38653
	0.256737	0.0336051	2.50974		0.256737	0.0336051		1.38751
	0.248522	0.0428064	2.52387		0.248522	0.0428064		1.3701
	0.24885	0.0214462	2.55345		0.24885	0.0214462		1.38028
	0.280726	0.0339337	2.5127		0.280726	0.0339337		1.39967
	0.26068	0.0677814	2.52913		0.26068	0.0677814		1.35531
	0.255751	0.063838	2.51533		0.255751	0.063838		1.37568
	0.24655	0.0825693	2.53242		0.24655	0.0825693		1.38258
	0.271525	0.0391916	2.52519		0.271525	0.0391916		1.41282
	0.243921	0.0539794	2.51829		0.243921	0.0539794		1.39343
	0.262652	0.070739	2.5058		0.262652	0.070739		1.39836
	0.277111	0.0480643	2.54491		0.277111	0.0480643		1.37963
	0.247864	0.0697531	2.48805		0.247864	0.0697531		1.35597
	0.25838	0.00567252	2.52847		0.25838	0.00567252		1.35169
	0.268239	0.0589087	2.49036		0.268239	0.0589087		1.40394
	0.238334	0.0556225	2.52387		0.238334	0.0556225		1.39014
	0.230776	0.0490502	2.48477		0.230776	0.0490502		1.39836
	0.235377	0.0375485	2.51632		0.235377	0.0375485		1.36484
	0.244907	0.0523364	2.54162		0.244907	0.0523364		1.38193
	0.255423	0.0559512	2.50679		0.255423	0.0559512		1.37995
	0.255094	0.0270327	2.51303		0.255094	0.0270327		1.40394
	0.276783	0.0391916	2.55345		0.276783	0.0391916		1.38587
	0.246879	0.0855268	2.51533		0.246879	0.0855268		1.3747
	0.267253	0.043135	2.50876		0.267253	0.043135		1.39113
	0.226504	0.070739	2.51434		0.226504	0.070739		1.40427
	0.235705	0.0408347	2.47392		0.235705	0.0408347		1.36977
	0.229462	0.0460926	2.53308		0.229462	0.0460926		1.35629
	0.256737	0.0815834	2.46374		0.256737	0.0815834		1.35564
	0.269882	0.0766541	2.49068		0.269882	0.0766541		1.37042
	0.240306	0.0296617	2.49036		0.240306	0.0296617		1.37338
	0.272511	0.0152025	2.50416		0.272511	0.0152025		1.37634
	0.232091	0.00632976	2.49528		0.232091	0.00632976		1.36714
	0.23472	0.0454354	2.50416		0.23472	0.0454354		1.37897
	0.242278	0.052665	2.51139		0.242278	0.052665		1.38226
	0.256408	0.0815834	2.49561		0.256408	0.0815834		1.36714
	0.233734	0.0506933	2.48214		0.233734	0.0506933		1.38226
	0.243921	0.0671242	2.53242		0.243921	0.0671242		1.38784
	0.260023	0.0441209	2.5219		0.260023	0.0441209		1.39901
	0.272511	0.0641666	2.51763		0.272511	0.0641666		1.35925
	0.256737	0.0270327	2.51894		0.256737	0.0270327		1.3954
	0.269553	0.0296617	2.49036		0.269553	0.0296617		1.35958
	0.235705	0.0759969	2.51829		0.235705	0.0759969		1.37305
	0.252465	0.0635094	2.47721		0.252465	0.0635094		1.3839
	0.251479	0.043135	2.47458		0.251479	0.043135		1.36845
	0.227161	0.0437923	2.48444		0.227161	0.0437923		1.37075
	0.249179	0.0575943	2.51664		0.249179	0.0575943		1.40197
	0.255751	0.0391916	2.50251		0.255751	0.0391916		1.38226
	0.245235	0.0713962	2.51599		0.245235	0.0713962		1.37733
	0.242606	0.0405061	2.5196		0.242606	0.0405061		1.38291
	0.24655	0.0227607	2.50646		0.24655	0.0227607		1.37897
	0.248522	0.0372199	2.515		0.248522	0.0372199		1.36221
	0.251479	0.0546367	2.50054		0.251479	0.0546367		1.35268
	0.231433	0.0480643	2.48444		0.231433	0.0480643		1.39146
	0.236691	0.034591	2.49068		0.236691	0.034591		1.34906
	0.259366	0.0414919	2.50284		0.259366	0.0414919		1.39211
	0.243592	0.0470785	2.4966		0.243592	0.0470785		1.38751
	0.200215	0.050036	2.48904		0.200215	0.050036		1.37765
	0.248522	0.0342623	2.4966		0.248522	0.0342623		1.39211
	0.250822	0.050036	2.47195		0.250822	0.050036		1.38751
	0.254437	0.0359054	2.46538		0.254437	0.0359054		1.35728
	0.233405	0.0658097	2.51862		0.233405	0.0658097		1.4046
	0.224204	0.0359054	2.48477		0.224204	0.0359054		1.40197
	0.240635	0.0579229	2.48641		0.240635	0.0579229		1.38258
	0.251151	0.0759969	2.49857		0.251151	0.0759969		1.35991
	0.263309	0.0437923	2.49496		0.263309	0.0437923		1.36681
	0.282369	0.0497074	2.4805		0.282369	0.0497074		1.377
	0.262652	0.0510219	2.47064		0.262652	0.0510219		1.36254
	0.237349	0.0467498	2.5012		0.237349	0.0467498		1.36812
	0.256737	0.0529936	2.48313		0.256737	0.0529936		1.38686
	0.279412	0.0441209	2.49233		0.279412	0.0441209		1.34906
	0.241949	0.0342623	2.48313		0.241949	0.0342623		1.3793
	0.273825	0.0605518	2.49003		0.273825	0.0605518		1.34709
	0.270868	0.02769	2.5012		0.270868	0.02769		1.37338
	0.249836	0.045764	2.47688		0.249836	0.045764		1.37634
	0.251479	0.0513505	2.46308		0.251479	0.0513505		1.36681
	0.268239	0.0342623	2.50087		0.268239	0.0342623		1.38883
	0.266596	0.0398489	2.48017		0.266596	0.0398489		1.3655
	0.27514	0.0523364	2.4851		0.27514	0.0523364		1.37798
	0.258052	0.0648239	2.48871		0.258052	0.0648239		1.36582
	0.226176	0.0694245	2.48345		0.226176	0.0694245		1.38587
	0.267253	0.0230893	2.50021		0.267253	0.0230893		1.36057
	0.214017	0.0503646	2.46209		0.214017	0.0503646		1.38061
	0.240635	0.0612091	2.4759		0.240635	0.0612091		1.39014
	0.214345	0.0585801	2.44041		0.214345	0.0585801		1.3862
	0.239649	0.0414919	2.45421		0.239649	0.0414919		1.36648
	0.218289	0.020789	2.49857		0.218289	0.020789		1.36385
	0.259366	0.0349196	2.46702		0.259366	0.0349196		1.38061
	0.256408	0.0713962	2.49364		0.256408	0.0713962		1.38193
	0.282369	0.0510219	2.46702		0.282369	0.0510219		1.37831
	0.235377	0.0414919	2.46571		0.235377	0.0414919		1.37667
	0.229133	0.0786258	2.469		0.229133	0.0786258		1.37733
	0.233077	0.0631808	2.46965		0.233077	0.0631808		1.38357
	0.258052	0.0720535	2.49463		0.258052	0.0720535		1.37535
	0.223547	0.0533222	2.49627		0.223547	0.0533222		1.38226
	0.238006	0.0385344	2.49627		0.238006	0.0385344		1.36878
	0.24885	0.0421492	2.492		0.24885	0.0421492		1.38521
	0.249179	0.0283472	2.4989		0.249179	0.0283472		1.35531
	0.209745	0.07764	2.49758		0.209745	0.07764		1.3977
	0.258709	0.0359054	2.47557		0.258709	0.0359054		1.42268
	0.228805	0.0618663	2.46275		0.228805	0.0618663		1.37404
	0.241621	0.056937	2.47885		0.241621	0.056937		1.37601
	0.249507	0.0375485	2.4759		0.249507	0.0375485		1.36484
	0.237349	0.0585801	2.53505		0.237349	0.0585801		1.36812
	0.244578	0.0336051	2.492		0.244578	0.0336051		1.33526
	0.235705	0.0352482	2.47097		0.235705	0.0352482		1.37601
	0.25838	0.0414919	2.47458		0.25838	0.0414919		1.35794
	0.23702	0.0497074	2.46045		0.23702	0.0497074		1.36878
	0.245235	0.0753397	2.48543		0.245235	0.0753397		1.37634
	0.263638	0.0605518	2.46965		0.263638	0.0605518		1.40493
	0.257394	0.0618663	2.46669		0.257394	0.0618663		1.36484
	0.205144	0.0437923	2.49101		0.205144	0.0437923		1.38456
	0.249179	0.0713962	2.4782		0.249179	0.0713962		1.35531
	0.245564	0.0648239	2.50383		0.245564	0.0648239		1.3862
	0.262981	0.0648239	2.45224		0.262981	0.0648239		1.36911
[truncated: 2,008 more rows]
