# Supplementary material for: Simultaneous recording of multiple cellular signaling events by frequency- and spectrally-tuned multiplexing of fluorescent probes
Source: eLife. 2021 Dec 3;10:e63129. doi: 10.7554/eLife.63129 (PMC8700268; doi:10.7554/eLife.63129)
Supplement: Figure 9—figure supplement 1—source data 1. [file elife-63129-fig9-figsupp1-data1.xlsx]

## Sheet: 9C & Supp03
	Fura-2, ex: 340				Fura-2, ex: 370				Fluo-4				Calbryte 630
linear fitting results			Fluo-4 channel	Calbryte 630 channel			Fluo-4 channel	Calbryte 630 channel	Fura-2 channel ex: 340	Fura-2 channel ex: 370		Calbryte 630 channel	Fura-2 channel ex: 340	Fura-2 channel ex: 370	Fluo-4 channel
slope			-0.006012	-0.002371			0.003054	0.001386	0.009509	0.01103		0.001039	0.0004551	-0.000248	0.001509
y-intercent			0.1169	0.03176			0.06996	0.01192	0.01661	0.03072		0.008113	0.01168	0.02372	0.04989
	Fluorescence				Fluorescence				Fluorescence
	Fura-2 channel ex: 340	Fura-2 channel ex: 370	Fluo-4 channel	Calbryte 630 channel	Fura-2 channel ex: 340	Fura-2 channel ex: 370	Fluo-4 channel	Calbryte 630 channel	Fura-2 channel ex: 340	Fura-2 channel ex: 370	Fluo-4 channel	Calbryte 630 channel	Fura-2 channel ex: 340	Fura-2 channel ex: 370	Fluo-4 channel	Calbryte 630 channel
trace_01	5.58		0.052665	0.00928733		3.94251	0.052665	0.00928733	0.0257183	0.0454354	4.11931	0.0224321	0.0106018	0.0135594	0.0582515	4.54618
	5.58493		0.0428064	0.00928733		3.98425	0.0428064	0.00928733	0.0313048	0.0805975	4.09335	0.0191459	0.00830147	0.0152025	0.0615377	4.52351
	5.62568		0.0296617	0.00797285		4.02105	0.0296617	0.00797285	0.0513505	0.0953854	4.04373	0.0152025	0.0142166	0.0135594	0.0615377	4.50708
	5.63061		0.0474071	0.00928733		4.07593	0.0474071	0.00928733	0.056937	0.0861841	3.99969	0.0142166	0.0201317	0.0102732	0.0598946	4.47356
	5.67727		0.0529936	0.0132308		4.13147	0.0529936	0.0132308	0.0444495	0.0740252	3.94547	0.00928733	0.02769	0.0102732	0.0582515	4.4545
	5.72492		0.0546367	0.0145452		4.14067	0.0546367	0.0145452	0.0503646	0.084541	3.88106	0.00567252	0.0299903	0.0148738	0.0572656	4.43182
	5.7637		0.0175028	0.00731562		4.15316	0.0175028	0.00731562	0.0414919	0.0904561	3.78018	0.00304358	0.0253896	0.0188173	0.0579229	4.39436
	5.84717		0.0122449	0.00797285		4.19489	0.0122449	0.00797285	0.0398489	0.100315	3.67469	0.00304358	0.0211176	0.0227607	0.0612091	4.30958
	5.95791		0.0414919	0.0161883		4.2524	0.0414919	0.0161883	0.0677814	0.0855268	3.62606	0.00337219	0.0178314	0.0260469	0.0631808	4.27409
	6.02725		0.0520077	0.0168456		4.33554	0.0520077	0.0168456	0.0733679	0.0674528	3.57118	0.00468667	0.0152025	0.0253896	0.0598946	4.23071
	6.05025		0.0260469	0.0122449		4.39995	0.0260469	0.0122449	0.0523364	0.0589087	3.49099	0.00928733	0.0135594	0.0247324	0.0543081	4.18405
	6.04729		0.0352482	0.00435805		4.48637	0.0352482	0.00435805	0.0490502	0.0628522	3.42133	0.0125735	0.0125735	0.0227607	0.0529936	4.09401
	6.09659		0.107216	0.00501529		4.5843	0.107216	0.00501529	0.045764	0.0911133	3.34476	0.0142166	0.00961595	0.0227607	0.0516791	4.04373
	6.11827		0.110502	0.00731562		4.63589	0.110502	0.00731562	0.0280186	0.110173	3.27345	0.0125735	0.006987	0.0237465	0.0490502	3.98918
	6.1025		0.116417	0.00797285		4.64871	0.116417	0.00797285	0.0165169	0.112145	3.17552	0.00928733	0.00797285	0.02769	0.0490502	3.91754
	6.08541		0.107544	0.00501529		4.64674	0.107544	0.00501529	0.0155311	0.0924278	3.08942	0.00731562	0.00961595	0.0267041	0.0497074	3.77426
	6.05945		0.103272	0.00830147		4.66416	0.103272	0.00830147	0.0171742	0.063838	3.02337	0.00534391	0.00895871	0.025061	0.0480643	3.7023
	5.99011		0.101301	0.00731562		4.7634	0.101301	0.00731562	0.0290044	0.0414919	2.92906	0.00501529	0.0109304	0.0224321	0.0477357	3.65333
	5.94739		0.120032	0.00764424		4.87217	0.120032	0.00764424	0.0539794	0.045764	2.80583	0.006987	0.0158597	0.0204604	0.0483929	3.61094
	5.84684		0.149607	0.0230893		4.94183	0.149607	0.0230893	0.0559512	0.0556225	2.69377	0.0106018	0.0175028	0.0230893	0.0493788	3.54094
	5.72624		0.13942	0.0316334		5.01742	0.13942	0.0316334	0.0651525	0.0552939	2.58368	0.0122449	0.0161883	0.0191459	0.0523364	3.48377
	5.58789		0.101301	0.0326192		5.13375	0.101301	0.0326192	0.0720535	0.0447781	2.5035	0.011259	0.0145452	0.0184886	0.0490502	3.42461
	5.41471		0.0815834	0.0313048		5.186	0.0815834	0.0313048	0.0753397	0.0355768	2.43022	0.00961595	0.0135594	0.0184886	0.045764	3.35922
	5.3135		0.0667956	0.0178314		5.26585	0.0667956	0.0178314	0.088813	0.0424778	2.31882	0.0135594	0.0142166	0.0214462	0.0490502	3.26491
	5.21623		0.063838	0.00764424		5.37232	0.063838	0.00764424	0.0805975	0.0602232	2.19526	0.0165169	0.0155311	0.0227607	0.0513505	3.18735
	5.09727		0.0891416	0.00994457		5.47353	0.0891416	0.00994457	0.0631808	0.0759969	2.08451	0.0194745	0.0145452	0.0227607	0.0536508	3.13675
	4.97568		0.0296617	0.0204604		5.57606	0.0296617	0.0204604	0.0529936	0.0871699	1.97935	0.0191459	0.0145452	0.0244038	0.0572656	3.08647
	4.92343		0.0674528	0.0372199		5.65624	0.0674528	0.0372199	0.0464212	0.0861841	1.88307	0.0171742	0.0165169	0.0267041	0.0615377	3.01976
	4.86461		0.084541	0.0391916		5.75121	0.084541	0.0391916	0.0414919	0.0950568	1.82129	0.0158597	0.0175028	0.0293331	0.0628522	2.92216
	4.82748		0.0763255	0.0293331		5.80839	0.0763255	0.0293331	0.0234179	0.107544	1.74604	0.0171742	0.01816	0.0273613	0.0602232	2.86925
	4.78706		0.0385344	0.0230893		5.82351	0.0385344	0.0230893	0.0184886	0.108202	1.68261	0.0171742	0.0155311	0.0214462	0.0575943	2.80846
	4.72659		0.0687673	0.0234179		5.8728	0.0687673	0.0234179	0.0155311	0.0973571	1.62543	0.0155311	0.0122449	0.0204604	0.056937	2.75161
	4.66777		0.13942	0.0106018		5.90698	0.13942	0.0106018	0.0224321	0.0930851	1.56562	0.0152025	0.0132308	0.0204604	0.0575943	2.64645
	4.66678		0.140735	0.00370081		5.92538	0.140735	0.00370081	0.0227607	0.0773114	1.50089	0.0171742	0.0135594	0.0184886	0.0556225	2.59026
	4.71509		0.114774	0.00797285		5.97598	0.114774	0.00797285	0.0230893	0.0464212	1.43976	0.0171742	0.0178314	0.0184886	0.0510219	2.54228
	4.70457		0.070739	0.0119163		5.98288	0.070739	0.0119163	0.02769	0.0296617	1.39639	0.013888	0.0221035	0.0184886	0.0503646	2.51237
	4.61289		0.0740252	0.0155311		6.0187	0.0740252	0.0155311	0.0316334	0.0313048	1.3701	0.0106018	0.020789	0.0227607	0.0474071	2.47491
	4.52219		0.131205	0.0145452		6.03809	0.131205	0.0145452	0.0428064	0.036234	1.36287	0.00271496	0.0217748	0.0257183	0.0464212	2.44041
	4.47619		0.162752	0.0171742		6.07818	0.162752	0.0171742	0.0474071	0.031962	1.34151	0.00567252	0.0211176	0.0237465	0.0487216	2.39604
	4.44957		0.0937423	0.0257183		6.14325	0.0937423	0.0257183	0.0391916	0.0290044	1.31127	0.0102732	0.0125735	0.0211176	0.0523364	2.34741
	4.48342		0.0907847	0.0293331		6.18827	0.0907847	0.0293331	0.0322906	0.0313048	1.26362	0.0119163	0.00994457	0.0165169	0.0549653	2.26755
	4.51529		0.11083	0.0240752		6.2185	0.11083	0.0240752	0.0401775	0.0382058	1.21105	0.0155311	0.0122449	0.0158597	0.0608804	2.23633
	4.48802		0.113459	0.0168456		6.24512	0.113459	0.0168456	0.0322906	0.043135	1.1611	0.0125735	0.0122449	0.020789	0.0631808	2.20446
	4.47323		0.0851982	0.011259		6.26648	0.0851982	0.011259	0.0175028	0.0467498	1.11739	0.0109304	0.00895871	0.0244038	0.0605518	2.16864
	4.45154		0.0536508	0.0165169		6.27272	0.0536508	0.0165169	0.0168456	0.0421492	1.07434	0.00830147	0.0102732	0.0257183	0.0608804	2.10291
	4.44694		0.13482	0.0204604		6.28159	0.13482	0.0204604	0.0115877	0.0401775	1.02768	0.00797285	0.0109304	0.0240752	0.0602232	2.06414
	4.47586		0.140078	0.0263755		6.36703	0.140078	0.0263755	0.00304358	0.0536508	0.98627	0.006987	0.00928733	0.0227607	0.0539794	2.02766
	4.44102		0.152894	0.0273613		6.47909	0.152894	0.0273613	0.0152025	0.059566	0.948479	0.00764424	0.00961595	0.0224321	0.0536508	1.99677
	4.3661		0.195614	0.0237465		6.5596	0.195614	0.0237465	0.0132308	0.0618663	0.932377	0.00863009	0.0155311	0.0211176	0.0533222	1.94781
	4.28789		0.174911	0.020789		6.62105	0.174911	0.020789	0.00961595	0.0490502	0.926462	0.011259	0.0191459	0.020789	0.0520077	1.92217
	4.26719		0.160452	0.0217748		6.65818	0.160452	0.0217748	0.0201317	0.0437923	0.921532	0.0135594	0.0191459	0.0253896	0.052665	1.89917
	4.28756		0.151579	0.0240752		6.67527	0.151579	0.0240752	0.0148738	0.0579229	0.904115	0.0161883	0.0194745	0.0273613	0.0503646	1.87387
	4.27737		0.155523	0.0352482		6.6319	0.155523	0.0352482	0.00830147	0.063838	0.884398	0.01816	0.0152025	0.0283472	0.0543081	1.82162
	4.23005		0.179183	0.0316334		6.63748	0.179183	0.0316334	0.0188173	0.0585801	0.867639	0.0161883	0.011259	0.0273613	0.0566084	1.78185
	4.23137		0.11083	0.0270327		6.67363	0.11083	0.0270327	0.0201317	0.0579229	0.850551	0.0155311	0.00928733	0.0280186	0.0612091	1.75524
	4.27474		0.043135	0.025061		6.68119	0.043135	0.025061	0.011259	0.0608804	0.827547	0.0148738	0.00764424	0.0296617	0.0648239	1.73355
	4.28493		0.0296617	0.0316334		6.74297	0.0296617	0.0316334	0.00402943	0.056937	0.811445	0.0148738	0.00632976	0.0280186	0.0602232	1.70332
	4.31089		0.050036	0.0283472		6.80179	0.050036	0.0283472	0.0106018	0.0549653	0.800601	0.0168456	0.00797285	0.0286758	0.0572656	1.67341
	4.32404		0.0556225	0.0201317		6.84484	0.0556225	0.0201317	0.0234179	0.0529936	0.782198	0.0142166	0.00961595	0.0267041	0.0559512	1.65074
	4.30399		0.0556225	0.0145452		6.86554	0.0556225	0.0145452	0.0237465	0.0539794	0.756566	0.0132308	0.0109304	0.0253896	0.0562798	1.62675
	4.26522		0.0769827	0.0115877		6.85272	0.0769827	0.0115877	0.0283472	0.0454354	0.727647	0.0132308	0.00665838	0.0240752	0.059566	1.59553
	4.21789		0.131862	0.00797285		6.87277	0.131862	0.00797285	0.02769	0.0391916	0.709902	0.0132308	0.00665838	0.0263755	0.0589087	1.55774
	4.21757		0.169325	0.00370081		6.95854	0.169325	0.00370081	0.0260469	0.0421492	0.6961	0.0125735	0.00863009	0.0260469	0.0549653	1.54229
	4.19062		0.176554	0.0171742		6.96807	0.176554	0.0171742	0.0165169	0.0506933	0.673097	0.0102732	0.0115877	0.0224321	0.0523364	1.5229
	4.17123		0.199557	0.0280186		6.96741	0.199557	0.0280186	0.00961595	0.0516791	0.642535	0.00797285	0.00895871	0.0184886	0.0513505	1.49596
	4.17747		0.147964	0.0359054		6.99633	0.147964	0.0359054	0.0109304	0.0474071	0.626433	0.00895871	0.00731562	0.0201317	0.0503646	1.44995
	4.19916		0.0878272	0.0267041		7.03017	0.0878272	0.0267041	0.0135594	0.0375485	0.626104	0.0122449	0.00830147	0.0234179	0.0480643	1.43451
	4.1732		0.0891416	0.0204604		7.06764	0.0891416	0.0204604	0.013888	0.031962	0.627747	0.0122449	0.00830147	0.025061	0.0454354	1.40822
	4.11372		0.11576	0.0283472		7.08768	0.11576	0.0283472	0.00797285	0.0398489	0.613617	0.0119163	0.0106018	0.0240752	0.0467498	1.38226
	4.06312		0.152894	0.0372199		7.11824	0.152894	0.0372199	0.0211176	0.0421492	0.591928	0.0109304	0.0148738	0.0240752	0.050036	1.33493
	3.99969		0.104258	0.0293331		7.18035	0.104258	0.0293331	0.0244038	0.0405061	0.582069	0.0135594	0.0152025	0.0237465	0.0546367	1.3139
	3.99378		0.070739	0.0188173		7.21551	0.070739	0.0188173	0.0283472	0.0414919	0.56761	0.00797285	0.0135594	0.0267041	0.0559512	1.29714
	4.01021		0.0907847	0.0155311		7.20598	0.0907847	0.0155311	0.0313048	0.0451067	0.552822	0.00632976	0.0129021	0.02769	0.0510219	1.28367
	3.96979		0.102286	0.0290044		7.19645	0.102286	0.0290044	0.0293331	0.0411633	0.54395	0.00632976	0.0161883	0.0253896	0.0467498	1.24949
	3.92477		0.150593	0.0365627		7.17739	0.150593	0.0365627	0.0247324	0.0296617	0.545593	0.006987	0.0184886	0.02769	0.045764	1.22978
	3.85346		0.164067	0.0428064		7.21682	0.164067	0.0428064	0.0237465	0.0290044	0.536391	0.00501529	0.0175028	0.0293331	0.0447781	1.21203
	3.81665		0.120689	0.043135		7.24903	0.120689	0.043135	0.0306475	0.0336051	0.518317	0.00337219	0.0129021	0.0260469	0.0460926	1.19593
	3.82553		0.0805975	0.0194745		7.26579	0.0805975	0.0194745	0.036234	0.036234	0.499915	0.00370081	0.00994457	0.0194745	0.0460926	1.1611
	3.84294		0.0592373	0.00994457		7.31377	0.0592373	0.00994457	0.034591	0.036234	0.478555	0.00370081	0.00928733	0.01816	0.0470785	1.14302
	3.93397		0.0612091	0.00928733		7.37127	0.0612091	0.00928733	0.0332765	0.031962	0.460152	0.00140048	0.00863009	0.0178314	0.0477357	1.13021
	3.95172		0.0993288	0.0263755		7.37982	0.0993288	0.0263755	0.0293331	0.0283472	0.456537	0.00337219	0.00764424	0.0165169	0.0444495	1.12199
	3.91984		0.0963712	0.0286758		7.38376	0.0963712	0.0286758	0.0283472	0.0240752	0.46311	0.00665838	0.00863009	0.0125735	0.0405061	1.10687
	3.89782		0.0950568	0.0283472		7.38277	0.0950568	0.0283472	0.020789	0.0244038	0.466067	0.00895871	0.0106018	0.0168456	0.0414919	1.098
	3.84623		0.11083	0.0253896		7.37193	0.11083	0.0253896	0.0142166	0.0293331	0.46311	0.00567252	0.00895871	0.0290044	0.0460926	1.08486
	3.85083		0.112802	0.0184886		7.42648	0.112802	0.0184886	0.0145452	0.0280186	0.462781	0.00140048	0.00797285	0.0359054	0.0546367	1.06185
	3.88303		0.095714	0.0201317		7.45014	0.095714	0.0201317	0.0247324	0.036234	0.452594	0.00402943	0.00895871	0.0375485	0.0582515	1.01092
	3.85083		0.0842124	0.0247324		7.45375	0.0842124	0.0247324	0.02769	0.0474071	0.443721	0.00567252	0.0148738	0.0365627	0.0549653	0.984298
	3.83046		0.0822406	0.0237465		7.45737	0.0822406	0.0237465	0.0349196	0.0513505	0.443392	0.00994457	0.0155311	0.0299903	0.0516791	0.969839
	3.80219		0.0474071	0.0175028		7.47708	0.0474071	0.0175028	0.0424778	0.0454354	0.443721	0.00994457	0.0142166	0.0260469	0.0513505	0.961295
	3.77065		0.0759969	0.0155311		7.55004	0.0759969	0.0155311	0.0378771	0.0375485	0.438135	0.00830147	0.0148738	0.0237465	0.0483929	0.946179
	3.7506		0.0237465	0.0257183		7.59999	0.0237465	0.0257183	0.0355768	0.034591	0.430248	0.00928733	0.0129021	0.0204604	0.0470785	0.93862
	3.73877		0.111488	0.0398489		7.6289	0.111488	0.0398489	0.0372199	0.0375485	0.421046	0.00961595	0.00994457	0.01816	0.0483929	0.936649
	3.74797		0.116417	0.0506933		7.68641	0.116417	0.0506933	0.0434637	0.0355768	0.408887	0.00895871	0.00895871	0.013888	0.0447781	0.930405
	3.7552		0.101301	0.0516791		7.71927	0.101301	0.0516791	0.0316334	0.0359054	0.405273	0.00797285	0.011259	0.0135594	0.0401775	0.913974
	3.7253		0.100315	0.0414919		7.75575	0.100315	0.0414919	0.0161883	0.0408347	0.400015	0.00961595	0.0135594	0.0198031	0.0460926	0.888013
	3.69671		0.0529936	0.0313048		7.7495	0.0529936	0.0313048	0.00764424	0.0401775	0.400672	0.00830147	0.0119163	0.0267041	0.0493788	0.877497
	3.67633		0.01816	0.0184886		7.73176	0.01816	0.0184886	0.00731562	0.0352482	0.401986	0.006987	0.0115877	0.0322906	0.0497074	0.870925
	3.69967		0.0158597	0.0109304		7.7403	0.0158597	0.0109304	0.00468667	0.0326192	0.3987	0.00731562	0.0125735	0.0306475	0.0503646	0.859095
	3.73811		0.0575943	0.0165169		7.73373	0.0575943	0.0165169	0.00271496	0.0299903	0.385884	0.00928733	0.011259	0.0280186	0.0533222	0.834448
	3.77821		0.0477357	0.0165169		7.74786	0.0477357	0.0165169	0.00895871	0.0309762	0.376026	0.0102732	0.00863009	0.0280186	0.0572656	0.823604
	3.75717		0.0513505	0.025061		7.75312	0.0513505	0.025061	0.0217748	0.025061	0.372411	0.00435805	0.00797285	0.0283472	0.0556225	0.81276
	3.73154		0.0858554	0.0329479		7.77021	0.0858554	0.0329479	0.0336051	0.0142166	0.37011	0.00238634	0.006987	0.0263755	0.0533222	0.803887
	3.71018		0.0516791	0.0253896		7.81522	0.0516791	0.0253896	0.0408347	0.0145452	0.362224	0.00238634	0.00665838	0.0263755	0.0493788	0.775626
	3.69277		0.0894703	0.0184886		7.83034	0.0894703	0.0184886	0.0460926	0.0263755	0.367482	0.00304358	0.00863009	0.0283472	0.0470785	0.759852
	3.70065		0.100643	0.0188173		7.81062	0.100643	0.0188173	0.0395202	0.0244038	0.376354	0.00304358	0.00567252	0.0286758	0.0460926	0.750979
	3.67896		0.0648239	0.0273613		7.78894	0.0648239	0.0273613	0.0329479	0.0191459	0.372411	0.00567252	0.00402943	0.0329479	0.0467498	0.74605
	3.61883		0.059566	0.0296617		7.80997	0.059566	0.0296617	0.0280186	0.0280186	0.367153	0.00731562	0.00402943	0.0332765	0.0510219	0.739149
	3.57052		0.0539794	0.0221035		7.8517	0.0539794	0.0221035	0.0227607	0.0355768	0.364195	0.00928733	0.00205772	0.0322906	0.0543081	0.734548
	3.57644		0.0786258	0.0122449		7.90658	0.0786258	0.0122449	0.0240752	0.0339337	0.362552	0.00863009	0.00435805	0.0293331	0.0549653	0.726662
	3.61521		0.0786258	0.00468667		7.98446	0.0786258	0.00468667	0.0221035	0.0273613	0.356966	0.00797285	0.00632976	0.0253896	0.0552939	0.720746
	3.65333		0.0460926	0.0158597		8.01239	0.0460926	0.0158597	0.0198031	0.0293331	0.350065	0.00994457	0.00764424	0.0204604	0.0566084	0.702344
	3.64183		0.0267041	0.0253896		7.97953	0.0267041	0.0253896	0.0217748	0.0309762	0.350393	0.013888	0.00994457	0.0152025	0.0552939	0.685584
	3.65202		0.0552939	0.0332765		7.9585	0.0552939	0.0332765	0.0171742	0.0273613	0.341521	0.0155311	0.0132308	0.0129021	0.0523364	0.669482
	3.64413		0.0740252	0.0375485		7.9976	0.0740252	0.0375485	0.0184886	0.0286758	0.335606	0.0152025	0.01816	0.00994457	0.050036	0.651737
	3.61061		0.135148	0.0329479		8.03079	0.135148	0.0329479	0.00961595	0.0296617	0.341849	0.0152025	0.0191459	0.00994457	0.0487216	0.629719
	3.56986		0.162424	0.0306475		8.03474	0.162424	0.0306475	0.00764424	0.0283472	0.341192	0.0155311	0.0165169	0.0135594	0.0477357	0.620846
	3.52024		0.15618	0.0283472		8.0068	0.15618	0.0283472	0.0106018	0.0273613	0.338563	0.0135594	0.0161883	0.0184886	0.0470785	0.616246
	3.49954		0.174254	0.0355768		8.02981	0.174254	0.0355768	0.00863009	0.0313048	0.337906	0.00928733	0.0155311	0.0211176	0.0421492	0.617889
	3.49888		0.171296	0.0523364		8.03934	0.171296	0.0523364	0.00468667	0.043135	0.334291	0.00567252	0.0132308	0.0244038	0.0391916	0.622161
	3.51794		0.153222	0.0480643		8.05708	0.153222	0.0480643	0.00895871	0.0474071	0.330019	0.00402943	0.0155311	0.0280186	0.0368913	0.618546
	3.49132		0.153222	0.045764		8.10572	0.153222	0.045764	0.013888	0.0414919	0.327719	0.00370081	0.0201317	0.0326192	0.0365627	0.612302
	3.45189		0.198243	0.0487216		8.1113	0.198243	0.0487216	0.0194745	0.0385344	0.317532	0.00501529	0.0198031	0.0342623	0.0398489	0.599815
	3.4578		0.254437	0.0424778		8.0814	0.254437	0.0424778	0.0257183	0.0437923	0.309973	0.00567252	0.0171742	0.0313048	0.0434637	0.575826
	3.41443		0.259037	0.0326192		8.11032	0.259037	0.0326192	0.0286758	0.0454354	0.307016	0.0017291	0.0155311	0.0260469	0.0460926	0.560052
	3.39865		0.204815	0.0309762		8.12708	0.204815	0.0309762	0.0270327	0.0447781	0.30833	0.00304358	0.0122449	0.0217748	0.0477357	0.546579
	3.41936		0.154865	0.0372199		8.11787	0.154865	0.0372199	0.0234179	0.0477357	0.306687	0.00501529	0.00895871	0.0188173	0.0529936	0.534091
	3.42494		0.0911133	0.0480643		8.11755	0.0911133	0.0480643	0.0260469	0.0480643	0.302086	0.00600114	0.011259	0.0194745	0.056937	0.519303
	3.40983		0.0589087	0.0523364		8.13496	0.0589087	0.0523364	0.0227607	0.0349196	0.306687	0.00600114	0.0145452	0.0201317	0.0552939	0.503858
	3.39767		0.0924278	0.045764		8.16257	0.0924278	0.045764	0.013888	0.0227607	0.316546	0.00534391	0.0122449	0.0234179	0.0529936	0.4986
	3.41837		0.075011	0.0408347		8.20167	0.075011	0.0408347	0.0106018	0.0244038	0.319503	0.00830147	0.00830147	0.0237465	0.0513505	0.497286
	3.43152		0.0917706	0.0378771		8.21054	0.0917706	0.0378771	0.00468667	0.0352482	0.318517	0.0115877	0.00797285	0.0247324	0.0523364	0.499915
	3.38814		0.155523	0.0382058		8.19937	0.155523	0.0382058	0.0214462	0.0411633	0.311945	0.013888	0.011259	0.0257183	0.0513505	0.500572
	3.36579		0.173925	0.0336051		8.20298	0.173925	0.0336051	0.0299903	0.0421492	0.303072	0.0175028	0.0125735	0.025061	0.0493788	0.494986
	3.35593		0.127919	0.0244038		8.25819	0.127919	0.0244038	0.0322906	0.0414919	0.307673	0.0152025	0.0115877	0.0283472	0.0474071	0.485456
	3.36316		0.0710676	0.0221035		8.29368	0.0710676	0.0221035	0.0339337	0.0421492	0.309645	0.0119163	0.0142166	0.0283472	0.0464212	0.475268
	3.3303		0.0240752	0.0188173		8.25688	0.0240752	0.0188173	0.0326192	0.0428064	0.310959	0.00863009	0.0175028	0.0299903	0.0497074	0.464095
	3.30664		0.109516	0.0184886		8.23059	0.109516	0.0184886	0.0273613	0.0424778	0.306358	0.00501529	0.0214462	0.0303189	0.0559512	0.460481
	3.33194		0.117403	0.0161883		8.29039	0.117403	0.0161883	0.0221035	0.0382058	0.296829	0.00337219	0.0217748	0.0280186	0.0589087	0.455551
	3.37565		0.101958	0.011259		8.33541	0.101958	0.011259	0.0194745	0.0316334	0.292228	0.00435805	0.0178314	0.0260469	0.0598946	0.451279
	3.35298		0.0493788	0.00238634		8.35743	0.0493788	0.00238634	0.0283472	0.0270327	0.285656	0.00665838	0.0155311	0.0257183	0.0585801	0.445364
	3.35758		0.0641666	0.00435805		8.39391	0.0641666	0.00435805	0.0296617	0.0237465	0.288942	0.00863009	0.0145452	0.02769	0.0529936	0.440435
	3.3372		0.122661	0.0122449		8.3801	0.122661	0.0122449	0.0260469	0.0286758	0.299129	0.0132308	0.0142166	0.0322906	0.0510219	0.435834
	3.2396		0.0802689	0.0230893		8.34461	0.0802689	0.0230893	0.0263755	0.031962	0.301429	0.0135594	0.00961595	0.0293331	0.0533222	0.431234
	3.23073		0.0322906	0.031962		8.28284	0.0322906	0.031962	0.0230893	0.0372199	0.295514	0.0155311	0.00665838	0.0290044	0.0539794	0.421046
	3.29678		0.0644952	0.0306475		8.2595	0.0644952	0.0306475	0.0122449	0.0382058	0.288284	0.0175028	0.00567252	0.0260469	0.050036	0.413159
	3.32964		0.0589087	0.0293331		8.3479	0.0589087	0.0293331	0.00600114	0.038863	0.283684	0.0168456	0.00731562	0.0257183	0.0543081	0.402644
	3.34279		0.0503646	0.0247324		8.40245	0.0503646	0.0247324	0.00468667	0.0441209	0.277111	0.0109304	0.00665838	0.0227607	0.0582515	0.390813
	3.28791		0.0743538	0.0168456		8.42808	0.0743538	0.0168456	0.0102732	0.0441209	0.269882	0.00797285	0.00632976	0.0211176	0.0582515	0.377669
	3.24815		0.106558	0.0145452		8.43564	0.106558	0.0145452	0.0198031	0.0391916	0.266924	0.00764424	0.00961595	0.0191459	0.0549653	0.371425
	3.23763		0.126276	0.00731562		8.43531	0.126276	0.00731562	0.0234179	0.0322906	0.273168	0.0109304	0.00731562	0.0201317	0.0523364	0.36781
	3.20378		0.109187	0.00830147		8.50169	0.109187	0.00830147	0.0227607	0.0303189	0.285656	0.00928733	0.00632976	0.0240752	0.0490502	0.364853
	3.19951		0.110502	0.0227607		8.51615	0.110502	0.0227607	0.0198031	0.0326192	0.28927	0.00632976	0.00961595	0.0270327	0.045764	0.359923
	3.22087		0.0602232	0.0296617		8.42907	0.0602232	0.0296617	0.0237465	0.0349196	0.301101	0.00600114	0.0125735	0.025061	0.0441209	0.351379
	3.20937		0.0842124	0.0201317		8.34856	0.0842124	0.0201317	0.0303189	0.0332765	0.305044	0.0115877	0.0168456	0.0227607	0.0467498	0.348422
	3.17256		0.141063	0.013888		8.35644	0.141063	0.013888	0.0286758	0.0293331	0.301758	0.0132308	0.0198031	0.0247324	0.0470785	0.351379
	3.15482		0.152236	0.0129021		8.43564	0.152236	0.0129021	0.0290044	0.0365627	0.293214	0.0145452	0.0161883	0.0244038	0.0470785	0.354665
	3.17552		0.147307	0.0171742		8.4892	0.147307	0.0171742	0.0299903	0.0405061	0.293214	0.0148738	0.013888	0.0237465	0.0536508	0.352036
	3.24092		0.195943	0.0191459		8.52601	0.195943	0.0191459	0.0329479	0.0372199	0.300772	0.0109304	0.0135594	0.0263755	0.0602232	0.347436
	3.27509		0.201201	0.0129021		8.48362	0.201201	0.0129021	0.0309762	0.0385344	0.30603	0.00994457	0.0125735	0.0280186	0.0546367	0.339549
	3.25636		0.163409	0.0280186		8.48526	0.163409	0.0280186	0.0237465	0.0365627	0.30373	0.00895871	0.0102732	0.0267041	0.0497074	0.331333
	3.25045		0.101958	0.036234		8.52864	0.101958	0.036234	0.0273613	0.0283472	0.297157	0.00600114	0.00797285	0.0234179	0.0487216	0.327719
	3.30007		0.0589087	0.0349196		8.54605	0.0589087	0.0349196	0.025061	0.0257183	0.293214	0.00238634	0.00928733	0.0201317	0.0487216	0.324761
	3.34246		0.0579229	0.034591		8.59337	0.0579229	0.034591	0.0135594	0.0322906	0.288284	0.00468667	0.00830147	0.0194745	0.0480643	0.318189
	3.28002		0.0937423	0.0286758		8.62426	0.0937423	0.0286758	0.0129021	0.0352482	0.28927	0.00534391	0.00863009	0.020789	0.0470785	0.312274
	3.17059		0.102944	0.0214462		8.61637	0.102944	0.0214462	0.01816	0.038863	0.288284	0.00402943	0.00928733	0.0201317	0.0487216	0.310631
	3.10388		0.0930851	0.0175028		8.65449	0.0930851	0.0175028	0.0240752	0.031962	0.288613	0.00370081	0.0115877	0.0221035	0.0487216	0.307673
	3.07234		0.0671242	0.0145452		8.6913	0.0671242	0.0145452	0.0214462	0.0237465	0.290913	0.00402943	0.0148738	0.0211176	0.0464212	0.30373
	3.07201		0.0477357	0.0129021		8.72284	0.0477357	0.0129021	0.0184886	0.0165169	0.292228	0.00238634	0.0145452	0.0221035	0.0460926	0.301101
	3.12492		0.0664669	0.0158597		8.6959	0.0664669	0.0158597	0.0148738	0.0161883	0.296171	0.0017291	0.0109304	0.0227607	0.0460926	0.295185
	3.16369		0.0322906	0.0211176		8.63149	0.0322906	0.0211176	0.0194745	0.0201317	0.298472	0.00600114	0.00961595	0.0204604	0.0444495	0.292556
	3.21299		0.0447781	0.025061		8.619	0.0447781	0.025061	0.0178314	0.0158597	0.295843	0.00928733	0.0119163	0.0188173	0.0464212	0.288942
	3.18735		0.0842124	0.0293331		8.60717	0.0842124	0.0293331	0.0227607	0.0201317	0.295185	0.00961595	0.0148738	0.0188173	0.0506933	0.285984
	3.13379		0.12989	0.0224321		8.6167	0.12989	0.0224321	0.0221035	0.02769	0.292885	0.00928733	0.011259	0.0230893	0.056937	0.280398
	3.13675		0.0717248	0.0129021		8.65975	0.0717248	0.0129021	0.0217748	0.0293331	0.287956	0.006987	0.00797285	0.0247324	0.0582515	0.276454
	3.15219		0.0102732	0.0142166		8.65318	0.0102732	0.0142166	0.0290044	0.0227607	0.289599	0.00337219	0.00830147	0.0234179	0.0516791	0.269882
	3.11703		0.0405061	0.0306475		8.66304	0.0405061	0.0306475	0.0286758	0.0211176	0.294857	0.00370081	0.00830147	0.0237465	0.0483929	0.264953
	3.10454		0.0927564	0.025061		8.65712	0.0927564	0.025061	0.0260469	0.0329479	0.290913	0.00468667	0.00994457	0.0201317	0.050036	0.253122
	3.0799		0.12989	0.0237465		8.59863	0.12989	0.0237465	0.0263755	0.0411633	0.286641	0.00600114	0.0158597	0.0184886	0.0513505	0.250822
	3.06149		0.10623	0.0211176		8.58088	0.10623	0.0211176	0.0290044	0.0418206	0.287956	0.0109304	0.0148738	0.020789	0.050036	0.250165
	3.08614		0.121675	0.0184886		8.58187	0.121675	0.0184886	0.0253896	0.036234	0.292556	0.0122449	0.0119163	0.0244038	0.0503646	0.250165
	3.10487		0.171625	0.0217748		8.5776	0.171625	0.0217748	0.0280186	0.0267041	0.284998	0.0125735	0.0155311	0.0303189	0.0503646	0.25608
trace_02	5.55667		0.16801	0.0474071		3.8666	0.16801	0.0474071	0.0451067	0.0549653	4.10189	0.0102732	0.00764424	0.0280186	0.0572656	4.87381
	5.64638		0.16078	0.0313048		3.88501	0.16078	0.0313048	0.0299903	0.0671242	4.05227	0.011259	0.011259	0.0263755	0.0575943	4.85278
	5.77849		0.154208	0.0299903		3.94909	0.154208	0.0299903	0.0257183	0.0635094	4.01612	0.011259	0.0132308	0.0247324	0.0602232	4.84522
	5.87871		0.11806	0.031962		4.04997	0.11806	0.031962	0.0145452	0.0474071	3.96782	0.0106018	0.0148738	0.0234179	0.0628522	4.83503
	5.98781		0.0835551	0.0260469		4.08349	0.0835551	0.0260469	0.0303189	0.0122449	3.91294	0.00994457	0.013888	0.02769	0.0618663	4.80349
	6.06142		0.0523364	0.0194745		4.09466	0.0523364	0.0194745	0.0464212	0.0171742	3.87153	0.0106018	0.00961595	0.0267041	0.0608804	4.75025
	6.08443		0.0490502	0.0158597		4.14987	0.0490502	0.0158597	0.0352482	0.0368913	3.82323	0.0122449	0.00632976	0.0237465	0.0615377	4.70227
	6.13668		0.0398489	0.0175028		4.17452	0.0398489	0.0175028	0.050036	0.0720535	3.77821	0.0129021	0.00501529	0.0224321	0.0598946	4.66416
	6.16198		0.0684387	0.0198031		4.19325	0.0684387	0.0198031	0.0355768	0.0822406	3.72431	0.0109304	0.00895871	0.0214462	0.0559512	4.61651
	6.16888		0.0385344	0.0244038		4.25897	0.0385344	0.0244038	0.0273613	0.0753397	3.67042	0.0115877	0.0142166	0.0234179	0.0523364	4.53599
	6.15442		0.0516791	0.0313048		4.34113	0.0516791	0.0313048	0.00600114	0.07764	3.61587	0.0119163	0.0168456	0.0257183	0.0543081	4.48605
	6.17151		0.043135	0.0398489		4.42525	0.043135	0.0398489	0.0155311	0.0710676	3.54193	0.0102732	0.020789	0.0270327	0.0543081	4.43084
	6.21324		0.0470785	0.0368913		4.53797	0.0470785	0.0368913	0.0171742	0.0615377	3.43973	0.00830147	0.0221035	0.0267041	0.0516791	4.37267
	6.21653		0.0838837	0.0401775		4.64115	0.0838837	0.0401775	0.0520077	0.0608804	3.36086	0.0106018	0.0175028	0.0263755	0.0510219	4.25963
	6.20831		0.122003	0.0467498		4.68091	0.122003	0.0467498	0.0566084	0.0720535	3.28824	0.0106018	0.0145452	0.0257183	0.0529936	4.21888
	6.26681		0.120689	0.0441209		4.68749	0.120689	0.0441209	0.095714	0.0789545	3.19064	0.00797285	0.013888	0.0237465	0.0529936	4.18503
	6.2839		0.103929	0.0313048		4.70227	0.103929	0.0313048	0.0996574	0.101958	3.07069	0.00534391	0.0125735	0.0227607	0.0497074	4.14231
	6.26451		0.118389	0.0161883		4.75715	0.118389	0.0161883	0.075011	0.0920992	2.94549	0.00337219	0.0109304	0.025061	0.0503646	4.01251
	6.21226		0.104258	0.0125735		4.83931	0.104258	0.0125735	0.0667956	0.0628522	2.83672	0.00435805	0.0142166	0.02769	0.0556225	3.94284
	6.08574		0.091442	0.0142166		4.89189	0.091442	0.0142166	0.0454354	0.043135	2.71907	0.00567252	0.0135594	0.0306475	0.0562798	3.88106
	5.97106		0.0654811	0.0204604		4.9208	0.0654811	0.0204604	0.045764	0.0342623	2.59321	0.00830147	0.0129021	0.0303189	0.0487216	3.82191
	5.89416		0.0651525	0.0178314		4.94414	0.0651525	0.0178314	0.0401775	0.0418206	2.49956	0.00731562	0.0155311	0.0299903	0.0437923	3.69967
	5.82252		0.0835551	0.00534391		5.01249	0.0835551	0.00534391	0.0293331	0.0648239	2.39013	0.00534391	0.0148738	0.0290044	0.0405061	3.63131
	5.72164		0.0766541	0.00665838		5.15741	0.0766541	0.00665838	0.0247324	0.0723821	2.2715	0.00501529	0.0102732	0.0270327	0.0428064	3.57052
	5.59282		0.0398489	0.00797285		5.25731	0.0398489	0.00797285	0.00600114	0.0773114	2.15681	0.00863009	0.00731562	0.0234179	0.0451067	3.5071
	5.41865		0.0230893	0.00665838		5.30101	0.0230893	0.00665838	0.011259	0.0677814	2.04574	0.00928733	0.00435805	0.0204604	0.0490502	3.39241
	5.27045		0.0198031	0.0119163		5.37265	0.0198031	0.0119163	0.00994457	0.0585801	1.95405	0.00731562	0.00534391	0.0201317	0.0497074	3.32964
	5.1413		0.0677814	0.0148738		5.44001	0.0677814	0.0148738	0.0214462	0.045764	1.87058	0.00665838	0.00830147	0.0175028	0.0510219	3.26162
	5.03319		0.0651525	0.0211176		5.52677	0.0651525	0.0211176	0.0454354	0.0424778	1.78251	0.00468667	0.00895871	0.0129021	0.0536508	3.189
	4.92968		0.0368913	0.0224321		5.58855	0.0368913	0.0224321	0.0454354	0.0267041	1.69937	0.00402943	0.0119163	0.0129021	0.0566084	3.06774
	4.7634		0.0556225	0.0119163		5.6431	0.0556225	0.0119163	0.036234	0.0230893	1.62609	0.00468667	0.0152025	0.0161883	0.0582515	2.99971
	4.61026		0.0539794	0.00797285		5.71474	0.0539794	0.00797285	0.0359054	0.02769	1.55971	0.00632976	0.0171742	0.0188173	0.0592373	2.93925
	4.53862		0.0497074	0.00370081		5.80675	0.0497074	0.00370081	0.0280186	0.0286758	1.50286	0.00797285	0.0191459	0.0194745	0.0608804	2.8847
	4.47586		0.0753397	0.00304358		5.87477	0.0753397	0.00304358	0.0204604	0.0332765	1.45422	0.00534391	0.0184886	0.0175028	0.0621949	2.79794
	4.43938		0.0930851	0.00961595		5.90369	0.0930851	0.00961595	0.00600114	0.0447781	1.41512	0.00337219	0.0178314	0.0178314	0.0562798	2.73649
	4.44398		0.0973571	0.00764424		5.91749	0.0973571	0.00764424	0.0132308	0.0615377	1.38554	0.00567252	0.0142166	0.0198031	0.0510219	2.68785
	4.39502		0.0980143	0.00435805		5.92669	0.0980143	0.00435805	0.0280186	0.0661383	1.36221	0.00764424	0.0145452	0.0234179	0.0536508	2.63856
	4.34868		0.0690959	0.00501529		5.94049	0.0690959	0.00501529	0.0217748	0.0684387	1.33822	0.0119163	0.0145452	0.0286758	0.0556225	2.56101
	4.32009		0.0615377	0.0273613		5.98026	0.0615377	0.0273613	0.0224321	0.0621949	1.30536	0.0148738	0.0115877	0.0267041	0.0543081	2.49397
	4.28723		0.056937	0.0322906		6.02856	0.056937	0.0322906	0.0309762	0.0513505	1.25837	0.0184886	0.00863009	0.025061	0.0503646	2.45388
	4.2616		0.0414919	0.0270327		6.06767	0.0414919	0.0270327	0.0260469	0.0378771	1.20217	0.0204604	0.00764424	0.0247324	0.0506933	2.41642
	4.21132		0.0480643	0.0142166		6.06602	0.0480643	0.0142166	0.0234179	0.0414919	1.14204	0.0217748	0.00797285	0.0237465	0.0539794	2.37107
	4.21855		0.0575943	0.0119163		6.12846	0.0575943	0.0119163	0.0135594	0.063838	1.09241	0.0198031	0.00863009	0.0230893	0.0549653	2.31027
	4.28263		0.095714	0.020789		6.18597	0.095714	0.020789	0.0115877	0.0674528	1.06875	0.0171742	0.00370081	0.0191459	0.0520077	2.27675
	4.34343		0.110502	0.0240752		6.19287	0.110502	0.0240752	0.0135594	0.0520077	1.03753	0.0132308	0.00600114	0.0148738	0.0513505	2.25309
	4.36511		0.0937423	0.0303189		6.21127	0.0937423	0.0303189	0.006987	0.0434637	1.00664	0.00994457	0.00863009	0.0158597	0.0533222	2.22976
	4.34737		0.0940709	0.0221035		6.23986	0.0940709	0.0221035	0.00567252	0.0359054	0.982984	0.00797285	0.00928733	0.0201317	0.0533222	2.14629
	4.31221		0.103601	0.013888		6.2839	0.103601	0.013888	0.00731562	0.0418206	0.955051	0.00501529	0.00895871	0.0211176	0.0529936	2.1016
	4.26883		0.0401775	0.00632976		6.37163	0.0401775	0.00632976	0.00271496	0.045764	0.937306	0.00567252	0.006987	0.0221035	0.0533222	2.07958
	4.25339		0.0352482	0.0178314		6.37886	0.0352482	0.0178314	0.0145452	0.0510219	0.917917	0.00928733	0.011259	0.020789	0.056937	2.05822
	4.21461		0.0848696	0.0267041		6.38379	0.0848696	0.0267041	0.00534391	0.0631808	0.899186	0.00928733	0.0171742	0.0214462	0.0575943	2.00367
	4.2731		0.0805975	0.0129021		6.43999	0.0805975	0.0129021	0.0129021	0.0651525	0.872897	0.00961595	0.0178314	0.0237465	0.0602232	1.97837
	4.38155		0.0421492	0.00567252		6.43177	0.0421492	0.00567252	0.0204604	0.0694245	0.849565	0.0106018	0.0132308	0.0273613	0.0592373	1.95405
	4.45746		0.121346	0.00468667		6.41534	0.121346	0.00468667	0.0267041	0.0664669	0.833791	0.0115877	0.00797285	0.0257183	0.0539794	1.93203
	4.49459		0.111159	0.0171742		6.41304	0.111159	0.0171742	0.0184886	0.0546367	0.814403	0.0115877	0.00567252	0.0188173	0.0480643	1.90213
	4.47882		0.121346	0.0306475		6.42783	0.121346	0.0306475	0.0132308	0.0428064	0.793042	0.0106018	0.00468667	0.0142166	0.0460926	1.8788
	4.4568		0.0799403	0.0368913		6.49125	0.0799403	0.0368913	0.0129021	0.0365627	0.771025	0.00961595	0.00665838	0.0168456	0.0470785	1.85875
	4.44201		0.0825693	0.0326192		6.54876	0.0825693	0.0326192	0.0165169	0.0375485	0.745064	0.00928733	0.00961595	0.0204604	0.0480643	1.85152
	4.44234		0.0792831	0.0244038		6.56617	0.0792831	0.0244038	0.0194745	0.036234	0.728633	0.0109304	0.0102732	0.0214462	0.045764	1.83148
	4.37267		0.0953854	0.0175028		6.5711	0.0953854	0.0175028	0.0253896	0.0309762	0.704973	0.0106018	0.00830147	0.0237465	0.0497074	1.81307
	4.30005		0.0786258	0.0240752		6.59213	0.0786258	0.0240752	0.0290044	0.025061	0.689199	0.0115877	0.0102732	0.0237465	0.0549653	1.79303
	4.22545		0.0493788	0.0286758		6.62598	0.0493788	0.0286758	0.025061	0.0260469	0.684927	0.0119163	0.0132308	0.0201317	0.0579229	1.7651
	4.16663		0.0940709	0.0267041		6.6618	0.0940709	0.0267041	0.0237465	0.0224321	0.675068	0.00830147	0.0152025	0.0158597	0.0582515	1.69411
	4.16302		0.126604	0.0204604		6.72522	0.126604	0.0204604	0.0155311	0.0211176	0.660609	0.00961595	0.01816	0.0145452	0.0546367	1.64646
	4.10452		0.133505	0.0204604		6.82282	0.133505	0.0204604	0.0267041	0.0283472	0.648122	0.0132308	0.0201317	0.0155311	0.0529936	1.61262
	4.06049		0.149607	0.0158597		6.82085	0.149607	0.0158597	0.0372199	0.0332765	0.62939	0.013888	0.0247324	0.0184886	0.0506933	1.58994
	4.07067		0.145007	0.0191459		6.82578	0.145007	0.0191459	0.0382058	0.038863	0.614931	0.0125735	0.0270327	0.020789	0.0510219	1.55577
	4.06082		0.103929	0.0309762		6.87901	0.103929	0.0309762	0.02769	0.0372199	0.610002	0.0125735	0.0221035	0.0188173	0.0483929	1.53473
	4.06903		0.0769827	0.0290044		6.91845	0.0769827	0.0290044	0.0155311	0.0405061	0.614931	0.0115877	0.0158597	0.0158597	0.0437923	1.51272
	4.12128		0.100643	0.0293331		6.94079	0.100643	0.0293331	0.0188173	0.0454354	0.611974	0.0106018	0.0122449	0.0191459	0.0405061	1.48676
	4.14757		0.122661	0.0283472		6.93093	0.122661	0.0283472	0.0224321	0.0480643	0.599158	0.00764424	0.006987	0.020789	0.0437923	1.44174
	4.11602		0.128247	0.0191459		6.92206	0.128247	0.0191459	0.0221035	0.052665	0.585684	0.00665838	0.00468667	0.0227607	0.0490502	1.41315
	4.07002		0.110173	0.013888		6.97004	0.110173	0.013888	0.0234179	0.0510219	0.566953	0.00895871	0.00830147	0.0263755	0.0529936	1.3977
	4.08316		0.103272	0.00567252		7.07914	0.103272	0.00567252	0.01816	0.0391916	0.549208	0.0109304	0.00764424	0.0273613	0.0552939	1.38258
	4.11832		0.0963712	0.0102732		7.1373	0.0963712	0.0102732	0.0286758	0.0368913	0.530805	0.013888	0.00665838	0.0273613	0.0575943	1.36188
	4.10156		0.126276	0.0267041		7.15899	0.126276	0.0267041	0.0313048	0.0398489	0.511088	0.0119163	0.00830147	0.0257183	0.0585801	1.32902
	4.08513		0.11576	0.0240752		7.20532	0.11576	0.0240752	0.0280186	0.0421492	0.497286	0.006987	0.00961595	0.025061	0.0598946	1.30437
	4.06805		0.0224321	0.0158597		7.27236	0.0224321	0.0158597	0.0234179	0.0444495	0.495314	0.00468667	0.00863009	0.0253896	0.0589087	1.27808
	4.06706		0.0483929	0.0145452		7.28452	0.0483929	0.0145452	0.0299903	0.0503646	0.497614	0.00370081	0.00961595	0.0306475	0.0552939	1.25902
	4.10912		0.0552939	0.0309762		7.33052	0.0552939	0.0309762	0.0293331	0.050036	0.487756	0.00402943	0.0119163	0.0326192	0.0513505	1.22386
	4.14396		0.0556225	0.0467498		7.37324	0.0556225	0.0467498	0.0273613	0.0378771	0.481512	0.006987	0.0125735	0.0332765	0.0510219	1.20842
	4.16959		0.0437923	0.0516791		7.38277	0.0437923	0.0516791	0.0237465	0.0395202	0.470996	0.00863009	0.0142166	0.0290044	0.0516791	1.19264
	4.19555		0.0247324	0.0464212		7.39329	0.0247324	0.0464212	0.0119163	0.0444495	0.459495	0.013888	0.0142166	0.0260469	0.0543081	1.17555
	4.16794		0.0326192	0.0332765		7.32231	0.0326192	0.0332765	0.0148738	0.0467498	0.445364	0.0168456	0.0175028	0.0257183	0.0539794	1.14664
	4.08809		0.0641666	0.02769		7.27335	0.0641666	0.02769	0.0326192	0.0454354	0.432219	0.0168456	0.0217748	0.0260469	0.0572656	1.14072
	4.05096		0.0513505	0.0303189		7.29898	0.0513505	0.0303189	0.0391916	0.0447781	0.431891	0.0152025	0.0217748	0.0240752	0.0539794	1.13152
	4.03124		0.0618663	0.0283472		7.34334	0.0618663	0.0283472	0.0306475	0.0451067	0.433534	0.0129021	0.0158597	0.0198031	0.0474071	1.1141
	4.00659		0.043135	0.0165169		7.39822	0.043135	0.0165169	0.0286758	0.0497074	0.442735	0.0125735	0.0129021	0.0178314	0.0467498	1.07368
	3.99444		0.0805975	0.0171742		7.42976	0.0805975	0.0171742	0.0217748	0.0447781	0.438792	0.0125735	0.0161883	0.0178314	0.0503646	1.05824
	4.00429		0.133834	0.0184886		7.46098	0.133834	0.0184886	0.0155311	0.0408347	0.431234	0.0125735	0.0191459	0.0234179	0.0493788	1.04312
	3.95697		0.132848	0.0158597		7.50666	0.132848	0.0158597	0.0152025	0.0451067	0.422361	0.0106018	0.0165169	0.0260469	0.0483929	1.03096
	3.83473		0.0631808	0.0119163		7.53919	0.0631808	0.0119163	0.0152025	0.0398489	0.414803	0.00600114	0.0122449	0.0299903	0.0539794	1.00106
	3.77196		0.0257183	0.0168456		7.55267	0.0257183	0.0168456	0.0142166	0.0326192	0.409873	0.00567252	0.0102732	0.0322906	0.0536508	0.986599
	3.76605		0.0618663	0.0125735		7.59571	0.0618663	0.0125735	0.00895871	0.0230893	0.406916	0.00797285	0.00928733	0.0296617	0.0503646	0.975426
	3.79201		0.091442	0.00731562		7.64993	0.091442	0.00731562	0.0161883	0.020789	0.409216	0.0115877	0.00895871	0.0237465	0.0451067	0.963267
	3.77558		0.126604	0.00665838		7.67359	0.126604	0.00665838	0.0158597	0.0198031	0.407244	0.0106018	0.0119163	0.01816	0.0414919	0.941578
	3.75225		0.14665	0.00468667		7.65749	0.14665	0.00468667	0.0145452	0.0191459	0.397714	0.0115877	0.0132308	0.0184886	0.0421492	0.930405
	3.70788		0.119046	0.00764424		7.67984	0.119046	0.00764424	0.0129021	0.0267041	0.391142	0.0125735	0.0129021	0.0227607	0.0480643	0.916932
	3.67929		0.111159	0.0115877		7.69298	0.111159	0.0115877	0.0122449	0.0424778	0.381941	0.0145452	0.0152025	0.0253896	0.0516791	0.902144
	3.68324		0.0651525	0.0148738		7.64336	0.0651525	0.0148738	0.00895871	0.0523364	0.371754	0.0152025	0.0148738	0.0227607	0.0533222	0.887027
	3.61718		0.0178314	0.025061		7.64205	0.0178314	0.025061	0.00863009	0.0539794	0.372739	0.0132308	0.0152025	0.0247324	0.0552939	0.880126
	3.56822		0.0299903	0.0214462		7.69594	0.0299903	0.0214462	0.0125735	0.0516791	0.376026	0.0106018	0.01816	0.0306475	0.0575943	0.870268
	3.57019		0.0828979	0.0224321		7.7081	0.0828979	0.0224321	0.0204604	0.0434637	0.369453	0.00994457	0.0175028	0.0299903	0.0575943	0.854823
	3.64906		0.0664669	0.0230893		7.7242	0.0664669	0.0230893	0.0293331	0.0342623	0.363867	0.0145452	0.0148738	0.0303189	0.0572656	0.83872
	3.71938		0.0355768	0.0224321		7.75147	0.0355768	0.0224321	0.0309762	0.031962	0.35828	0.0165169	0.0142166	0.0303189	0.056937	0.827876
	3.73779		0.01816	0.0260469		7.7288	0.01816	0.0260469	0.0290044	0.0375485	0.361895	0.0188173	0.0161883	0.0280186	0.0549653	0.819003
	3.7161		0.0293331	0.0142166		7.71598	0.0293331	0.0142166	0.0217748	0.0454354	0.359266	0.0188173	0.0175028	0.0247324	0.0513505	0.808488
	3.72201		0.0378771	0.0122449		7.71204	0.0378771	0.0122449	0.0188173	0.0411633	0.35598	0.0194745	0.0175028	0.0227607	0.0477357	0.792057
	3.64709		0.0927564	0.0503646		7.7196	0.0927564	0.0503646	0.0240752	0.0352482	0.350393	0.0211176	0.0158597	0.0237465	0.0441209	0.767739
	3.58202		0.11576	0.0579229		7.7449	0.11576	0.0579229	0.0273613	0.0296617	0.354008	0.0234179	0.0161883	0.0257183	0.0418206	0.753608
	3.58564		0.0687673	0.0592373		7.76462	0.0687673	0.0592373	0.02769	0.0244038	0.356966	0.0237465	0.0155311	0.0247324	0.0424778	0.744736
	3.55475		0.0697531	0.0421492		7.74589	0.0697531	0.0421492	0.0303189	0.0244038	0.352365	0.0221035	0.0178314	0.0234179	0.0414919	0.739149
	3.54423		0.118717	0.00731562		7.75706	0.118717	0.00731562	0.0237465	0.0290044	0.337249	0.0204604	0.0175028	0.0237465	0.0414919	0.72239
	3.5416		0.171625	0.00468667		7.73439	0.171625	0.00468667	0.0217748	0.031962	0.322132	0.0178314	0.0158597	0.0273613	0.0467498	0.713517
	3.51893		0.218617	0.00370081		7.75739	0.218617	0.00370081	0.0214462	0.0303189	0.324432	0.0135594	0.0115877	0.0273613	0.0513505	0.700701
	3.51663		0.218617	0.00337219		7.83166	0.218617	0.00337219	0.0240752	0.0329479	0.32739	0.0109304	0.00830147	0.0273613	0.0529936	0.68657
	3.57249		0.150922	0.0145452		7.83396	0.150922	0.0145452	0.0240752	0.0286758	0.331333	0.0102732	0.00961595	0.0240752	0.0539794	0.669811
	3.61028		0.123647	0.020789		7.85499	0.123647	0.020789	0.0234179	0.0329479	0.332319	0.00863009	0.00797285	0.0240752	0.0539794	0.660609
	3.63756		0.125618	0.0240752		7.90001	0.125618	0.0240752	0.025061	0.031962	0.33462	0.00632976	0.00797285	0.0253896	0.0549653	0.650751
	3.60601		0.105573	0.0191459		7.91184	0.105573	0.0191459	0.0214462	0.0332765	0.334948	0.00567252	0.00632976	0.0257183	0.056937	0.647793
	3.51761		0.0924278	0.00994457		7.92432	0.0924278	0.00994457	0.0132308	0.0398489	0.337249	0.00731562	0.00435805	0.0244038	0.0566084	0.644836
	3.46635		0.0490502	0.0204604		7.90986	0.0490502	0.0204604	0.0145452	0.0464212	0.333962	0.00830147	0.00370081	0.0214462	0.0536508	0.641221
	3.4141		0.0165169	0.0303189		7.93057	0.0165169	0.0303189	0.0184886	0.0395202	0.330348	0.00961595	0.00567252	0.0194745	0.0562798	0.63432
	3.39931		0.0493788	0.0365627		7.96967	0.0493788	0.0365627	0.0221035	0.0352482	0.326733	0.0129021	0.011259	0.0211176	0.0602232	0.62479
	3.39602		0.0648239	0.0263755		7.98906	0.0648239	0.0263755	0.0273613	0.0329479	0.325747	0.013888	0.0148738	0.0247324	0.0612091	0.600472
	3.34903		0.0470785	0.0184886		7.96901	0.0470785	0.0184886	0.0260469	0.0286758	0.326404	0.0135594	0.0145452	0.0293331	0.0608804	0.588642
	3.37039		0.11806	0.00895871		7.98216	0.11806	0.00895871	0.0217748	0.0303189	0.326733	0.0125735	0.0135594	0.0326192	0.0631808	0.581412
	3.43053		0.12759	0.00632976		7.9907	0.12759	0.00632976	0.0221035	0.0247324	0.314245	0.0115877	0.0132308	0.0316334	0.0605518	0.580098
	3.38157		0.140735	0.0102732		8.05182	0.140735	0.0102732	0.0158597	0.025061	0.303072	0.0106018	0.0122449	0.0253896	0.0539794	0.562681
	3.36283		0.125947	0.0155311		8.09323	0.125947	0.0155311	0.0161883	0.0303189	0.308002	0.0119163	0.0132308	0.0227607	0.0474071	0.55348
	3.33424		0.0812548	0.0188173		8.1228	0.0812548	0.0188173	0.0145452	0.0352482	0.313259	0.0122449	0.0152025	0.0217748	0.0477357	0.54625
	3.31256		0.0950568	0.0227607		8.16881	0.0950568	0.0227607	0.0175028	0.0408347	0.313917	0.0109304	0.0145452	0.0237465	0.0523364	0.540663
	3.36513		0.0589087	0.0234179		8.16224	0.0589087	0.0234179	0.020789	0.0434637	0.307673	0.00665838	0.0102732	0.0263755	0.0536508	0.528833
	3.36481		0.0299903	0.0273613		8.12149	0.0299903	0.0273613	0.020789	0.0391916	0.307344	0.00468667	0.00534391	0.0263755	0.0520077	0.522261
	3.34082		0.0710676	0.0267041		8.10342	0.0710676	0.0267041	0.0204604	0.0322906	0.306358	0.00534391	0.00304358	0.0260469	0.0487216	0.517989
	3.37105		0.0802689	0.0198031		8.08863	0.0802689	0.0198031	0.01816	0.0349196	0.306358	0.006987	0.00370081	0.0240752	0.0467498	0.516674
	3.35725		0.105244	0.0184886		8.11426	0.105244	0.0184886	0.0175028	0.0395202	0.305044	0.00863009	0.00402943	0.0230893	0.0470785	0.505173
	3.3395		0.126276	0.034591		8.15435	0.126276	0.034591	0.0171742	0.0375485	0.300772	0.0106018	0.00402943	0.0221035	0.050036	0.494
	3.3464		0.0911133	0.0375485		8.16979	0.0911133	0.0375485	0.0125735	0.0313048	0.2988	0.0115877	0.00731562	0.020789	0.0513505	0.493342
	3.30894		0.0743538	0.0299903		8.17669	0.0743538	0.0299903	0.0129021	0.025061	0.299786	0.0122449	0.0125735	0.0201317	0.0510219	0.496957
	3.28364		0.0434637	0.01816		8.21054	0.0434637	0.01816	0.0244038	0.0260469	0.299786	0.0119163	0.0145452	0.0221035	0.0497074	0.496629
	3.26951		0.0628522	0.0106018		8.19575	0.0628522	0.0106018	0.0313048	0.0306475	0.300115	0.00895871	0.0145452	0.020789	0.0454354	0.491371
	3.24979		0.0674528	0.01816		8.23124	0.0674528	0.01816	0.0270327	0.0336051	0.292885	0.00764424	0.0102732	0.0201317	0.0454354	0.483484
	3.21989		0.0451067	0.0142166		8.25359	0.0451067	0.0142166	0.01816	0.036234	0.28927	0.00895871	0.00632976	0.0217748	0.0474071	0.476254
	3.23566		0.00830147	0.0129021		8.25293	0.00830147	0.0129021	0.0184886	0.0378771	0.292885	0.00961595	0.00764424	0.0198031	0.0464212	0.470668
	3.23533		0.0470785	0.0161883		8.24636	0.0470785	0.0161883	0.0234179	0.0342623	0.295514	0.00961595	0.0106018	0.0184886	0.0483929	0.461466
	3.21068		0.0710676	0.013888		8.17867	0.0710676	0.013888	0.0217748	0.034591	0.2965	0.00928733	0.0125735	0.0178314	0.0493788	0.451279
	3.21299		0.0615377	0.0145452		8.15238	0.0615377	0.0145452	0.0158597	0.038863	0.295514	0.00863009	0.0109304	0.0168456	0.0503646	0.442078
	3.1959		0.0605518	0.0237465		8.13956	0.0605518	0.0237465	0.0125735	0.0424778	0.293542	0.00665838	0.00534391	0.0201317	0.0497074	0.433205
	3.17092		0.104915	0.0411633		8.16651	0.104915	0.0411633	0.0152025	0.045764	0.300443	0.00797285	0.00435805	0.0221035	0.0520077	0.418089
	3.14036		0.133177	0.0313048		8.1813	0.133177	0.0313048	0.0211176	0.0467498	0.297157	0.011259	0.00304358	0.0214462	0.0529936	0.411516
	3.09797		0.11083	0.0201317		8.20134	0.11083	0.0201317	0.025061	0.0418206	0.293214	0.0129021	0.00895871	0.0230893	0.052665	0.409873
	3.0868		0.0283472	0.0168456		8.22599	0.0283472	0.0168456	0.0293331	0.0355768	0.290256	0.0106018	0.00928733	0.0237465	0.0506933	0.40823
	3.13477		0.0352482	0.00764424		8.26673	0.0352482	0.00764424	0.0234179	0.0365627	0.289599	0.00961595	0.00961595	0.0257183	0.0543081	0.402972
	3.24355		0.0539794	0.011259		8.28382	0.0539794	0.011259	0.0191459	0.034591	0.28697	0.00994457	0.0119163	0.0257183	0.0562798	0.398372
	3.26852		0.025061	0.00994457		8.27396	0.025061	0.00994457	0.0227607	0.0313048	0.28927	0.0109304	0.0129021	0.0260469	0.0529936	0.395414
	3.24519		0.0191459	0.0175028		8.28086	0.0191459	0.0175028	0.0171742	0.0313048	0.292885	0.0135594	0.0119163	0.0299903	0.0470785	0.391471
	3.20641		0.0907847	0.0253896		8.28678	0.0907847	0.0253896	0.00468667	0.0316334	0.292556	0.0152025	0.0115877	0.0273613	0.0434637	0.380298
	3.14693		0.142378	0.0263755		8.28514	0.142378	0.0263755	0.00304358	0.0326192	0.28927	0.0142166	0.011259	0.025061	0.0434637	0.373068
	3.11966		0.116746	0.0263755		8.29138	0.116746	0.0263755	0.00337219	0.0309762	0.291571	0.0119163	0.00928733	0.0237465	0.0490502	0.367482
	3.15975		0.0651525	0.0395202		8.24998	0.0651525	0.0395202	0.00830147	0.036234	0.292228	0.006987	0.00632976	0.0230893	0.0513505	0.361238
	3.14233		0.0717248	0.0503646		8.24439	0.0717248	0.0503646	0.00928733	0.0339337	0.298472	0.00238634	0.00600114	0.0273613	0.0549653	0.340535
	3.10586		0.0799403	0.0411633		8.24307	0.0799403	0.0411633	0.006987	0.0322906	0.304058	0.00370081	0.00961595	0.0313048	0.0605518	0.327061
	3.11703		0.0654811	0.0342623		8.26673	0.0654811	0.0342623	0.00731562	0.0359054	0.302744	0.00665838	0.0152025	0.0306475	0.0582515	0.318517
	3.12426		0.0516791	0.0385344		8.28251	0.0516791	0.0385344	0.00567252	0.0355768	0.2942	0.00600114	0.0168456	0.0296617	0.0539794	0.315231
	3.10618		0.0661383	0.0405061		8.32227	0.0661383	0.0405061	0.0102732	0.0332765	0.28927	0.0017291	0.0122449	0.0309762	0.052665	0.318517
	3.10553		0.0884844	0.052665		8.32063	0.0884844	0.052665	0.0171742	0.0339337	0.28927	0.00402943	0.0106018	0.0270327	0.0556225	0.318189
	3.11407		0.0927564	0.0572656		8.33771	0.0927564	0.0572656	0.0240752	0.0306475	0.289599	0.00764424	0.013888	0.0253896	0.0572656	0.314903
	3.13379		0.0950568	0.0539794		8.36893	0.0950568	0.0539794	0.0247324	0.0214462	0.287956	0.0115877	0.0188173	0.0263755	0.0520077	0.312931
	3.15383		0.102944	0.0460926		8.39916	0.102944	0.0460926	0.0188173	0.0188173	0.288284	0.0152025	0.0204604	0.0253896	0.0460926	0.307344
	3.15909		0.0697531	0.0359054		8.43334	0.0697531	0.0359054	0.0237465	0.0260469	0.291242	0.0152025	0.0161883	0.0211176	0.0437923	0.304058
	3.1374		0.0723821	0.0395202		8.43005	0.0723821	0.0395202	0.0290044	0.0322906	0.295843	0.0132308	0.0145452	0.0175028	0.0441209	0.302415
	3.08285		0.0842124	0.0355768		8.42019	0.0842124	0.0355768	0.02769	0.0316334	0.294857	0.011259	0.0115877	0.0168456	0.0451067	0.2988
	3.07037		0.0618663	0.0299903		8.44057	0.0618663	0.0299903	0.0280186	0.0378771	0.28927	0.006987	0.00994457	0.01816	0.0447781	0.291571
	3.1144		0.0267041	0.0309762		8.48756	0.0267041	0.0309762	0.0214462	0.036234	0.281055	0.00665838	0.00435805	0.0184886	0.0474071	0.289599
	3.11276		0.099986	0.0339337		8.52601	0.099986	0.0339337	0.0106018	0.0339337	0.283684	0.00632976	0.00402943	0.0184886	0.0506933	0.293542
	3.12097		0.136791	0.031962		8.48854	0.136791	0.031962	0.00928733	0.0336051	0.28927	0.00665838	0.00961595	0.01816	0.0487216	0.2965
	3.09665		0.100643	0.0280186		8.48789	0.100643	0.0280186	0.0109304	0.0313048	0.283355	0.0106018	0.013888	0.0178314	0.0460926	0.299786
	3.03717		0.113788	0.0263755		8.52633	0.113788	0.0263755	0.0119163	0.0280186	0.27744	0.011259	0.0122449	0.0234179	0.0437923	0.298472
	3.03455		0.152236	0.0201317		8.52108	0.152236	0.0201317	0.00830147	0.031962	0.275468	0.011259	0.0122449	0.0286758	0.0451067	0.297814
	3.03257		0.180169	0.0184886		8.50366	0.180169	0.0184886	0.0109304	0.0332765	0.27514	0.0102732	0.00961595	0.0303189	0.0506933	0.296171
trace_03	5.8866		0.0927564	0.00764424		4.01021	0.0927564	0.00764424	0.0470785	0.0779686	3.78938	0.0122449	0.0175028	0.0227607	0.0546367	4.72988
	5.97007		0.0503646	0.00140048		4.03978	0.0503646	0.00140048	0.045764	0.0966999	3.79727	0.0142166	0.0132308	0.0214462	0.0506933	4.69472
	6.00556		0.0585801	0.00961595		4.0825	0.0585801	0.00961595	0.0822406	0.108202	3.79135	0.013888	0.0119163	0.0198031	0.0506933	4.67796
	6.05715		0.070739	0.0158597		4.12851	0.070739	0.0158597	0.0822406	0.12036	3.76835	0.0161883	0.00830147	0.020789	0.052665	4.66843
	6.11893		0.0434637	0.01816		4.1732	0.0434637	0.01816	0.0559512	0.100643	3.7299	0.0184886	0.00928733	0.0194745	0.0549653	4.63031
	6.1886		0.110502	0.0142166		4.20606	0.110502	0.0142166	0.0270327	0.0733679	3.68816	0.0184886	0.0122449	0.0217748	0.0559512	4.58233
	6.20306		0.138763	0.0106018		4.24944	0.138763	0.0106018	0.0224321	0.0454354	3.63854	0.0165169	0.0188173	0.0191459	0.0556225	4.53435
	6.1955		0.117074	0.00994457		4.31451	0.117074	0.00994457	0.0490502	0.0299903	3.5531	0.0145452	0.0221035	0.0158597	0.0562798	4.48933
	6.20174		0.0546367	0.00337219		4.38647	0.0546367	0.00337219	0.070739	0.0352482	3.45978	0.011259	0.0224321	0.0125735	0.0582515	4.42952
	6.21357		0.0306475	0.00205772		4.443	0.0306475	0.00205772	0.0717248	0.0628522	3.36448	0.00895871	0.020789	0.0115877	0.0579229	4.39502
	6.17545		0.059566	0.00468667		4.46107	0.059566	0.00468667	0.0815834	0.104258	3.29645	0.00764424	0.0194745	0.013888	0.0552939	4.35821
	6.16034		0.0260469	0.00370081		4.52252	0.0260469	0.00370081	0.0687673	0.122661	3.2212	0.00567252	0.0188173	0.0158597	0.0529936	4.30301
	6.18202		0.0477357	0.00337219		4.62045	0.0477357	0.00337219	0.0566084	0.121346	3.15482	0.00468667	0.0178314	0.0129021	0.0562798	4.22085
	6.14423		0.0286758	0.0017291		4.72462	0.0286758	0.0017291	0.0451067	0.0976857	3.07267	0.00632976	0.0158597	0.0142166	0.0579229	4.12851
	6.1232		0.0129021	0.00534391		4.79166	0.0129021	0.00534391	0.0322906	0.0677814	2.96948	0.00600114	0.0129021	0.0171742	0.0566084	4.06476
	6.12353		0.0572656	0.0145452		4.81696	0.0572656	0.0145452	0.0434637	0.043135	2.86432	0.00435805	0.00994457	0.0201317	0.0516791	3.98984
	6.06898		0.0937423	0.0224321		4.85771	0.0937423	0.0224321	0.0421492	0.0263755	2.74471	0.00435805	0.0142166	0.0260469	0.0520077	3.92608
	6.00753		0.0924278	0.0286758		4.93428	0.0924278	0.0286758	0.0572656	0.0470785	2.65466	0.00764424	0.0168456	0.0303189	0.0529936	3.83013
	5.98617		0.106558	0.02769		5.02563	0.106558	0.02769	0.06811	0.0704104	2.58303	0.00600114	0.0184886	0.0309762	0.0523364	3.77788
	5.94575		0.0329479	0.01816		5.12323	0.0329479	0.01816	0.0608804	0.0727107	2.4897	0.0017291	0.0247324	0.0316334	0.0536508	3.72398
	5.90763		0.0414919	0.0175028		5.19388	0.0414919	0.0175028	0.0690959	0.059566	2.37764	0.00402943	0.0296617	0.0306475	0.0523364	3.65662
	5.82778		0.0667956	0.0158597		5.24613	0.0667956	0.0158597	0.0628522	0.056937	2.25408	0.00895871	0.0316334	0.0280186	0.0536508	3.50743
	5.74431		0.0779686	0.0165169		5.28064	0.0779686	0.0165169	0.0460926	0.0562798	2.14761	0.00928733	0.0303189	0.0247324	0.0605518	3.45222
	5.62831		0.0825693	0.0178314		5.3434	0.0825693	0.0178314	0.0355768	0.0556225	2.05592	0.00797285	0.0273613	0.025061	0.0628522	3.41213
	5.56259		0.101301	0.0201317		5.44264	0.101301	0.0201317	0.0230893	0.0552939	1.96785	0.006987	0.0221035	0.0273613	0.0618663	3.38091
	5.48175		0.121018	0.0214462		5.54681	0.121018	0.0214462	0.0152025	0.050036	1.86401	0.00337219	0.0161883	0.0270327	0.0671242	3.31486
	5.38119		0.110173	0.0188173		5.61418	0.110173	0.0188173	0.0267041	0.0523364	1.74111	0.00271496	0.0171742	0.0244038	0.0667956	3.26523
	5.25862		0.125618	0.0125735		5.65296	0.125618	0.0125735	0.0385344	0.0556225	1.62445	0.00435805	0.0168456	0.0230893	0.0661383	3.19754
	5.13112		0.070739	0.0240752		5.66314	0.070739	0.0240752	0.0520077	0.0552939	1.53408	0.00435805	0.013888	0.0217748	0.0648239	3.12722
	5.00756		0.0395202	0.0303189		5.6523	0.0395202	0.0303189	0.0552939	0.0644952	1.45587	0.00468667	0.013888	0.0211176	0.0608804	3.02304
	4.89123		0.0539794	0.0342623		5.70028	0.0539794	0.0342623	0.0506933	0.0625235	1.39606	0.00534391	0.0145452	0.0214462	0.0552939	2.96751
	4.80809		0.0891416	0.0368913		5.79262	0.0891416	0.0368913	0.0493788	0.0477357	1.36747	0.00567252	0.0161883	0.0227607	0.0543081	2.91887
	4.71969		0.0881558	0.0470785		5.89679	0.0881558	0.0470785	0.0447781	0.0480643	1.33526	0.00567252	0.0115877	0.0240752	0.0536508	2.86662
	4.56064		0.149936	0.0533222		5.98551	0.149936	0.0533222	0.0414919	0.0536508	1.28071	0.00895871	0.00830147	0.0227607	0.0480643	2.7848
	4.4591		0.177869	0.0513505		6.08147	0.177869	0.0513505	0.0106018	0.0572656	1.24226	0.011259	0.00797285	0.0204604	0.0444495	2.74766
	4.45943		0.142706	0.0513505		6.09659	0.142706	0.0513505	0.0129021	0.0618663	1.21335	0.0152025	0.0106018	0.0161883	0.0474071	2.71316
	4.41309		0.131533	0.0260469		6.07654	0.131533	0.0260469	0.0375485	0.0684387	1.19593	0.0158597	0.0109304	0.0171742	0.0480643	2.66617
	4.37793		0.181483	0.0194745		6.11104	0.181483	0.0194745	0.0326192	0.0575943	1.18114	0.0132308	0.00830147	0.020789	0.0536508	2.59223
	4.31977		0.197257	0.0201317		6.11006	0.197257	0.0201317	0.00435805	0.0483929	1.14861	0.00994457	0.00567252	0.0224321	0.056937	2.55312
	4.26423		0.181812	0.0247324		6.10349	0.181812	0.0247324	0.00830147	0.0405061	1.10819	0.00863009	0.00830147	0.0237465	0.0585801	2.5334
	4.21954		0.193642	0.0332765		6.10842	0.193642	0.0332765	0.0109304	0.0444495	1.07763	0.00797285	0.013888	0.0263755	0.059566	2.515
	4.21954		0.219603	0.0270327		6.1347	0.219603	0.0270327	0.0102732	0.0536508	1.04706	0.00830147	0.0155311	0.0322906	0.0575943	2.45651
	4.27967		0.234391	0.020789		6.20043	0.234391	0.020789	0.00205772	0.0658097	1.00402	0.00632976	0.0171742	0.0365627	0.059566	2.38914
	4.35493		0.210402	0.0152025		6.26845	0.210402	0.0152025	0.00435805	0.0697531	0.962281	0.00994457	0.0168456	0.0326192	0.0625235	2.34248
	4.37497		0.168996	0.0135594		6.31741	0.168996	0.0135594	0.013888	0.0644952	0.933363	0.0109304	0.0142166	0.0293331	0.0635094	2.3083
	4.42722		0.121018	0.0201317		6.39135	0.121018	0.0201317	0.0270327	0.0628522	0.900501	0.00731562	0.0102732	0.0286758	0.0598946	2.2738
	4.46008		0.106558	0.0221035		6.44656	0.106558	0.0221035	0.0306475	0.0579229	0.870596	0.00107186	0.00337219	0.0227607	0.0533222	2.22122
	4.50445		0.0713962	0.0132308		6.50538	0.0713962	0.0132308	0.0188173	0.063838	0.838392	0.00205772	0.00337219	0.0198031	0.0480643	2.19263
	4.62834		0.0766541	0.00764424		6.532	0.0766541	0.00764424	0.0122449	0.0644952	0.815389	0.00370081	0.00567252	0.0230893	0.0493788	2.16239
	4.68847		0.0930851	0.0106018		6.5435	0.0930851	0.0106018	0.0286758	0.0585801	0.7983	0.00797285	0.0109304	0.0253896	0.0490502	2.13249
	4.72331		0.103929	0.00567252		6.61711	0.103929	0.00567252	0.02769	0.0497074	0.775297	0.0132308	0.011259	0.020789	0.0493788	2.05789
	4.7726		0.112802	0.00402943		6.70025	0.112802	0.00402943	0.0260469	0.0421492	0.756894	0.0119163	0.0155311	0.0191459	0.050036	2.02503
	4.77326		0.0828979	0.00468667		6.74198	0.0828979	0.00468667	0.0280186	0.0359054	0.749008	0.00731562	0.0194745	0.0188173	0.0529936	1.99809
	4.74105		0.113459	0.00797285		6.78207	0.113459	0.00797285	0.0184886	0.0309762	0.745721	0.00402943	0.020789	0.0198031	0.0546367	1.96851
	4.73086		0.10623	0.011259		6.76466	0.10623	0.011259	0.0168456	0.0270327	0.738163	0.00961595	0.0188173	0.0211176	0.0536508	1.90049
	4.76077		0.104258	0.0171742		6.74494	0.104258	0.0171742	0.0175028	0.0322906	0.718117	0.00994457	0.0184886	0.0211176	0.050036	1.86697
	4.75091		0.0878272	0.0280186		6.75973	0.0878272	0.0280186	0.0253896	0.0428064	0.68657	0.0109304	0.01816	0.0188173	0.0510219	1.83542
	4.67664		0.050036	0.0470785		6.79817	0.050036	0.0470785	0.0332765	0.0408347	0.668496	0.0122449	0.0165169	0.0188173	0.0520077	1.80814
	4.53337		0.0230893	0.0520077		6.83629	0.0230893	0.0520077	0.025061	0.0529936	0.662252	0.0152025	0.0115877	0.0194745	0.0510219	1.77397
	4.43149		0.038863	0.0460926		6.90431	0.038863	0.0460926	0.00665838	0.056937	0.650422	0.0132308	0.00830147	0.0230893	0.0510219	1.75622
	4.37432		0.0414919	0.0303189		6.92436	0.0414919	0.0303189	0.00830147	0.0497074	0.633991	0.0106018	0.006987	0.0230893	0.0523364	1.73618
	4.31779		0.0598946	0.0142166		6.91089	0.0598946	0.0142166	0.00764424	0.0359054	0.61756	0.00797285	0.00797285	0.0227607	0.0552939	1.71317
	4.30038		0.0697531	0.0152025		6.93586	0.0697531	0.0152025	0.0135594	0.0299903	0.60573	0.0106018	0.00895871	0.025061	0.0556225	1.6675
	4.33718		0.0602232	0.0188173		7.01013	0.0602232	0.0188173	0.0230893	0.0313048	0.5939	0.011259	0.00961595	0.0263755	0.0552939	1.64121
	4.373		0.0263755	0.0237465		7.08768	0.0263755	0.0237465	0.0280186	0.0372199	0.571225	0.011259	0.013888	0.0270327	0.0539794	1.61557
	4.42624		0.031962	0.0267041		7.14157	0.031962	0.0267041	0.025061	0.0424778	0.553808	0.0125735	0.0155311	0.0280186	0.0549653	1.5883
	4.39798		0.0270327	0.0194745		7.18659	0.0270327	0.0194745	0.0194745	0.0483929	0.552165	0.0119163	0.0145452	0.0286758	0.0539794	1.54328
	4.37694		0.0805975	0.011259		7.19678	0.0805975	0.011259	0.0168456	0.0506933	0.540006	0.00863009	0.0119163	0.0299903	0.0552939	1.52027
	4.42131		0.15618	0.0161883		7.19251	0.15618	0.0161883	0.0158597	0.0536508	0.523575	0.00600114	0.0145452	0.0326192	0.0566084	1.50319
	4.41309		0.163081	0.0280186		7.17936	0.163081	0.0280186	0.0280186	0.0559512	0.514374	0.00435805	0.0152025	0.0316334	0.0549653	1.48643
	4.41474		0.145993	0.0296617		7.23457	0.145993	0.0296617	0.0398489	0.0562798	0.510431	0.00435805	0.0152025	0.0290044	0.0533222	1.43943
	4.42525		0.110173	0.0227607		7.2878	0.110173	0.0227607	0.0382058	0.0556225	0.502215	0.00468667	0.0129021	0.0260469	0.0549653	1.40526
	4.38746		0.0290044	0.0161883		7.35648	0.0290044	0.0161883	0.0306475	0.0559512	0.498929	0.00665838	0.00928733	0.0253896	0.0549653	1.38357
	4.34737		0.0493788	0.0237465		7.4038	0.0493788	0.0237465	0.0227607	0.0562798	0.490713	0.00863009	0.0109304	0.0240752	0.0510219	1.36845
	4.28953		0.036234	0.0270327		7.38442	0.036234	0.0270327	0.0194745	0.0543081	0.486441	0.00830147	0.0132308	0.0247324	0.0497074	1.33329
	4.2685		0.06811	0.0263755		7.37752	0.06811	0.0263755	0.0257183	0.0506933	0.472968	0.00304358	0.0168456	0.0237465	0.0523364	1.29747
	4.30991		0.14665	0.0267041		7.40512	0.14665	0.0267041	0.0293331	0.0418206	0.458509	0.0017291	0.0171742	0.0230893	0.0546367	1.26987
	4.31451		0.161766	0.0198031		7.41958	0.161766	0.0198031	0.0247324	0.0336051	0.449308	0.00370081	0.0145452	0.0211176	0.0520077	1.24982
	4.27639		0.088813	0.0142166		7.45802	0.088813	0.0142166	0.0194745	0.0257183	0.449636	0.00435805	0.0106018	0.0178314	0.0480643	1.23175
	4.25437		0.0487216	0.0142166		7.50272	0.0487216	0.0142166	0.0115877	0.0240752	0.448322	0.00895871	0.00435805	0.020789	0.0428064	1.22123
	4.24024		0.0608804	0.0221035		7.55431	0.0608804	0.0221035	0.0122449	0.031962	0.445035	0.0102732	0.00337219	0.025061	0.0428064	1.2094
	4.20968		0.0753397	0.0286758		7.60097	0.0753397	0.0286758	0.0184886	0.0316334	0.43912	0.011259	0.00567252	0.0253896	0.0454354	1.19593
	4.1709		0.0789545	0.0296617		7.66406	0.0789545	0.0296617	0.0260469	0.0375485	0.430248	0.0135594	0.00271496	0.0293331	0.0483929	1.18048
	4.10124		0.0631808	0.0247324		7.65486	0.0631808	0.0247324	0.0270327	0.0424778	0.419403	0.00961595	0.00830147	0.0303189	0.0523364	1.14039
	4.02927		0.0671242	0.0214462		7.62266	0.0671242	0.0214462	0.025061	0.0428064	0.413488	0.006987	0.0102732	0.0286758	0.0549653	1.12232
	3.99542		0.0953854	0.0230893		7.60984	0.0953854	0.0230893	0.0237465	0.034591	0.399358	0.00435805	0.00928733	0.0270327	0.0582515	1.1049
	3.97406		0.119375	0.0168456		7.63449	0.119375	0.0168456	0.0336051	0.0293331	0.392785	0.00337219	0.0106018	0.0260469	0.0598946	1.0888
	3.96092		0.120032	0.0142166		7.64599	0.120032	0.0142166	0.0368913	0.0290044	0.386541	0.00632976	0.0115877	0.0230893	0.0579229	1.06481
	3.95566		0.119703	0.0237465		7.66308	0.119703	0.0237465	0.0313048	0.0273613	0.385884	0.00435805	0.0125735	0.0175028	0.0552939	1.05298
	3.99279		0.182141	0.0326192		7.66571	0.182141	0.0326192	0.0293331	0.0332765	0.382598	0.0017291	0.0125735	0.0142166	0.0523364	1.04181
	4.07725		0.201201	0.0286758		7.69495	0.201201	0.0286758	0.0214462	0.0464212	0.368796	0.000743246	0.0135594	0.0158597	0.0454354	1.03491
	4.13147		0.111816	0.0184886		7.74983	0.111816	0.0184886	0.0135594	0.0536508	0.359923	0.00238634	0.0129021	0.0184886	0.0444495	1.01125
	4.11077		0.0428064	0.0221035		7.77579	0.0428064	0.0221035	0.0102732	0.0480643	0.352365	0.00370081	0.0145452	0.0224321	0.0447781	0.994486
	4.08316		0.0102732	0.02769		7.78302	0.0102732	0.02769	0.011259	0.0418206	0.343492	0.00402943	0.0171742	0.0257183	0.045764	0.973125
	3.98655		0.0267041	0.0355768		7.77842	0.0267041	0.0355768	0.0194745	0.0441209	0.337906	0.00271496	0.0178314	0.0260469	0.045764	0.948808
	3.95402		0.0579229	0.031962		7.79354	0.0579229	0.031962	0.0148738	0.0424778	0.330676	0.00600114	0.0184886	0.0240752	0.0437923	0.926462
	3.94514		0.128576	0.0299903		7.81128	0.128576	0.0299903	0.00402943	0.0411633	0.333962	0.00665838	0.0152025	0.0221035	0.0421492	0.920546
	3.90341		0.10623	0.0375485		7.85992	0.10623	0.0375485	0.0125735	0.0411633	0.338234	0.00501529	0.011259	0.0224321	0.0470785	0.910359
	3.89684		0.0874985	0.034591		7.92432	0.0874985	0.034591	0.0135594	0.0395202	0.32739	0.00205772	0.00928733	0.0224321	0.0503646	0.900829
	3.86825		0.113459	0.031962		7.98216	0.113459	0.031962	0.0129021	0.0352482	0.314245	0.00402943	0.006987	0.0194745	0.0513505	0.891628
	3.87975		0.133834	0.0257183		7.9884	0.133834	0.0257183	0.0158597	0.0273613	0.31556	0.00501529	0.00435805	0.0201317	0.0513505	0.87914
	3.87153		0.126933	0.0188173		7.97887	0.126933	0.0188173	0.0191459	0.0184886	0.318517	0.00402943	0.00370081	0.0188173	0.0474071	0.860738
	3.82224		0.103272	0.00567252		7.95193	0.103272	0.00567252	0.0237465	0.0184886	0.31556	0.00600114	0.00928733	0.0204604	0.0444495	0.844307
	3.83637		0.0411633	0.0109304		7.91939	0.0411633	0.0109304	0.0230893	0.020789	0.313917	0.00994457	0.0115877	0.0253896	0.0434637	0.815389
	3.88303		0.0355768	0.0230893		7.88489	0.0355768	0.0230893	0.0168456	0.0240752	0.317532	0.00961595	0.011259	0.0280186	0.0460926	0.805859
	3.83867		0.0769827	0.0368913		7.89541	0.0769827	0.0368913	0.0171742	0.0234179	0.323118	0.00797285	0.0135594	0.0283472	0.0470785	0.802901
	3.81567		0.0746824	0.0454354		7.93287	0.0746824	0.0454354	0.0148738	0.0253896	0.32739	0.00435805	0.0158597	0.0267041	0.0483929	0.799286
	3.81731		0.0786258	0.0329479		7.9999	0.0786258	0.0329479	0.0119163	0.0316334	0.330348	0.00140048	0.0198031	0.025061	0.0520077	0.788113
	3.82684		0.136134	0.0204604		8.04492	0.136134	0.0204604	0.0148738	0.0303189	0.324104	0.006987	0.0237465	0.0240752	0.0536508	0.777269
	3.83374		0.162752	0.0217748		8.09159	0.162752	0.0217748	0.0125735	0.0309762	0.316546	0.00863009	0.0211176	0.0247324	0.0562798	0.764453
	3.76769		0.145664	0.0227607		8.11623	0.145664	0.0227607	0.00895871	0.0336051	0.313259	0.006987	0.0148738	0.0260469	0.0585801	0.750651
	3.66779		0.136134	0.0201317		8.1044	0.136134	0.0201317	0.0188173	0.0299903	0.308002	0.00567252	0.0142166	0.025061	0.0562798	0.731591
	3.63493		0.138434	0.0191459		8.10309	0.138434	0.0191459	0.0286758	0.0263755	0.297814	0.00928733	0.0175028	0.0237465	0.0523364	0.723047
	3.58071		0.14895	0.0224321		8.13726	0.14895	0.0224321	0.0359054	0.0286758	0.291242	0.00961595	0.0224321	0.0257183	0.0444495	0.720746
	3.57545		0.10853	0.0211176		8.16881	0.10853	0.0211176	0.0299903	0.0306475	0.291242	0.00731562	0.0280186	0.0286758	0.0408347	0.713188
	3.57282		0.0359054	0.0296617		8.20265	0.0359054	0.0296617	0.0188173	0.0378771	0.291242	0.00435805	0.0299903	0.0280186	0.0428064	0.701029
	3.57578		0.0802689	0.031962		8.25162	0.0802689	0.031962	0.0198031	0.0418206	0.289928	0.00304358	0.0270327	0.0237465	0.0454354	0.679012
	3.56986		0.139749	0.0283472		8.30584	0.139749	0.0283472	0.0214462	0.0428064	0.28927	0.00402943	0.0234179	0.0253896	0.0464212	0.666853
	3.55245		0.141063	0.0299903		8.32884	0.141063	0.0299903	0.0257183	0.0339337	0.283027	0.00435805	0.0201317	0.025061	0.045764	0.657323
	3.54259		0.130219	0.034591		8.29368	0.130219	0.034591	0.0296617	0.0224321	0.273497	0.00665838	0.0168456	0.0263755	0.0444495	0.654037
	3.57118		0.101958	0.0257183		8.23683	0.101958	0.0257183	0.0329479	0.0214462	0.272839	0.00567252	0.0125735	0.0283472	0.045764	0.641878
	3.5623		0.100643	0.0152025		8.22402	0.100643	0.0152025	0.0336051	0.0263755	0.28467	0.00600114	0.00863009	0.0257183	0.0506933	0.633005
	3.52681		0.0996574	0.00731562		8.2572	0.0996574	0.00731562	0.0253896	0.0336051	0.2988	0.00863009	0.00863009	0.0217748	0.0533222	0.622818
	3.5462		0.10623	0.00731562		8.32095	0.10623	0.00731562	0.0253896	0.0372199	0.305044	0.00961595	0.0148738	0.0201317	0.0516791	0.608688
	3.54817		0.0631808	0.0106018		8.34691	0.0631808	0.0106018	0.0273613	0.0487216	0.299129	0.00764424	0.0158597	0.0168456	0.0513505	0.58897
	3.51696		0.0221035	0.0152025		8.31603	0.0221035	0.0152025	0.0303189	0.0546367	0.294528	0.00764424	0.0125735	0.0171742	0.0503646	0.578455
	3.52386		0.0401775	0.0175028		8.28021	0.0401775	0.0175028	0.0260469	0.0520077	0.292228	0.006987	0.00468667	0.0191459	0.0523364	0.568267
	3.49264		0.0359054	0.0230893		8.2273	0.0359054	0.0230893	0.0201317	0.0418206	0.288284	0.00600114	0.00994457	0.0201317	0.0562798	0.560381
	3.45682		0.0385344	0.0290044		8.22566	0.0385344	0.0290044	0.0161883	0.036234	0.285984	0.00731562	0.0115877	0.0214462	0.0572656	0.552822
	3.45846		0.0257183	0.0270327		8.26641	0.0257183	0.0270327	0.0198031	0.0326192	0.28697	0.00304358	0.006987	0.020789	0.0572656	0.551179
	3.43283		0.0332765	0.0211176		8.28284	0.0332765	0.0211176	0.0158597	0.031962	0.295514	0.00205772	0.0109304	0.0194745	0.0602232	0.546907
	3.44499		0.0631808	0.0142166		8.29631	0.0631808	0.0142166	0.0132308	0.0405061	0.299129	0.0017291	0.0152025	0.0175028	0.0605518	0.537049
	3.49592		0.0497074	0.0106018		8.27725	0.0497074	0.0106018	0.0119163	0.0451067	0.28927	0.00205772	0.0148738	0.0178314	0.0510219	0.518975
	3.52254		0.0421492	0.011259		8.25885	0.0421492	0.011259	0.0102732	0.0421492	0.279412	0.00370081	0.0142166	0.0165169	0.0460926	0.509773
	3.50611		0.103929	0.0102732		8.26148	0.103929	0.0102732	0.0161883	0.0424778	0.274482	0.00337219	0.0122449	0.0158597	0.0454354	0.501886
	3.41278		0.217303	0.0109304		8.27758	0.217303	0.0109304	0.0198031	0.0437923	0.274811	0.00370081	0.00830147	0.0198031	0.0434637	0.494986
	3.38715		0.231105	0.00863009		8.30485	0.231105	0.00863009	0.0201317	0.0414919	0.276126	0.00238634	0.00863009	0.025061	0.0441209	0.490385
	3.42396		0.211716	0.00895871		8.31471	0.211716	0.00895871	0.0234179	0.0378771	0.268567	0.00205772	0.006987	0.0267041	0.0474071	0.487427
	3.48015		0.194628	0.0171742		8.31668	0.194628	0.0171742	0.0224321	0.0332765	0.258052	0.00468667	0.00994457	0.025061	0.0467498	0.484798
	3.49001		0.143692	0.0191459		8.34199	0.143692	0.0191459	0.0158597	0.031962	0.258709	0.00797285	0.0132308	0.0198031	0.045764	0.482498
	3.45386		0.112145	0.00895871		8.3364	0.112145	0.00895871	0.00632976	0.0339337	0.259037	0.0106018	0.0129021	0.0191459	0.0434637	0.468696
	3.40687		0.130876	0.00764424		8.32457	0.130876	0.00764424	0.0115877	0.0326192	0.265281	0.00994457	0.00928733	0.0188173	0.0414919	0.459823
	3.38321		0.140406	0.00830147		8.32391	0.140406	0.00830147	0.0152025	0.0267041	0.262324	0.00797285	0.0106018	0.0214462	0.0447781	0.457194
	3.37006		0.163738	0.0230893		8.33443	0.163738	0.0230893	0.0122449	0.0230893	0.25838	0.00665838	0.0142166	0.0260469	0.0490502	0.457852
	3.34805		0.171625	0.0322906		8.40081	0.171625	0.0322906	0.0129021	0.0217748	0.255423	0.00402943	0.0152025	0.0280186	0.0503646	0.447993
	3.34936		0.143692	0.0342623		8.49314	0.143692	0.0342623	0.0152025	0.0280186	0.253122	0.00140048	0.0129021	0.0263755	0.0536508	0.438463
	3.34016		0.187399	0.0391916		8.49249	0.187399	0.0391916	0.0161883	0.034591	0.256737	0.00238634	0.0115877	0.0237465	0.0536508	0.434848
	3.24453		0.195614	0.0395202		8.49183	0.195614	0.0395202	0.0165169	0.0332765	0.259037	0.00238634	0.0106018	0.0198031	0.0523364	0.427619
	3.20083		0.153222	0.0372199		8.5076	0.153222	0.0372199	0.0119163	0.031962	0.266924	0.00435805	0.0109304	0.0204604	0.0523364	0.41546
	3.19261		0.0582515	0.038863		8.46291	0.0582515	0.038863	0.00567252	0.0316334	0.272182	0.00468667	0.00961595	0.020789	0.0510219	0.3987
	3.19623		0.050036	0.0382058		8.44385	0.050036	0.0382058	0.00370081	0.0273613	0.272511	0.00370081	0.0109304	0.0234179	0.0493788	0.388184
	3.25768		0.0881558	0.0332765		8.4708	0.0881558	0.0332765	0.00731562	0.0260469	0.273497	0.00238634	0.0106018	0.0263755	0.050036	0.381612
	3.30796		0.0799403	0.0230893		8.47606	0.0799403	0.0230893	0.00928733	0.0244038	0.268239	0.00402943	0.0102732	0.0221035	0.0533222	0.378655
	3.32997		0.0674528	0.0122449		8.44385	0.0674528	0.0122449	0.00961595	0.0227607	0.256737	0.00632976	0.00895871	0.0198031	0.0516791	0.383912
	3.32011		0.0520077	0.00567252		8.42742	0.0520077	0.00567252	0.011259	0.025061	0.247864	0.00402943	0.00501529	0.0214462	0.0510219	0.389828
	3.3257		0.0267041	0.0102732		8.40081	0.0267041	0.0102732	0.00863009	0.0257183	0.250493	0.00271496	0.00501529	0.0217748	0.0539794	0.395743
	3.36053		0.0878272	0.0188173		8.38109	0.0878272	0.0188173	0.00863009	0.0293331	0.249507	0.00435805	0.00632976	0.0198031	0.0566084	0.3941
	3.34772		0.0769827	0.0224321		8.40475	0.0769827	0.0224321	0.0109304	0.0336051	0.254437	0.00468667	0.00304358	0.0188173	0.0579229	0.373397
	3.32274		0.0483929	0.0161883		8.41001	0.0483929	0.0161883	0.0217748	0.0355768	0.263638	0.006987	0.00468667	0.01816	0.0552939	0.358609
	3.3188		0.0759969	0.0161883		8.42907	0.0759969	0.0161883	0.0230893	0.0339337	0.266924	0.00994457	0.00797285	0.0194745	0.0536508	0.34645
	3.30434		0.10623	0.0332765		8.48559	0.10623	0.0332765	0.0188173	0.0306475	0.269225	0.0102732	0.0122449	0.0227607	0.0562798	0.338563
	3.27345		0.117731	0.031962		8.55722	0.117731	0.031962	0.0178314	0.031962	0.269553	0.00961595	0.01816	0.0237465	0.0602232	0.335934
	3.29251		0.0766541	0.0293331		8.55262	0.0766541	0.0293331	0.0198031	0.0283472	0.270539	0.00895871	0.0198031	0.0283472	0.063838	0.334948
	3.36776		0.050036	0.0260469		8.54671	0.050036	0.0260469	0.0221035	0.0148738	0.267253	0.00830147	0.0214462	0.0316334	0.0628522	0.33462
	3.35199		0.0828979	0.0359054		8.54047	0.0828979	0.0359054	0.0188173	0.0148738	0.264953	0.00731562	0.0260469	0.0299903	0.063838	0.333305
	3.28364		0.070739	0.031962		8.50169	0.070739	0.031962	0.0152025	0.0283472	0.265938	0.00501529	0.0240752	0.0244038	0.0635094	0.32509
	3.20608		0.0855268	0.0270327		8.51089	0.0855268	0.0270327	0.0102732	0.031962	0.264953	0.00600114	0.0194745	0.0198031	0.0644952	0.318846
	3.22449		0.119046	0.0270327		8.52864	0.119046	0.0270327	0.00961595	0.0290044	0.273825	0.00534391	0.0142166	0.020789	0.0658097	0.314903
	3.29251		0.0891416	0.038863		8.48427	0.0891416	0.038863	0.0135594	0.0260469	0.278426	0.00665838	0.00961595	0.0224321	0.0631808	0.310631
	3.31387		0.0480643	0.0326192		8.44845	0.0480643	0.0326192	0.0178314	0.0299903	0.276783	0.0106018	0.00402943	0.0227607	0.0579229	0.30373
	3.29613		0.0109304	0.0313048		8.41724	0.0109304	0.0313048	0.0247324	0.0395202	0.278426	0.0115877	0.00600114	0.0194745	0.0543081	0.306687
	3.27509		0.0615377	0.0306475		8.41691	0.0615377	0.0306475	0.0290044	0.0411633	0.27744	0.0115877	0.00863009	0.01816	0.0483929	0.309316
	3.24026		0.0990002	0.0253896		8.47639	0.0990002	0.0253896	0.0283472	0.0418206	0.272839	0.0135594	0.00961595	0.01816	0.0428064	0.309973
	3.26162		0.0976857	0.0184886		8.51943	0.0976857	0.0184886	0.0244038	0.036234	0.262324	0.0132308	0.0125735	0.0214462	0.0414919	0.308002
	3.27772		0.102944	0.00928733		8.54244	0.102944	0.00928733	0.0224321	0.0303189	0.249179	0.0115877	0.0106018	0.0244038	0.0467498	0.305373
	3.28002		0.14895	0.00271496		8.58286	0.14895	0.00271496	0.0168456	0.0273613	0.242606	0.00961595	0.0115877	0.0253896	0.0493788	0.300772
	3.25833		0.173597	0.006987		8.63839	0.173597	0.006987	0.0125735	0.031962	0.241949	0.00764424	0.0106018	0.0237465	0.0510219	0.296171
	3.1982		0.155851	0.00501529		8.65679	0.155851	0.00501529	0.00961595	0.0322906	0.246879	0.00534391	0.0102732	0.0260469	0.0543081	0.2988
	3.15876		0.122989	0.00797285		8.61572	0.122989	0.00797285	0.00665838	0.0273613	0.254108	0.00468667	0.0109304	0.025061	0.0598946	0.295185
	3.15975		0.0855268	0.011259		8.58351	0.0855268	0.011259	0.0165169	0.0283472	0.255751	0.00665838	0.013888	0.0240752	0.0618663	0.2942
	3.09665		0.0792831	0.006987		8.62327	0.0792831	0.006987	0.0161883	0.0296617	0.251808	0.00764424	0.0188173	0.020789	0.0589087	0.292228
trace_04	5.87839		0.059566	0.00435805		4.39239	0.059566	0.00435805	0.0467498	0.0293331	4.21099	0.0115877	0.00600114	0.02769	0.0605518	4.8163
	5.87707		0.0155311	0.00797285		4.38056	0.0155311	0.00797285	0.0579229	0.0437923	4.18668	0.0152025	0.00501529	0.0257183	0.0598946	4.7795
	5.90829		0.108202	0.0115877		4.39995	0.108202	0.0115877	0.0799403	0.0529936	4.12588	0.0171742	0.00632976	0.0237465	0.0582515	4.73119
	5.93392		0.119046	0.0171742		4.45417	0.119046	0.0171742	0.103929	0.0497074	4.04373	0.0178314	0.006987	0.025061	0.0575943	4.64115
	5.95232		0.100643	0.0227607		4.48966	0.100643	0.0227607	0.0592373	0.0842124	3.95467	0.01816	0.00632976	0.0244038	0.0566084	4.61322
	5.95167		0.070739	0.0329479		4.50773	0.070739	0.0329479	0.0474071	0.100315	3.86365	0.0165169	0.00501529	0.0204604	0.0539794	4.59317
	5.91026		0.0704104	0.0375485		4.58266	0.0704104	0.0375485	0.0743538	0.0786258	3.78018	0.00632976	0.00501529	0.0224321	0.052665	4.57181
	5.91585		0.153879	0.0414919		4.69899	0.153879	0.0414919	0.0799403	0.0575943	3.69145	0.00304358	0.00764424	0.0224321	0.0529936	4.50215
	5.95495		0.176883	0.025061		4.77556	0.176883	0.025061	0.0832265	0.0533222	3.57676	0.00271496	0.00665838	0.020789	0.0552939	4.4545
	6.03086		0.102944	0.01816		4.87973	0.102944	0.01816	0.0759969	0.0401775	3.47029	0.00370081	0.00994457	0.0201317	0.0572656	4.40159
	6.0864		0.0789545	0.01816		4.95597	0.0789545	0.01816	0.0355768	0.050036	3.36316	0.00863009	0.0148738	0.0194745	0.0543081	4.34868
	6.12682		0.0773114	0.0198031		4.99639	0.0773114	0.0198031	0.0290044	0.0513505	3.23237	0.011259	0.01816	0.0221035	0.0529936	4.23038
	6.08015		0.0368913	0.0201317		5.03713	0.0368913	0.0201317	0.0332765	0.0490502	3.0937	0.0125735	0.0188173	0.020789	0.059566	4.15809
	6.04664		0.0763255	0.0145452		5.06309	0.0763255	0.0145452	0.0230893	0.0769827	2.98492	0.013888	0.01816	0.0211176	0.0635094	4.08513
	6.04269		0.0805975	0.0165169		5.07985	0.0805975	0.0165169	0.0214462	0.0868413	2.90408	0.0145452	0.0161883	0.0253896	0.0648239	4.02533
	6.08738		0.0746824	0.0184886		5.13145	0.0746824	0.0184886	0.0280186	0.0835551	2.82094	0.0135594	0.0102732	0.0290044	0.0661383	3.92411
	6.10316		0.0720535	0.0165169		5.1814	0.0720535	0.0165169	0.0411633	0.0835551	2.74602	0.0135594	0.00863009	0.0296617	0.0648239	3.87646
	6.06208		0.056937	0.0191459		5.23759	0.056937	0.0191459	0.0355768	0.0612091	2.68424	0.0122449	0.00928733	0.0290044	0.0615377	3.82093
	5.9842		0.0763255	0.0158597		5.34669	0.0763255	0.0158597	0.0332765	0.0585801	2.60537	0.0135594	0.00994457	0.0270327	0.0592373	3.76276
	5.91651		0.122332	0.01816		5.40551	0.122332	0.01816	0.0460926	0.0648239	2.51664	0.00863009	0.0122449	0.0247324	0.056937	3.66779
	5.81529		0.130548	0.0237465		5.43574	0.130548	0.0237465	0.0635094	0.0418206	2.42562	0.00534391	0.00961595	0.0260469	0.0533222	3.60634
	5.73675		0.137449	0.0184886		5.48569	0.137449	0.0184886	0.0552939	0.031962	2.33689	0.00600114	0.00665838	0.025061	0.0562798	3.54817
	5.63127		0.172611	0.0142166		5.54353	0.172611	0.0142166	0.0313048	0.0283472	2.25704	0.00961595	0.00928733	0.0267041	0.0592373	3.48837
	5.50804		0.17031	0.00402943		5.60991	0.17031	0.00402943	0.00764424	0.00731562	2.17488	0.0161883	0.0148738	0.02769	0.0575943	3.38255
	5.40222		0.126933	0.0184886		5.68582	0.126933	0.0184886	0.0135594	0.00534391	2.0832	0.0178314	0.0165169	0.0293331	0.0543081	3.31256
	5.30101		0.0907847	0.0263755		5.76567	0.0907847	0.0263755	0.0122449	0.00238634	1.97574	0.0161883	0.0145452	0.0260469	0.0556225	3.26392
	5.21491		0.0539794	0.0280186		5.85045	0.0539794	0.0280186	0.0230893	0.0152025	1.87617	0.0122449	0.0142166	0.0224321	0.0543081	3.21594
	5.11271		0.0552939	0.0270327		5.90632	0.0552939	0.0270327	0.0273613	0.045764	1.78843	0.00764424	0.0155311	0.0234179	0.0516791	3.11539
	5.02957		0.07764	0.0204604		5.96383	0.07764	0.0204604	0.0198031	0.059566	1.71219	0.00567252	0.0115877	0.0227607	0.050036	3.0306
	4.99178		0.025061	0.00961595		6.021	0.025061	0.00961595	0.0263755	0.052665	1.64548	0.00337219	0.00797285	0.0237465	0.0533222	2.97375
	4.93066		0.0165169	0.0165169		6.03908	0.0165169	0.0165169	0.0355768	0.0546367	1.58107	0.00140048	0.00764424	0.0244038	0.0556225	2.91953
	4.84621		0.00895871	0.0214462		6.06734	0.00895871	0.0214462	0.0391916	0.0487216	1.51995	0.00895871	0.00731562	0.0253896	0.0523364	2.83573
	4.7979		0.0171742	0.0234179		6.12747	0.0171742	0.0234179	0.0257183	0.0303189	1.45061	0.00797285	0.00961595	0.0270327	0.0480643	2.75325
	4.7772		0.0454354	0.0135594		6.18958	0.0454354	0.0135594	0.0244038	0.0237465	1.39244	0.00534391	0.00928733	0.0293331	0.0467498	2.70264
	4.77654		0.120032	0.00764424		6.24775	0.120032	0.00764424	0.043135	0.0355768	1.33231	0.0017291	0.0109304	0.0309762	0.0477357	2.65499
	4.77063		0.0796117	0.00600114		6.3023	0.0796117	0.00600114	0.056937	0.0437923	1.27808	0.00830147	0.0132308	0.0283472	0.050036	2.61917
	4.72035		0.0405061	0.0142166		6.34272	0.0405061	0.0142166	0.0592373	0.0411633	1.24358	0.00764424	0.0102732	0.0211176	0.0523364	2.58237
	4.6589		0.0168456	0.0152025		6.38741	0.0168456	0.0152025	0.0533222	0.036234	1.2117	0.00665838	0.00830147	0.0184886	0.0523364	2.55312
	4.64082		0.0267041	0.0125735		6.44689	0.0267041	0.0125735	0.0447781	0.0414919	1.1749	0.00797285	0.00764424	0.0178314	0.0529936	2.51599
	4.59942		0.0802689	0.0142166		6.51425	0.0802689	0.0142166	0.0378771	0.0411633	1.15288	0.00961595	0.0125735	0.020789	0.0546367	2.4805
	4.57214		0.124304	0.0191459		6.5205	0.124304	0.0191459	0.0372199	0.0303189	1.12856	0.00961595	0.0109304	0.0234179	0.0572656	2.4128
	4.51924		0.0865127	0.0283472		6.47778	0.0865127	0.0283472	0.0188173	0.034591	1.09899	0.00895871	0.00665838	0.0211176	0.0585801	2.37238
	4.47191		0.0980143	0.0175028		6.44459	0.0980143	0.0175028	0.00961595	0.0441209	1.06514	0.00928733	0.00370081	0.0224321	0.0605518	2.32835
	4.43905		0.0874985	0.00961595		6.46595	0.0874985	0.00961595	0.0175028	0.0503646	1.04115	0.00961595	0.00402943	0.0237465	0.0621949	2.28661
	4.44595		0.0273613	0.0135594		6.5458	0.0273613	0.0135594	0.0204604	0.059566	1.02702	0.00731562	0.00994457	0.0237465	0.0602232	2.2222
	4.48144		0.13942	0.0175028		6.62795	0.13942	0.0175028	0.0142166	0.0694245	0.994486	0.00567252	0.0152025	0.0211176	0.0559512	2.1946
	4.52154		0.149279	0.0175028		6.65621	0.149279	0.0175028	0.0165169	0.0822406	0.957352	0.00304358	0.0171742	0.0224321	0.0579229	2.17587
	4.54618		0.140078	0.0184886		6.6779	0.140078	0.0184886	0.0129021	0.0884844	0.911674	0.00140048	0.0175028	0.0234179	0.0589087	2.15385
	4.57181		0.108859	0.020789		6.69696	0.108859	0.020789	0.025061	0.0773114	0.872568	0.00238634	0.0175028	0.0260469	0.0575943	2.08221
	4.65331		0.11083	0.00928733		6.72686	0.11083	0.00928733	0.0293331	0.0644952	0.843321	0.00534391	0.0198031	0.0280186	0.059566	2.04015
	4.70687		0.134491	0.00271496		6.74724	0.134491	0.00271496	0.0257183	0.0506933	0.814731	0.0102732	0.0175028	0.02769	0.0582515	2.00729
	4.72856		0.145007	0.00337219		6.78733	0.145007	0.00337219	0.0204604	0.0464212	0.792057	0.0142166	0.0152025	0.0263755	0.0543081	1.97607
	4.80842		0.14665	0.00140048		6.85864	0.14665	0.00140048	0.0191459	0.0454354	0.780884	0.0152025	0.0115877	0.025061	0.052665	1.92382
	4.81367		0.104258	0.00402943		6.97727	0.104258	0.00402943	0.0142166	0.0556225	0.769382	0.013888	0.0115877	0.0217748	0.0520077	1.90574
	4.8071		0.0451067	0.00238634		7.05318	0.0451067	0.00238634	0.0198031	0.0621949	0.760509	0.0145452	0.0119163	0.0175028	0.0490502	1.88898
	4.77983		0.0697531	0.0106018		7.06731	0.0697531	0.0106018	0.0175028	0.052665	0.748022	0.0161883	0.00830147	0.0178314	0.0493788	1.8742
	4.7003		0.109187	0.0175028		7.09162	0.109187	0.0175028	0.0217748	0.0421492	0.731919	0.0175028	0.00600114	0.0165169	0.0467498	1.84232
	4.65397		0.138106	0.0240752		7.12711	0.138106	0.0240752	0.0214462	0.0326192	0.723375	0.0152025	0.00534391	0.0227607	0.043135	1.81275
	4.65068		0.112474	0.0349196		7.12679	0.112474	0.0349196	0.0227607	0.0326192	0.710231	0.0119163	0.00632976	0.0309762	0.0434637	1.78711
	4.62275		0.0661383	0.0405061		7.14716	0.0661383	0.0405061	0.0158597	0.0368913	0.700372	0.00895871	0.00731562	0.031962	0.0454354	1.76312
	4.58299		0.0437923	0.034591		7.20171	0.0437923	0.034591	0.0171742	0.0391916	0.683613	0.00468667	0.00895871	0.0309762	0.0467498	1.7089
	4.50248		0.0359054	0.0247324		7.21518	0.0359054	0.0247324	0.0234179	0.0398489	0.660938	0.00402943	0.0115877	0.0286758	0.0483929	1.66125
	4.47356		0.043135	0.0145452		7.2533	0.043135	0.0145452	0.0267041	0.0359054	0.641221	0.00501529	0.0142166	0.0244038	0.0490502	1.63595
	4.49985		0.013888	0.0142166		7.31771	0.013888	0.0142166	0.0283472	0.0299903	0.630705	0.006987	0.0145452	0.0201317	0.0497074	1.61755
	4.49032		0.0188173	0.0158597		7.36897	0.0188173	0.0158597	0.0326192	0.0263755	0.618875	0.00797285	0.0129021	0.0165169	0.0493788	1.58797
	4.4982		0.0503646	0.0165169		7.42221	0.0503646	0.0165169	0.0234179	0.0296617	0.605401	0.00895871	0.0102732	0.0129021	0.050036	1.55872
	4.49262		0.0743538	0.0178314		7.43831	0.0743538	0.0178314	0.0299903	0.0273613	0.586013	0.00928733	0.006987	0.0109304	0.0493788	1.53802
	4.4591		0.0359054	0.0227607		7.44981	0.0359054	0.0227607	0.0375485	0.0188173	0.567939	0.006987	0.00632976	0.00928733	0.0480643	1.51699
	4.45548		0.0641666	0.025061		7.44784	0.0641666	0.025061	0.0332765	0.0171742	0.559395	0.0122449	0.0102732	0.0129021	0.0454354	1.49596
	4.47586		0.0723821	0.0184886		7.47741	0.0723821	0.0184886	0.0286758	0.0145452	0.551508	0.0158597	0.0158597	0.0161883	0.0490502	1.44075
	4.50248		0.0934137	0.0178314		7.49187	0.0934137	0.0178314	0.0194745	0.0198031	0.537049	0.0145452	0.0175028	0.0188173	0.0523364	1.41315
	4.49853		0.091442	0.0142166		7.47117	0.091442	0.0142166	0.013888	0.0273613	0.531462	0.0135594	0.013888	0.0204604	0.0510219	1.38883
	4.43445		0.0861841	0.0148738		7.49253	0.0861841	0.0148738	0.0161883	0.0342623	0.527519	0.0135594	0.0161883	0.0198031	0.0510219	1.37042
	4.36479		0.136791	0.0178314		7.53821	0.136791	0.0178314	0.01816	0.0336051	0.515688	0.0148738	0.0161883	0.0198031	0.0523364	1.35038
	4.38483		0.128247	0.0168456		7.5852	0.128247	0.0168456	0.02769	0.0286758	0.511088	0.013888	0.0158597	0.0201317	0.0516791	1.33921
	4.43412		0.070739	0.0152025		7.64895	0.070739	0.0152025	0.0313048	0.0263755	0.493014	0.0102732	0.0161883	0.0217748	0.0510219	1.32245
	4.45614		0.0444495	0.0204604		7.70843	0.0444495	0.0204604	0.0194745	0.031962	0.480198	0.00501529	0.0129021	0.0224321	0.0516791	1.30306
	4.40126		0.025061	0.0198031		7.69824	0.025061	0.0198031	0.006987	0.0306475	0.476254	0.00534391	0.00994457	0.0237465	0.0510219	1.26001
	4.31254		0.036234	0.0125735		7.66834	0.036234	0.0125735	0.0102732	0.0217748	0.473297	0.00501529	0.00632976	0.0240752	0.0520077	1.23832
	4.27705		0.104258	0.00830147		7.68411	0.104258	0.00830147	0.0158597	0.0244038	0.470996	0.00304358	0.00764424	0.0257183	0.0529936	1.21992
	4.31681		0.0756683	0.0188173		7.67885	0.0756683	0.0188173	0.0267041	0.0365627	0.472968	0.00370081	0.0106018	0.0244038	0.0516791	1.20414
	4.31517		0.0329479	0.0178314		7.71138	0.0329479	0.0178314	0.0372199	0.0451067	0.467382	0.00567252	0.0145452	0.025061	0.0503646	1.17555
	4.28428		0.0566084	0.0234179		7.76166	0.0566084	0.0234179	0.0395202	0.0460926	0.455551	0.00600114	0.0161883	0.0257183	0.0539794	1.1634
	4.30991		0.084541	0.0230893		7.79025	0.084541	0.0230893	0.0296617	0.0424778	0.443721	0.00731562	0.0155311	0.0260469	0.0552939	1.14762
	4.32798		0.0733679	0.0184886		7.83888	0.0733679	0.0184886	0.0227607	0.0372199	0.439778	0.00928733	0.0142166	0.02769	0.0529936	1.12725
	4.34244		0.0651525	0.0142166		7.89311	0.0651525	0.0142166	0.0201317	0.0322906	0.434191	0.00961595	0.0122449	0.0286758	0.0497074	1.09439
	4.38943		0.0539794	0.00731562		7.92038	0.0539794	0.00731562	0.0198031	0.0283472	0.428276	0.00928733	0.00895871	0.0309762	0.0467498	1.08058
	4.38877		0.0510219	0.00402943		7.95883	0.0510219	0.00402943	0.0178314	0.0342623	0.421375	0.00895871	0.00764424	0.0303189	0.045764	1.06152
	4.40061		0.0782972	0.00961595		7.98742	0.0782972	0.00961595	0.0132308	0.0451067	0.408887	0.00895871	0.00863009	0.0303189	0.0437923	1.04148
	4.35887		0.112474	0.0171742		8.00878	0.112474	0.0171742	0.00665838	0.050036	0.398372	0.0109304	0.00567252	0.0283472	0.0470785	1.01716
	4.2915		0.0792831	0.01816		8.04361	0.0792831	0.01816	0.00435805	0.0543081	0.388513	0.0115877	0.00797285	0.02769	0.0539794	1.00664
	4.25569		0.0303189	0.0175028		8.05478	0.0303189	0.0175028	0.0165169	0.0516791	0.37964	0.0135594	0.0102732	0.0263755	0.0579229	0.994814
	4.25601		0.0687673	0.0188173		8.08337	0.0687673	0.0188173	0.025061	0.0493788	0.376683	0.0122449	0.00863009	0.0240752	0.0566084	0.979698
	4.25897		0.10853	0.0194745		8.08238	0.10853	0.0194745	0.0234179	0.0424778	0.373068	0.0125735	0.00764424	0.0230893	0.0510219	0.967539
	4.17517		0.157166	0.0283472		8.0699	0.157166	0.0283472	0.0171742	0.0306475	0.374054	0.0152025	0.0106018	0.0237465	0.0477357	0.96261
	4.08053		0.17524	0.0316334		8.07943	0.17524	0.0316334	0.0109304	0.0230893	0.378326	0.0119163	0.0142166	0.0247324	0.045764	0.952422
	4.06312		0.17031	0.0322906		8.14778	0.17031	0.0322906	0.0155311	0.0198031	0.377011	0.00830147	0.0161883	0.0227607	0.0470785	0.936977
	4.0158		0.150265	0.02769		8.13036	0.150265	0.02769	0.0191459	0.0109304	0.36781	0.00863009	0.0142166	0.0217748	0.0460926	0.922847
	3.99608		0.0786258	0.0306475		8.12083	0.0786258	0.0306475	0.0211176	0.00468667	0.359595	0.00830147	0.0171742	0.020789	0.0460926	0.906744
	3.94021		0.0664669	0.0385344		8.12445	0.0664669	0.0385344	0.0165169	0.0178314	0.355651	0.00797285	0.0191459	0.0214462	0.0493788	0.8959
	3.96092		0.0618663	0.0408347		8.17045	0.0618663	0.0408347	0.0204604	0.0240752	0.351708	0.00764424	0.0201317	0.0221035	0.0533222	0.882427
	3.96979		0.0451067	0.036234		8.21153	0.0451067	0.036234	0.0280186	0.0267041	0.354337	0.00731562	0.0194745	0.0211176	0.0549653	0.863695
	3.96322		0.0516791	0.0326192		8.2066	0.0516791	0.0326192	0.0270327	0.0316334	0.359266	0.00830147	0.0168456	0.0217748	0.0539794	0.828205
	3.9711		0.0536508	0.01816		8.21613	0.0536508	0.01816	0.0214462	0.0349196	0.358937	0.006987	0.0142166	0.0211176	0.0510219	0.813088
	3.9527		0.0543081	0.0122449		8.2365	0.0543081	0.0122449	0.0161883	0.0280186	0.354337	0.00534391	0.0102732	0.0188173	0.0480643	0.803558
	3.95434		0.0536508	0.00764424		8.2388	0.0536508	0.00764424	0.0168456	0.0178314	0.339878	0.00731562	0.00830147	0.0234179	0.0477357	0.796329
	3.94547		0.0828979	0.00863009		8.24932	0.0828979	0.00863009	0.0198031	0.0194745	0.326733	0.00731562	0.00895871	0.02769	0.0513505	0.783184
	3.92806		0.063838	0.0221035		8.28086	0.063838	0.0221035	0.0240752	0.0273613	0.322132	0.00534391	0.00994457	0.0263755	0.0516791	0.776612
	3.92083		0.0411633	0.0178314		8.26542	0.0411633	0.0178314	0.0247324	0.0303189	0.318189	0.00337219	0.0102732	0.0240752	0.0467498	0.771682
	3.8482		0.0352482	0.0184886		8.21383	0.0352482	0.0184886	0.0237465	0.0329479	0.32016	0.00863009	0.0106018	0.0237465	0.0437923	0.767082
	3.80515		0.00665838	0.0306475		8.21909	0.00665838	0.0306475	0.0214462	0.0391916	0.32509	0.00994457	0.0106018	0.0224321	0.0414919	0.749336
	3.79825		0.0552939	0.01816		8.24998	0.0552939	0.01816	0.0260469	0.0451067	0.32509	0.00928733	0.00863009	0.0198031	0.0444495	0.736849
	3.77623		0.0858554	0.0125735		8.29729	0.0858554	0.0125735	0.0283472	0.0474071	0.32509	0.00764424	0.00665838	0.0184886	0.0470785	0.726333
	3.73319		0.137449	0.00731562		8.33344	0.137449	0.00731562	0.0263755	0.0411633	0.326076	0.00271496	0.00961595	0.0178314	0.0487216	0.717789
	3.67502		0.152236	0.00830147		8.35546	0.152236	0.00830147	0.020789	0.036234	0.323118	0.00435805	0.00895871	0.01816	0.0539794	0.698072
	3.69079		0.16571	0.00632976		8.36203	0.16571	0.00632976	0.01816	0.031962	0.316874	0.00632976	0.00928733	0.0178314	0.0562798	0.68427
	3.72136		0.234062	0.00830147		8.37682	0.234062	0.00830147	0.0158597	0.0257183	0.313588	0.00665838	0.0109304	0.0165169	0.0572656	0.67244
	3.67568		0.225518	0.00961595		8.39653	0.225518	0.00961595	0.0129021	0.0313048	0.313259	0.00665838	0.0148738	0.0161883	0.0543081	0.661266
	3.63033		0.214017	0.0102732		8.41789	0.214017	0.0102732	0.00764424	0.034591	0.312931	0.00567252	0.0135594	0.0168456	0.0536508	0.636949
	3.64807		0.204487	0.0184886		8.39883	0.204487	0.0184886	0.00370081	0.0398489	0.316217	0.00402943	0.0119163	0.0198031	0.0566084	0.622161
	3.65662		0.16078	0.0270327		8.43071	0.16078	0.0270327	0.00435805	0.0382058	0.324432	0.0017291	0.0122449	0.0214462	0.0579229	0.607702
	3.64052		0.141392	0.0316334		8.4294	0.141392	0.0316334	0.00632976	0.0299903	0.323118	0.00107186	0.0109304	0.0214462	0.0582515	0.595543
	3.61357		0.117403	0.0260469		8.42414	0.117403	0.0260469	0.00402943	0.0257183	0.312602	0.00271496	0.0115877	0.0194745	0.0589087	0.580755
	3.59221		0.0822406	0.0194745		8.46127	0.0822406	0.0194745	0.00468667	0.0326192	0.312931	0.00370081	0.0148738	0.0184886	0.0575943	0.572211
	3.57151		0.0934137	0.0260469		8.47836	0.0934137	0.0260469	0.0135594	0.0391916	0.305373	0.00370081	0.0165169	0.0224321	0.0598946	0.563667
	3.55343		0.0792831	0.0267041		8.48394	0.0792831	0.0267041	0.0217748	0.0395202	0.2988	0.00632976	0.0148738	0.0263755	0.059566	0.559066
	3.57216		0.0598946	0.0313048		8.50399	0.0598946	0.0313048	0.0237465	0.0437923	0.28927	0.00731562	0.0135594	0.0309762	0.0592373	0.549865
	3.61225		0.0743538	0.0316334		8.53948	0.0743538	0.0316334	0.0214462	0.0428064	0.284012	0.00665838	0.0106018	0.0326192	0.0536508	0.546907
	3.53799		0.0884844	0.0322906		8.54835	0.0884844	0.0322906	0.0148738	0.0336051	0.28467	0.00764424	0.00961595	0.0280186	0.050036	0.545264
	3.4463		0.07764	0.0303189		8.5099	0.07764	0.0303189	0.0142166	0.0214462	0.285984	0.00797285	0.00895871	0.0240752	0.050036	0.544936
	3.4026		0.0582515	0.0283472		8.46061	0.0582515	0.0283472	0.0204604	0.0198031	0.28697	0.0125735	0.00895871	0.0230893	0.0503646	0.538363
	3.41443		0.0773114	0.0198031		8.47244	0.0773114	0.0198031	0.0184886	0.0257183	0.284341	0.0158597	0.00665838	0.0237465	0.0510219	0.531134
	3.41607		0.0835551	0.00863009		8.46981	0.0835551	0.00863009	0.0240752	0.0253896	0.278097	0.0171742	0.00205772	0.0263755	0.0523364	0.525547
	3.4118		0.0858554	0.00863009		8.49314	0.0858554	0.00863009	0.0299903	0.0247324	0.275468	0.0165169	0.00337219	0.0293331	0.0474071	0.517332
	3.37927		0.0891416	0.00764424		8.50432	0.0891416	0.00764424	0.031962	0.025061	0.275797	0.00994457	0.00928733	0.0306475	0.0444495	0.509445
	3.35495		0.0966999	0.0115877		8.54047	0.0966999	0.0115877	0.0299903	0.0240752	0.277111	0.00600114	0.0152025	0.0299903	0.0437923	0.50583
	3.3533		0.0786258	0.0115877		8.57135	0.0786258	0.0115877	0.0293331	0.0191459	0.280398	0.00501529	0.013888	0.0273613	0.0414919	0.506816
	3.41443		0.0621949	0.00271496		8.61604	0.0621949	0.00271496	0.0253896	0.0158597	0.287627	0.00370081	0.0102732	0.0263755	0.0382058	0.506487
	3.42659		0.0188173	0.00468667		8.642	0.0188173	0.00468667	0.0178314	0.0221035	0.294528	0.00665838	0.00632976	0.0253896	0.036234	0.502544
	3.40095		0.0313048	0.00665838		8.64989	0.0313048	0.00665838	0.0168456	0.0198031	0.296829	0.00731562	0.00665838	0.0240752	0.0401775	0.48447
	3.38814		0.0447781	0.00928733		8.62393	0.0447781	0.00928733	0.0168456	0.0230893	0.295843	0.00567252	0.00830147	0.0253896	0.0487216	0.472639
	3.42231		0.070739	0.0171742		8.59567	0.070739	0.0171742	0.013888	0.0230893	0.295514	0.00337219	0.00797285	0.0247324	0.0493788	0.463767
	3.39701		0.0539794	0.0175028		8.57497	0.0539794	0.0175028	0.0106018	0.0263755	0.291571	0.00304358	0.006987	0.0240752	0.0474071	0.45358
	3.39011		0.0299903	0.0155311		8.59929	0.0299903	0.0155311	0.0106018	0.0273613	0.277769	0.00501529	0.00830147	0.0201317	0.0480643	0.43912
	3.42264		0.0296617	0.0106018		8.64398	0.0296617	0.0106018	0.00468667	0.0280186	0.269882	0.00665838	0.00665838	0.0211176	0.0477357	0.439449
	3.41278		0.0414919	0.0152025		8.70181	0.0414919	0.0152025	0.0125735	0.0234179	0.266924	0.00797285	0.00863009	0.0237465	0.0464212	0.435506
	3.36316		0.0411633	0.020789		8.72481	0.0411633	0.020789	0.0191459	0.020789	0.264953	0.00895871	0.00600114	0.0237465	0.0464212	0.427947
	3.29547		0.0326192	0.031962		8.69984	0.0326192	0.031962	0.0188173	0.0267041	0.267581	0.0109304	0.00402943	0.0230893	0.0516791	0.422689
	3.29087		0.0194745	0.0483929		8.65383	0.0194745	0.0483929	0.0191459	0.0299903	0.26561	0.0125735	0.00501529	0.0191459	0.0549653	0.417103
	3.34443		0.0352482	0.0490502		8.63116	0.0352482	0.0490502	0.0191459	0.0260469	0.262981	0.0119163	0.00238634	0.0158597	0.0579229	0.40593
	3.36612		0.0339337	0.0434637		8.65121	0.0339337	0.0434637	0.0148738	0.0296617	0.266924	0.00961595	0.00304358	0.0158597	0.0543081	0.394757
	3.37762		0.0454354	0.0359054		8.7212	0.0454354	0.0359054	0.0125735	0.0336051	0.273497	0.00435805	0.00468667	0.0168456	0.0529936	0.384898
	3.40358		0.0756683	0.0332765		8.78068	0.0756683	0.0332765	0.00797285	0.0368913	0.278426	0.0017291	0.00468667	0.0188173	0.0520077	0.383912
	3.40884		0.127261	0.0326192		8.76458	0.127261	0.0326192	0.006987	0.0411633	0.288613	0.00107186	0.00665838	0.020789	0.0474071	0.382927
	3.41081		0.126604	0.0267041		8.79711	0.126604	0.0267041	0.0109304	0.0378771	0.293542	0.00205772	0.0106018	0.0224321	0.0428064	0.380626
	3.35133		0.122332	0.0161883		8.81945	0.122332	0.0161883	0.0115877	0.0322906	0.299786	0.00107186	0.00961595	0.0214462	0.038863	0.371754
	3.30697		0.127261	0.0198031		8.85494	0.127261	0.0198031	0.0175028	0.0253896	0.299786	0.00238634	0.00863009	0.0194745	0.0382058	0.363209
	3.34246		0.0970285	0.0152025		8.87532	0.0970285	0.0152025	0.0165169	0.0188173	0.2965	0.00468667	0.0102732	0.0204604	0.0401775	0.356637
	3.37466		0.147964	0.00140048		8.85067	0.147964	0.00140048	0.0191459	0.020789	0.295185	0.00567252	0.0102732	0.0194745	0.045764	0.351708
	3.351		0.181483	0.0142166		8.86546	0.181483	0.0142166	0.0217748	0.0244038	0.2942	0.00632976	0.00961595	0.020789	0.0510219	0.343492
	3.38551		0.134162	0.0309762		8.89339	0.134162	0.0309762	0.0247324	0.0316334	0.298143	0.00731562	0.0115877	0.0211176	0.0533222	0.336591
	3.39898		0.0980143	0.0372199		8.88353	0.0980143	0.0372199	0.0293331	0.0342623	0.296829	0.00764424	0.0109304	0.0221035	0.050036	0.333962
	3.3188		0.0421492	0.0372199		8.897	0.0421492	0.0372199	0.034591	0.0306475	0.284012	0.00567252	0.0122449	0.0217748	0.0447781	0.333634
	3.26721		0.0161883	0.0332765		8.92264	0.0161883	0.0332765	0.036234	0.0253896	0.279083	0.00600114	0.0175028	0.0188173	0.0378771	0.328376
	3.23796		0.0299903	0.0188173		8.8924	0.0299903	0.0188173	0.0378771	0.0244038	0.267253	0.00304358	0.01816	0.0158597	0.0342623	0.326076
	3.29185		0.00665838	0.0175028		8.8786	0.00665838	0.0175028	0.036234	0.025061	0.260023	0.00205772	0.0155311	0.0152025	0.0368913	0.322461
	3.35955		0.034591	0.0198031		8.85757	0.034591	0.0198031	0.0313048	0.0290044	0.259366	0.00468667	0.0132308	0.0152025	0.0414919	0.31786
	3.41147		0.0934137	0.0234179		8.85856	0.0934137	0.0234179	0.0247324	0.0263755	0.266596	0.00731562	0.0109304	0.0155311	0.0434637	0.318846
	3.40621		0.10623	0.0237465		8.89142	0.10623	0.0237465	0.0158597	0.0237465	0.271196	0.006987	0.0119163	0.0158597	0.0464212	0.323118
	3.40983		0.0152025	0.0244038		8.89043	0.0152025	0.0244038	0.0102732	0.020789	0.265938	0.00501529	0.0125735	0.01816	0.0454354	0.322132
	3.39931		0.084541	0.0299903		8.92132	0.084541	0.0299903	0.006987	0.0214462	0.263309	0.00632976	0.0135594	0.0237465	0.0441209	0.319503
	3.41771		0.131205	0.0382058		8.98244	0.131205	0.0382058	0.0106018	0.0234179	0.259366	0.00468667	0.0115877	0.0306475	0.043135	0.316546
	3.41541		0.153222	0.0428064		8.99526	0.153222	0.0428064	0.0165169	0.0336051	0.254765	0.00370081	0.00895871	0.0322906	0.0467498	0.303401
	3.39832		0.0947281	0.036234		8.98836	0.0947281	0.036234	0.0224321	0.0382058	0.250493	0.00567252	0.00665838	0.0296617	0.0506933	0.294857
	3.40884		0.0809262	0.0299903		9.01399	0.0809262	0.0299903	0.0280186	0.0332765	0.24885	0.00665838	0.00731562	0.0296617	0.052665	0.289928
	3.40654		0.0865127	0.020789		9.06657	0.0865127	0.020789	0.0309762	0.0257183	0.252465	0.00435805	0.00863009	0.0293331	0.0529936	0.283355
	3.38814		0.0970285	0.0125735		9.08102	0.0970285	0.0125735	0.0299903	0.0158597	0.25608	0.00271496	0.00830147	0.02769	0.0513505	0.276783
	3.32767		0.12759	0.00370081		9.04192	0.12759	0.00370081	0.0211176	0.0109304	0.262981	0.00238634	0.00895871	0.0247324	0.0506933	0.275797
	3.2373		0.0842124	0.00468667		9.03929	0.0842124	0.00468667	0.0158597	0.0178314	0.271196	0.00534391	0.0122449	0.0240752	0.0539794	0.273497
	3.19458		0.0907847	0.00632976		9.08398	0.0907847	0.00632976	0.0152025	0.0240752	0.273497	0.0102732	0.0119163	0.0253896	0.0579229	0.273168
	3.22843		0.0618663	0.00665838		9.09318	0.0618663	0.00665838	0.0148738	0.0267041	0.27021	0.0135594	0.0178314	0.0263755	0.0585801	0.271854
trace_05	5.64836		0.0907847	0.0293331		4.11931	0.0907847	0.0293331	0.0976857	0.0533222	3.63427	0.0240752	0.0125735	0.0198031	0.0562798	4.53534
	5.67399		0.0342623	0.0165169		4.13804	0.0342623	0.0165169	0.0690959	0.0378771	3.62606	0.0214462	0.00994457	0.0211176	0.0556225	4.46731
	5.69403		0.0349196	0.0122449		4.12227	0.0349196	0.0122449	0.0543081	0.0355768	3.60733	0.0191459	0.013888	0.0221035	0.0539794	4.41934
	5.71638		0.0990002	0.00830147		4.16039	0.0990002	0.00830147	0.0306475	0.0418206	3.60207	0.0191459	0.013888	0.0224321	0.0536508	4.34408
	5.70356		0.130219	0.00271496		4.22512	0.130219	0.00271496	0.0148738	0.02769	3.57216	0.01816	0.0102732	0.020789	0.056937	4.28822
	5.66774		0.100315	0.01816		4.33685	0.100315	0.01816	0.0175028	0.036234	3.52287	0.0178314	0.011259	0.0201317	0.0612091	4.23827
	5.66807		0.0198031	0.0211176		4.41802	0.0198031	0.0211176	0.0296617	0.0566084	3.48607	0.0145452	0.0129021	0.0237465	0.0641666	4.20574
	5.65164		0.0336051	0.0221035		4.50971	0.0336051	0.0221035	0.0293331	0.0753397	3.45813	0.00863009	0.0119163	0.0263755	0.0671242	4.14428
	5.6477		0.0621949	0.0270327		4.60435	0.0621949	0.0270327	0.056937	0.0878272	3.38617	0.00928733	0.0135594	0.0283472	0.0677814	4.10058
	5.66446		0.0464212	0.0352482		4.63918	0.0464212	0.0352482	0.0812548	0.100643	3.3027	0.0155311	0.0129021	0.0260469	0.0667956	4.0549
	5.68549		0.0736966	0.0414919		4.64871	0.0736966	0.0414919	0.0661383	0.106558	3.25505	0.01816	0.00895871	0.0240752	0.0608804	4.0112
	5.76271		0.0963712	0.0375485		4.65068	0.0963712	0.0375485	0.0520077	0.107544	3.2097	0.01816	0.00863009	0.0234179	0.0566084	3.89914
	5.76403		0.10623	0.0316334		4.62176	0.10623	0.0316334	0.0523364	0.0934137	3.15482	0.0168456	0.00863009	0.0237465	0.0536508	3.81961
	5.73117		0.127919	0.0244038		4.64871	0.127919	0.0244038	0.075011	0.0901275	3.09797	0.0171742	0.011259	0.0230893	0.0543081	3.74666
	5.71605		0.0812548	0.0214462		4.74171	0.0812548	0.0214462	0.0667956	0.0970285	3.04802	0.0165169	0.013888	0.0204604	0.0559512	3.68126
	5.67859		0.0411633	0.0224321		4.80546	0.0411633	0.0224321	0.0474071	0.0937423	3.00201	0.0152025	0.0165169	0.020789	0.0572656	3.59451
	5.60202		0.0615377	0.0201317		4.89353	0.0615377	0.0201317	0.0615377	0.070739	2.94188	0.0106018	0.0188173	0.0217748	0.0566084	3.54259
	5.54879		0.0598946	0.0191459		4.99047	0.0598946	0.0191459	0.0694245	0.0428064	2.86728	0.0106018	0.01816	0.0240752	0.0549653	3.4979
	5.51855		0.0464212	0.0191459		5.06309	0.0464212	0.0191459	0.0628522	0.0303189	2.76475	0.00928733	0.0175028	0.0234179	0.0549653	3.4532
	5.53926		0.0704104	0.0309762		5.13112	0.0704104	0.0309762	0.052665	0.0175028	2.66912	0.00534391	0.0161883	0.0211176	0.0562798	3.38847
	5.49884		0.0654811	0.0290044		5.16595	0.0654811	0.0290044	0.0359054	0.01816	2.57251	0.00895871	0.0135594	0.0211176	0.0589087	3.31749
	5.39927		0.0855268	0.0224321		5.17909	0.0855268	0.0224321	0.0329479	0.0487216	2.4736	0.0129021	0.011259	0.0191459	0.0602232	3.26162
	5.29937		0.0516791	0.0244038		5.2504	0.0516791	0.0244038	0.020789	0.0513505	2.35924	0.0132308	0.00534391	0.0175028	0.0585801	3.20345
	5.1906		0.0444495	0.0221035		5.32171	0.0444495	0.0221035	0.00205772	0.0549653	2.23995	0.0132308	0.00665838	0.0178314	0.0562798	3.12623
	5.11304		0.0408347	0.0211176		5.41603	0.0408347	0.0211176	0.0283472	0.0549653	2.12493	0.0109304	0.00994457	0.0204604	0.0529936	3.01713
	5.04403		0.0411633	0.0221035		5.49062	0.0411633	0.0221035	0.0474071	0.0437923	2.01813	0.0109304	0.0148738	0.0257183	0.0546367	2.95272
	5.02563		0.0480643	0.0165169		5.54813	0.0480643	0.0165169	0.0211176	0.0523364	1.92185	0.00961595	0.0194745	0.0283472	0.0549653	2.89094
	4.95564		0.045764	0.0102732		5.62075	0.045764	0.0102732	0.0385344	0.0493788	1.81373	0.00895871	0.0201317	0.0234179	0.0539794	2.83738
	4.89156		0.0536508	0.00337219		5.63751	0.0536508	0.00337219	0.0503646	0.0342623	1.7135	0.00797285	0.0194745	0.0237465	0.0513505	2.74635
	4.86592		0.0911133	0.00731562		5.65099	0.0911133	0.00731562	0.063838	0.0283472	1.63135	0.00632976	0.0168456	0.0267041	0.0480643	2.7079
	4.82058		0.0963712	0.0135594		5.69403	0.0963712	0.0135594	0.0506933	0.0221035	1.54952	0.00402943	0.0165169	0.0273613	0.0477357	2.67274
	4.78443		0.0809262	0.00928733		5.74431	0.0809262	0.00928733	0.0414919	0.0165169	1.49169	0.00402943	0.0152025	0.0296617	0.0497074	2.63856
	4.73645		0.0779686	0.00895871		5.79097	0.0779686	0.00895871	0.0411633	0.00961595	1.423	0.00731562	0.0145452	0.0286758	0.0513505	2.5804
	4.73875		0.0589087	0.0145452		5.83567	0.0589087	0.0145452	0.0395202	0.0155311	1.35334	0.00830147	0.0132308	0.0257183	0.056937	2.53603
	4.69242		0.0661383	0.0263755		5.90336	0.0661383	0.0263755	0.0441209	0.0240752	1.30109	0.00797285	0.0152025	0.0237465	0.0585801	2.48575
	4.63162		0.126604	0.0316334		6.00293	0.126604	0.0316334	0.0260469	0.0283472	1.24456	0.00928733	0.0122449	0.0214462	0.0592373	2.43679
	4.60238		0.154537	0.0247324		6.13273	0.154537	0.0247324	0.0122449	0.0382058	1.191	0.0142166	0.0119163	0.0178314	0.0533222	2.37501
	4.54651		0.138106	0.0184886		6.17644	0.138106	0.0184886	0.00468667	0.0434637	1.13481	0.0145452	0.0145452	0.0158597	0.0490502	2.35299
	4.44891		0.152894	0.0125735		6.1863	0.152894	0.0125735	0.0194745	0.0487216	1.0911	0.00994457	0.020789	0.0175028	0.0470785	2.32572
	4.41211		0.126604	0.0148738		6.2093	0.126604	0.0148738	0.0306475	0.0490502	1.05298	0.006987	0.0227607	0.0217748	0.045764	2.29187
	4.45055		0.123318	0.0161883		6.22376	0.123318	0.0161883	0.0283472	0.0490502	1.02669	0.00501529	0.0204604	0.0240752	0.0493788	2.22976
	4.50905		0.169982	0.0142166		6.28225	0.169982	0.0142166	0.020789	0.0454354	1.00467	0.00928733	0.0158597	0.025061	0.0533222	2.20249
	4.51956		0.174582	0.0194745		6.29441	0.174582	0.0194745	0.0234179	0.0355768	0.985613	0.00994457	0.0119163	0.0253896	0.0539794	2.17685
	4.48342		0.153222	0.0230893		6.28817	0.153222	0.0230893	0.0263755	0.025061	0.963267	0.00895871	0.00501529	0.0263755	0.0520077	2.13906
	4.46797		0.0901275	0.0234179		6.34107	0.0901275	0.0234179	0.0237465	0.0309762	0.940264	0.0102732	0.00402943	0.0221035	0.0497074	2.05855
	4.50445		0.0838837	0.0227607		6.39924	0.0838837	0.0227607	0.025061	0.031962	0.909373	0.0132308	0.00797285	0.020789	0.050036	2.01583
	4.50642		0.11083	0.0132308		6.43473	0.11083	0.0132308	0.0227607	0.0372199	0.883741	0.013888	0.00632976	0.0184886	0.0510219	1.98494
	4.47619		0.145993	0.0109304		6.45609	0.145993	0.0109304	0.0365627	0.038863	0.860409	0.013888	0.00994457	0.0204604	0.0513505	1.95635
	4.47783		0.166696	0.0129021		6.49322	0.166696	0.0129021	0.0483929	0.0428064	0.833791	0.0122449	0.0109304	0.0227607	0.0520077	1.89687
	4.44431		0.15848	0.0168456		6.50472	0.15848	0.0168456	0.0349196	0.0490502	0.817032	0.011259	0.00830147	0.0237465	0.0533222	1.86795
	4.42361		0.128247	0.0244038		6.49289	0.128247	0.0244038	0.0224321	0.045764	0.800272	0.0129021	0.00731562	0.0240752	0.0536508	1.84922
	4.42854		0.139092	0.0244038		6.53463	0.139092	0.0244038	0.0204604	0.0332765	0.792714	0.013888	0.0106018	0.0237465	0.050036	1.83345
	4.42098		0.141392	0.01816		6.61744	0.141392	0.01816	0.0273613	0.0306475	0.776283	0.0148738	0.0119163	0.0198031	0.0474071	1.80256
	4.48243		0.0963712	0.0122449		6.64438	0.0963712	0.0122449	0.0326192	0.0355768	0.755251	0.0115877	0.0168456	0.0175028	0.0503646	1.76148
	4.52515		0.0661383	0.00895871		6.69828	0.0661383	0.00895871	0.0270327	0.0234179	0.735863	0.00928733	0.0171742	0.0194745	0.0516791	1.72599
	4.49032		0.0631808	0.00632976		6.75513	0.0631808	0.00632976	0.0191459	0.00994457	0.721404	0.006987	0.0119163	0.0217748	0.0470785	1.69609
	4.45811		0.155851	0.00928733		6.77484	0.155851	0.00928733	0.00895871	0.013888	0.704315	0.00665838	0.00764424	0.0224321	0.0437923	1.66191
	4.43905		0.157494	0.0142166		6.78536	0.157494	0.0142166	0.00435805	0.0365627	0.685584	0.00961595	0.0102732	0.0224321	0.045764	1.62017
	4.45417		0.181483	0.00961595		6.82183	0.181483	0.00961595	0.00764424	0.0421492	0.673097	0.0119163	0.0115877	0.0214462	0.0493788	1.59323
	4.47093		0.18707	0.0122449		6.91483	0.18707	0.0122449	0.00600114	0.0414919	0.66291	0.0135594	0.0142166	0.0224321	0.0529936	1.57187
	4.41901		0.130876	0.0221035		6.97332	0.130876	0.0221035	0.0188173	0.036234	0.661266	0.013888	0.0129021	0.0198031	0.0552939	1.55215
	4.36577		0.0802689	0.0313048		7.03445	0.0802689	0.0313048	0.0188173	0.0293331	0.65568	0.0119163	0.00830147	0.0168456	0.059566	1.51305
	4.30531		0.0536508	0.036234		7.03313	0.0536508	0.036234	0.0165169	0.0201317	0.64845	0.0102732	0.0106018	0.0161883	0.0635094	1.4953
	4.24287		0.0658097	0.0224321		7.01637	0.0658097	0.0224321	0.0129021	0.00830147	0.638263	0.0102732	0.0152025	0.0165169	0.0612091	1.47887
	4.23235		0.0858554	0.0184886		7.01703	0.0858554	0.0184886	0.00961595	0.00468667	0.620518	0.00797285	0.0152025	0.01816	0.0592373	1.46934
	4.23531		0.0904561	0.020789		7.02196	0.0904561	0.020789	0.0102732	0.0102732	0.60343	0.00534391	0.0145452	0.0194745	0.0562798	1.44699
	4.21855		0.163738	0.0188173		7.07684	0.163738	0.0188173	0.00600114	0.0204604	0.595214	0.00797285	0.0135594	0.0211176	0.0546367	1.42728
	4.23531		0.181483	0.0155311		7.14322	0.181483	0.0155311	0.0132308	0.0293331	0.590613	0.0125735	0.0119163	0.0224321	0.0546367	1.40887
	4.234		0.187727	0.0125735		7.15472	0.187727	0.0125735	0.0194745	0.0316334	0.57484	0.013888	0.0135594	0.025061	0.0602232	1.38554
	4.24188		0.143692	0.00337219		7.16885	0.143692	0.00337219	0.031962	0.0405061	0.563667	0.0122449	0.0152025	0.0273613	0.0628522	1.33986
	4.30038		0.0700818	0.013888		7.17246	0.0700818	0.013888	0.0349196	0.0434637	0.548879	0.0106018	0.0135594	0.0267041	0.059566	1.32606
	4.34967		0.0812548	0.031962		7.19054	0.0812548	0.031962	0.0441209	0.0405061	0.536391	0.00994457	0.011259	0.0253896	0.052665	1.31095
	4.33981		0.0861841	0.0349196		7.23917	0.0861841	0.0349196	0.0444495	0.0441209	0.531134	0.00961595	0.0109304	0.0234179	0.0503646	1.29221
	4.27244		0.075011	0.0306475		7.29898	0.075011	0.0306475	0.0398489	0.0506933	0.512074	0.00895871	0.00731562	0.025061	0.0474071	1.26001
	4.16269		0.0927564	0.0184886		7.33052	0.0927564	0.0184886	0.0349196	0.0529936	0.489399	0.00928733	0.00337219	0.0270327	0.0474071	1.24128
	4.1686		0.103929	0.0273613		7.36569	0.103929	0.0273613	0.0313048	0.0520077	0.47724	0.0102732	0.00402943	0.0240752	0.0454354	1.22419
	4.20048		0.0556225	0.0365627		7.41399	0.0556225	0.0365627	0.0257183	0.0460926	0.479869	0.0122449	0.00731562	0.0221035	0.0487216	1.21039
	4.187		0.0759969	0.0401775		7.41071	0.0759969	0.0401775	0.0201317	0.0401775	0.475268	0.013888	0.0115877	0.0227607	0.0559512	1.19133
	4.18208		0.0684387	0.0378771		7.41301	0.0684387	0.0378771	0.0214462	0.0487216	0.461795	0.0119163	0.0148738	0.0244038	0.056937	1.17523
	4.16827		0.0418206	0.0178314		7.44422	0.0418206	0.0178314	0.0299903	0.0451067	0.457523	0.00863009	0.0171742	0.0253896	0.056937	1.16044
	4.11997		0.0618663	0.00764424		7.47643	0.0618663	0.00764424	0.0378771	0.0378771	0.452922	0.00797285	0.0142166	0.0286758	0.0513505	1.14762
	4.10847		0.100315	0.0115877		7.46624	0.100315	0.0115877	0.0391916	0.0339337	0.438135	0.006987	0.0115877	0.0293331	0.0497074	1.12166
	4.01185		0.128247	0.01816		7.48037	0.128247	0.01816	0.0391916	0.0398489	0.428276	0.00205772	0.00830147	0.025061	0.0497074	1.10162
	3.90505		0.159466	0.0260469		7.50534	0.159466	0.0260469	0.0342623	0.0414919	0.423347	0.00205772	0.00797285	0.0227607	0.0506933	1.08453
	3.90078		0.153551	0.0270327		7.49352	0.153551	0.0270327	0.0257183	0.0359054	0.419075	0.00337219	0.00961595	0.020789	0.0506933	1.06448
	3.85839		0.13712	0.0260469		7.53886	0.13712	0.0260469	0.0201317	0.0313048	0.411188	0.00830147	0.0115877	0.0230893	0.0516791	1.03491
	3.84919		0.112145	0.0263755		7.61806	0.112145	0.0263755	0.0188173	0.0267041	0.410202	0.0142166	0.0148738	0.0224321	0.0513505	1.01256
	3.84754		0.101301	0.0322906		7.60984	0.101301	0.0322906	0.0230893	0.0273613	0.406587	0.0125735	0.0178314	0.0211176	0.0503646	0.994486
	3.82553		0.0966999	0.0329479		7.66144	0.0966999	0.0329479	0.0263755	0.0263755	0.397057	0.0115877	0.0194745	0.0227607	0.0520077	0.974768
	3.86628		0.101958	0.0355768		7.74326	0.101958	0.0355768	0.0194745	0.0303189	0.392128	0.013888	0.0165169	0.0257183	0.050036	0.956037
	3.91524		0.106887	0.0375485		7.76593	0.106887	0.0375485	0.0145452	0.0385344	0.388184	0.0109304	0.00928733	0.0296617	0.0464212	0.941249
	3.91721		0.070739	0.0286758		7.78434	0.070739	0.0286758	0.0125735	0.0414919	0.377669	0.00863009	0.00928733	0.031962	0.0451067	0.932048
	3.88994		0.0832265	0.0155311		7.78729	0.0832265	0.0155311	0.0115877	0.0352482	0.37011	0.00600114	0.0106018	0.0296617	0.0444495	0.921861
	3.87022		0.0815834	0.0253896		7.78236	0.0815834	0.0253896	0.0122449	0.0303189	0.359266	0.00304358	0.0109304	0.0293331	0.0447781	0.911345
	3.88632		0.052665	0.0224321		7.75838	0.052665	0.0224321	0.0109304	0.0290044	0.352036	0.00370081	0.00764424	0.0306475	0.0447781	0.887685
	3.88895		0.0871699	0.0148738		7.73833	0.0871699	0.0148738	0.0122449	0.0296617	0.357952	0.00304358	0.00468667	0.0316334	0.0464212	0.874868
	3.85083		0.0618663	0.00797285		7.7587	0.0618663	0.00797285	0.00797285	0.0336051	0.347436	0.00337219	0.00370081	0.0290044	0.0464212	0.859423
	3.83374		0.0667956	0.0158597		7.80931	0.0667956	0.0158597	0.00665838	0.0401775	0.338563	0.00501529	0.00830147	0.0309762	0.0483929	0.846279
	3.82651		0.118389	0.0221035		7.8195	0.118389	0.0221035	0.00567252	0.0421492	0.336591	0.00665838	0.0135594	0.0329479	0.0549653	0.823604
	3.80515		0.119046	0.0263755		7.83987	0.119046	0.0263755	0.00238634	0.0421492	0.343821	0.00632976	0.0148738	0.0303189	0.0582515	0.815389
	3.80318		0.114117	0.0339337		7.85203	0.114117	0.0339337	0.0102732	0.0342623	0.350722	0.006987	0.013888	0.0286758	0.059566	0.809473
	3.78445		0.0727107	0.0270327		7.88522	0.0727107	0.0270327	0.0135594	0.0280186	0.356637	0.00961595	0.0155311	0.0263755	0.0598946	0.802572
	3.77295		0.0658097	0.0257183		7.89902	0.0658097	0.0257183	0.00961595	0.0257183	0.34645	0.0145452	0.0171742	0.0237465	0.0572656	0.792385
	3.80548		0.0592373	0.043135		7.88785	0.0592373	0.043135	0.0168456	0.0270327	0.328376	0.0148738	0.0161883	0.0194745	0.0529936	0.786142
	3.83506		0.0907847	0.06811		7.89508	0.0907847	0.06811	0.0201317	0.0247324	0.321804	0.0171742	0.0152025	0.0168456	0.0493788	0.776612
	3.74699		0.122003	0.0782972		7.9309	0.122003	0.0782972	0.0263755	0.0165169	0.31786	0.0175028	0.0132308	0.0184886	0.0520077	0.763467
	3.66122		0.151251	0.0779686		7.96244	0.151251	0.0779686	0.0316334	0.0102732	0.325418	0.0188173	0.0122449	0.0224321	0.0533222	0.736192
	3.64512		0.115102	0.0658097		7.9976	0.115102	0.0658097	0.0313048	0.00994457	0.330348	0.0201317	0.0145452	0.0273613	0.0480643	0.718117
	3.63657		0.0789545	0.0368913		8.05807	0.0789545	0.0368913	0.0293331	0.0188173	0.327719	0.0204604	0.0158597	0.0283472	0.0454354	0.704315
	3.64216		0.10853	0.0214462		8.09487	0.10853	0.0214462	0.0234179	0.0221035	0.321475	0.0161883	0.0142166	0.0283472	0.0493788	0.695443
	3.65333		0.170968	0.006987		8.08633	0.170968	0.006987	0.0198031	0.0290044	0.309645	0.0109304	0.0115877	0.0280186	0.0520077	0.680326
	3.65596		0.178526	0.0109304		8.04328	0.178526	0.0109304	0.0240752	0.0326192	0.297814	0.00764424	0.00731562	0.0240752	0.0529936	0.673425
	3.6645		0.132191	0.0175028		7.95981	0.132191	0.0175028	0.02769	0.0322906	0.295514	0.00534391	0.00567252	0.0224321	0.0549653	0.662252
	3.67929		0.0664669	0.0198031		7.98742	0.0664669	0.0198031	0.0329479	0.0336051	0.295843	0.00205772	0.00928733	0.0237465	0.0546367	0.650093
	3.68586		0.0812548	0.0168456		8.04854	0.0812548	0.0168456	0.0368913	0.034591	0.292228	0.00337219	0.00863009	0.0244038	0.0536508	0.639249
	3.63099		0.0878272	0.006987		8.05182	0.0878272	0.006987	0.0263755	0.0313048	0.28927	0.00534391	0.00764424	0.0224321	0.0559512	0.63662
	3.59812		0.0648239	0.0165169		8.04459	0.0648239	0.0165169	0.0214462	0.0299903	0.287956	0.00501529	0.00863009	0.0211176	0.0536508	0.63432
	3.65136		0.0474071	0.0303189		8.08633	0.0474071	0.0303189	0.0273613	0.0244038	0.288942	0.00370081	0.0119163	0.0211176	0.0467498	0.627419
	3.7069		0.0861841	0.0408347		8.10966	0.0861841	0.0408347	0.0359054	0.0221035	0.287956	0.00107186	0.0119163	0.0247324	0.0454354	0.607702
	3.70624		0.124961	0.0424778		8.13069	0.124961	0.0424778	0.0444495	0.0247324	0.285984	0.00337219	0.0142166	0.0247324	0.0437923	0.593571
	3.68126		0.136463	0.0359054		8.18557	0.136463	0.0359054	0.0441209	0.0280186	0.284998	0.00337219	0.0155311	0.0244038	0.0470785	0.584041
	3.59057		0.0654811	0.0257183		8.23256	0.0654811	0.0257183	0.0375485	0.0280186	0.283684	0.00205772	0.0188173	0.0244038	0.0490502	0.576154
	3.51301		0.0815834	0.0191459		8.26279	0.0815834	0.0191459	0.02769	0.0253896	0.280398	0.00238634	0.0201317	0.0234179	0.0490502	0.568596
	3.48442		0.141063	0.0115877		8.23913	0.141063	0.0115877	0.0168456	0.0270327	0.284012	0.006987	0.0184886	0.0188173	0.0529936	0.560052
	3.49165		0.203829	0.00632976		8.21087	0.203829	0.00632976	0.0132308	0.0257183	0.284341	0.00764424	0.0132308	0.0191459	0.0585801	0.550193
	3.51433		0.195614	0.0161883		8.23946	0.195614	0.0161883	0.0142166	0.0237465	0.285656	0.00764424	0.00961595	0.0214462	0.0625235	0.544278
	3.51334		0.131533	0.0267041		8.23486	0.131533	0.0267041	0.0161883	0.0280186	0.280398	0.00600114	0.00994457	0.025061	0.063838	0.541978
	3.48245		0.124632	0.0247324		8.28218	0.124632	0.0247324	0.0148738	0.0316334	0.273168	0.006987	0.00797285	0.025061	0.0589087	0.528505
	3.43184		0.140735	0.0161883		8.34626	0.140735	0.0161883	0.0132308	0.0368913	0.274482	0.00994457	0.00830147	0.0270327	0.052665	0.521604
	3.39964		0.0996574	0.0142166		8.33903	0.0996574	0.0142166	0.00994457	0.0359054	0.282041	0.0129021	0.0125735	0.0293331	0.0483929	0.512402
	3.40358		0.0720535	0.0165169		8.32293	0.0720535	0.0165169	0.0125735	0.0322906	0.27744	0.0142166	0.0142166	0.0313048	0.0454354	0.505501
	3.41147		0.0523364	0.013888		8.32818	0.0523364	0.013888	0.0115877	0.0378771	0.271854	0.0119163	0.011259	0.0309762	0.045764	0.490713
	3.38058		0.0378771	0.0234179		8.33508	0.0378771	0.0234179	0.0115877	0.0405061	0.263309	0.0106018	0.00895871	0.0303189	0.0487216	0.480198
	3.34607		0.0474071	0.0267041		8.3272	0.0474071	0.0267041	0.00797285	0.0401775	0.266596	0.0102732	0.0115877	0.0283472	0.0520077	0.473625
	3.3418		0.0753397	0.02769		8.3203	0.0753397	0.02769	0.0106018	0.0411633	0.271854	0.0115877	0.0168456	0.0303189	0.0510219	0.470996
	3.33917		0.0736966	0.0286758		8.35513	0.0736966	0.0286758	0.0135594	0.0398489	0.280069	0.0119163	0.0145452	0.0260469	0.0497074	0.458509
	3.35035		0.0612091	0.0316334		8.38766	0.0612091	0.0316334	0.0214462	0.0395202	0.28467	0.0109304	0.0125735	0.0221035	0.0497074	0.450951
	3.33917		0.0832265	0.0418206		8.38963	0.0832265	0.0418206	0.0214462	0.0408347	0.285984	0.011259	0.0109304	0.0168456	0.0467498	0.445035
	3.32964		0.0730393	0.0480643		8.39029	0.0730393	0.0480643	0.0168456	0.038863	0.284998	0.0119163	0.0125735	0.0142166	0.0470785	0.440435
	3.34969		0.0493788	0.0467498		8.38273	0.0493788	0.0467498	0.0194745	0.0385344	0.285327	0.0135594	0.013888	0.0161883	0.0464212	0.435834
	3.39898		0.0605518	0.0441209		8.39621	0.0605518	0.0441209	0.0240752	0.0375485	0.286641	0.0119163	0.0152025	0.0217748	0.0470785	0.436163
	3.46931		0.06811	0.0382058		8.49052	0.06811	0.0382058	0.0204604	0.0368913	0.289599	0.011259	0.0142166	0.0280186	0.0480643	0.434848
	3.51137		0.119375	0.045764		8.52633	0.119375	0.045764	0.0109304	0.0385344	0.281383	0.00994457	0.0132308	0.0296617	0.0493788	0.428933
	3.49954		0.148622	0.0467498		8.48723	0.148622	0.0467498	0.0122449	0.0365627	0.276454	0.013888	0.0115877	0.02769	0.0467498	0.414474
	3.42856		0.099986	0.036234		8.4547	0.099986	0.036234	0.0194745	0.0253896	0.273497	0.0142166	0.0109304	0.0263755	0.0467498	0.407244
	3.39701		0.0792831	0.0372199		8.43794	0.0792831	0.0372199	0.0247324	0.0201317	0.266596	0.013888	0.0109304	0.0211176	0.0474071	0.404944
	3.37368		0.130876	0.0322906		8.45437	0.130876	0.0322906	0.0237465	0.0132308	0.263638	0.0119163	0.0132308	0.0168456	0.0480643	0.406587
	3.35429		0.164395	0.0257183		8.46587	0.164395	0.0257183	0.0224321	0.0198031	0.263309	0.00665838	0.0168456	0.0165169	0.0474071	0.406259
	3.31321		0.11806	0.0161883		8.44353	0.11806	0.0161883	0.0188173	0.0313048	0.262981	0.00665838	0.0188173	0.0148738	0.0490502	0.398372
	3.27411		0.103272	0.0129021		8.43827	0.103272	0.0129021	0.0129021	0.0306475	0.264624	0.0102732	0.020789	0.0155311	0.0506933	0.388842
	3.24979		0.0993288	0.0171742		8.42315	0.0993288	0.0171742	0.00632976	0.0332765	0.268239	0.0129021	0.0221035	0.0168456	0.0543081	0.37734
	3.23829		0.0937423	0.0194745		8.40804	0.0937423	0.0194745	0.0135594	0.0359054	0.274154	0.00994457	0.020789	0.0161883	0.0566084	0.361895
	3.28397		0.0825693	0.0178314		8.41066	0.0825693	0.0178314	0.01816	0.0414919	0.278097	0.00435805	0.0184886	0.0158597	0.0546367	0.354337
	3.31617		0.059566	0.0142166		8.40705	0.059566	0.0142166	0.0204604	0.0441209	0.272182	0.00600114	0.0161883	0.01816	0.0523364	0.347764
	3.32767		0.0973571	0.00632976		8.41559	0.0973571	0.00632976	0.0286758	0.0470785	0.272182	0.00764424	0.0135594	0.0211176	0.0513505	0.339878
	3.33753		0.113459	0.0158597		8.42677	0.113459	0.0158597	0.0283472	0.045764	0.274482	0.00731562	0.013888	0.0227607	0.0539794	0.335606
	3.36941		0.0631808	0.0296617		8.4777	0.0631808	0.0296617	0.0184886	0.0497074	0.269553	0.00961595	0.0129021	0.0227607	0.0559512	0.33692
	3.40588		0.117731	0.0329479		8.56774	0.117731	0.0329479	0.00468667	0.0523364	0.263638	0.00665838	0.0129021	0.0244038	0.0559512	0.335277
	3.44499		0.149607	0.0267041		8.62459	0.149607	0.0267041	0.00632976	0.0460926	0.265938	0.00304358	0.0161883	0.0260469	0.0582515	0.331662
	3.39077		0.123975	0.0230893		8.65811	0.123975	0.0230893	0.0135594	0.0444495	0.267581	0.00402943	0.0211176	0.0260469	0.0582515	0.331005
	3.29382		0.100643	0.0188173		8.68768	0.100643	0.0188173	0.0165169	0.0477357	0.264624	0.00797285	0.0224321	0.0263755	0.0589087	0.333962
	3.24782		0.0694245	0.0211176		8.73467	0.0694245	0.0211176	0.0211176	0.0444495	0.258052	0.00665838	0.0194745	0.0260469	0.0592373	0.334948
	3.29547		0.0838837	0.0129021		8.70674	0.0838837	0.0129021	0.0198031	0.0464212	0.261009	0.00534391	0.0158597	0.025061	0.0582515	0.33462
	3.30335		0.0865127	0.00632976		8.64431	0.0865127	0.00632976	0.0119163	0.0483929	0.262324	0.00534391	0.0152025	0.0194745	0.0559512	0.331662
	3.30204		0.112802	0.00402943		8.62886	0.112802	0.00402943	0.00665838	0.0401775	0.262652	0.006987	0.0106018	0.0201317	0.0552939	0.324432
	3.2958		0.171953	0.00238634		8.6282	0.171953	0.00238634	0.0109304	0.0316334	0.262324	0.00830147	0.00863009	0.020789	0.0556225	0.321475
	3.31716		0.199229	0.0161883		8.64529	0.199229	0.0161883	0.0204604	0.0263755	0.260352	0.00600114	0.00632976	0.0184886	0.056937	0.32016
	3.28199		0.216974	0.0191459		8.65515	0.216974	0.0191459	0.0316334	0.0283472	0.261995	0.00205772	0.00928733	0.020789	0.0572656	0.316874
	3.19524		0.175897	0.0204604		8.60947	0.175897	0.0204604	0.0322906	0.0270327	0.272511	0.00370081	0.0145452	0.0204604	0.0539794	0.305701
	3.09008		0.127261	0.0211176		8.60651	0.127261	0.0211176	0.0306475	0.0260469	0.273168	0.00600114	0.013888	0.0290044	0.0539794	0.298472
	3.10421		0.121346	0.0240752		8.62065	0.121346	0.0240752	0.0273613	0.0290044	0.267253	0.00895871	0.0145452	0.0339337	0.0543081	0.297157
	3.22449		0.119703	0.0201317		8.62393	0.119703	0.0201317	0.0247324	0.0329479	0.261995	0.0102732	0.0191459	0.0349196	0.0539794	0.296829
	3.26786		0.157494	0.0171742		8.61374	0.157494	0.0171742	0.0194745	0.0339337	0.265281	0.00863009	0.0201317	0.0286758	0.0510219	0.296171
	3.25603		0.12759	0.0165169		8.66336	0.12759	0.0165169	0.0194745	0.0309762	0.272511	0.00797285	0.0178314	0.0257183	0.0483929	0.291242
	3.21101		0.0382058	0.00928733		8.69261	0.0382058	0.00928733	0.0221035	0.0339337	0.268896	0.00797285	0.0132308	0.0230893	0.0487216	0.28467
	3.2281		0.0122449	0.0017291		8.7028	0.0122449	0.0017291	0.0237465	0.034591	0.266596	0.00797285	0.0122449	0.0194745	0.050036	0.282041
	3.26031		0.0253896	0.00731562		8.7166	0.0253896	0.00731562	0.0273613	0.0352482	0.266924	0.00665838	0.0135594	0.0188173	0.0546367	0.277769
	3.25078		0.056937	0.00731562		8.71035	0.056937	0.00731562	0.0253896	0.0332765	0.265938	0.00567252	0.0135594	0.0191459	0.0559512	0.274154
	3.26458		0.0342623	0.0135594		8.68111	0.0342623	0.0135594	0.0221035	0.0375485	0.258052	0.00468667	0.0161883	0.0171742	0.052665	0.269882
	3.28594		0.0608804	0.0211176		8.62722	0.0608804	0.0211176	0.0201317	0.0391916	0.249507	0.00337219	0.0171742	0.0191459	0.0490502	0.264295
	3.29678		0.0644952	0.0237465		8.60849	0.0644952	0.0237465	0.0145452	0.0395202	0.248522	0.00435805	0.0178314	0.0204604	0.0444495	0.254437

## Sheet: 9E
	koff (s-1)
	Fura-2 channel ex: 340	Fura-2 channel ex: 370	Fluo-4 channel	Calbryte 630 channel	Fura-2 ratio: 370/340
replicate_01	114.1	120.4	356.1	180	82.94
replicate_02	116.7	118.6	353.6	178.9	82.78
replicate_03	112.9	121.8	350.6	178.4	84.37
replicate_04	115.5	125.7	356.1	176	86.4
