# Supplementary material for: Simultaneous recording of multiple cellular signaling events by frequency- and spectrally-tuned multiplexing of fluorescent probes
Source: eLife. 2021 Dec 3;10:e63129. doi: 10.7554/eLife.63129 (PMC8700268; doi:10.7554/eLife.63129)
Supplement: Figure 11—source data 1. [file elife-63129-fig11-data1.xlsx]

## Sheet: 11B
signal onset (s)
cAMP signal		Ca2+ signal
M329C	wildtype	no sensor	R307Q	M329C	wildtype
8	9	13	17	39	19
8	15	13	8	36	72
3	10	13	12	32	26
6	18	12	22	23	51
6	10	8	11	32	48
7	5	7	11	27	13
6	7	5	16	25	36
6	8	7	12	24	45
6	16	20	24	15	105
11	6	9	17	36	16
12	14	10	17	33	64
14	12	12	22	37	24
7	9	21	24	21	14
11	18	11	18	34	85
2	14	21		18	30
	14	23			36
	13	23			15
	18	16			112
	7	17			46
	8	14			38
	12	11			47
	5	9			23
		16
		21

## Sheet: 11C
Time cAMP signal saturation (s)	Ca2+ signal onset (s)
	wildtype	M329C
37		39
38		36
22		32
22		23
50		32
25		27
25		25
24		24
16		15
29		36
20		33
49		37
16		21
37		34
14		18
18	19
77	72
22	26
48	51
45	48
12	13
33	36
32	45
80	105
20	16
65	64
30	24
53	14
69	85
34	36
116	112
46	46
34	38
28	47
19	23
