# Supplementary material for: Simultaneous recording of multiple cellular signaling events by frequency- and spectrally-tuned multiplexing of fluorescent probes
Source: eLife journal article supplement (doi:10.7554/elife.63129), 2021-12-03
Supplement: supp [file elife_poa_e63129_Figure_5_source_data_1.xlsx]

## Sheet: 5C & E
	Triple-loaded				Single-loaded
	Vrest (mV)				Vrest (mV)
	-46.2	-53	-53.6	-47.7	-48.8	-56.7	-54.7	-51.1
	Vm at onset - pH (mV)				Vm at onset - pH (mV)
5 pM resact	-55.3	-63.1	-63.4	-63.9	-58.3	-65.4	-63.9	-64.6
50 pM resct	-68.4	-70.4	-74.4	-72.4	-70.6	-77.1	-77.1	-76.9
500 pM resact	-71.5	-82.5	-79.1	-75.6	-73.2	-81.5	-81.4	-76.1
	Vm at onset - Ca2+ (mV)				Vm at onset - Ca2+ (mV)
5 pM resact	-58.4	-67.4	-65.2	-65.6	-60.9	-68	-65	-65.5
50 pM resct	-73.2	-77.2	-78.1	-74.8	-78.2	-80.7	-79.3	-74.5
500 pM resact	-79.4	-89.8	-87	-80.6	-81.5	-87.9	-87.2	-79.5
`
